# Supplementary material for: S6K1 amplification confers innate resistance to CDK4/6 inhibitors through activating c-Myc pathway in patients with estrogen receptor-positive breast cancer
Source: Mol Cancer. 2022 Aug 30;21:171. doi: 10.1186/s12943-022-01642-5 (PMC9426012; doi:10.1186/s12943-022-01642-5)
Supplement: Supplementary file 6 — Additional file 6: Supplementary Table S6. Clinical characteristics of patients received palbociclib treatment in the validation cohort. [file 12943_2022_1642_MOESM6_ESM.xlsx]

## Sheet: SHEET1
Supplementary Table S6. Clinical characteristics of patients received palbociclib treatment in the validation cohort.
Patient ID	Age	Stage at diagnosis	Visceral disease	Bone-only disease	Number of metastatic sites	Previous lines of therapy
994268	48	4	No	No	3	1
985780	47	4	Yes	No	6	1
964940	45	4	No	No	2	1
932423	37	1	No	No	2	0
916755	37	4	Yes	No	2	2
894855	54	2	No	Yes	1	0
840465	50	2	Yes	No	1	1
807948	84	3	No	No	2	0
795074	44	3	Yes	No	3	1
780170	49	4	Yes	No	3	1
768480	41	3	No	No	1	0
756209	80	1	Yes	No	1	0
721936	64	2	Yes	No	4	2
692272	61	3	Yes	No	2	2
678689	69	3	No	No	1	3
672952	36	3	No	Yes	1	0
665353	34	2	Yes	No	4	2
662319	41	4	Yes	No	2	1
659808	40	4	Yes	No	4	3
653368	71	1	No	No	1	0
629474	32	3	Yes	No	1	1
620555	68	1	Yes	No	3	3
588240	51	3	Yes	No	4	1
565457	51	2	No	Yes	1	0
561102	67	3	No	No	1	0
560411	50	2	Yes	No	2	1
546497	59	3	Yes	No	2	1
534355	39	1	Yes	No	1	2
498099	49	1	Yes	No	2	0
497944	49	4	No	Yes	1	1
494328	45	2	Yes	No	2	0
484168	69	1	No	Yes	1	0
483148	51	3	No	Yes	1	0
453703	55	2	Yes	No	2	2
447161	67	2	Yes	No	1	2
418542	49	4	Yes	No	2	3
397067	70	1	Yes	No	3	2
