# Supplementary material for: S6K1 amplification confers innate resistance to CDK4/6 inhibitors through activating c-Myc pathway in patients with estrogen receptor-positive breast cancer
Source: Mol Cancer. 2022 Aug 30;21:171. doi: 10.1186/s12943-022-01642-5 (PMC9426012; doi:10.1186/s12943-022-01642-5)
Supplement: Supplementary file 7 — Additional file 7: Supplementary Table S7. The list of significantly differentially expressed genes in S6K1-depleted MCF-7 cells revealed by RNA-seq. [file 12943_2022_1642_MOESM7_ESM.xlsx]

## Sheet: RPKM_of_all_diff_genes
Supplementary Table S7. The list of significantly differentially expressed genes in S6K1-depleted MCF-7 cells revealed by RNA-seq.
Geneid	Chr	Start	End	Strand	Length	si_pool_1	si_pool_2	si_pool_3	si_NC_1	si_NC_2	si_NC_3	si_pool___si_NC_PValue	si_pool___si_NC_FDR	si_pool___si_NC_logFC
A2ML1	12;12;12;12;12;12;12;12;12;12;12;12;12;12;12;12;12;12;12;12;12;12;12;12;12;12;12;12;12;12;12;12;12;12;12;12;12;12;12;12;12;12;12;12;12;12;12;12;12;12;12;12;12;12;12;12;12;12;12;12;12;12;12;12;12;12;12;12;12;12;12;12;12;12;12;12;12;12;12;12;12;12;12;12;12;12;12;12;12;12;12;12;12;12;12;12;12;12;12;12;12;12;12;12;12;12;12;12;12;12;12;12	8822472;8823182;8823513;8823720;8823720;8829727;8829727;8834662;8834662;8835507;8836255;8837440;8838336;8839113;8841369;8843134;8843236;8844954;8845004;8845281;8845283;8845442;8845442;8845442;8845442;8845442;8846077;8846077;8846077;8846077;8846077;8846077;8847549;8847549;8847549;8847549;8847549;8848720;8848720;8848720;8848720;8848720;8849669;8849669;8849669;8850160;8850160;8850160;8851784;8851784…	8822713;8823365;8823582;8823882;8823882;8829779;8829779;8834935;8834682;8835666;8836339;8837566;8838450;8839222;8841536;8843361;8843361;8845306;8845174;8845311;8845502;8845502;8845502;8845502;8845502;8845502;8846222;8846222;8846124;8846222;8846222;8846222;8847698;8847698;8847698;8847698;8847698;8848795;8848901;8848914;8848914;8848914;8849759;8849759;8849759;8850274;8850274;8850274;8852012;8852012…	+;+;+;+;+;+;+;+;+;+;+;+;+;+;+;+;+;+;+;+;+;+;+;+;+;+;+;+;+;+;+;+;+;+;+;+;+;+;+;+;+;+;+;+;+;+;+;+;+;+;+;+;+;+;+;+;+;+;+;+;+;+;+;+;+;+;+;+;+;+;+;+;+;+;+;+;+;+;+;+;+;+;+;+;+;+;+;+;+;+;+;+;+;+;+;+;+;+;+;+;+;+;+;+;+;+;+;+;+;+;+;+	7303	0.166788	0.216479	0.15636	0.0646339	0.0208038	0.0319224	0.000110848	0.000715593	2.05248
A2MP1	12;12;12;12;12;12;12;12;12;12;12;12;12;12;12;12;12;12;12;12;12;12;12;12;12;12;12;12;12;12;12;12;12;12;12;12;12;12;12;12;12;12;12;12;12;12;12;12;12;12;12;12	9228533;9229372;9229376;9230253;9230253;9231010;9231010;9231606;9231606;9232055;9232055;9232362;9232362;9233386;9233469;9234135;9234135;9234603;9235092;9235889;9236265;9236974;9240663;9240932;9241254;9241884;9242623;9245549;9247548;9247656;9253585;9253605;9253605;9256644;9256644;9256644;9259368;9261246;9262527;9262530;9263706;9263706;9265641;9265641;9267999;9267999;9270370;9271569;9273049;9274220…	9228698;9229413;9229413;9230355;9230355;9231078;9231078;9231696;9231696;9232185;9232185;9232580;9232580;9233692;9233692;9234312;9234207;9234675;9235248;9235974;9236441;9237057;9240714;9241053;9241380;9242111;9242677;9245600;9247712;9247712;9253754;9253754;9253754;9256786;9256786;9256793;9259557;9261309;9262757;9262757;9263864;9263864;9265750;9265750;9268113;9268113;9270493;9271653;9273217;9274291…	-;-;-;-;-;-;-;-;-;-;-;-;-;-;-;-;-;-;-;-;-;-;-;-;-;-;-;-;-;-;-;-;-;-;-;-;-;-;-;-;-;-;-;-;-;-;-;-;-;-;-;-	4657	0.209242	0.275825	0.317853	0.0552858	0.130496	0.160192	0.00663207	0.0189443	1.1527
AATF	17;17;17;17;17;17;17;17;17;17;17;17;17;17;17;17;17;17;17;17;17;17;17;17;17;17;17;17;17;17;17;17;17;17;17;17	36948875;36949019;36950214;36950214;36952886;36953770;36953798;36986617;36986617;36988519;36988519;36988658;36989247;36989247;36990774;36990774;36990775;37018951;37019005;37019005;37019005;37020934;37020934;37020934;37020934;37031365;37031614;37051135;37054465;37054827;37056601;37056601;37056601;37056601;37056601;37056601	36949216;36949216;36950264;36950405;36953296;36953907;36953907;36986731;36986731;36988692;36988720;36988720;36989411;36989411;36990857;36990857;36990857;37019072;37019072;37019072;37019072;37021014;37021154;37021014;37021014;37031685;37031685;37051241;37054713;37056870;37056865;37056858;37056869;37056871;37056870;37056871	+;+;+;+;+;+;+;+;+;+;+;+;+;+;+;+;+;+;+;+;+;+;+;+;+;+;+;+;+;+;+;+;+;+;+;+	4714	18.4801	18.9905	18.9662	59.806	60.9677	69.5432	1.19472e-13	3.86797e-10	-1.83549
ABC7-42404400C24.1	10;10;10;10;10;10;10;10;10;10;10;10;10;10;10;10;10;10;10;10;10;10;10	47750864;47752137;47754135;47756043;47756043;47756043;47757208;47757208;47757208;47757921;47757921;47757921;47759632;47759632;47759632;47760787;47760787;47760787;47761441;47761441;47762634;47762634;47762634	47754314;47752222;47754314;47756222;47756222;47756222;47757328;47757328;47757328;47758091;47758091;47758091;47759927;47759927;47759927;47760929;47760929;47760929;47761645;47761645;47762707;47762793;47763592	-;-;-;-;-;-;-;-;-;-;-;-;-;-;-;-;-;-;-;-;-;-;-	5526	1.32253	0.965562	1.10974	0.163071	0.155798	0.151876	5.33778e-10	8.97781e-08	2.75846
ABCA12	2;2;2;2;2;2;2;2;2;2;2;2;2;2;2;2;2;2;2;2;2;2;2;2;2;2;2;2;2;2;2;2;2;2;2;2;2;2;2;2;2;2;2;2;2;2;2;2;2;2;2;2;2;2;2;2;2;2;2;2;2;2;2;2;2;2;2;2;2;2;2;2;2;2;2;2;2;2;2;2;2;2;2;2;2;2;2;2;2;2;2;2;2;2;2;2;2;2;2;2;2	214931542;214932622;214934078;214934078;214937510;214937510;214942925;214942925;214945001;214945001;214947422;214947422;214948596;214948596;214949040;214949040;214950879;214950879;214953854;214953854;214955202;214955202;214956663;214956663;214958277;214958277;214959024;214959024;214966848;214966848;214968720;214968720;214970273;214970273;214973949;214973949;214974778;214974778;214975785;214975785…	214932741;214932741;214934215;214934215;214937615;214937615;214943017;214943017;214945104;214945104;214947556;214947556;214948737;214948737;214949149;214949149;214951083;214951083;214954107;214954107;214955361;214955361;214956778;214956778;214958454;214958454;214959078;214959078;214966953;214966953;214968807;214968807;214970400;214970400;214974042;214974042;214974864;214974864;214976037;214976037…	-;-;-;-;-;-;-;-;-;-;-;-;-;-;-;-;-;-;-;-;-;-;-;-;-;-;-;-;-;-;-;-;-;-;-;-;-;-;-;-;-;-;-;-;-;-;-;-;-;-;-;-;-;-;-;-;-;-;-;-;-;-;-;-;-;-;-;-;-;-;-;-;-;-;-;-;-;-;-;-;-;-;-;-;-;-;-;-;-;-;-;-;-;-;-;-;-;-;-;-;-	9416	2.77865	3.0222	3.63368	0.838533	0.941228	0.901222	7.83868e-11	2.1511e-08	1.73531
ABCA3	16;16;16;16;16;16;16;16;16;16;16;16;16;16;16;16;16;16;16;16;16;16;16;16;16;16;16;16;16;16;16;16;16;16;16;16;16;16;16;16;16;16;16;16;16;16;16;16;16;16;16;16;16;16;16;16;16;16;16;16;16;16;16;16;16;16;16;16;16;16;16;16;16;16;16;16;16;16;16;16;16;16;16;16;16;16;16;16;16;16;16;16;16;16;16;16;16;16	2275881;2275881;2277597;2277597;2277879;2277879;2278288;2278288;2278295;2278943;2278943;2278943;2281027;2281027;2281027;2281381;2281381;2281381;2281393;2283186;2283186;2283186;2283186;2284279;2284279;2284779;2284779;2285442;2285442;2286694;2286694;2288026;2288026;2289048;2289434;2289434;2292140;2292140;2292140;2295590;2295590;2295590;2297329;2297329;2297329;2297766;2297766;2297766;2298386;2298386…	2276805;2276805;2277670;2277670;2278069;2278069;2278458;2278458;2278458;2279130;2279130;2279130;2281221;2281221;2281221;2281509;2281509;2281509;2281505;2283741;2283972;2283358;2283358;2284437;2284437;2284998;2284998;2285646;2285646;2286967;2286967;2288329;2288329;2289620;2289620;2289620;2292238;2292238;2292238;2295740;2295740;2295740;2297539;2297539;2297539;2297921;2297921;2297921;2298540;2298540…	-;-;-;-;-;-;-;-;-;-;-;-;-;-;-;-;-;-;-;-;-;-;-;-;-;-;-;-;-;-;-;-;-;-;-;-;-;-;-;-;-;-;-;-;-;-;-;-;-;-;-;-;-;-;-;-;-;-;-;-;-;-;-;-;-;-;-;-;-;-;-;-;-;-;-;-;-;-;-;-;-;-;-;-;-;-;-;-;-;-;-;-;-;-;-;-;-;-	7804	1.27986	1.27247	1.59329	5.43261	4.89952	6.18372	3.8059e-12	2.9766e-09	-2.07211
ABCC10	6;6;6;6;6;6;6;6;6;6;6;6;6;6;6;6;6;6;6;6;6;6;6;6;6;6;6;6;6;6;6;6;6;6;6;6;6;6;6;6;6;6;6;6;6;6;6;6;6;6;6;6;6;6;6;6;6;6;6;6;6;6;6;6;6;6;6;6;6;6;6;6;6;6;6;6;6;6;6;6;6;6	43427366;43427548;43427554;43427856;43427968;43427968;43430748;43431751;43432142;43432142;43433235;43433235;43434621;43434621;43434621;43434621;43435751;43435751;43435751;43435798;43436093;43436138;43436138;43436138;43437934;43437934;43437934;43437934;43438624;43438624;43438624;43438711;43441862;43441862;43441862;43441862;43441862;43442970;43442970;43442970;43443933;43443933;43444159;43444159;434…	43427389;43427699;43427757;43427967;43428139;43428139;43430866;43433360;43432176;43433360;43433360;43433360;43435156;43434848;43434848;43434848;43435907;43435907;43435907;43435907;43436247;43436247;43436247;43436247;43438795;43438013;43438013;43438013;43438795;43438795;43438795;43438795;43442061;43441960;43441960;43441960;43441897;43444010;43443159;43443159;43444010;43444010;43444353;43444353;434…	+;+;+;+;+;+;+;+;+;+;+;+;+;+;+;+;+;+;+;+;+;+;+;+;+;+;+;+;+;+;+;+;+;+;+;+;+;+;+;+;+;+;+;+;+;+;+;+;+;+;+;+;+;+;+;+;+;+;+;+;+;+;+;+;+;+;+;+;+;+;+;+;+;+;+;+;+;+;+;+;+;+	8083	1.6094	1.64417	1.93595	0.812246	0.720524	0.871026	2.3035e-07	6.79837e-06	1.02706
ABCC5	3;3;3;3;3;3;3;3;3;3;3;3;3;3;3;3;3;3;3;3;3;3;3;3;3;3;3;3;3;3;3;3;3;3;3;3;3;3;3;3;3;3;3;3;3;3;3;3;3;3;3;3;3;3;3;3;3;3;3;3;3;3;3;3;3;3;3;3;3;3;3;3;3;3;3;3;3;3;3;3;3;3;3;3;3;3;3;3;3;3;3;3;3;3;3;3;3;3;3;3;3;3;3;3;3;3;3;3;3;3;3;3;3;3;3;3;3;3;3;3;3;3;3;3;3;3;3;3;3;3;3;3;3;3;3;3;3;3;3;3;3	183919934;183919938;183919939;183925555;183925555;183925555;183925660;183927330;183927330;183927330;183927330;183928747;183928747;183928747;183928747;183937901;183937901;183937901;183937901;183942433;183942727;183942727;183942727;183942727;183945850;183945850;183945850;183947324;183947324;183947324;183949753;183949753;183949972;183949972;183949972;183951441;183951441;183951441;183951857;183951857…	183921401;183921401;183921401;183925719;183925719;183925719;183925719;183927443;183927443;183927443;183927443;183928825;183928825;183928825;183928825;183938060;183938060;183938060;183938060;183942515;183942780;183942916;183942916;183942916;183945939;183945939;183945939;183947510;183947510;183947510;183949881;183949881;183950125;183950125;183950125;183951570;183951570;183951570;183952003;183952003…	-;-;-;-;-;-;-;-;-;-;-;-;-;-;-;-;-;-;-;-;-;-;-;-;-;-;-;-;-;-;-;-;-;-;-;-;-;-;-;-;-;-;-;-;-;-;-;-;-;-;-;-;-;-;-;-;-;-;-;-;-;-;-;-;-;-;-;-;-;-;-;-;-;-;-;-;-;-;-;-;-;-;-;-;-;-;-;-;-;-;-;-;-;-;-;-;-;-;-;-;-;-;-;-;-;-;-;-;-;-;-;-;-;-;-;-;-;-;-;-;-;-;-;-;-;-;-;-;-;-;-;-;-;-;-;-;-;-;-;-;-	11441	14.7473	12.9028	18.3387	5.08961	4.69651	6.0967	1.24452e-08	8.43791e-07	1.45108
AC005281.2	7;7	12570125;12571206	12570848;12571392	-;-	911	0.588301	1.5727	1.48558	0.329722	0.277955	0.307086	0.000677324	0.00298695	1.89364
AC007191.4	19	45714387	45717381	-	2995	0.178946	0.214444	0.254179	0.458482	0.473461	0.66942	0.000315341	0.00162504	-1.37022
AC008069.2	2;2	16853820;16854924	16854408;16855284	-;-	950	2.15403	2.39222	2.58207	0.722712	0.906252	0.392639	2.51071e-05	0.000229529	1.73607
AC008440.5	19;19	53874626;53875823	53874821;53876049	-;-	423	3.2251	1.75194	1.99965	7.10111	7.66237	8.15677	1.62712e-06	2.79686e-05	-1.79762
AC009120.5	16;16	74313337;74315146	74313360;74315634	+;+	513	4.08391	5.39309	7.00755	1.84024	1.77696	3.1811	0.00048708	0.00229242	1.20052
AC010980.2	2;2;2;2;2;2;2;2;2;2;2;2;2;2;2;2;2	222318275;222318471;222318701;222319298;222320674;222320694;222320863;222321106;222321355;222321467;222321467;222321467;222321467;222321467;222342192;222342192;222352980	222319370;222319370;222318898;222319370;222320829;222321264;222321008;222321264;222321538;222321659;222321722;222321722;222321722;222321512;222342693;222342541;222352989	+;+;+;+;+;+;+;+;+;+;+;+;+;+;+;+;+	2567	1.74617	1.48195	1.41689	0.635223	0.512945	0.563071	4.22726e-06	5.81189e-05	1.34585
AC015688.3	17;17;17;17;17;17	27623364;27623446;27638263;27638263;27640572;27640572	27623668;27623795;27638354;27638354;27640661;27640777	+;+;+;+;+;+	730	1.20137	1.2182	2.37534	3.52693	3.53811	3.44904	0.000340971	0.00172325	-1.18869
AC016747.3	2;2;2;2;2;2;2;2;2	61141592;61143555;61143568;61144169;61144406;61144773;61144773;61144773;61144773	61143945;61144266;61143945;61144266;61144642;61144891;61144969;61144950;61144952	-;-;-;-;-;-;-;-;-	3109	0.61118	0.826323	0.489718	0.193231	0.358365	0.344932	0.0037514	0.011888	1.02414
AC019181.2	2;2	164840749;164848842	164840822;164849334	+;+	567	1.03115	1.13273	1.26803	2.19474	2.67955	1.97358	0.00280833	0.00942861	-1.06296
AC027682.1	16;16;16;16;16;16;16;16;16;16;16;16;16;16;16;16;16;16;16;16;16;16	67529823;67538424;67538672;67538990;67539728;67539846;67540053;67540300;67540458;67540579;67541430;67541653;67541867;67543348;67544299;67544695;67544956;67545376;67545664;67545949;67546141;67546366	67529859;67538550;67538824;67539068;67539751;67539899;67540205;67540363;67540501;67540704;67541578;67541782;67543264;67543469;67544431;67544830;67545117;67545534;67545860;67546032;67546231;67546463	+;+;+;+;+;+;+;+;+;+;+;+;+;+;+;+;+;+;+;+;+;+	3720	6.96777	6.52087	7.37847	17.7988	15.8193	17.0836	2.40898e-11	8.97174e-09	-1.36343
AC068831.3	15;15;15;15	90932586;90932602;90934985;90934985	90932806;90932755;90935130;90935054	-;-;-;-	367	3.05342	3.36544	2.76573	1.40308	1.79391	1.01637	0.00711024	0.0200558	1.03646
AC079135.1	2;2;2;2;2;2	236167447;236167465;236213663;236259507;236277372;236294773	236167669;236167669;236214225;236259599;236277452;236294927	+;+;+;+;+;+	1115	0.524363	0.265854	0.379306	1.00062	1.40802	0.919972	0.000484345	0.00228265	-1.57119
AC090587.4	11;11	3854612;3854916	3854654;3855399	+;+	527	2.40374	2.9999	3.21006	0.732826	2.01805	1.23864	0.00686517	0.0194962	1.05457
AC090587.5	11;11	3854318;3855357	3854658;3855509	-;-	494	2.56432	3.2003	3.16766	0.694915	2.05034	1.32138	0.00663037	0.0189429	1.07835
AC112229.1	2	110360608	110363737	-	3130	0.326889	0.347253	0.47292	0.0411288	0.22652	0.20855	0.0111807	0.0286891	1.22463
AC114730.11	2;2	241724615;241725665	241725169;241725693	-;-	584	3.08684	3.80686	3.54852	6.613	5.54997	7.8242	6.68605e-05	0.000486207	-1.01904
AC116609.2	2;2	742488;747658	742912;747767	+;+	535	4.64453	5.5407	5.92887	1.52394	1.79855	2.87599	9.57453e-05	0.000638112	1.29951
AC137934.1	16;16;16;16;16;16;16;16;16;16;16;16;16;16;16;16	90185997;90194121;90214682;90214773;90215293;90215293;90215826;90215872;90216028;90219259;90221448;90222244;90222244;90222386;90222389;90222389	90186154;90194225;90214831;90214831;90216935;90215362;90216198;90216198;90216198;90219464;90221997;90222292;90222292;90222666;90222678;90222508	+;+;+;+;+;+;+;+;+;+;+;+;+;+;+;+	3154	0.386192	0.297618	0.455913	0.0816316	0.0642276	0.0739155	2.78137e-05	0.00024804	2.26428
AC141928.1	4;4	3758748;3760145	3760026;3763390	-;-	4525	3.31633	2.67494	3.21517	0.843996	0.839395	1.18497	7.86393e-09	6.06133e-07	1.59994
AC144568.2	8;8;8;8	72601;72617;78905;78905	72673;72701;79775;79244	+;+;+;+	972	2.20552	2.18559	3.04576	0.529766	0.833637	0.47969	6.42128e-06	7.99058e-05	1.94198
AC159540.1	2;2;2;2;2;2;2;2;2;2;2;2;2;2;2;2;2;2;2;2;2;2;2;2;2;2;2;2;2;2;2;2;2;2;2;2;2;2;2;2;2;2;2;2;2;2;2;2;2;2;2;2;2;2;2;2;2;2;2;2;2;2;2;2;2	97416165;97416165;97416221;97416221;97416224;97416224;97422165;97422439;97422439;97422439;97422439;97422439;97422496;97422557;97422580;97422580;97422955;97422955;97422955;97422955;97422955;97422955;97422955;97422955;97422955;97422955;97422955;97422955;97422955;97423036;97423059;97423177;97423177;97423177;97423177;97423177;97423177;97423177;97423177;97423177;97423177;97423177;97423177;97423177;974…	97416405;97416405;97416405;97416405;97416405;97416405;97422659;97422656;97422497;97422659;97422497;97422656;97423084;97422659;97422659;97422659;97423084;97423084;97423084;97423084;97423084;97423084;97423084;97423084;97423084;97422988;97423084;97423084;97423084;97423084;97423084;97423261;97423272;97423272;97423272;97423261;97423272;97423256;97423272;97423388;97423272;97423272;97423261;97425470;974…	-;-;-;-;-;-;-;-;-;-;-;-;-;-;-;-;-;-;-;-;-;-;-;-;-;-;-;-;-;-;-;-;-;-;-;-;-;-;-;-;-;-;-;-;-;-;-;-;-;-;-;-;-;-;-;-;-;-;-;-;-;-;-;-;-	5278	4.01555	3.10768	5.1764	0.853667	0.863568	1.65196	8.72413e-06	0.000101686	1.79005
ACAP1	17;17;17;17;17;17;17;17;17;17;17;17;17;17;17;17;17;17;17;17;17;17;17;17;17;17;17;17;17;17;17;17;17;17;17;17;17;17;17;17;17;17;17;17;17;17;17;17;17;17;17;17;17;17;17;17;17;17;17;17;17;17;17;17;17;17	7336529;7336580;7336590;7336597;7337263;7337312;7337312;7341948;7341948;7341948;7341948;7342195;7342275;7342275;7342275;7342275;7342416;7342416;7342416;7342416;7342416;7342935;7343379;7343379;7343379;7343379;7343706;7343706;7343706;7343706;7343861;7343861;7343861;7343861;7344049;7344049;7344049;7344539;7344539;7345331;7346244;7346391;7346808;7347031;7347129;7347922;7347922;7348127;7348127;7348306…	7336787;7336787;7336787;7336787;7337369;7337369;7337369;7342067;7342067;7342067;7342067;7342328;7342328;7342328;7342328;7342328;7342753;7342474;7342474;7342474;7342474;7343562;7343561;7343562;7343562;7343562;7343750;7343750;7343750;7343750;7343956;7343956;7343953;7343956;7344123;7344123;7344123;7344647;7344648;7350228;7346295;7346491;7346931;7347242;7347242;7347991;7347991;7348252;7348221;7348475…	+;+;+;+;+;+;+;+;+;+;+;+;+;+;+;+;+;+;+;+;+;+;+;+;+;+;+;+;+;+;+;+;+;+;+;+;+;+;+;+;+;+;+;+;+;+;+;+;+;+;+;+;+;+;+;+;+;+;+;+;+;+;+;+;+;+	7421	0.190397	0.186407	0.182369	0.0693885	0.0750678	0.0502637	0.000336984	0.00170818	1.42938
ACCS	11;11;11;11;11;11;11;11;11;11;11;11;11;11;11;11;11;11;11;11;11;11;11;11;11;11;11;11;11;11;11;11;11;11;11;11;11;11;11;11;11;11;11;11;11;11;11;11;11;11;11;11;11;11;11;11;11;11;11;11;11;11;11;11;11;11;11;11;11;11;11;11	44065925;44066179;44066268;44066524;44066536;44067129;44067628;44067628;44067628;44067628;44067628;44067628;44071256;44071256;44071256;44071256;44071256;44073344;44073447;44073447;44073447;44073447;44074612;44074612;44074612;44074612;44074630;44075526;44075526;44075526;44075526;44075526;44075531;44077279;44077279;44077279;44077323;44077323;44077845;44077845;44078684;44079338;44079338;44079529;440…	44066012;44066322;44066701;44066701;44066701;44067296;44067859;44067915;44067774;44067915;44067915;44067778;44071315;44071315;44071315;44071315;44071315;44073517;44073535;44073517;44073517;44073517;44074681;44074681;44074681;44074681;44074681;44075592;44075856;44075592;44075592;44075592;44075592;44077376;44077445;44077376;44079620;44077699;44078784;44077922;44078784;44079620;44079620;44079620;440…	+;+;+;+;+;+;+;+;+;+;+;+;+;+;+;+;+;+;+;+;+;+;+;+;+;+;+;+;+;+;+;+;+;+;+;+;+;+;+;+;+;+;+;+;+;+;+;+;+;+;+;+;+;+;+;+;+;+;+;+;+;+;+;+;+;+;+;+;+;+;+;+	5826	0.384692	0.474881	0.464594	0.250425	0.139083	0.160061	0.000318428	0.00163614	1.16553
ACKR4	3;3;3;3;3	132597237;132600389;132601388;132605036;132618691	132597323;132602215;132601452;132605117;132618967	+;+;+;+;+	2273	0.900275	0.934623	0.707047	0.283179	0.356487	0.553849	0.00294776	0.00977503	1.0038
ACOT11	1;1;1;1;1;1;1;1;1;1;1;1;1;1;1;1;1;1;1;1;1;1;1;1;1;1;1;1;1;1;1;1;1;1;1;1;1;1;1;1;1;1;1;1;1;1;1;1;1;1;1;1;1;1;1;1;1;1	54542257;54548220;54548228;54548228;54548467;54584655;54584655;54584655;54584655;54585835;54585835;54585835;54592546;54592546;54592546;54592546;54593941;54593941;54593941;54593941;54594556;54594556;54594556;54594556;54597259;54597259;54597259;54597259;54597264;54599296;54599296;54599296;54599296;54601269;54601269;54601269;54602669;54602669;54602669;54603871;54603871;54603871;54604346;54604346;546…	54542437;54548342;54548342;54548342;54548619;54584862;54584862;54584862;54584862;54585904;54585904;54585904;54592606;54592606;54592606;54592606;54594039;54594039;54594039;54594039;54594691;54594691;54594691;54594691;54597415;54597415;54598858;54597415;54597415;54599658;54599415;54599415;54599415;54601413;54601413;54601413;54602724;54602724;54602724;54603937;54603937;54603937;54604429;54604429;546…	+;+;+;+;+;+;+;+;+;+;+;+;+;+;+;+;+;+;+;+;+;+;+;+;+;+;+;+;+;+;+;+;+;+;+;+;+;+;+;+;+;+;+;+;+;+;+;+;+;+;+;+;+;+;+;+;+;+	9768	0.139662	0.166907	0.173188	0.439302	0.466617	0.405733	4.77836e-07	1.16786e-05	-1.52646
ACTA2	10;10;10;10;10;10;10;10;10;10;10;10;10;10;10;10;10;10;10;10;10;10;10;10;10;10;10;10;10;10	88935074;88938061;88939507;88941001;88941229;88941785;88941785;88941785;88941785;88943797;88943797;88943797;88943797;88946820;88947258;88947258;88947258;88947258;88948242;88948802;88948802;88948802;88948802;88948802;88952731;88952731;88952731;88952731;88990939;88991022	88935366;88938242;88939698;88941390;88941390;88941869;88941869;88941869;88941869;88943907;88943907;88943907;88943907;88947386;88947386;88947386;88947386;88947386;88948953;88948953;88948953;88948953;88948953;88948953;88952773;88952773;88952747;88952773;88991339;88991288	-;-;-;-;-;-;-;-;-;-;-;-;-;-;-;-;-;-;-;-;-;-;-;-;-;-;-;-;-;-	2976	3.30707	3.91784	3.87966	1.65819	1.36138	1.59806	1.38643e-07	4.80853e-06	1.17901
ADAMTS19	5;5;5;5;5;5;5;5;5;5;5;5;5;5;5;5;5;5;5;5;5;5;5;5;5;5;5;5;5;5;5;5;5;5;5;5;5	129460265;129460281;129461102;129461676;129509077;129509077;129509077;129526284;129526284;129526284;129527748;129527748;129527748;129528520;129528520;129551864;129596559;129620618;129622198;129641859;129647765;129648798;129654306;129658617;129665499;129679764;129684120;129688100;129694720;129694720;129701388;129701388;129704239;129704239;129734932;129734932;129737067	129460482;129460482;129461757;129461757;129509242;129509242;129509242;129526515;129526515;129526456;129527831;129527831;129527831;129528543;129528677;129551907;129596664;129620758;129622348;129641960;129647895;129648970;129654433;129658737;129665579;129679921;129684273;129688214;129694855;129694855;129701592;129701592;129704391;129704391;129735048;129735109;129738683	+;+;+;+;+;+;+;+;+;+;+;+;+;+;+;+;+;+;+;+;+;+;+;+;+;+;+;+;+;+;+;+;+;+;+;+;+	5408	13.1535	12.4882	13.7248	4.94334	4.98194	6.1731	4.78326e-10	8.40671e-08	1.2083
ADAMTSL4	1;1;1;1;1;1;1;1;1;1;1;1;1;1;1;1;1;1;1;1;1;1;1;1;1;1;1;1;1;1;1;1;1;1;1;1;1;1;1;1;1;1;1;1;1;1;1;1;1;1;1;1;1;1;1;1;1;1;1;1;1;1;1;1;1;1;1;1;1;1;1;1;1;1;1;1;1;1;1	150549369;150549369;150549408;150549421;150549822;150549822;150549822;150549822;150550615;150552088;150552205;150552205;150552205;150552543;150552543;150552543;150552543;150552898;150552898;150552898;150552898;150553426;150553426;150553426;150553426;150554365;150554365;150554365;150554365;150554566;150555429;150555429;150555429;150555429;150556162;150556162;150556162;150556162;150556621;150556621…	150549499;150549499;150549499;150549499;150550276;150549895;150549895;150549895;150551906;150552308;150552308;150552308;150552308;150552600;150552600;150552600;150552600;150553253;150553253;150553253;150553253;150554122;150554122;150554122;150554122;150554467;150554467;150554467;150554467;150554634;150555565;150555565;150555565;150555565;150556366;150556366;150556366;150556366;150556793;150556793…	+;+;+;+;+;+;+;+;+;+;+;+;+;+;+;+;+;+;+;+;+;+;+;+;+;+;+;+;+;+;+;+;+;+;+;+;+;+;+;+;+;+;+;+;+;+;+;+;+;+;+;+;+;+;+;+;+;+;+;+;+;+;+;+;+;+;+;+;+;+;+;+;+;+;+;+;+;+;+	6432	0.0908993	0.268837	0.203836	0.0533719	0.047242	0.0797395	0.00255614	0.00873377	1.54705
ADCY5	3;3;3;3;3;3;3;3;3;3;3;3;3;3;3;3;3;3;3;3;3;3;3;3;3;3;3;3;3;3;3;3;3;3;3;3;3;3;3;3;3;3;3;3;3;3;3;3;3;3;3;3;3;3;3;3;3;3;3;3;3;3;3;3;3;3;3;3;3;3;3;3;3;3;3;3;3;3;3;3;3;3;3;3;3;3;3;3;3;3;3;3;3;3;3;3;3;3;3;3;3;3;3	123282296;123283944;123284446;123284578;123286685;123286685;123286685;123286685;123289750;123289750;123289750;123291113;123291113;123291113;123296084;123296084;123296084;123296980;123297257;123297353;123297353;123297353;123300120;123300120;123300120;123300120;123300220;123300251;123303055;123303055;123303055;123303055;123303055;123303055;123304067;123304067;123304067;123304067;123304067;123304067…	123284736;123284736;123284736;123284736;123287111;123286809;123286809;123286809;123289954;123289954;123289954;123291376;123291376;123291376;123296216;123296216;123296216;123297054;123297382;123297382;123297382;123297382;123300295;123300295;123300295;123300295;123300295;123300295;123303219;123303219;123303219;123303219;123303219;123303219;123304183;123304079;123304183;123304183;123304183;123304183…	-;-;-;-;-;-;-;-;-;-;-;-;-;-;-;-;-;-;-;-;-;-;-;-;-;-;-;-;-;-;-;-;-;-;-;-;-;-;-;-;-;-;-;-;-;-;-;-;-;-;-;-;-;-;-;-;-;-;-;-;-;-;-;-;-;-;-;-;-;-;-;-;-;-;-;-;-;-;-;-;-;-;-;-;-;-;-;-;-;-;-;-;-;-;-;-;-;-;-;-;-;-;-	8873	1.63084	1.49778	1.45853	3.55456	3.29899	3.46817	2.61335e-10	5.09438e-08	-1.25437
ADORA1	1;1;1;1;1;1;1;1;1;1;1;1;1;1;1;1;1;1;1;1;1;1;1;1	203090654;203091693;203127065;203127708;203127829;203128278;203128278;203128306;203128373;203128785;203128785;203128785;203128785;203129634;203150632;203152646;203165056;203165056;203165261;203165261;203165261;203165261;203165261;203165261	203090734;203091710;203127928;203127928;203127928;203128432;203128432;203128432;203128432;203129182;203129182;203129182;203129182;203129698;203150778;203152758;203165741;203166749;203166749;203166062;203166115;203167405;203167404;203167405	+;+;+;+;+;+;+;+;+;+;+;+;+;+;+;+;+;+;+;+;+;+;+;+	4191	0.116254	0.176824	0.121095	0.634809	0.507522	0.734266	5.00475e-07	1.21308e-05	-2.26236
AF131216.5	8;8	11345748;11347297	11346640;11347502	-;-	1099	5.00964	3.77615	3.69435	1.87418	1.52069	1.61218	1.0828e-05	0.000119726	1.2231
AGR2	7;7;7;7;7;7;7;7;7;7;7;7;7;7;7;7;7;7;7;7;7;7;7;7;7;7;7;7;7;7;7;7;7;7;7;7	16791811;16792640;16794674;16794851;16794936;16797631;16797631;16797631;16797631;16799574;16799744;16799744;16799744;16799744;16801151;16801151;16801151;16801151;16801151;16801284;16801320;16801320;16801320;16801320;16801658;16801658;16801658;16801658;16803145;16804935;16804935;16804935;16804935;16804953;16811665;16833256	16792957;16792957;16795019;16795019;16795019;16797694;16797694;16797694;16797694;16799817;16799817;16799817;16799817;16799817;16801203;16801203;16801203;16801196;16801203;16801803;16801383;16801383;16801383;16801383;16801803;16801803;16801803;16801803;16803200;16804999;16804995;16804999;16805080;16804987;16811755;16833433	-;-;-;-;-;-;-;-;-;-;-;-;-;-;-;-;-;-;-;-;-;-;-;-;-;-;-;-;-;-;-;-;-;-;-;-	2845	50.3661	52.5304	47.3915	114.148	109.76	92.9731	1.40656e-09	1.86624e-07	-1.16037
AKAP2	9;9;9;9;9;9;9;9;9;9;9;9;9;9;9;9;9;9;9;9;9;9;9;9;9	110048598;110048696;110048698;110090197;110125501;110127646;110136127;110136127;110136127;110136127;110136127;110138171;110148528;110156319;110156319;110156319;110156319;110156319;110162094;110168399;110168399;110168399;110168399;110168399;110168399	110048855;110048855;110048855;110090416;110125596;110128012;110138539;110138426;110136334;110138539;110138539;110138539;110148703;110156497;110156497;110156497;110156497;110156497;110162132;110168889;110168406;110168633;110168811;110169909;110172512	+;+;+;+;+;+;+;+;+;+;+;+;+;+;+;+;+;+;+;+;+;+;+;+;+	7862	0.756053	0.52157	0.817664	0.261985	0.244779	0.432929	0.000184824	0.0010631	1.07714
AKR1B10	7;7;7;7;7;7;7;7;7;7;7;7;7;7;7;7;7;7;7;7;7;7;7;7;7	134527592;134527620;134530643;134530643;134531908;134531908;134533004;134533004;134535617;134536650;134536709;134537051;134537051;134537580;134537580;134537613;134538145;134538194;134538194;134538935;134538935;134538935;134541047;134541047;134541047	134527977;134527977;134530810;134530810;134532024;134532024;134533081;134533081;134535663;134536772;134536772;134537087;134537157;134537661;134537661;134537661;134538277;134538277;134538277;134539017;134539075;134539017;134541408;134541408;134541408	+;+;+;+;+;+;+;+;+;+;+;+;+;+;+;+;+;+;+;+;+;+;+;+;+	1744	0.419054	0.453253	0.242503	1.23025	1.07443	0.614905	0.00059928	0.00270923	-1.48841
ALDH1A3	15;15;15;15;15;15;15;15;15;15;15;15;15;15;15;15;15;15;15;15;15;15;15;15;15;15;15;15;15;15;15;15;15;15;15;15;15;15;15;15;15;15;15	100877714;100879376;100879813;100879839;100879848;100879875;100885267;100885267;100885267;100885267;100885267;100887572;100887572;100887572;100887572;100887572;100892069;100892510;100892510;100892945;100892945;100892945;100893954;100893954;100895933;100895933;100895933;100898060;100898083;100898083;100900575;100900575;100900575;100905523;100905523;100905523;100907121;100907121;100907121;100908408…	100877865;100880006;100880006;100881508;100880006;100880006;100885371;100885371;100885371;100885371;100885371;100887712;100887712;100887712;100887712;100887712;100892239;100892639;100892639;100893006;100893006;100892987;100894082;100894082;100896046;100896014;100896046;100898185;100898185;100898185;100900759;100900759;100900759;100905687;100905687;100905687;100907278;100907230;100907278;100908482…	+;+;+;+;+;+;+;+;+;+;+;+;+;+;+;+;+;+;+;+;+;+;+;+;+;+;+;+;+;+;+;+;+;+;+;+;+;+;+;+;+;+;+	5772	1.08046	0.787461	0.73272	2.33438	2.49181	2.78689	5.22167e-09	4.46324e-07	-1.63583
ALOX12-AS1	17;17;17;17;17;17;17;17;17;17;17;17;17;17;17;17;17;17;17;17;17;17;17;17;17;17;17;17;17;17;17;17	6876635;6876711;6876788;6880910;6880910;6926161;6985109;6999147;6999310;6999399;7001132;7002280;7002484;7002484;7002484;7009796;7009796;7009796;7009796;7009796;7009796;7009796;7010059;7012196;7012196;7012196;7012196;7012196;7012196;7012196;7012196;7012196	6876827;6876887;6876887;6881062;6881062;6926283;6985540;6999586;6999586;6999586;7002620;7002620;7002620;7002620;7002620;7009889;7009889;7009889;7009889;7009889;7009889;7009889;7010137;7012349;7012342;7012331;7012349;7012338;7012334;7012317;7012338;7012331	-;-;-;-;-;-;-;-;-;-;-;-;-;-;-;-;-;-;-;-;-;-;-;-;-;-;-;-;-;-;-;-	3217	0.923856	0.967513	1.19634	0.400165	0.409304	0.637718	0.000341459	0.00172516	1.01447
AMZ1	7;7;7;7;7;7;7;7;7;7;7;7;7;7;7;7;7;7;7;7;7;7;7;7;7;7;7	2679522;2688202;2700234;2700234;2702021;2702476;2702530;2702722;2702722;2702722;2702722;2708588;2708588;2708588;2708588;2708588;2709075;2709075;2709075;2709640;2709640;2709640;2712330;2712330;2764608;2764712;2775289	2679671;2688296;2700755;2700755;2702444;2702889;2702605;2702889;2702889;2702889;2702889;2708716;2708716;2708716;2708716;2708716;2709114;2709189;2709244;2709816;2709816;2709816;2713100;2716529;2764939;2765125;2775500	+;+;+;+;+;+;+;+;+;+;+;+;+;+;+;+;+;+;+;+;+;+;+;+;+;+;+	7011	0.514253	0.704672	0.67562	0.275424	0.173362	0.299267	2.7196e-05	0.000243503	1.24694
ANGPTL4	19;19;19;19;19;19;19;19;19;19;19;19;19;19;19;19;19;19;19;19;19;19;19;19;19;19;19;19;19;19;19;19;19;19;19;19;19;19;19;19;19;19;19;19;19;19;19;19;19;19;19;19;19;19	8363289;8363299;8363299;8363411;8363774;8363777;8364151;8364156;8364166;8364169;8364169;8364169;8364206;8364206;8364206;8364398;8364622;8365954;8365954;8365954;8365954;8365954;8365954;8365954;8365954;8366202;8366202;8366202;8366202;8366202;8366202;8366202;8369219;8369219;8369219;8369219;8369219;8371056;8371056;8371056;8371056;8371056;8371056;8371056;8371241;8371241;8371241;8371241;8373705;8373705…	8363362;8363362;8363362;8363850;8363850;8363850;8364639;8364551;8364639;8364639;8364639;8364639;8364578;8364635;8364609;8364639;8364639;8366064;8366064;8366064;8366064;8366064;8366064;8366064;8366064;8366319;8366319;8366319;8366319;8366319;8366319;8366319;8369332;8369332;8369332;8369332;8369332;8371151;8371262;8371151;8371151;8371261;8371151;8371230;8371522;8371522;8371522;8371522;8373955;8374331…	+;+;+;+;+;+;+;+;+;+;+;+;+;+;+;+;+;+;+;+;+;+;+;+;+;+;+;+;+;+;+;+;+;+;+;+;+;+;+;+;+;+;+;+;+;+;+;+;+;+;+;+;+;+	2482	0.137411	0.218957	0.238556	0.708844	0.652938	0.619925	2.67353e-05	0.000240465	-1.7985
ANGPTL8	19;19;19;19;19;19;19;19;19;19;19;19;19;19;19;19;19	11237450;11237502;11238057;11239618;11239619;11239897;11240135;11240135;11240135;11241445;11241445;11241445;11241445;11241660;11241660;11241660;11241660	11237574;11237574;11238281;11239934;11239934;11239934;11240296;11240296;11240296;11241554;11241554;11241554;11241554;11241943;11241943;11241818;11241943	+;+;+;+;+;+;+;+;+;+;+;+;+;+;+;+;+	1223	1.03579	0.848321	1.21034	0.456127	0.414092	0.381242	0.00152361	0.00575661	1.21784
ANKRD2	10;10;10;10;10;10;10;10;10;10;10;10;10;10;10;10;10;10;10;10;10;10;10;10;10;10;10;10;10;10;10;10;10;10	97572499;97572499;97572499;97572779;97577800;97577800;97577800;97577800;97578240;97578240;97578240;97578240;97578498;97578498;97578498;97578498;97580855;97580855;97580855;97580855;97581316;97581316;97581316;97581316;97582315;97582315;97582604;97582604;97582604;97582604;97583576;97583576;97583576;97583576	97572875;97572875;97572875;97572875;97577901;97577901;97577901;97577901;97578398;97578398;97578398;97578398;97578605;97578605;97578605;97578605;97580953;97580953;97580953;97580953;97581414;97581414;97581414;97581414;97582413;97582413;97582702;97582702;97582702;97582702;97583884;97583884;97583882;97583882	+;+;+;+;+;+;+;+;+;+;+;+;+;+;+;+;+;+;+;+;+;+;+;+;+;+;+;+;+;+;+;+;+;+	1451	0.402939	0.272389	0.437208	0.828055	1.25649	1.18894	0.000122563	0.000771483	-1.6096
ANKRD36	2;2;2;2;2;2;2;2;2;2;2;2;2;2;2;2;2;2;2;2;2;2;2;2;2;2;2;2;2;2;2;2;2;2;2;2;2;2;2;2;2;2;2;2;2;2;2;2;2;2;2;2;2;2;2;2;2;2;2;2;2;2;2;2;2;2;2;2;2;2;2;2;2;2;2;2;2;2;2;2;2;2;2;2;2;2;2;2;2;2;2;2;2;2;2;2;2;2;2;2;2;2;2;2;2;2;2;2;2;2;2;2;2;2;2;2;2;2;2;2;2;2;2;2;2;2;2;2;2;2;2;2;2;2;2;2;2;2;2;2;2;2;2;2;2;2;2;2;2;2;2;2;2;2;2;2;2;2;2;2;2;2;2;2;2;2;2;2;2;2;2;2;2;2;2;2;2;2;2;2;2;2;2;2;2;2;2;2	97113496;97113496;97113552;97113657;97118064;97118064;97118064;97118064;97118344;97118344;97118344;97118344;97122887;97122887;97122887;97124460;97124460;97124460;97127067;97127067;97127067;97142640;97142640;97142640;97142763;97142763;97144518;97144518;97144640;97144640;97146486;97146486;97149295;97149295;97151879;97151879;97152504;97152504;97154675;97154675;97158107;97158107;97158588;97158588;971…	97113936;97113936;97113936;97113936;97118178;97118178;97118178;97118178;97118829;97118517;97118517;97118517;97122993;97122993;97122993;97124597;97124597;97124597;97127134;97127134;97127134;97142665;97142668;97142668;97142835;97142835;97144546;97144546;97144712;97144712;97146516;97146516;97149361;97149361;97151939;97151939;97152534;97152534;97154741;97154741;97158167;97158167;97158655;97158655;971…	+;+;+;+;+;+;+;+;+;+;+;+;+;+;+;+;+;+;+;+;+;+;+;+;+;+;+;+;+;+;+;+;+;+;+;+;+;+;+;+;+;+;+;+;+;+;+;+;+;+;+;+;+;+;+;+;+;+;+;+;+;+;+;+;+;+;+;+;+;+;+;+;+;+;+;+;+;+;+;+;+;+;+;+;+;+;+;+;+;+;+;+;+;+;+;+;+;+;+;+;+;+;+;+;+;+;+;+;+;+;+;+;+;+;+;+;+;+;+;+;+;+;+;+;+;+;+;+;+;+;+;+;+;+;+;+;+;+;+;+;+;+;+;+;+;+;+;+;+;+;+;+;+;+;+;+;+;+;+;+;+;+;+;+;+;+;+;+;+;+;+;+;+;+;+;+;+;+;+;+;+;+;+;+;+;+;+;+	9670	1.00266	1.22106	2.15618	0.474817	0.570852	0.626821	0.00024108	0.00131393	1.31755
ANKRD36C	2;2;2;2;2;2;2;2;2;2;2;2;2;2;2;2;2;2;2;2;2;2;2;2;2;2;2;2;2;2;2;2;2;2;2;2;2;2;2;2;2;2;2;2;2;2;2;2;2;2;2;2;2;2;2;2;2;2;2;2;2;2;2;2;2;2;2;2;2;2;2;2;2;2;2;2;2;2;2;2;2;2;2;2;2;2;2;2;2;2;2;2;2;2;2;2;2;2;2;2;2;2;2;2;2;2;2;2;2;2;2;2;2;2;2;2;2;2;2;2;2;2;2;2;2;2;2;2;2;2;2;2;2;2;2;2;2;2;2;2;2;2;2;2;2;2;2;2;2;2;2;2;2;2;2;2;2;2;2;2;2;2;2;2;2;2;2;2;2;2;2;2;2;2;2;2;2;2;2;2;2;2;2;2;2;2;2;2;2;2;2;2;2;2;2;2;2;2;2;2…	95836919;95851166;95851166;95851694;95851694;95852126;95852126;95852290;95853709;95853709;95855266;95855266;95855266;95856008;95857309;95857309;95857309;95857458;95857479;95859861;95859861;95859861;95859861;95859861;95867440;95867440;95876439;95876439;95876439;95876439;95880427;95880427;95880427;95880427;95880595;95880595;95880595;95880595;95882302;95882302;95882302;95882302;95882469;95882469;958…	95837108;95851195;95851195;95851787;95851787;95852196;95852196;95853861;95853861;95853861;95856180;95856180;95855377;95856180;95857492;95857492;95857492;95857492;95857492;95860074;95860074;95859929;95860074;95860074;95867581;95867581;95876509;95876509;95876509;95876509;95880499;95880499;95880499;95880499;95880623;95880623;95880623;95880623;95882374;95882374;95882374;95882374;95882497;95882497;958…	-;-;-;-;-;-;-;-;-;-;-;-;-;-;-;-;-;-;-;-;-;-;-;-;-;-;-;-;-;-;-;-;-;-;-;-;-;-;-;-;-;-;-;-;-;-;-;-;-;-;-;-;-;-;-;-;-;-;-;-;-;-;-;-;-;-;-;-;-;-;-;-;-;-;-;-;-;-;-;-;-;-;-;-;-;-;-;-;-;-;-;-;-;-;-;-;-;-;-;-;-;-;-;-;-;-;-;-;-;-;-;-;-;-;-;-;-;-;-;-;-;-;-;-;-;-;-;-;-;-;-;-;-;-;-;-;-;-;-;-;-;-;-;-;-;-;-;-;-;-;-;-;-;-;-;-;-;-;-;-;-;-;-;-;-;-;-;-;-;-;-;-;-;-;-;-;-;-;-;-;-;-;-;-;-;-;-;-;-;-;-;-;-;-;-;-;-;-;-;-…	8574	0.693269	1.13514	1.7215	0.33532	0.419371	0.527491	0.000468624	0.00222262	1.40003
ANKS1B	12;12;12;12;12;12;12;12;12;12;12;12;12;12;12;12;12;12;12;12;12;12;12;12;12;12;12;12;12;12;12;12;12;12;12;12;12;12;12;12;12;12;12;12;12;12;12;12;12;12;12;12;12;12;12;12;12;12;12;12;12;12;12;12;12;12;12;12;12;12;12;12;12;12;12;12;12;12;12;12;12;12;12;12;12;12;12;12;12;12;12;12;12;12;12;12;12;12;12;12;12;12;12;12;12;12;12;12;12;12;12;12;12;12;12;12;12;12;12;12;12;12;12;12;12;12;12;12;12;12;12;12;12;…	98726457;98734684;98734791;98735132;98735422;98735518;98735560;98743974;98743974;98744216;98745351;98745400;98745400;98745460;98745524;98745739;98745833;98751355;98751355;98751355;98751355;98751355;98751355;98751355;98751355;98751355;98751355;98751355;98751355;98751355;98751355;98772994;98773042;98773042;98773042;98773042;98773042;98773042;98773042;98773042;98773042;98773042;98773042;98773042;987…	98726709;98735634;98735634;98735634;98735634;98735634;98735634;98745846;98745849;98745849;98745846;98745849;98745846;98745849;98745839;98745849;98745865;98751522;98751522;98751522;98751522;98751522;98751522;98751522;98751522;98751522;98751522;98751522;98751522;98751436;98751522;98773179;98773179;98773179;98773179;98773179;98773179;98773179;98773179;98773179;98773179;98773179;98773179;98773179;987…	-;-;-;-;-;-;-;-;-;-;-;-;-;-;-;-;-;-;-;-;-;-;-;-;-;-;-;-;-;-;-;-;-;-;-;-;-;-;-;-;-;-;-;-;-;-;-;-;-;-;-;-;-;-;-;-;-;-;-;-;-;-;-;-;-;-;-;-;-;-;-;-;-;-;-;-;-;-;-;-;-;-;-;-;-;-;-;-;-;-;-;-;-;-;-;-;-;-;-;-;-;-;-;-;-;-;-;-;-;-;-;-;-;-;-;-;-;-;-;-;-;-;-;-;-;-;-;-;-;-;-;-;-;-;-;-;-;-;-;-;-;-;-;-;-;-;-;-;-;-;-;-;-;-;-;-;-;-;-;-;-;-;-;-;-;-;-;-;-;-;-;-;-;-;-;-;-;-;-;-;-;-;-;-;-;-;-;-;-;-;-;-;-;-;-;-;-;-;-;-…	11053	0.233626	0.156443	0.145401	0.0815282	0.100801	0.0632759	0.00251382	0.00860795	1.03607
ANXA6	5;5;5;5;5;5;5;5;5;5;5;5;5;5;5;5;5;5;5;5;5;5;5;5;5;5;5;5;5;5;5;5;5;5;5;5;5;5;5;5;5;5;5;5;5;5;5;5;5;5;5;5;5;5;5;5;5;5;5;5;5;5;5;5;5;5;5;5;5;5;5;5;5;5;5;5;5;5;5;5;5;5;5;5;5;5;5;5;5;5;5;5;5;5;5;5;5;5;5;5;5;5;5;5;5;5;5;5;5;5;5;5;5;5;5;5;5;5;5;5;5;5;5;5;5;5;5;5;5;5;5;5;5;5;5;5;5;5;5;5;5;5;5;5;5;5;5;5;5;5;5;5;5	151100712;151101105;151101109;151101109;151101144;151101459;151101480;151103570;151103570;151103570;151103570;151103570;151103570;151105245;151105245;151105245;151105245;151105245;151108455;151108455;151108455;151108455;151109753;151109753;151109753;151109753;151110627;151110627;151110627;151117127;151117127;151117127;151117127;151117758;151117758;151117758;151117758;151119300;151119300;151119300…	151100962;151101507;151101507;151101507;151101507;151101507;151101507;151103692;151103692;151103692;151103692;151103692;151103692;151105303;151105303;151105303;151105303;151105272;151108550;151108550;151108550;151108550;151109846;151109846;151109846;151109846;151110644;151110644;151110644;151117180;151117180;151117180;151117180;151117837;151117837;151117837;151117837;151119390;151119390;151119390…	-;-;-;-;-;-;-;-;-;-;-;-;-;-;-;-;-;-;-;-;-;-;-;-;-;-;-;-;-;-;-;-;-;-;-;-;-;-;-;-;-;-;-;-;-;-;-;-;-;-;-;-;-;-;-;-;-;-;-;-;-;-;-;-;-;-;-;-;-;-;-;-;-;-;-;-;-;-;-;-;-;-;-;-;-;-;-;-;-;-;-;-;-;-;-;-;-;-;-;-;-;-;-;-;-;-;-;-;-;-;-;-;-;-;-;-;-;-;-;-;-;-;-;-;-;-;-;-;-;-;-;-;-;-;-;-;-;-;-;-;-;-;-;-;-;-;-;-;-;-;-;-;-	5427	11.0426	12.0257	10.7076	2.75162	2.32361	2.52589	3.55638e-13	6.63939e-10	2.06618
AOX1	2;2;2;2;2;2;2;2;2;2;2;2;2;2;2;2;2;2;2;2;2;2;2;2;2;2;2;2;2;2;2;2;2;2;2;2;2;2;2;2;2;2;2;2;2;2;2;2;2;2;2;2;2;2;2;2;2;2;2;2;2;2;2;2;2;2;2;2;2;2;2;2;2;2;2;2;2;2;2;2;2;2;2;2;2;2;2;2;2;2;2;2;2;2;2;2;2;2;2;2;2;2;2;2;2;2	200585868;200588174;200593146;200593146;200595272;200595272;200597397;200597397;200599620;200599620;200602284;200602284;200603267;200603267;200604017;200604696;200605536;200608984;200609209;200609220;200609243;200609321;200611384;200611384;200612609;200612609;200612609;200612609;200613804;200613804;200613804;200613804;200615971;200615971;200615971;200620650;200620650;200621120;200621120;200621120…	200586153;200588270;200593203;200593203;200595368;200595368;200597505;200597505;200599746;200599746;200602345;200602345;200603297;200603356;200604097;200604840;200605628;200609135;200609414;200609414;200609414;200609414;200611493;200611493;200612793;200612793;200612793;200612793;200613966;200613967;200613966;200613966;200616063;200616063;200616063;200620819;200620819;200621246;200621246;200621246…	+;+;+;+;+;+;+;+;+;+;+;+;+;+;+;+;+;+;+;+;+;+;+;+;+;+;+;+;+;+;+;+;+;+;+;+;+;+;+;+;+;+;+;+;+;+;+;+;+;+;+;+;+;+;+;+;+;+;+;+;+;+;+;+;+;+;+;+;+;+;+;+;+;+;+;+;+;+;+;+;+;+;+;+;+;+;+;+;+;+;+;+;+;+;+;+;+;+;+;+;+;+;+;+;+;+	5556	0.0613848	0.0978133	0.182689	0.463402	0.428409	0.394423	1.22055e-05	0.000131941	-1.95446
AP003068.18	11;11	65174117;65175035	65176470;65175487	-;-	2354	0.600229	0.293825	0.467123	0.145832	0.258166	0.217878	0.0124774	0.0314285	1.058
APBA1	9;9;9;9;9;9;9;9;9;9;9;9;9;9;9;9;9	69427530;69432536;69440996;69449584;69452122;69456247;69456279;69457053;69457053;69458156;69460673;69467823;69467823;69471656;69476048;69516011;69672153	69431398;69432676;69441115;69449796;69452301;69456432;69456432;69457139;69457139;69458188;69465522;69467948;69467968;69471695;69476143;69517279;69672306	-;-;-;-;-;-;-;-;-;-;-;-;-;-;-;-;-	11384	0.243953	0.234351	0.245196	0.0980048	0.115665	0.114681	0.000133554	0.000826038	1.05844
APOBR	16;16;16;16;16;16;16;16;16	28494649;28494649;28495099;28495099;28496117;28498081;28498081;28498436;28498436	28494738;28494738;28497996;28496089;28497996;28498349;28498349;28498970;28498970	+;+;+;+;+;+;+;+;+	3792	3.53337	3.55682	4.02627	1.22215	1.10849	1.54928	9.32794e-09	6.72165e-07	1.43522
AQP11	11;11;11;11;11;11;11	77589391;77589635;77590529;77603556;77603556;77609298;77609298	77589680;77590611;77590611;77603672;77603672;77610009;77610355	+;+;+;+;+;+;+	2396	0.915063	0.886643	0.706053	0.268642	0.232503	0.175139	1.80012e-05	0.000177426	1.7858
AQP3	9;9;9;9;9;9;9;9;9;9;9;9;9;9;9;9;9;9;9;9	33441154;33441156;33441183;33442301;33442301;33442304;33442381;33442852;33442852;33442852;33442852;33443179;33443321;33443766;33443766;33443766;33447423;33447423;33447423;33447423	33442211;33443892;33442211;33442518;33442518;33442518;33442518;33443458;33443109;33442970;33442970;33443458;33443458;33443892;33443892;33443892;33447582;33447509;33447611;33447596	-;-;-;-;-;-;-;-;-;-;-;-;-;-;-;-;-;-;-;-	2928	19.5687	17.6662	16.8997	43.0576	40.8884	41.9442	2.07353e-11	7.91077e-09	-1.301
AREG	4;4;4;4;4;4;4;4;4;4;4;4;4	74445134;74445302;74446534;74446534;74448639;74449047;74449047;74450380;74450380;74450380;74452544;74454759;74454759	74445406;74445406;74446782;74446782;74449248;74449248;74449248;74450532;74450532;74450532;74452655;74455005;74455009	+;+;+;+;+;+;+;+;+;+;+;+;+	1648	28.7957	25.9914	28.2806	67.8036	74.2136	73.0793	2.69685e-12	2.81227e-09	-1.45544
ARHGAP24	4;4;4;4;4;4;4;4;4;4;4;4;4;4;4;4;4;4;4;4;4;4;4;4;4;4;4;4;4;4;4;4;4;4;4;4;4;4;4;4;4;4;4;4;4;4;4;4;4;4;4;4;4;4;4;4;4;4;4;4;4;4	85475114;85475238;85475443;85475486;85570522;85570522;85570522;85570522;85570593;85604153;85686603;85721885;85721885;85721885;85721885;85721885;85723281;85778706;85827745;85827893;85923648;85923648;85923648;85923648;85923648;85923734;85924697;85930273;85942066;85942066;85942066;85942066;85942066;85942066;85942066;85942066;85942066;85972036;85972036;85972036;85972036;85972036;85972036;85972036;859…	85475559;85475559;85475559;85475559;85570721;85570932;85570721;85570721;85570721;85604303;85686667;85722386;85721972;85721972;85721972;85721972;85723732;85778965;85827975;85827975;85923770;85923770;85923770;85923770;85923770;85923770;85924740;85931042;85942273;85942450;85942273;85942273;85942273;85942273;85942205;85942273;85942273;85972168;85972168;85972168;85972168;85972168;85972168;85972367;859…	+;+;+;+;+;+;+;+;+;+;+;+;+;+;+;+;+;+;+;+;+;+;+;+;+;+;+;+;+;+;+;+;+;+;+;+;+;+;+;+;+;+;+;+;+;+;+;+;+;+;+;+;+;+;+;+;+;+;+;+;+;+	7908	1.78056	1.53687	1.34237	0.613169	0.422669	0.459891	5.10155e-08	2.31972e-06	1.54317
ARHGAP45	19;19;19;19;19;19;19;19;19;19;19;19;19;19;19;19;19;19;19;19;19;19;19;19;19;19;19;19;19;19;19;19;19;19;19;19;19;19;19;19;19;19;19;19;19;19;19;19;19;19;19;19;19;19;19;19;19;19;19;19;19;19;19;19;19;19;19;19;19;19;19;19;19;19;19;19;19;19;19;19;19;19;19;19;19;19;19;19;19;19;19;19;19;19;19;19;19;19;19;19;19;19;19;19;19;19;19;19;19;19;19;19;19;19;19;19;19;19;19;19;19;19;19;19;19;19;19;19;19;19;19;19;19;…	1065923;1066509;1067166;1067317;1067319;1067327;1067498;1068333;1068414;1068414;1068414;1068414;1071221;1071513;1073149;1073149;1073149;1073149;1073149;1073149;1073149;1073149;1073506;1073506;1073506;1073506;1073506;1073506;1073506;1073583;1073674;1073674;1073674;1073674;1073674;1073674;1073948;1073948;1073948;1073948;1073948;1073948;1073948;1074104;1074104;1074104;1074104;1074104;1074104;1074104…	1066163;1066641;1067495;1067495;1067495;1067495;1067674;1068744;1068744;1068744;1068744;1068744;1071358;1071766;1073292;1073292;1073292;1073292;1073292;1073223;1073292;1073292;1073549;1073590;1073590;1073590;1073590;1073590;1073590;1073746;1073746;1073746;1073746;1073746;1073746;1073746;1074014;1074014;1074014;1074014;1074014;1074014;1074014;1074241;1074241;1074241;1074241;1074241;1074241;1074241…	+;+;+;+;+;+;+;+;+;+;+;+;+;+;+;+;+;+;+;+;+;+;+;+;+;+;+;+;+;+;+;+;+;+;+;+;+;+;+;+;+;+;+;+;+;+;+;+;+;+;+;+;+;+;+;+;+;+;+;+;+;+;+;+;+;+;+;+;+;+;+;+;+;+;+;+;+;+;+;+;+;+;+;+;+;+;+;+;+;+;+;+;+;+;+;+;+;+;+;+;+;+;+;+;+;+;+;+;+;+;+;+;+;+;+;+;+;+;+;+;+;+;+;+;+;+;+;+;+;+;+;+;+;+;+;+;+;+;+;+;+;+;+;+;+;+;+;+;+;+;+;+;+;+;+;+;+;+;+;+;+;+;+;+;+;+;+;+;+;+;+;+;+;+;+;+;+;+;+;+	6238	0.952883	0.625675	0.555946	1.26573	1.37203	1.47247	2.20258e-05	0.000206421	-1.03359
ARL4A	7;7;7;7;7;7;7;7;7;7;7;7;7	12686856;12686908;12686908;12687125;12687286;12687635;12687635;12688166;12688166;12688166;12688166;12688169;12688169	12687043;12687043;12687043;12687728;12687728;12687728;12687728;12690934;12688406;12689179;12689176;12688914;12689176	+;+;+;+;+;+;+;+;+;+;+;+;+	3561	10.5763	10.3776	9.65568	4.49475	4.15274	3.99351	6.73701e-10	1.0538e-07	1.19071
ARPIN	15;15;15;15;15;15;15;15;15;15;15;15;15;15	89895006;89900875;89902849;89903216;89903216;89903777;89903777;89903777;89908280;89908280;89910744;89910744;89912052;89912744	89901803;89901803;89903379;89903379;89903379;89903943;89903983;89903983;89908412;89908412;89910819;89910819;89912687;89912956	-;-;-;-;-;-;-;-;-;-;-;-;-;-	8594	1.35496	1.36245	1.59446	0.539259	0.595182	0.6836	1.02731e-07	3.8721e-06	1.16676
ARRDC3	5;5;5;5;5;5;5;5;5;5;5;5;5;5;5;5;5;5;5;5;5;5;5;5;5;5;5	91368724;91370798;91373684;91373684;91374114;91374225;91374922;91374922;91375000;91375511;91375511;91375521;91375527;91376559;91376621;91376621;91376621;91378694;91378694;91378694;91378694;91378694;91379882;91379923;91380780;91382813;91382813	91371456;91371456;91373845;91373838;91374276;91374276;91375344;91375178;91375178;91375613;91375613;91375613;91375613;91376768;91376768;91376768;91376768;91378775;91378775;91378775;91378775;91378775;91380151;91380089;91381020;91382875;91383359	-;-;-;-;-;-;-;-;-;-;-;-;-;-;-;-;-;-;-;-;-;-;-;-;-;-;-	4934	8.11705	8.97173	8.23737	2.75695	2.95608	3.27912	7.37949e-11	2.13759e-08	1.41225
ARSA	22;22;22;22;22;22;22;22;22;22;22;22;22;22;22;22;22;22;22;22;22;22;22;22;22;22;22;22;22;22;22;22;22;22;22;22;22;22;22;22;22;22;22;22;22;22;22;22;22;22	50622754;50622754;50623774;50625018;50625018;50625028;50625029;50625033;50625363;50625579;50625579;50625579;50625579;50625579;50625579;50625936;50625936;50625936;50625936;50625936;50626154;50626154;50626154;50626154;50626154;50626591;50626591;50626591;50626591;50626591;50626591;50626834;50626834;50626834;50626834;50626834;50627166;50627166;50627166;50627166;50627166;50627556;50627556;50627556;506…	50623326;50623027;50623895;50625464;50625464;50625464;50625464;50625464;50625464;50625681;50625681;50625681;50625681;50625656;50625681;50626063;50626063;50626063;50626063;50626063;50626278;50626278;50626278;50626278;50626278;50626760;50627406;50626760;50626760;50626760;50626760;50627052;50627052;50627052;50627052;50627052;50627406;50627406;50627406;50627406;50627406;50628170;50627792;50627792;506…	-;-;-;-;-;-;-;-;-;-;-;-;-;-;-;-;-;-;-;-;-;-;-;-;-;-;-;-;-;-;-;-;-;-;-;-;-;-;-;-;-;-;-;-;-;-;-;-;-;-	2932	0.797632	0.977308	1.55784	0.512239	0.362726	0.620194	0.00114644	0.00458634	1.07586
ASB9	X;X;X;X;X;X;X;X;X;X;X;X;X;X;X;X;X;X;X;X;X;X;X;X;X;X;X;X;X;X;X;X;X;X;X;X;X;X;X;X;X;X;X;X;X;X;X;X;X;X;X;X;X;X;X;X	15235288;15236528;15243987;15243987;15243987;15243989;15244290;15248683;15248683;15248683;15248744;15248744;15248744;15250430;15250430;15250430;15250430;15250430;15250430;15250466;15250470;15250530;15252254;15252254;15252254;15252254;15252254;15252254;15252254;15252254;15252254;15254737;15254737;15254737;15254737;15254737;15254737;15254737;15254737;15254737;15258866;15258866;15258866;15258866;152…	15235340;15236600;15244630;15244630;15244630;15244630;15244630;15248935;15248935;15248935;15248935;15248935;15248935;15250564;15250564;15250564;15250564;15250564;15250534;15250534;15250564;15250564;15252404;15252404;15252317;15252404;15252404;15252404;15252404;15252404;15252404;15254844;15254844;15254844;15254844;15254844;15254844;15254844;15254765;15254844;15258974;15258945;15258945;15259124;152…	-;-;-;-;-;-;-;-;-;-;-;-;-;-;-;-;-;-;-;-;-;-;-;-;-;-;-;-;-;-;-;-;-;-;-;-;-;-;-;-;-;-;-;-;-;-;-;-;-;-;-;-;-;-;-;-	2363	0.597943	0.836303	0.805403	1.5254	2.12175	1.71665	7.64428e-06	9.17666e-05	-1.33151
ASCC2	22;22;22;22;22;22;22;22;22;22;22;22;22;22;22;22;22;22;22;22;22;22;22;22;22;22;22;22;22;22;22;22;22;22;22;22;22;22;22;22;22;22;22;22;22;22;22;22;22;22;22;22;22;22;22;22;22;22;22;22;22;22;22;22;22;22;22;22;22;22;22;22;22;22;22;22;22;22;22;22;22;22;22;22;22;22;22;22;22;22;22;22;22;22;22;22;22;22;22;22;22;22;22;22;22;22;22;22;22;22;22;22;22;22;22;22;22;22;22;22;22;22;22;22;22;22;22;22;22;22;22;22;22;…	29788608;29788609;29788611;29788613;29788616;29788642;29790469;29790469;29790469;29790469;29790469;29792433;29792433;29792433;29792433;29792433;29793360;29793360;29793360;29793360;29793360;29793577;29793577;29793577;29793577;29793577;29793587;29799195;29800991;29800991;29800991;29800991;29800991;29800991;29801994;29801994;29801994;29801994;29802062;29802115;29804638;29804638;29804638;29804638;298…	29789184;29789184;29789184;29788852;29789184;29789184;29790548;29790548;29790548;29790548;29790548;29792535;29792535;29792535;29792535;29792535;29793490;29793490;29793676;29793490;29793490;29793676;29793676;29793676;29793676;29793676;29793676;29799302;29801110;29801110;29801110;29801110;29801110;29801110;29802208;29802208;29802208;29802208;29802102;29802208;29804830;29804830;29804824;29804830;298…	-;-;-;-;-;-;-;-;-;-;-;-;-;-;-;-;-;-;-;-;-;-;-;-;-;-;-;-;-;-;-;-;-;-;-;-;-;-;-;-;-;-;-;-;-;-;-;-;-;-;-;-;-;-;-;-;-;-;-;-;-;-;-;-;-;-;-;-;-;-;-;-;-;-;-;-;-;-;-;-;-;-;-;-;-;-;-;-;-;-;-;-;-;-;-;-;-;-;-;-;-;-;-;-;-;-;-;-;-;-;-;-;-;-;-;-;-;-;-;-;-;-;-;-;-;-;-;-;-;-;-;-;-;-;-;-;-;-;-;-;-;-;-;-;-;-;-;-;-;-;-;-;-;-;-;-;-;-;-;-;-;-;-;-;-;-;-	5416	10.4083	9.03987	9.55019	17.6683	17.4204	19.8435	1.08979e-09	1.5803e-07	-1.00409
ASCL1	12;12	102957686;102959362	102959002;102960516	+;+	2472	0.610996	0.699499	0.838324	0.190947	0.245842	0.35837	0.000380174	0.00188544	1.35721
ASH1L-AS1	1;1;1;1	155562042;155562073;155562981;155563250	155562286;155562286;155563646;155563944	+;+;+;+	1209	1.85377	2.20666	1.81904	0.851831	0.712108	0.694182	7.80408e-05	0.000545937	1.28398
ASPHD1	16;16;16;16;16;16;16;16;16;16;16;16;16;16;16;16;16;16;16;16	29900375;29900379;29900720;29900858;29900858;29901552;29901552;29904852;29904852;29904852;29904852;29904852;29905788;29905788;29905788;29905788;29905788;29906079;29919531;29919531	29900566;29900741;29901920;29901920;29901920;29901920;29901920;29904965;29904965;29904965;29904965;29904965;29905959;29905959;29906056;29906056;29905887;29906127;29919864;29919632	+;+;+;+;+;+;+;+;+;+;+;+;+;+;+;+;+;+;+;+	2312	5.79522	4.89345	5.32316	11.2289	10.4704	12.806	2.98902e-09	3.07594e-07	-1.19011
ATOH8	2;2;2;2;2;2;2;2;2;2;2;2;2;2;2	85751344;85753894;85754647;85760749;85763991;85763991;85763991;85763991;85772618;85780373;85780965;85781034;85786885;85786885;85786885	85751862;85754957;85754957;85760902;85764182;85764182;85764182;85764182;85775213;85780538;85781167;85781166;85788066;85788039;85788066	+;+;+;+;+;+;+;+;+;+;+;+;+;+;+	6076	0.152357	0.121967	0.104409	0.748612	0.725145	0.644597	4.82701e-09	4.27024e-07	-2.56838
ATP2A1-AS1	16;16;16;16	28878957;28878957;28879489;28879542	28879107;28879107;28879895;28879920	-;-;-;-	583	1.755	3.38968	2.39392	4.56344	6.77563	3.19903	0.00396579	0.0124394	-1.02382
ATP6V0A4	7;7;7;7;7;7;7;7;7;7;7;7;7;7;7;7;7;7;7;7;7;7;7;7;7;7;7;7;7;7;7;7;7;7;7;7;7;7;7;7;7;7;7;7;7;7;7;7;7;7;7;7;7;7;7;7;7;7;7;7;7;7;7;7;7;7;7;7;7;7;7;7;7;7;7;7;7;7;7;7;7	138706295;138706295;138706526;138709624;138709624;138709624;138715764;138715764;138715764;138721897;138721897;138721897;138728761;138728761;138728761;138732877;138732877;138732877;138734136;138734136;138734136;138734188;138739540;138739540;138739540;138745123;138745123;138745123;138745125;138747425;138747425;138747425;138747425;138747425;138749167;138749167;138749167;138749167;138752625;138752625…	138706717;138706717;138706717;138709795;138709795;138709795;138715881;138715881;138715881;138722025;138722025;138722025;138728862;138728862;138728862;138733093;138733093;138733093;138734254;138734254;138734254;138734254;138739633;138739633;138739633;138745280;138745280;138745280;138745280;138747564;138747675;138747564;138747564;138747564;138749317;138749317;138749317;138749317;138752837;138752837…	-;-;-;-;-;-;-;-;-;-;-;-;-;-;-;-;-;-;-;-;-;-;-;-;-;-;-;-;-;-;-;-;-;-;-;-;-;-;-;-;-;-;-;-;-;-;-;-;-;-;-;-;-;-;-;-;-;-;-;-;-;-;-;-;-;-;-;-;-;-;-;-;-;-;-;-;-;-;-;-;-	4034	0.603892	0.698082	0.712914	0.127648	0.200867	0.277397	1.47824e-05	0.000153028	1.65793
ATP8A2	13;13;13;13;13;13;13;13;13;13;13;13;13;13;13;13;13;13;13;13;13;13;13;13;13;13;13;13;13;13;13;13;13;13;13;13;13;13;13;13;13;13;13;13;13;13;13;13;13;13;13;13;13;13;13;13;13;13;13;13;13;13;13;13;13;13;13;13;13;13;13;13;13;13;13;13;13;13;13;13;13;13;13;13;13;13;13;13;13;13;13;13;13;13;13;13;13;13;13;13;13;13;13;13;13;13;13;13;13;13;13;13;13;13;13;13;13;13;13;13;13;13;13;13;13;13;13;13;13;13;13	25372071;25468977;25468977;25468979;25469021;25529999;25529999;25529999;25529999;25530562;25530562;25530562;25530572;25532272;25532272;25532272;25532272;25533273;25533273;25533273;25533273;25534181;25537988;25537988;25537988;25540319;25540319;25540319;25541919;25541919;25541919;25543291;25543291;25543291;25551338;25551338;25551338;25553793;25553793;25553793;25554991;25554991;25554991;25558973;255…	25372288;25469121;25469121;25469121;25469121;25530098;25530098;25530098;25530098;25530660;25530660;25530660;25530660;25532317;25532317;25532317;25532317;25533313;25533313;25533313;25533313;25534225;25538061;25538061;25538061;25540388;25540388;25540388;25542046;25542046;25542046;25543402;25543402;25543402;25551503;25551503;25551503;25553920;25553920;25553920;25555068;25555068;25555068;25559061;255…	+;+;+;+;+;+;+;+;+;+;+;+;+;+;+;+;+;+;+;+;+;+;+;+;+;+;+;+;+;+;+;+;+;+;+;+;+;+;+;+;+;+;+;+;+;+;+;+;+;+;+;+;+;+;+;+;+;+;+;+;+;+;+;+;+;+;+;+;+;+;+;+;+;+;+;+;+;+;+;+;+;+;+;+;+;+;+;+;+;+;+;+;+;+;+;+;+;+;+;+;+;+;+;+;+;+;+;+;+;+;+;+;+;+;+;+;+;+;+;+;+;+;+;+;+;+;+;+;+;+;+	10415	1.52973	1.68398	1.83951	0.238967	0.272303	0.326806	5.80109e-12	3.76208e-09	2.5122
AVIL	12;12;12;12;12;12;12;12;12;12;12;12;12;12;12;12;12;12;12;12;12;12;12;12;12;12;12;12;12;12;12;12;12;12;12;12;12;12;12;12;12;12;12;12;12;12;12;12;12;12;12;12;12;12;12;12;12;12;12;12;12;12;12;12;12;12;12;12;12;12;12;12;12;12;12;12	57797376;57797740;57797778;57797882;57799795;57799795;57799795;57799795;57801144;57801144;57801144;57802160;57802160;57802183;57803247;57803247;57803247;57803296;57803524;57803524;57803524;57805856;57806132;57806138;57806360;57806360;57806360;57806360;57807331;57807331;57807331;57807331;57807331;57807590;57807590;57807590;57807590;57808194;57808194;57808194;57808194;57808194;57808395;57808395;578…	57797995;57797995;57797995;57797995;57799920;57799920;57799920;57800653;57801417;57801212;57801212;57802348;57802348;57802348;57803391;57803391;57803391;57803391;57803669;57803669;57803669;57806567;57806539;57806539;57806539;57806489;57806539;57806539;57807489;57807489;57807727;57807489;57807489;57807641;57807727;57807727;57807727;57809179;57808294;57808294;57808294;57808294;57808548;57808692;578…	-;-;-;-;-;-;-;-;-;-;-;-;-;-;-;-;-;-;-;-;-;-;-;-;-;-;-;-;-;-;-;-;-;-;-;-;-;-;-;-;-;-;-;-;-;-;-;-;-;-;-;-;-;-;-;-;-;-;-;-;-;-;-;-;-;-;-;-;-;-;-;-;-;-;-;-	5889	0.339209	0.293626	0.423716	0.102013	0.146194	0.134597	0.000116988	0.000745389	1.39266
B3GNT3	19;19;19;19;19;19;19;19;19;19;19	17794828;17795110;17795136;17795157;17807739;17807758;17807758;17807758;17811571;17811571;17811571	17794883;17795206;17795173;17795206;17808374;17808189;17808374;17808374;17813082;17812233;17811753	+;+;+;+;+;+;+;+;+;+;+	2301	0.7411	0.644128	0.680063	1.47326	1.56266	1.23606	4.20385e-05	0.000338428	-1.12898
BCYRN1	2	47335315	47335514	+	200	24.8482	37.3005	27.9131	104.703	127.115	66.4419	6.92665e-06	8.50444e-05	-1.81349
BEND3P3	10	79682997	79685436	+	2440	0.579073	0.749168	0.727987	0.246211	0.269822	0.439506	0.003193	0.0104509	1.02295
BIN1	2;2;2;2;2;2;2;2;2;2;2;2;2;2;2;2;2;2;2;2;2;2;2;2;2;2;2;2;2;2;2;2;2;2;2;2;2;2;2;2;2;2;2;2;2;2;2;2;2;2;2;2;2;2;2;2;2;2;2;2;2;2;2;2;2;2;2;2;2;2;2;2;2;2;2;2;2;2;2;2;2;2;2;2;2;2;2;2;2;2;2;2;2;2;2;2;2;2;2;2;2;2;2;2;2;2;2;2;2;2;2;2;2;2;2;2;2;2;2;2;2;2;2;2;2;2;2;2;2;2;2;2;2;2;2;2;2;2;2;2;2;2;2;2;2;2;2;2;2;2;2;2;2;2;2;2;2;2;2;2;2;2;2;2;2;2;2;2;2;2;2;2;2;2;2;2;2;2;2;2;2;2;2;2;2;2;2;2;2;2;2;2;2	127048027;127048027;127048027;127048027;127048027;127048027;127048027;127048027;127048027;127048027;127048033;127048038;127050382;127050408;127050421;127050421;127050421;127050421;127050421;127050421;127050421;127050421;127050421;127050421;127050421;127050421;127050802;127050802;127050802;127050802;127050802;127050802;127050802;127050802;127050802;127050802;127050802;127050802;127050802;127050802…	127048633;127048633;127048633;127048633;127048633;127048633;127048633;127048633;127048633;127048633;127048633;127048633;127050522;127050522;127050522;127050522;127050522;127050522;127050522;127050522;127050522;127050522;127050522;127050522;127050522;127050522;127050912;127050912;127050912;127050912;127050912;127050912;127050912;127050912;127050912;127050912;127050912;127050912;127050912;127050912…	-;-;-;-;-;-;-;-;-;-;-;-;-;-;-;-;-;-;-;-;-;-;-;-;-;-;-;-;-;-;-;-;-;-;-;-;-;-;-;-;-;-;-;-;-;-;-;-;-;-;-;-;-;-;-;-;-;-;-;-;-;-;-;-;-;-;-;-;-;-;-;-;-;-;-;-;-;-;-;-;-;-;-;-;-;-;-;-;-;-;-;-;-;-;-;-;-;-;-;-;-;-;-;-;-;-;-;-;-;-;-;-;-;-;-;-;-;-;-;-;-;-;-;-;-;-;-;-;-;-;-;-;-;-;-;-;-;-;-;-;-;-;-;-;-;-;-;-;-;-;-;-;-;-;-;-;-;-;-;-;-;-;-;-;-;-;-;-;-;-;-;-;-;-;-;-;-;-;-;-;-;-;-;-;-;-;-;-;-;-;-;-;-	6929	0.302359	0.278075	0.286874	0.718383	0.657802	0.605618	1.66601e-06	2.84807e-05	-1.27543
BLNK	10;10;10;10;10;10;10;10;10;10;10;10;10;10;10;10;10;10;10;10;10;10;10;10;10;10;10;10;10;10;10;10;10;10;10;10;10;10;10;10;10;10;10;10;10;10;10;10;10;10;10;10;10;10;10;10;10;10;10;10;10;10;10;10;10;10;10;10;10;10;10;10;10;10;10;10;10;10;10;10;10;10;10;10;10;10;10;10;10	96191702;96191702;96191707;96191707;96196908;96196908;96199966;96200075;96200075;96200075;96200075;96200982;96200982;96200982;96200982;96200982;96204057;96204057;96204057;96204057;96204057;96204532;96204532;96204532;96204532;96204532;96204532;96204597;96207011;96207011;96207011;96207011;96207011;96207011;96207872;96207872;96207872;96207872;96207872;96207872;96209838;96209838;96209838;96209838;962…	96192092;96192092;96192092;96192092;96197063;96197063;96200158;96200158;96200158;96200158;96200158;96201058;96201058;96201058;96201058;96201058;96204088;96204088;96204088;96204088;96204088;96204854;96204616;96204616;96204616;96204616;96204616;96204616;96207053;96207053;96207053;96207053;96207053;96207053;96207899;96207899;96207899;96207899;96207899;96207899;96210303;96209907;96209907;96209907;962…	-;-;-;-;-;-;-;-;-;-;-;-;-;-;-;-;-;-;-;-;-;-;-;-;-;-;-;-;-;-;-;-;-;-;-;-;-;-;-;-;-;-;-;-;-;-;-;-;-;-;-;-;-;-;-;-;-;-;-;-;-;-;-;-;-;-;-;-;-;-;-;-;-;-;-;-;-;-;-;-;-;-;-;-;-;-;-;-;-	3655	3.38588	2.77098	3.36721	1.25622	1.24703	1.35221	5.14827e-08	2.33418e-06	1.22182
BMP7	20;20;20;20;20;20;20;20;20;20;20;20;20;20;20;20;20;20;20;20;20;20;20;20;20;20;20;20;20;20;20;20;20;20;20;20;20;20;20;20;20;20	57168748;57170531;57170917;57171039;57172996;57173200;57173200;57173200;57173200;57173220;57174931;57174931;57174931;57174931;57174931;57177696;57183722;57183722;57183722;57183722;57183722;57187050;57202474;57202474;57202475;57202475;57202475;57202475;57202475;57224575;57224760;57225855;57228229;57228229;57228229;57228229;57228229;57243864;57265705;57265705;57265705;57265705	57171108;57171108;57171108;57171108;57173310;57173589;57173310;57173310;57173310;57173310;57175007;57175007;57175007;57175007;57175007;57178037;57183919;57183919;57183919;57183919;57183919;57187156;57202623;57202623;57202623;57202623;57202623;57202623;57202623;57224685;57224840;57225962;57228421;57228421;57228421;57228421;57228421;57244034;57265778;57266629;57266342;57266628	-;-;-;-;-;-;-;-;-;-;-;-;-;-;-;-;-;-;-;-;-;-;-;-;-;-;-;-;-;-;-;-;-;-;-;-;-;-;-;-;-;-	5418	5.58442	4.96052	5.20656	11.4049	11.7495	11.7124	5.68361e-11	1.7432e-08	-1.22944
BNIPL	1;1;1;1;1;1;1;1;1;1;1;1;1;1;1;1;1;1;1;1;1;1;1;1;1;1;1;1;1;1;1;1;1;1;1;1;1;1;1;1;1;1	151036570;151036615;151037315;151037567;151037569;151038399;151038504;151038504;151038504;151038796;151038796;151038796;151038802;151038840;151042956;151042956;151042956;151042956;151042956;151043332;151043332;151043332;151043332;151043596;151043596;151043596;151043596;151044880;151045559;151045797;151045797;151045797;151045797;151046067;151046067;151046067;151046067;151046067;151046651;151046651…	151036766;151036766;151037662;151037662;151037662;151038564;151038568;151038568;151038568;151039026;151039026;151039026;151039026;151039026;151043068;151043138;151043138;151043138;151043138;151043434;151043434;151043434;151043434;151043727;151043727;151043727;151043727;151045033;151045883;151045883;151045883;151045883;151045883;151046160;151046165;151046165;151046165;151046165;151046687;151046845…	+;+;+;+;+;+;+;+;+;+;+;+;+;+;+;+;+;+;+;+;+;+;+;+;+;+;+;+;+;+;+;+;+;+;+;+;+;+;+;+;+;+	2892	7.34537	7.94368	7.83846	1.46895	1.57604	1.67673	1.18817e-12	1.45661e-09	2.21018
BRDT	1;1;1;1;1;1;1;1;1;1;1;1;1;1;1;1;1;1;1;1;1;1;1;1;1;1;1;1;1;1;1;1;1;1;1;1;1;1;1;1;1;1;1;1;1;1;1;1;1;1;1;1;1;1;1;1;1;1;1;1;1;1;1;1;1;1;1;1;1;1;1;1;1;1;1;1;1;1;1;1;1;1;1;1;1;1;1;1;1;1;1;1;1;1;1;1;1;1;1;1;1;1;1;1;1;1;1;1;1;1;1;1;1;1;1;1;1;1;1;1;1;1;1;1;1;1;1;1;1;1;1;1;1;1;1;1;1;1;1;1;1;1;1;1;1;1;1;1;1;1;1;1;1;1;1;1;1;1;1;1;1;1;1;1;1;1;1;1	91949371;91949371;91949371;91949371;91949372;91949384;91949398;91949398;91949398;91949398;91949398;91949401;91949401;91949401;91949403;91949403;91949403;91949403;91949434;91949638;91949638;91949638;91949638;91949638;91949638;91949638;91949638;91949638;91949890;91949890;91949890;91949890;91949890;91949900;91949900;91949900;91949900;91950108;91950305;91950305;91950716;91952162;91957529;91962718;919…	91949682;91949682;91949682;91949682;91949519;91949488;91949682;91949488;91949488;91949519;91949488;91949682;91949488;91949488;91949519;91949519;91949519;91949519;91949682;91949682;91949682;91949682;91949682;91949682;91949682;91949682;91949682;91949682;91949958;91950312;91950332;91950474;91949958;91949958;91950474;91950302;91950299;91950474;91950474;91950474;91950811;91952258;91957600;91962946;919…	+;+;+;+;+;+;+;+;+;+;+;+;+;+;+;+;+;+;+;+;+;+;+;+;+;+;+;+;+;+;+;+;+;+;+;+;+;+;+;+;+;+;+;+;+;+;+;+;+;+;+;+;+;+;+;+;+;+;+;+;+;+;+;+;+;+;+;+;+;+;+;+;+;+;+;+;+;+;+;+;+;+;+;+;+;+;+;+;+;+;+;+;+;+;+;+;+;+;+;+;+;+;+;+;+;+;+;+;+;+;+;+;+;+;+;+;+;+;+;+;+;+;+;+;+;+;+;+;+;+;+;+;+;+;+;+;+;+;+;+;+;+;+;+;+;+;+;+;+;+;+;+;+;+;+;+;+;+;+;+;+;+;+;+;+;+;+;+	4334	0.674509	0.558566	0.575741	0.118812	0.105166	0.0968235	1.90268e-07	5.99881e-06	2.39223
BRINP2	1;1;1;1;1;1;1;1;1;1;1;1;1;1;1	177171497;177229801;177255919;177256781;177256860;177257176;177257176;177273488;177273488;177276198;177276198;177278563;177278563;177280412;177280412	177171732;177230145;177256109;177257033;177257384;177257295;177257384;177273593;177273593;177276434;177276434;177278785;177278785;177281814;177282422	+;+;+;+;+;+;+;+;+;+;+;+;+;+;+	3953	0.234181	0.137478	0.235375	0.412501	0.448399	0.648728	0.000236023	0.00129222	-1.37862
BSG	19;19;19;19;19;19;19;19;19;19;19;19;19;19;19;19;19;19;19;19;19;19;19;19;19;19;19;19;19;19;19;19;19;19;19;19;19;19;19;19;19;19;19;19;19;19;19;19;19;19;19;19;19;19;19;19;19;19;19;19;19;19;19;19;19;19;19;19;19;19;19;19;19;19;19;19;19;19;19;19	571277;571310;572565;572572;572572;572578;572594;572596;572610;572619;572623;575047;575049;575213;577774;577774;577774;578836;579500;579500;579500;579500;579500;579500;579500;579500;579500;579509;579524;580379;580379;580379;580379;580379;580379;580379;580379;580379;580379;580646;580646;580646;580646;580646;580646;580646;580646;580646;580646;581315;581315;581315;581315;581315;581315;581315;581315;…	571579;571579;572701;572701;572701;572701;572701;572701;572701;572701;572701;575140;575140;575386;578121;578212;578121;579656;579656;579629;579579;579656;579656;579656;579980;579656;579656;579656;579656;580461;580461;580461;580461;580695;580461;580461;580461;580461;580461;580782;580775;580782;580782;580782;580782;580782;580782;580782;580782;581591;581402;581543;581591;581376;581591;581591;581591;…	+;+;+;+;+;+;+;+;+;+;+;+;+;+;+;+;+;+;+;+;+;+;+;+;+;+;+;+;+;+;+;+;+;+;+;+;+;+;+;+;+;+;+;+;+;+;+;+;+;+;+;+;+;+;+;+;+;+;+;+;+;+;+;+;+;+;+;+;+;+;+;+;+;+;+;+;+;+;+;+	3830	43.6208	45.4574	46.8973	112.039	97.8358	103.198	2.93627e-11	1.02065e-08	-1.2862
BTBD1	15;15;15;15;15;15;15;15;15;15;15;15;15;15;15;15;15;15;15;15;15;15;15;15;15;15	83016422;83017961;83018707;83018707;83018740;83020675;83020675;83020746;83028616;83029543;83030136;83030136;83030136;83030136;83030136;83041728;83041728;83041728;83041728;83050073;83050073;83056389;83056389;83056389;83066751;83066751	83018225;83018225;83018853;83018853;83018853;83020762;83020762;83020762;83028728;83029863;83030766;83030328;83030328;83030328;83030328;83041821;83041925;83041925;83041925;83050178;83050178;83056479;83056545;83056545;83067151;83067354	-;-;-;-;-;-;-;-;-;-;-;-;-;-;-;-;-;-;-;-;-;-;-;-;-;-	4169	3.01518	3.03372	2.79989	6.74184	6.30462	7.23601	3.08628e-10	5.81633e-08	-1.28052
BTBD7P1	10	13156684	13158136	-	1453	1.17362	1.29207	1.39714	0.472523	0.522816	0.481341	0.000159318	0.000948069	1.30342
BZW1	2;2;2;2;2;2;2;2;2;2;2;2;2;2;2;2;2;2;2;2;2;2;2;2;2;2;2;2;2;2;2;2;2;2;2;2;2;2;2;2;2;2;2;2;2;2;2;2;2;2;2;2;2;2;2;2;2;2;2;2;2;2;2;2;2;2;2;2;2;2;2;2;2;2;2;2;2;2;2;2;2;2;2;2	200810594;200811546;200811546;200811546;200811910;200811923;200812185;200812356;200812676;200812989;200813208;200813208;200813208;200813208;200813208;200813208;200813208;200813208;200813208;200813208;200815341;200815341;200815341;200815341;200815341;200815341;200815341;200815341;200815341;200815667;200815667;200815667;200815667;200815667;200815667;200815667;200815667;200816325;200816325;200816325…	200810697;200811990;200811727;200811946;200811990;200811990;200812309;200812493;200812885;200813050;200813281;200813281;200813281;200813281;200813404;200813281;200813281;200813281;200813281;200813281;200815517;200815517;200815517;200815715;200815517;200815517;200815517;200815517;200815517;200815762;200815761;200815761;200815761;200815761;200815761;200815761;200815761;200816390;200816390;200816390…	+;+;+;+;+;+;+;+;+;+;+;+;+;+;+;+;+;+;+;+;+;+;+;+;+;+;+;+;+;+;+;+;+;+;+;+;+;+;+;+;+;+;+;+;+;+;+;+;+;+;+;+;+;+;+;+;+;+;+;+;+;+;+;+;+;+;+;+;+;+;+;+;+;+;+;+;+;+;+;+;+;+;+;+	8085	14.0773	14.1278	13.9668	27.7157	26.9848	27.1162	9.79961e-11	2.428e-08	-1.03918
C10orf107	10;10;10;10;10;10;10;10;10;10	61662961;61662997;61681143;61686041;61686041;61690549;61690549;61760059;61760863;61765939	61663165;61663032;61681312;61686185;61686185;61690620;61690621;61760181;61761003;61766766	+;+;+;+;+;+;+;+;+;+	1685	1.35901	1.34873	1.02908	0.381997	0.571054	0.304383	0.000117129	0.000745716	1.48755
C15orf41	15;15;15;15;15;15;15;15;15;15;15;15;15;15;15;15;15;15;15;15;15;15;15;15;15;15;15;15;15;15;15;15;15;15;15;15;15;15;15;15;15;15;15;15;15;15;15;15;15;15;15;15;15;15;15;15;15;15;15;15;15;15;15;15;15;15;15;15;15;15;15;15;15;15;15;15;15;15;15;15;15;15;15;15;15;15;15;15;15;15;15;15;15;15;15;15;15;15;15;15;15;15;15;15;15;15;15;15;15;15;15;15;15;15;15;15;15;15;15	36579611;36579634;36579638;36579642;36579844;36579848;36594869;36594894;36594900;36640605;36640605;36644278;36644278;36644278;36644278;36644278;36644278;36644278;36644278;36645223;36645223;36645223;36645223;36645223;36645223;36645223;36645223;36645223;36647569;36648618;36654098;36654098;36654098;36654098;36654098;36654098;36654098;36654098;36654098;36657833;36657833;36657833;36657833;36657833;366…	36579961;36579961;36579961;36579961;36579961;36579961;36594918;36594918;36594918;36640659;36640659;36644323;36644323;36644323;36644323;36644323;36644323;36644323;36644323;36645287;36645287;36645287;36645287;36645287;36645287;36645287;36645287;36645287;36647658;36648757;36654158;36654158;36654158;36654158;36654158;36654158;36654158;36654158;36654158;36657905;36657905;36657905;36657905;36657905;366…	+;+;+;+;+;+;+;+;+;+;+;+;+;+;+;+;+;+;+;+;+;+;+;+;+;+;+;+;+;+;+;+;+;+;+;+;+;+;+;+;+;+;+;+;+;+;+;+;+;+;+;+;+;+;+;+;+;+;+;+;+;+;+;+;+;+;+;+;+;+;+;+;+;+;+;+;+;+;+;+;+;+;+;+;+;+;+;+;+;+;+;+;+;+;+;+;+;+;+;+;+;+;+;+;+;+;+;+;+;+;+;+;+;+;+;+;+;+;+	9009	0.313673	0.213873	0.225335	0.509655	0.702679	0.439916	4.09483e-05	0.0003317	-1.21442
C3	19;19;19;19;19;19;19;19;19;19;19;19;19;19;19;19;19;19;19;19;19;19;19;19;19;19;19;19;19;19;19;19;19;19;19;19;19;19;19;19;19;19;19;19;19;19;19;19;19;19;19;19;19;19;19;19;19;19;19;19;19;19;19;19;19;19;19;19;19;19;19;19;19;19;19;19;19;19;19;19;19;19;19;19;19;19;19;19;19;19;19;19;19;19;19;19;19;19;19;19;19;19;19;19;19;19;19;19	6677704;6677835;6677841;6677864;6677867;6677897;6678152;6678152;6678152;6678152;6678372;6678372;6678372;6678372;6679125;6679125;6679125;6679125;6679382;6679407;6679407;6680101;6680158;6680158;6680159;6681941;6681941;6681941;6682142;6682142;6682142;6684233;6684388;6684388;6684560;6684560;6684560;6684560;6684775;6684775;6684775;6684988;6684988;6684988;6686124;6686124;6686289;6686746;6686746;6690629…	6678023;6678023;6678023;6678287;6678023;6677958;6678287;6678330;6678287;6678287;6678455;6678455;6678455;6678455;6679201;6679208;6679208;6679208;6679496;6679496;6679496;6680151;6680263;6680263;6680263;6682030;6682030;6682030;6682229;6683360;6682229;6684439;6684478;6684439;6684632;6684650;6684650;6684650;6684834;6684834;6684834;6685038;6685146;6685146;6686376;6686287;6686902;6686902;6686902;6690727…	-;-;-;-;-;-;-;-;-;-;-;-;-;-;-;-;-;-;-;-;-;-;-;-;-;-;-;-;-;-;-;-;-;-;-;-;-;-;-;-;-;-;-;-;-;-;-;-;-;-;-;-;-;-;-;-;-;-;-;-;-;-;-;-;-;-;-;-;-;-;-;-;-;-;-;-;-;-;-;-;-;-;-;-;-;-;-;-;-;-;-;-;-;-;-;-;-;-;-;-;-;-;-;-;-;-;-;-	8328	0.15796	0.0533911	0.167586	0.437973	0.377029	0.25754	0.000209489	0.00117365	-1.56616
C3orf52	3;3;3;3;3;3;3;3;3;3;3;3;3;3;3;3;3;3;3;3;3;3;3;3;3;3;3;3;3;3;3;3	112086335;112086335;112086349;112086437;112086438;112093360;112093360;112093360;112093360;112093360;112102838;112102838;112102838;112102838;112102838;112109543;112109543;112111452;112111454;112111892;112112339;112112964;112112964;112112964;112116642;112116642;112116642;112116642;112119469;112119469;112128233;112128233	112086545;112086545;112086545;112086545;112086545;112093489;112093489;112093489;112093489;112093489;112102965;112102965;112102965;112102965;112102965;112109828;112109613;112111780;112111780;112112074;112112459;112113145;112113018;112113145;112116867;112117239;112118210;112118226;112119562;112119562;112131004;112128749	+;+;+;+;+;+;+;+;+;+;+;+;+;+;+;+;+;+;+;+;+;+;+;+;+;+;+;+;+;+;+;+	6021	1.27854	1.46056	1.60151	0.520263	0.496257	0.402682	4.16507e-08	2.0552e-06	1.52835
C4orf46	4;4;4;4;4;4	158666679;158666684;158668925;158671616;158671616;158671997	158669768;158669764;158669768;158671892;158672046;158672255	-;-;-;-;-;-	3730	1.39766	0.913919	0.997788	2.23183	2.13164	2.06254	5.99005e-06	7.57448e-05	-1.04383
C9orf69	9;9;9;9;9;9;9;9;9;9;9	136114581;136114581;136114589;136115456;136116786;136116804;136117866;136118072;136118072;136118485;136118485	136117024;136117024;136114950;136117024;136117024;136117024;136118274;136118438;136118431;136118534;136118863	-;-;-;-;-;-;-;-;-;-;-	3396	5.73875	5.57184	5.86567	11.6628	10.3941	11.4917	1.26419e-09	1.76557e-07	-1.04879
CA14	1;1;1;1;1;1;1;1;1;1;1;1;1;1;1;1;1;1;1;1;1;1;1;1;1;1;1;1;1;1;1;1;1;1	150257159;150257851;150257875;150258094;150260151;150260151;150260151;150260151;150260283;150261459;150261459;150261578;150262158;150262158;150262158;150262525;150262525;150262525;150262804;150262804;150262804;150263042;150263042;150263044;150263299;150263299;150263299;150263659;150263659;150263662;150263794;150263794;150264593;150264593	150258183;150258183;150258183;150258183;150260171;150261331;150260248;150260171;150260387;150261638;150261638;150261638;150262300;150262300;150262300;150262620;150262620;150262620;150262870;150263419;150262870;150263199;150263199;150263199;150263419;150263376;150263419;150263679;150263679;150263679;150263831;150263878;150264891;150265078	+;+;+;+;+;+;+;+;+;+;+;+;+;+;+;+;+;+;+;+;+;+;+;+;+;+;+;+;+;+;+;+;+;+	3833	0.394047	0.309343	0.275845	0.111952	0.237825	0.0851503	0.00991911	0.0260677	1.09952
CALCR	7;7;7;7;7;7;7;7;7;7;7;7;7;7;7;7;7;7;7;7;7;7;7;7;7;7;7;7;7;7;7;7;7;7;7;7;7;7;7;7;7;7;7;7;7;7;7;7;7;7;7;7;7;7;7;7;7;7;7;7;7;7;7;7;7;7;7;7;7;7;7;7;7;7;7;7;7;7;7;7;7;7;7;7;7;7;7;7;7;7;7;7;7;7;7;7;7;7	93424487;93424492;93426310;93426323;93426323;93426356;93426356;93434253;93434253;93434253;93434253;93434253;93434253;93434253;93435952;93435952;93435952;93435952;93435952;93435952;93435952;93438060;93438060;93438060;93438060;93438060;93438060;93438060;93438210;93438210;93438210;93438210;93438210;93438210;93438210;93441500;93441500;93443604;93443604;93443604;93443604;93443604;93443604;93443604;934…	93426589;93426589;93426589;93426589;93426589;93426589;93426589;93434294;93434294;93434294;93434294;93434294;93434294;93434294;93436170;93436170;93436170;93436170;93436170;93436170;93436170;93438126;93438126;93438126;93438126;93438126;93438126;93438126;93438270;93438270;93438270;93438270;93438270;93438270;93438270;93441549;93441549;93443757;93443757;93443757;93443757;93443757;93443757;93443757;934…	-;-;-;-;-;-;-;-;-;-;-;-;-;-;-;-;-;-;-;-;-;-;-;-;-;-;-;-;-;-;-;-;-;-;-;-;-;-;-;-;-;-;-;-;-;-;-;-;-;-;-;-;-;-;-;-;-;-;-;-;-;-;-;-;-;-;-;-;-;-;-;-;-;-;-;-;-;-;-;-;-;-;-;-;-;-;-;-;-;-;-;-;-;-;-;-;-;-	4042	0.470104	0.562249	0.565017	0.116779	0.275645	0.0692121	0.000207176	0.00116403	1.73142
CALML3-AS1	10;10;10;10;10;10;10;10;10	5514244;5517281;5517369;5521916;5521916;5521916;5524309;5526133;5526133	5517512;5517512;5517512;5522129;5523177;5522129;5524420;5526246;5526241	-;-;-;-;-;-;-;-;-	4757	0.368718	0.498512	0.462311	0.180412	0.223568	0.166626	0.000447361	0.00214585	1.13979
CAPN8	1;1;1;1;1;1;1;1;1;1;1;1;1;1;1;1;1;1;1;1;1;1;1;1;1;1;1;1;1;1;1;1;1;1;1;1;1;1;1;1;1;1;1;1;1;1;1;1;1;1;1;1;1;1;1;1;1;1;1;1;1;1;1;1;1;1;1;1;1;1;1;1;1;1;1;1;1;1;1	223538007;223538008;223538399;223539420;223539420;223541609;223541612;223541616;223541648;223543108;223543108;223543108;223543108;223543108;223544067;223544067;223544067;223544067;223544772;223544772;223544772;223545231;223545231;223549318;223549318;223549318;223550960;223550960;223550960;223553832;223558131;223609153;223612246;223615970;223615970;223616898;223619293;223619293;223619293;223620192…	223538139;223538139;223538491;223539491;223539498;223541859;223541859;223541859;223541859;223543166;223543166;223543166;223543166;223543166;223544183;223544270;223544183;223544183;223545374;223544850;223544850;223545299;223545299;223549382;223549382;223549382;223551017;223551017;223551017;223553900;223558167;223609364;223612257;223616145;223616145;223618281;223619453;223619453;223619453;223620266…	-;-;-;-;-;-;-;-;-;-;-;-;-;-;-;-;-;-;-;-;-;-;-;-;-;-;-;-;-;-;-;-;-;-;-;-;-;-;-;-;-;-;-;-;-;-;-;-;-;-;-;-;-;-;-;-;-;-;-;-;-;-;-;-;-;-;-;-;-;-;-;-;-;-;-;-;-;-;-	5192	0.469203	0.504323	0.692387	1.09096	0.926643	1.15846	2.93463e-05	0.000259782	-1.00483
CAPZA2	7;7;7;7;7;7;7;7;7;7;7;7;7;7;7;7;7;7;7;7;7;7;7;7;7;7;7;7;7;7;7;7;7;7;7;7;7;7;7;7;7;7;7;7;7;7;7;7;7;7;7;7;7;7;7;7;7;7;7;7;7;7;7;7;7;7;7;7;7;7;7;7;7;7;7;7	116811070;116811070;116861191;116862473;116862530;116862587;116862600;116862600;116862603;116862603;116862604;116862614;116873712;116880067;116886064;116888127;116888127;116888127;116888127;116888127;116888127;116888127;116888127;116888127;116888127;116892994;116892994;116892994;116892994;116892994;116892994;116892994;116892994;116892994;116893031;116898772;116898772;116898772;116898772;116898772…	116811102;116811102;116861350;116862650;116862650;116862650;116862650;116862650;116862650;116862650;116862650;116862650;116874290;116880147;116886102;116888190;116888190;116888699;116888190;116888190;116888190;116888190;116888190;116888190;116888190;116893045;116893045;116893045;116893045;116893045;116893045;116893045;116893045;116893045;116893045;116898835;116898835;116898835;116898835;116898835…	+;+;+;+;+;+;+;+;+;+;+;+;+;+;+;+;+;+;+;+;+;+;+;+;+;+;+;+;+;+;+;+;+;+;+;+;+;+;+;+;+;+;+;+;+;+;+;+;+;+;+;+;+;+;+;+;+;+;+;+;+;+;+;+;+;+;+;+;+;+;+;+;+;+;+;+	8425	2.75272	2.19315	2.28907	6.18326	5.55425	5.41248	5.70719e-10	9.30565e-08	-1.33009
CARD9	9;9;9;9;9;9;9;9;9;9;9;9;9;9;9;9;9;9;9;9;9;9;9;9;9;9;9;9;9;9;9;9;9;9;9;9;9;9;9;9;9;9;9;9;9;9;9;9;9;9;9;9;9;9;9;9;9;9;9;9;9;9;9;9;9;9	136361903;136362989;136363956;136363956;136363956;136363957;136364293;136364483;136364483;136364483;136364483;136364483;136364553;136365141;136365141;136365141;136365141;136366800;136366800;136366800;136366800;136366800;136367216;136367216;136367216;136367216;136367216;136367216;136367637;136367637;136367637;136367637;136369750;136369750;136369750;136369750;136369750;136370294;136370294;136370294…	136362180;136364401;136364401;136364162;136364401;136364401;136364401;136364559;136366845;136364559;136364559;136365217;136364559;136365217;136365217;136365217;136365217;136366845;136366845;136366845;136366845;136366845;136367257;136367976;136367257;136367257;136367630;136367257;136367976;136367828;136367828;136367976;136369875;136370701;136369875;136369875;136369875;136370437;136370437;136370437…	-;-;-;-;-;-;-;-;-;-;-;-;-;-;-;-;-;-;-;-;-;-;-;-;-;-;-;-;-;-;-;-;-;-;-;-;-;-;-;-;-;-;-;-;-;-;-;-;-;-;-;-;-;-;-;-;-;-;-;-;-;-;-;-;-;-	6699	1.44733	1.21686	1.60357	3.12593	3.2205	1.88619	0.000169186	0.000996012	-1.02961
CARNMT1	9;9;9;9;9;9;9;9;9;9;9;9;9;9;9	74981020;74984907;74996447;74998598;74998610;74999730;74999730;75016268;75016268;75016849;75017253;75017253;75027053;75028012;75028012	74983868;74985010;74996560;74998776;74998776;74999870;74999870;75016431;75016431;75017448;75017448;75017448;75027099;75028423;75028394	-;-;-;-;-;-;-;-;-;-;-;-;-;-;-	4610	1.55361	0.771612	1.24768	2.36429	2.38387	2.32624	2.46333e-05	0.000226124	-1.06611
CBLN3	14;14;14;14;14;14	24426532;24427605;24428286;24428286;24428755;24430739	24427986;24427986;24428405;24428405;24429525;24430954	-;-;-;-;-;-	2562	5.80024	6.30574	7.06527	2.12713	2.11509	2.47507	2.3321e-09	2.604e-07	1.43134
CCDC146	7;7;7;7;7;7;7;7;7;7;7;7;7;7;7;7;7;7;7;7;7;7;7;7;7;7;7;7;7;7;7;7;7;7;7;7;7;7;7;7;7;7;7;7;7;7;7;7;7;7;7;7;7;7;7;7	77122434;77122617;77167658;77167658;77236947;77236947;77241691;77241691;77242346;77254506;77254506;77254506;77256333;77256333;77258995;77258995;77259968;77260009;77262121;77262121;77273694;77274482;77274482;77278752;77278752;77278937;77278937;77280429;77280429;77282299;77282511;77282557;77282557;77282592;77286798;77286798;77286798;77286798;77286798;77287354;77287440;77287440;77287440;77287440;772…	77122468;77122732;77167824;77167824;77237029;77237029;77241900;77241900;77242430;77254563;77254567;77254563;77256509;77256509;77259289;77259068;77260236;77260236;77262307;77262307;77273789;77274652;77274652;77278840;77278840;77279101;77279101;77280653;77280653;77282785;77282785;77282785;77282785;77282785;77286855;77287170;77286926;77286926;77286926;77287577;77287577;77287577;77287577;77287577;772…	+;+;+;+;+;+;+;+;+;+;+;+;+;+;+;+;+;+;+;+;+;+;+;+;+;+;+;+;+;+;+;+;+;+;+;+;+;+;+;+;+;+;+;+;+;+;+;+;+;+;+;+;+;+;+;+	4457	0.491921	0.77593	0.996348	0.375483	0.272704	0.345222	0.000621819	0.00278711	1.10413
CCDC162P	6;6;6;6;6;6;6;6;6;6;6;6;6;6;6;6;6;6;6;6;6;6;6;6;6;6;6;6;6;6;6;6;6;6;6;6;6;6;6;6;6;6;6;6;6;6;6;6;6;6;6;6;6;6;6;6;6;6;6;6;6;6;6;6;6;6;6;6;6;6;6;6;6;6;6;6;6;6;6;6;6;6;6;6;6;6;6;6;6;6;6;6;6;6;6	109165833;109183927;109187636;109187959;109196485;109197073;109198359;109199533;109203715;109206352;109217225;109226566;109227059;109227446;109236614;109239328;109239328;109242179;109242179;109254448;109254448;109255371;109255371;109257546;109257546;109261889;109261889;109264801;109264801;109267808;109267808;109270039;109270039;109282567;109284467;109285485;109285976;109285976;109286342;109286342…	109165885;109184091;109187708;109188069;109196598;109197267;109198512;109199690;109203867;109206453;109217386;109226678;109227194;109227649;109236780;109239520;109239520;109242306;109242306;109254648;109254648;109255492;109255492;109257774;109257774;109262091;109262091;109264956;109264956;109267901;109267901;109271014;109270176;109282724;109284578;109285606;109286025;109286025;109286518;109286518…	+;+;+;+;+;+;+;+;+;+;+;+;+;+;+;+;+;+;+;+;+;+;+;+;+;+;+;+;+;+;+;+;+;+;+;+;+;+;+;+;+;+;+;+;+;+;+;+;+;+;+;+;+;+;+;+;+;+;+;+;+;+;+;+;+;+;+;+;+;+;+;+;+;+;+;+;+;+;+;+;+;+;+;+;+;+;+;+;+;+;+;+;+;+;+	10010	0.598682	0.577456	0.688681	0.235775	0.288379	0.326055	7.14463e-06	8.72415e-05	1.05662
CCDC173	2;2;2;2;2;2;2;2;2;2;2;2;2;2;2;2	169645425;169649182;169650329;169654075;169662280;169662326;169674576;169674576;169674867;169674867;169674937;169681007;169681007;169681270;169694261;169694261	169646182;169649346;169650521;169654214;169662436;169662436;169674769;169674769;169675040;169675040;169675040;169681233;169681181;169681324;169694433;169694350	-;-;-;-;-;-;-;-;-;-;-;-;-;-;-;-	2236	0.740854	0.729137	0.586346	1.36256	1.3363	1.68904	3.3183e-05	0.000284254	-1.17961
CCDC180	9;9;9;9;9;9;9;9;9;9;9;9;9;9;9;9;9;9;9;9;9;9;9;9;9;9;9;9;9;9;9;9;9;9;9;9;9;9;9;9;9;9;9;9;9;9;9;9;9;9;9;9;9;9;9;9;9;9;9;9;9;9;9;9;9;9;9;9;9;9;9;9;9;9;9;9;9;9;9;9;9;9;9;9;9;9;9;9;9;9;9;9;9;9;9;9;9;9;9;9;9;9;9;9;9;9;9;9;9	97307304;97307321;97307361;97307659;97307736;97307736;97307736;97307983;97307983;97307983;97309414;97309414;97309414;97309414;97312113;97312113;97312113;97313236;97313236;97313236;97314393;97314393;97314393;97314618;97314618;97314618;97314851;97314851;97314851;97317065;97317065;97317065;97318463;97318463;97318463;97320126;97320126;97320126;97322833;97322833;97322833;97323781;97323781;97323781;973…	97307371;97307371;97307551;97307806;97307806;97307806;97308132;97308132;97308132;97308132;97309604;97309604;97309493;97309604;97312201;97312201;97312201;97313345;97313336;97313345;97314521;97314521;97314521;97314728;97314728;97314728;97314946;97314946;97314946;97317228;97317228;97317228;97318582;97318582;97318582;97320205;97320205;97320205;97322921;97322921;97322921;97323903;97323903;97323903;973…	+;+;+;+;+;+;+;+;+;+;+;+;+;+;+;+;+;+;+;+;+;+;+;+;+;+;+;+;+;+;+;+;+;+;+;+;+;+;+;+;+;+;+;+;+;+;+;+;+;+;+;+;+;+;+;+;+;+;+;+;+;+;+;+;+;+;+;+;+;+;+;+;+;+;+;+;+;+;+;+;+;+;+;+;+;+;+;+;+;+;+;+;+;+;+;+;+;+;+;+;+;+;+;+;+;+;+;+;+	14155	0.657429	0.701542	0.851529	0.224332	0.246867	0.345865	3.55745e-07	9.27427e-06	1.35805
CCDC33	15;15;15;15;15;15;15;15;15;15;15;15;15;15;15;15;15;15;15;15;15;15;15;15;15;15;15;15;15;15;15;15;15;15;15;15;15;15;15;15;15;15;15;15;15;15;15;15;15;15;15;15;15;15;15;15;15;15;15;15;15;15;15;15;15;15;15;15;15;15;15;15;15;15;15;15;15;15;15;15;15;15;15;15;15;15;15;15;15	74202705;74203010;74203050;74209388;74209388;74209388;74212146;74212146;74212146;74212482;74213268;74217201;74217201;74218497;74218497;74218497;74221250;74236289;74243985;74243985;74262440;74266678;74266718;74268342;74268342;74271703;74271703;74272771;74272771;74279963;74279963;74280668;74280668;74281778;74281778;74295754;74295754;74295813;74300658;74318541;74318541;74318559;74318570;74330189;743…	74203098;74203098;74203098;74209534;74209534;74209534;74212277;74212277;74212277;74212973;74213488;74217433;74217581;74218789;74218861;74218861;74221557;74236740;74244148;74244148;74262573;74266787;74266787;74268458;74268458;74271794;74271794;74272891;74272891;74280092;74280092;74280801;74280801;74281849;74281849;74295948;74295948;74295948;74300829;74318658;74318658;74318658;74318658;74330354;743…	+;+;+;+;+;+;+;+;+;+;+;+;+;+;+;+;+;+;+;+;+;+;+;+;+;+;+;+;+;+;+;+;+;+;+;+;+;+;+;+;+;+;+;+;+;+;+;+;+;+;+;+;+;+;+;+;+;+;+;+;+;+;+;+;+;+;+;+;+;+;+;+;+;+;+;+;+;+;+;+;+;+;+;+;+;+;+;+;+	7067	0.213723	0.188754	0.173551	0.552554	0.54463	0.593792	2.6611e-07	7.58196e-06	-1.63717
CCDC69	5;5;5;5;5;5;5;5;5;5;5;5;5;5;5;5;5;5;5;5;5;5;5;5;5;5;5;5;5;5;5;5;5;5;5;5;5;5;5	151181052;151181052;151181235;151181393;151184344;151184344;151184344;151184344;151185422;151185422;151185422;151185447;151186023;151186023;151186023;151186023;151187386;151187386;151187386;151187386;151198842;151198997;151198997;151198997;151201582;151201582;151201582;151201582;151201582;151205400;151205400;151205400;151205400;151205400;151210656;151215566;151223923;151223923;151223923	151183614;151183614;151183614;151183614;151185215;151184441;151184441;151184441;151185541;151185541;151185541;151185541;151186124;151186124;151186124;151186124;151187459;151187459;151187459;151187459;151199084;151199084;151199084;151199084;151201688;151201688;151201688;151201688;151201688;151205475;151205475;151205475;151205477;151205475;151211145;151215686;151224092;151224145;151224093	-;-;-;-;-;-;-;-;-;-;-;-;-;-;-;-;-;-;-;-;-;-;-;-;-;-;-;-;-;-;-;-;-;-;-;-;-;-;-	4993	1.82476	1.72169	1.88042	0.910989	0.760717	0.775075	5.95247e-07	1.36954e-05	1.06164
CCDC80	3;3;3;3;3;3;3;3;3;3;3;3;3;3;3;3;3;3;3;3;3;3;3;3;3;3;3;3;3;3;3;3;3;3;3;3	112596794;112605101;112605467;112605600;112607176;112607176;112607176;112609978;112609978;112609978;112609978;112616710;112616710;112616710;112618968;112618968;112618968;112630113;112630113;112630113;112638028;112638028;112638028;112639400;112640327;112640432;112640564;112640721;112640766;112640924;112640924;112640924;112643262;112643262;112649316;112649316	112605763;112605763;112605763;112605763;112607256;112607256;112607256;112610280;112610081;112610081;112610081;112616858;112616858;112616858;112619104;112619104;112619104;112630269;112630269;112630269;112638097;112639916;112639916;112639916;112641269;112640837;112641056;112640837;112641038;112641143;112641038;112641300;112643457;112643457;112649530;112649447	-;-;-;-;-;-;-;-;-;-;-;-;-;-;-;-;-;-;-;-;-;-;-;-;-;-;-;-;-;-;-;-;-;-;-;-	13071	0.316837	0.328835	0.359152	0.114902	0.158854	0.121282	5.26729e-06	6.85449e-05	1.27168
CCDC83	11;11;11;11;11;11;11;11;11;11;11;11;11;11;11;11;11;11;11;11;11;11;11;11;11;11;11;11;11;11;11;11;11;11;11;11	85855101;85855397;85865096;85865096;85873210;85873211;85873211;85873231;85882513;85882513;85882513;85886200;85886200;85895293;85895293;85895293;85895293;85898947;85898947;85898947;85898947;85911281;85911281;85911281;85911281;85912649;85915419;85915419;85915419;85915419;85916028;85916028;85916031;85919349;85919349;85919349	85855584;85855584;85865218;85865218;85873295;85873295;85873295;85873295;85882675;85882675;85882675;85886367;85886367;85895384;85895384;85895384;85895384;85899015;85899015;85899015;85899015;85911402;85911402;85911402;85911402;85912741;85915498;85915442;85915498;85915498;85916233;85916233;85916233;85919583;85920021;85920021	+;+;+;+;+;+;+;+;+;+;+;+;+;+;+;+;+;+;+;+;+;+;+;+;+;+;+;+;+;+;+;+;+;+;+;+	2359	10.5334	10.4296	9.80672	23.3382	23.2071	21.9195	9.38926e-11	2.42466e-08	-1.23778
CCDC88B	11;11;11;11;11;11;11;11;11;11;11;11;11;11;11;11;11;11;11;11;11;11;11;11;11;11;11;11;11;11;11;11;11;11;11;11;11;11;11;11;11;11;11;11;11;11;11;11;11;11;11;11;11;11;11;11;11;11;11;11;11;11;11;11;11;11;11;11;11;11;11;11;11;11;11;11;11;11;11;11;11;11;11;11;11;11;11;11;11;11;11;11;11;11;11;11;11;11;11;11;11;11;11;11;11;11;11;11;11;11;11;11;11;11;11	64340223;64340223;64340607;64340607;64340907;64340907;64341109;64341109;64341270;64341270;64341421;64341421;64341599;64341599;64341606;64341994;64341994;64341994;64342294;64342294;64342294;64342502;64342522;64342522;64342731;64343179;64343179;64343179;64343179;64343507;64343507;64343507;64343507;64343539;64343778;64343778;64343778;64343778;64343778;64343997;64343997;64343997;64343997;64343997;643…	64340326;64340326;64340752;64340752;64341018;64341018;64341178;64341178;64341328;64341328;64341504;64341504;64341742;64341742;64341742;64342139;64342139;64342139;64342375;64342375;64342375;64342680;64342680;64342680;64342807;64343330;64343325;64343325;64343325;64343615;64343615;64343615;64343615;64343615;64343914;64343914;64343914;64343914;64343914;64345157;64345157;64345157;64345157;64345157;643…	+;+;+;+;+;+;+;+;+;+;+;+;+;+;+;+;+;+;+;+;+;+;+;+;+;+;+;+;+;+;+;+;+;+;+;+;+;+;+;+;+;+;+;+;+;+;+;+;+;+;+;+;+;+;+;+;+;+;+;+;+;+;+;+;+;+;+;+;+;+;+;+;+;+;+;+;+;+;+;+;+;+;+;+;+;+;+;+;+;+;+;+;+;+;+;+;+;+;+;+;+;+;+;+;+;+;+;+;+;+;+;+;+;+;+	8331	0.163752	0.207557	0.228444	0.0721107	0.121578	0.0727567	0.00220417	0.00771311	1.10252
CCNB1	5;5;5;5;5;5;5;5;5;5;5;5;5;5;5;5;5;5;5;5;5;5;5;5;5;5;5;5;5;5;5;5;5;5;5;5;5;5;5;5;5;5	69167010;69167135;69167216;69167263;69167266;69167908;69167908;69167908;69167908;69167908;69168173;69168173;69168173;69168173;69168173;69171270;69171270;69171270;69171270;69171270;69174251;69174251;69174251;69174251;69174257;69174877;69174877;69174877;69174877;69174877;69175397;69175397;69175397;69175397;69177061;69177239;69177239;69177291;69177524;69177524;69177524;69177524	69167283;69167283;69167283;69167283;69167485;69168078;69168078;69168078;69168078;69168078;69168343;69168343;69168343;69168343;69168343;69171452;69171452;69171452;69171452;69171452;69174255;69174409;69174409;69174409;69174409;69175113;69175113;69175063;69175113;69175113;69175537;69175537;69175537;69175537;69177349;69177358;69177349;69177349;69177700;69177697;69177630;69178245	+;+;+;+;+;+;+;+;+;+;+;+;+;+;+;+;+;+;+;+;+;+;+;+;+;+;+;+;+;+;+;+;+;+;+;+;+;+;+;+;+;+	2558	42.3223	40.8872	38.1262	87.3653	78.5587	69.8659	5.0617e-09	4.37432e-07	-1.04282
CD8A	2;2;2;2;2;2;2;2;2;2;2;2;2;2;2;2;2;2;2;2;2;2;2;2;2	86784610;86784610;86784611;86785920;86788530;86788530;86788530;86788530;86789323;86789323;86789323;86789640;86789640;86789640;86790328;86790328;86790328;86790328;86790777;86790777;86790777;86790777;86801511;86807447;86808119	86785971;86785971;86785971;86785971;86788560;86788560;86788560;86788560;86789433;86789433;86789433;86789750;86789750;86789750;86790681;86790681;86790681;86790681;86791095;86790825;86791680;86790895;86801657;86807782;86808396	-;-;-;-;-;-;-;-;-;-;-;-;-;-;-;-;-;-;-;-;-;-;-;-;-	3634	0.388811	0.258307	0.442245	0.106274	0.027872	0.0256609	4.60248e-05	0.000363964	2.60826
CD99P1	X;X;X;X;X;X;X;X;X;X;X;X;X;X;X;X;X;X;X;X;X;X;X;X;X;X;X;X;X;X;X;X;X;X;X;X	2609348;2609392;2609394;2609415;2610996;2610996;2610996;2610996;2612150;2612150;2612150;2612150;2615816;2615816;2615816;2615816;2616619;2618740;2618740;2618740;2619429;2619429;2619429;2619429;2622690;2622690;2623385;2623385;2623385;2623385;2626597;2626597;2626597;2637974;2637974;2655027	2609481;2609481;2609481;2609481;2611038;2611038;2611038;2611038;2612218;2612218;2612218;2612218;2615969;2615969;2615969;2616171;2618784;2618784;2618784;2618784;2619497;2619497;2619497;2619497;2622734;2622734;2623453;2623453;2623453;2623453;2626642;2626642;2626642;2638694;2638329;2657229	+;+;+;+;+;+;+;+;+;+;+;+;+;+;+;+;+;+;+;+;+;+;+;+;+;+;+;+;+;+;+;+;+;+;+;+	5921	0.362062	0.475606	0.364283	0.202923	0.145404	0.157493	0.000310081	0.00160446	1.14791
CDC20P1	9	87011652	87013151	+	1500	0.324814	0.3623	0.281951	0.85822	0.776533	0.87035	0.000293216	0.00153343	-1.45205
CDC45	22;22;22;22;22;22;22;22;22;22;22;22;22;22;22;22;22;22;22;22;22;22;22;22;22;22;22;22;22;22;22;22;22;22;22;22;22;22;22;22;22;22;22;22;22;22;22;22;22;22;22;22;22;22;22;22;22;22;22;22;22;22;22;22;22;22;22;22;22;22;22;22;22;22;22;22;22;22;22;22;22;22;22;22;22;22;22;22;22;22;22;22;22;22;22;22;22;22;22;22;22;22;22;22;22;22;22;22;22;22;22;22;22;22;22;22;22;22;22;22;22;22;22;22	19479459;19479482;19479738;19479738;19479826;19479826;19479826;19479901;19479938;19480150;19480158;19480158;19480158;19480158;19480158;19480158;19480158;19480953;19480953;19480953;19480953;19480953;19480953;19480953;19480953;19480953;19482690;19482690;19482690;19482690;19482690;19482690;19482690;19482690;19482751;19483862;19483862;19483862;19483862;19483862;19483862;19483862;19483862;19483862;194…	19479571;19479571;19480019;19480217;19480019;19480019;19480019;19480019;19480019;19480217;19480217;19480217;19480217;19480217;19480217;19480217;19480217;19481045;19481045;19481045;19481045;19481045;19481045;19481045;19481045;19481045;19482827;19482827;19482827;19482827;19482827;19482822;19482827;19482827;19482827;19484005;19484005;19484005;19484005;19484005;19483873;19484005;19484005;19484005;194…	+;+;+;+;+;+;+;+;+;+;+;+;+;+;+;+;+;+;+;+;+;+;+;+;+;+;+;+;+;+;+;+;+;+;+;+;+;+;+;+;+;+;+;+;+;+;+;+;+;+;+;+;+;+;+;+;+;+;+;+;+;+;+;+;+;+;+;+;+;+;+;+;+;+;+;+;+;+;+;+;+;+;+;+;+;+;+;+;+;+;+;+;+;+;+;+;+;+;+;+;+;+;+;+;+;+;+;+;+;+;+;+;+;+;+;+;+;+;+;+;+;+;+;+	2846	11.47	11.8217	10.4766	21.3047	21.2112	21.3634	1.41956e-09	1.86624e-07	-1.00313
CDH18	5;5;5;5;5;5;5;5;5;5;5;5;5;5;5;5;5;5;5;5;5;5;5;5;5;5;5;5;5;5;5;5;5;5;5;5;5;5;5;5;5;5;5;5;5;5;5;5;5;5;5;5;5;5;5;5;5;5;5;5;5;5;5;5;5;5;5;5;5;5;5;5;5;5;5;5;5;5;5;5;5;5;5;5;5;5;5;5;5;5;5;5;5;5;5;5;5;5;5;5	19472951;19473032;19473048;19473048;19473573;19473579;19473615;19478504;19483301;19483301;19483301;19483301;19483301;19483301;19502682;19502992;19502992;19502992;19502992;19502992;19520657;19520657;19520657;19520657;19520657;19520657;19543869;19543869;19543869;19543869;19543869;19543869;19543869;19571579;19571579;19571579;19571579;19571579;19571579;19571579;19591057;19591057;19591057;19591057;195…	19473716;19473716;19473716;19473716;19473716;19473716;19473716;19478636;19483446;19483443;19483446;19483552;19483552;19483552;19503109;19503109;19503109;19503109;19503109;19503109;19520778;19520778;19520778;19520778;19520778;19520778;19544005;19544005;19544005;19544005;19544005;19544005;19544005;19571832;19571832;19571832;19571832;19571832;19571832;19571832;19591244;19591244;19591244;19591244;195…	-;-;-;-;-;-;-;-;-;-;-;-;-;-;-;-;-;-;-;-;-;-;-;-;-;-;-;-;-;-;-;-;-;-;-;-;-;-;-;-;-;-;-;-;-;-;-;-;-;-;-;-;-;-;-;-;-;-;-;-;-;-;-;-;-;-;-;-;-;-;-;-;-;-;-;-;-;-;-;-;-;-;-;-;-;-;-;-;-;-;-;-;-;-;-;-;-;-;-;-	4853	2.54001	2.55523	2.4837	1.19369	0.939195	0.922333	7.0424e-08	2.9072e-06	1.22059
CDH26	20;20;20;20;20;20;20;20;20;20;20;20;20;20;20;20;20;20;20;20;20;20;20;20;20;20;20;20;20;20;20;20;20;20;20;20;20;20;20;20;20;20;20;20;20;20;20;20;20;20;20;20	59958427;59968967;59970082;59971962;59982923;59984639;59985001;59986014;59987453;59987453;59988904;59988904;59989106;59992378;59992378;59994208;59994250;59994250;59995833;59995833;59995833;59996364;59996374;59996394;59996631;59996631;59996631;59999586;59999586;59999586;59999586;59999586;59999586;60001343;60001343;60002813;60002813;60002813;60002813;60006713;60006713;60006713;60006713;60006713;600…	59958795;59969023;59970186;59972123;59983070;59984805;59985129;59986174;59987638;59987638;59989153;59989163;59989163;59992520;59992520;59994489;59994489;59994489;59996054;59996054;59996054;59996588;59996588;59996588;59996761;59996761;59996761;59999663;59999663;59999663;59999663;59999663;59999663;60001411;60001411;60002866;60002866;60002866;60002866;60006787;60006787;60006787;60006787;60006787;600…	+;+;+;+;+;+;+;+;+;+;+;+;+;+;+;+;+;+;+;+;+;+;+;+;+;+;+;+;+;+;+;+;+;+;+;+;+;+;+;+;+;+;+;+;+;+;+;+;+;+;+;+	5748	0.873063	1.14315	0.985944	0.403131	0.378857	0.413695	1.72247e-06	2.90896e-05	1.24134
CDK14	7;7;7;7;7;7;7;7;7;7;7;7;7;7;7;7;7;7;7;7;7;7;7;7;7;7;7;7;7;7;7;7;7;7;7;7;7;7;7;7;7;7;7;7;7;7;7;7;7;7;7;7;7;7;7;7;7;7;7;7;7;7;7;7;7;7;7;7;7;7;7;7;7;7;7;7;7;7;7;7;7;7;7;7;7;7;7;7;7;7;7;7;7;7;7;7;7;7;7;7;7;7;7;7;7;7;7;7;7;7	90466424;90479228;90494367;90563735;90563774;90563774;90563774;90563774;90596497;90604218;90604218;90604218;90604218;90604218;90604218;90608530;90608530;90666340;90709251;90709266;90709398;90709531;90709816;90709816;90709816;90709862;90716340;90726504;90726567;90726567;90726567;90726567;90726567;90726567;90726567;90726567;90726567;90726567;90726567;90747681;90747681;90747681;90747681;90747681;907…	90466513;90479274;90494430;90563863;90563863;90563863;90563863;90563863;90596718;90604249;90604249;90604249;90604249;90604249;90604249;90608575;90608575;90666411;90709610;90709395;90709610;90709957;90709957;90709957;90709957;90709957;90716394;90726812;90726812;90726812;90726812;90726812;90726812;90726644;90726812;90726812;90726812;90726812;90726812;90747775;90747775;90747725;90747775;90747775;907…	+;+;+;+;+;+;+;+;+;+;+;+;+;+;+;+;+;+;+;+;+;+;+;+;+;+;+;+;+;+;+;+;+;+;+;+;+;+;+;+;+;+;+;+;+;+;+;+;+;+;+;+;+;+;+;+;+;+;+;+;+;+;+;+;+;+;+;+;+;+;+;+;+;+;+;+;+;+;+;+;+;+;+;+;+;+;+;+;+;+;+;+;+;+;+;+;+;+;+;+;+;+;+;+;+;+;+;+;+;+	6841	0.840403	0.693296	0.871694	0.313631	0.30352	0.408939	6.14234e-06	7.72957e-05	1.14665
CDR2L	17;17;17;17;17	74987632;74999504;75001341;75002064;75003183	74988122;74999616;75001489;75002228;75005800	+;+;+;+;+	3536	1.77747	1.73251	1.84193	4.41731	3.90997	4.43051	1.8789e-09	2.32064e-07	-1.33563
CDSN	6;6	31115090;31120335	31117529;31120446	-;-	2552	9.39312	8.82778	11.6669	1.64784	1.78602	2.08282	7.99225e-12	4.31086e-09	2.35758
CDT1	16;16;16;16;16;16;16;16;16;16;16;16;16;16;16;16;16;16;16;16	88803213;88804545;88804611;88804762;88804762;88805440;88805440;88805724;88805724;88805768;88806021;88806021;88806021;88806486;88806486;88807051;88807051;88807281;88807281;88808115	88804059;88804667;88804667;88804898;88804898;88805637;88805637;88805869;88805869;88805869;88806217;88806121;88806121;88806638;88806674;88807203;88807203;88807342;88807482;88809258	+;+;+;+;+;+;+;+;+;+;+;+;+;+;+;+;+;+;+;+	3336	6.5284	6.54581	6.61773	13.6091	12.9797	11.6145	3.57899e-09	3.49891e-07	-1.04009
CEACAM5	19;19;19;19;19;19;19;19;19;19;19;19;19;19;19;19;19;19;19;19;19;19;19;19;19;19;19;19;19;19;19;19;19;19;19;19;19;19;19;19;19;19;19;19;19;19;19;19;19;19;19;19;19;19;19;19;19;19;19;19;19;19	41708585;41708618;41708621;41708626;41708649;41708649;41708649;41708649;41709680;41709680;41709680;41709680;41709680;41709680;41709680;41709680;41709716;41709914;41714971;41714971;41714971;41714971;41714971;41714971;41714971;41715650;41715650;41715650;41715650;41717455;41717455;41717455;41717455;41717455;41717458;41718128;41718128;41718128;41718128;41718128;41719930;41719930;41719930;41719930;417…	41708795;41708795;41708795;41708795;41708795;41708795;41708795;41708795;41710039;41710039;41710039;41710039;41710039;41710083;41710039;41710039;41710039;41710039;41715249;41715249;41715158;41715870;41715249;41715249;41715249;41715904;41715904;41715904;41715904;41717630;41717733;41717733;41717733;41717733;41717733;41718382;41718382;41718382;41718382;41718382;41720028;41720208;41720208;41720208;417…	+;+;+;+;+;+;+;+;+;+;+;+;+;+;+;+;+;+;+;+;+;+;+;+;+;+;+;+;+;+;+;+;+;+;+;+;+;+;+;+;+;+;+;+;+;+;+;+;+;+;+;+;+;+;+;+;+;+;+;+;+;+	3351	9.18899	8.89017	11.0811	19.6435	17.4857	23.4034	1.72729e-08	1.06791e-06	-1.13419
CEBPA-AS1	19	33302857	33305054	+	2198	2.85948	2.13532	2.34745	0.644251	0.96771	1.18792	1.08306e-05	0.000119726	1.31464
CENPH	5;5;5;5;5;5;5;5;5;5;5;5;5;5;5;5;5;5;5;5;5;5;5;5;5;5;5;5;5;5;5;5;5;5;5;5;5;5	69189548;69189574;69189592;69189646;69189742;69191795;69191795;69191795;69191795;69191795;69194647;69194647;69194647;69194647;69194647;69195717;69195717;69195717;69195717;69197053;69197053;69197053;69197053;69202506;69202506;69202506;69202506;69202919;69202919;69202919;69207731;69208196;69208196;69208196;69209707;69209707;69209707;69209707	69189768;69189768;69189768;69189768;69189768;69191850;69191850;69191850;69191850;69191850;69194695;69194695;69194695;69194695;69194695;69195791;69195750;69195791;69195791;69197109;69197499;69197109;69197109;69202569;69202569;69202569;69202569;69202970;69202970;69202970;69208359;69208359;69208359;69208359;69209929;69209801;69210356;69210357	+;+;+;+;+;+;+;+;+;+;+;+;+;+;+;+;+;+;+;+;+;+;+;+;+;+;+;+;+;+;+;+;+;+;+;+;+;+	2244	3.99503	3.67672	3.67516	7.09447	8.66626	7.97876	1.7603e-08	1.08404e-06	-1.14636
CENPV	17;17;17;17;17;17;17;17;17;17;17;17;17;17;17;17;17;17;17;17;17;17	16342534;16342534;16342534;16342874;16344597;16344597;16344597;16344597;16348038;16348616;16348616;16348616;16349140;16349502;16349714;16349931;16349931;16349931;16353027;16353027;16353027;16353628	16342941;16342941;16342941;16342941;16344711;16344711;16344742;16344711;16348708;16348685;16348685;16349333;16349333;16350029;16350029;16350029;16349956;16350029;16353445;16353499;16353456;16353656	-;-;-;-;-;-;-;-;-;-;-;-;-;-;-;-;-;-;-;-;-;-	2880	0.473686	0.360242	0.352438	0.953578	1.00232	1.16565	5.93276e-06	7.52638e-05	-1.47757
CEP55	10;10;10;10;10;10;10;10;10;10;10;10;10;10;10;10	93496632;93500040;93503113;93506988;93507010;93515405;93515405;93516935;93516935;93517207;93518877;93518877;93518877;93519682;93519682;93527950	93496923;93500234;93503388;93507056;93507056;93515555;93515555;93517248;93517248;93517248;93518948;93518948;93519111;93520277;93519807;93529092	+;+;+;+;+;+;+;+;+;+;+;+;+;+;+;+	3271	24.4578	24.6343	22.9241	44.5115	46.4787	45.4428	2.84024e-10	5.41794e-08	-1.00479
CEP78	9;9;9;9;9;9;9;9;9;9;9;9;9;9;9;9;9;9;9;9;9;9;9;9;9;9;9;9;9;9;9;9;9;9;9;9;9;9;9;9;9;9;9;9;9;9;9;9;9;9;9;9;9;9;9;9;9;9;9;9;9;9;9;9;9;9;9;9;9;9;9;9;9;9;9;9;9;9;9;9;9;9;9;9;9;9;9;9;9;9;9;9;9;9;9;9;9;9;9;9;9;9;9	78236062;78236081;78236141;78236162;78236207;78236232;78236351;78240023;78240023;78240023;78240023;78240023;78240023;78240292;78240292;78240292;78240292;78240292;78240292;78241696;78241696;78241696;78241696;78241696;78241696;78243462;78243462;78243462;78243462;78243462;78243462;78246669;78246669;78246669;78246669;78246669;78246669;78248291;78248291;78248291;78248291;78248291;78248291;78248762;782…	78236603;78236659;78236603;78236603;78236603;78236603;78236603;78240195;78240195;78240195;78240195;78240195;78240195;78240364;78240364;78240364;78240364;78240364;78240364;78241799;78241799;78241799;78241799;78241799;78241799;78243636;78243636;78243636;78243636;78243636;78243636;78246782;78246782;78246782;78246782;78246782;78246782;78248355;78248355;78248355;78248355;78248355;78248355;78248873;782…	+;+;+;+;+;+;+;+;+;+;+;+;+;+;+;+;+;+;+;+;+;+;+;+;+;+;+;+;+;+;+;+;+;+;+;+;+;+;+;+;+;+;+;+;+;+;+;+;+;+;+;+;+;+;+;+;+;+;+;+;+;+;+;+;+;+;+;+;+;+;+;+;+;+;+;+;+;+;+;+;+;+;+;+;+;+;+;+;+;+;+;+;+;+;+;+;+;+;+;+;+;+;+	14355	0.509112	0.557544	0.536207	1.46474	1.41823	1.35769	1.43492e-10	3.16127e-08	-1.48679
CERCAM	9;9;9;9;9;9;9;9;9;9;9;9;9;9;9;9;9;9;9;9;9;9;9;9;9;9;9;9;9;9;9;9;9;9;9;9;9;9;9;9;9;9;9;9;9;9;9;9;9;9;9;9;9;9;9;9;9;9;9;9;9;9;9;9;9;9;9;9;9;9;9;9;9;9;9;9;9;9;9;9;9;9;9;9;9;9;9;9;9;9;9;9;9	128411751;128411766;128419114;128419160;128419607;128420187;128420480;128420481;128420481;128421204;128421204;128422868;128422868;128422868;128422868;128422868;128422905;128422915;128423146;128423146;128423146;128423146;128423146;128423146;128423146;128424036;128424138;128424138;128424138;128424138;128424138;128424138;128424138;128424206;128424410;128424410;128424410;128424410;128424410;128424410…	128412072;128412072;128419278;128419278;128419802;128422978;128421074;128421074;128421074;128421510;128421511;128422978;128422978;128422978;128422978;128422978;128422978;128423263;128423263;128423263;128423263;128423263;128423263;128423263;128423263;128424272;128424269;128424182;128424272;128424272;128424273;128424272;128424272;128424272;128424614;128424614;128424614;128424614;128424614;128424614…	+;+;+;+;+;+;+;+;+;+;+;+;+;+;+;+;+;+;+;+;+;+;+;+;+;+;+;+;+;+;+;+;+;+;+;+;+;+;+;+;+;+;+;+;+;+;+;+;+;+;+;+;+;+;+;+;+;+;+;+;+;+;+;+;+;+;+;+;+;+;+;+;+;+;+;+;+;+;+;+;+;+;+;+;+;+;+;+;+;+;+;+;+	6059	14.2893	13.1767	13.8137	5.28332	5.40788	5.29437	1.42146e-11	6.31416e-09	1.28541
CERS4	19;19;19;19;19;19;19;19;19;19;19;19;19;19;19;19;19;19;19;19;19;19;19;19;19;19;19;19;19;19;19;19;19;19;19;19;19;19;19;19;19;19;19;19;19;19;19;19;19;19;19;19;19;19;19;19;19;19;19;19;19;19;19;19;19;19;19;19;19;19;19;19;19;19;19;19;19;19;19;19;19;19;19;19;19;19;19;19;19;19;19;19;19;19;19;19;19;19;19;19;19;19;19;19;19;19;19;19;19;19;19	8206736;8209303;8209313;8209326;8209340;8209353;8209356;8209371;8209376;8209383;8209431;8209634;8210683;8210706;8210706;8210706;8210706;8210706;8210706;8210706;8210706;8210706;8210706;8214366;8214366;8225027;8240486;8241341;8241341;8241341;8250526;8251044;8251044;8251076;8251076;8251076;8251076;8251076;8251076;8251110;8254499;8254499;8254499;8254499;8254499;8254499;8254499;8254499;8254499;8254499…	8206799;8209494;8209494;8209494;8209494;8209494;8209494;8209494;8209494;8209494;8209494;8209948;8210862;8210862;8210862;8210862;8210862;8210862;8210862;8210862;8210862;8210862;8210862;8214529;8214481;8225089;8240563;8241457;8241457;8241370;8251249;8251249;8251249;8251171;8251249;8251249;8251249;8251249;8251249;8251249;8254616;8254616;8254616;8254616;8254616;8254616;8254616;8254616;8254616;8254616…	+;+;+;+;+;+;+;+;+;+;+;+;+;+;+;+;+;+;+;+;+;+;+;+;+;+;+;+;+;+;+;+;+;+;+;+;+;+;+;+;+;+;+;+;+;+;+;+;+;+;+;+;+;+;+;+;+;+;+;+;+;+;+;+;+;+;+;+;+;+;+;+;+;+;+;+;+;+;+;+;+;+;+;+;+;+;+;+;+;+;+;+;+;+;+;+;+;+;+;+;+;+;+;+;+;+;+;+;+;+;+	4059	2.37668	1.72837	1.82341	1.13118	0.948239	0.6203	9.56242e-05	0.000637848	1.04241
CHCHD10	22;22;22;22;22;22;22;22;22;22;22;22;22;22;22;22;22	23765834;23765834;23765834;23765874;23765935;23766128;23766128;23766128;23766128;23766128;23767374;23767374;23767374;23767834;23767834;23767834;23767834	23766026;23766026;23766026;23766026;23766026;23766464;23766275;23766296;23766275;23766275;23767540;23767593;23767593;23768443;23767920;23767942;23767876	-;-;-;-;-;-;-;-;-;-;-;-;-;-;-;-;-	1360	3.40338	3.30575	3.6695	9.27635	8.15509	5.72538	2.50558e-06	3.90362e-05	-1.24181
CHDH	3;3;3;3;3;3;3;3;3;3;3;3;3;3;3	53812335;53818938;53819532;53820474;53821647;53822491;53823306;53823544;53823631;53840929;53840929;53840929;53844582;53844713;53846083	53818195;53819040;53819674;53820608;53821776;53822642;53824067;53824067;53824067;53840999;53840999;53840999;53844617;53844769;53846390	-;-;-;-;-;-;-;-;-;-;-;-;-;-;-	7758	0.364253	0.24836	0.365249	0.641619	0.522232	0.799335	4.5751e-05	0.000362348	-1.08326
CHRD	3;3;3;3;3;3;3;3;3;3;3;3;3;3;3;3;3;3;3;3;3;3;3;3;3;3;3;3;3;3;3;3;3;3;3;3;3;3;3;3;3;3;3;3;3;3;3;3;3;3;3;3;3;3;3;3;3;3;3;3;3;3;3;3;3;3;3;3;3;3;3;3;3;3;3;3;3;3;3;3;3;3;3;3;3;3;3;3;3;3;3;3;3;3;3;3;3;3;3;3;3;3;3;3;3;3;3;3;3;3;3;3;3;3;3;3;3;3;3;3;3;3;3;3;3;3;3;3;3;3;3;3;3;3;3;3;3;3;3;3;3;3;3;3;3;3;3;3;3;3;3;3;3;3;3;3;3;3;3;3;3;3;3;3;3;3;3;3;3;3;3;3;3;3;3;3;3;3;3;3;3;3;3;3;3;3;3;3;3;3;3;3;3;3	184380073;184380073;184380073;184380073;184380073;184380207;184380319;184380321;184380348;184380452;184380623;184380692;184380692;184380692;184380692;184380692;184380692;184380692;184380692;184380692;184380692;184380992;184381019;184381019;184381076;184381080;184381235;184381235;184381235;184381235;184381235;184381235;184381235;184381235;184381235;184381235;184381235;184381235;184381406;184381496…	184380466;184380466;184380466;184380466;184380466;184380466;184380466;184380466;184380466;184380466;184380795;184380795;184381160;184380795;184380795;184380795;184380795;184380795;184380795;184380795;184380795;184381130;184381130;184381364;184381130;184381130;184381364;184381364;184381364;184381364;184381364;184381364;184381364;184381364;184381364;184381364;184381364;184381364;184381624;184381624…	+;+;+;+;+;+;+;+;+;+;+;+;+;+;+;+;+;+;+;+;+;+;+;+;+;+;+;+;+;+;+;+;+;+;+;+;+;+;+;+;+;+;+;+;+;+;+;+;+;+;+;+;+;+;+;+;+;+;+;+;+;+;+;+;+;+;+;+;+;+;+;+;+;+;+;+;+;+;+;+;+;+;+;+;+;+;+;+;+;+;+;+;+;+;+;+;+;+;+;+;+;+;+;+;+;+;+;+;+;+;+;+;+;+;+;+;+;+;+;+;+;+;+;+;+;+;+;+;+;+;+;+;+;+;+;+;+;+;+;+;+;+;+;+;+;+;+;+;+;+;+;+;+;+;+;+;+;+;+;+;+;+;+;+;+;+;+;+;+;+;+;+;+;+;+;+;+;+;+;+;+;+;+;+;+;+;+;+;+;+;+;+;+;+	6620	0.537267	0.55972	0.728302	0.181497	0.191252	0.13382	7.49343e-07	1.59364e-05	1.76746
CHRNB4	15;15;15;15;15;15;15;15;15;15;15;15;15;15;15;15;15;15;15;15;15;15;15;15;15;15;15;15;15;15;15;15;15;15;15	78624119;78624408;78628967;78629353;78630928;78631062;78631076;78631076;78631288;78631288;78631288;78631288;78634622;78635439;78635439;78635439;78635439;78641079;78641079;78649379;78649379;78652578;78655544;78655544;78656212;78657332;78658280;78660512;78686918;78692578;78707988;78707988;78707988;78720177;78727612	78625291;78625291;78629945;78629945;78631185;78631185;78631185;78631185;78631332;78631332;78631332;78631332;78634739;78635587;78635587;78635587;78635587;78641245;78641245;78649439;78649439;78652671;78655663;78655663;78656690;78657383;78658369;78660532;78687399;78692894;78708052;78708105;78708105;78720286;78727754	-;-;-;-;-;-;-;-;-;-;-;-;-;-;-;-;-;-;-;-;-;-;-;-;-;-;-;-;-;-;-;-;-;-;-	4976	0.205619	0.228357	0.254979	0.0776124	0.111953	0.131182	0.00645203	0.0185451	1.0276
CHST11	12;12;12;12;12;12;12;12;12;12;12;12;12;12;12	104455295;104456916;104456968;104456971;104456973;104457001;104588848;104601906;104601906;104601906;104601906;104601906;104756949;104756949;104756949	104455636;104456996;104457529;104457514;104457529;104457514;104588943;104602147;104601991;104601991;104602279;104601991;104757339;104762014;104762014	+;+;+;+;+;+;+;+;+;+;+;+;+;+;+	6492	0.157604	0.129371	0.188923	0.244564	0.374443	0.323192	0.00110818	0.00445953	-1.0457
CHST3	10;10;10	71964365;72005736;72007172	71964694;72005982;72013564	+;+;+	6970	1.04854	0.914375	1.11041	0.394018	0.399626	0.515092	1.49631e-06	2.62685e-05	1.15032
CKLF	16;16;16;16;16;16;16;16;16;16;16;16;16;16;16;16;16;16;16;16;16;16;16;16	66552563;66552567;66552569;66552569;66552569;66552573;66552582;66553395;66558190;66558190;66558190;66558190;66563072;66563122;66563122;66563122;66563122;66565886;66565886;66565886;66565886;66565886;66566083;66566083	66552793;66552793;66552793;66552793;66552793;66552793;66552793;66553479;66558348;66558348;66558532;66558348;66563217;66563217;66563217;66563217;66563217;66566069;66566072;66566072;66566072;66566072;66566243;66566251	+;+;+;+;+;+;+;+;+;+;+;+;+;+;+;+;+;+;+;+;+;+;+;+	1161	6.12697	5.91493	5.50059	11.3468	12.4755	10.3211	2.00765e-07	6.20624e-06	-1.04478
CKLF-CMTM1	16;16;16;16;16;16;16;16;16;16;16;16;16;16;16;16;16;16;16;16	66552587;66552613;66552649;66552679;66552679;66558190;66563072;66563122;66563122;66563128;66566083;66569936;66577104;66577104;66577104;66577104;66578831;66578831;66578847;66578847	66552793;66552793;66552793;66552793;66552793;66558348;66563217;66563217;66563217;66563217;66566428;66570086;66577202;66577202;66577202;66577202;66579135;66579135;66579135;66578931	+;+;+;+;+;+;+;+;+;+;+;+;+;+;+;+;+;+;+;+	1413	5.24115	4.75515	4.51959	9.29283	10.0713	8.51343	2.45073e-07	7.11212e-06	-1.0258
CKS1B	1;1;1;1;1;1;1;1;1;1;1;1;1;1;1;1;1;1;1	154974653;154974683;154974699;154975032;154975531;154975539;154977299;154977987;154977987;154977987;154977987;154977987;154977987;154978725;154978725;154978725;154978725;154978725;154978725	154974912;154974804;154974804;154975104;154975624;154975608;154978114;154978114;154978114;154978114;154978114;154978684;154978114;154978916;154979074;154979241;154979249;154979125;154979248	+;+;+;+;+;+;+;+;+;+;+;+;+;+;+;+;+;+;+	2338	7.39791	7.14232	6.07798	14.426	15.5959	11.9456	8.0736e-08	3.22161e-06	-1.11137
CLCA2	1;1;1;1;1;1;1;1;1;1;1;1;1;1;1;1;1;1;1;1;1	86424086;86425339;86428418;86430862;86432369;86434518;86438876;86440148;86440280;86441437;86441437;86443787;86443787;86445384;86447508;86448134;86450563;86450563;86453369;86453369;86455085	86424433;86425476;86428568;86430970;86432528;86434745;86439106;86440325;86440325;86441543;86441543;86444011;86444011;86445519;86447778;86448468;86450733;86450733;86453602;86453602;86456558	+;+;+;+;+;+;+;+;+;+;+;+;+;+;+;+;+;+;+;+;+	4496	0.628531	0.604371	0.620843	0.0477213	0.0788488	0.0622231	1.28771e-08	8.57119e-07	3.20467
CLEC7A	12;12;12;12;12;12;12;12;12;12;12;12;12;12;12;12;12;12;12;12;12;12;12;12;12;12;12;12;12;12;12;12;12;12;12;12;12;12;12;12;12;12;12;12;12;12;12;12;12;12;12;12;12;12;12;12;12;12;12;12;12;12;12;12;12	10116777;10116777;10116777;10117862;10118068;10118154;10118227;10118458;10118458;10118458;10118549;10123245;10123245;10123245;10123245;10123245;10123245;10123245;10123245;10124746;10125087;10125087;10125087;10125297;10125297;10125297;10125297;10125297;10125297;10125297;10125297;10125297;10126571;10126571;10126571;10126571;10126571;10126571;10127040;10127327;10127446;10127747;10127747;10127747;101…	10118590;10117249;10118590;10118590;10118590;10118590;10118590;10118590;10118590;10118590;10118590;10123363;10123363;10123363;10123363;10123363;10123363;10123363;10123363;10125448;10125173;10125173;10125173;10125448;10125448;10125448;10125448;10125448;10125448;10125448;10125448;10125448;10126708;10126708;10126708;10126708;10126708;10127845;10127089;10127442;10127845;10127845;10127845;10127845;101…	-;-;-;-;-;-;-;-;-;-;-;-;-;-;-;-;-;-;-;-;-;-;-;-;-;-;-;-;-;-;-;-;-;-;-;-;-;-;-;-;-;-;-;-;-;-;-;-;-;-;-;-;-;-;-;-;-;-;-;-;-;-;-;-;-	4190	0.267448	0.22403	0.242249	0.0614477	0.0725205	0.0890231	0.000439835	0.00211624	1.62292
CLSTN2	3;3;3;3;3;3;3;3;3;3;3;3;3;3;3;3;3;3;3;3;3;3;3;3;3;3;3;3	139935185;139935187;140175951;140175951;140403629;140403629;140404558;140404558;140421125;140421125;140448519;140448519;140459521;140459521;140466610;140466610;140532324;140532324;140546515;140546515;140556513;140556513;140558640;140562138;140562811;140563080;140563961;140566053	139935483;139935483;140176073;140176073;140403824;140403824;140404766;140404766;140421274;140421274;140448704;140448704;140459769;140459769;140466731;140466731;140532486;140532486;140546681;140546681;140557055;140556661;140558857;140562308;140562956;140563203;140564145;140577397	+;+;+;+;+;+;+;+;+;+;+;+;+;+;+;+;+;+;+;+;+;+;+;+;+;+;+;+	14596	6.15201	5.48677	6.95991	1.58755	1.64116	2.09235	7.02842e-11	2.07431e-08	1.72376
CLYBL	13;13;13;13;13;13;13;13;13;13;13;13;13;13;13;13;13;13;13;13;13;13;13;13;13;13;13;13;13;13;13;13;13;13;13;13	99606669;99606690;99606696;99772824;99772824;99772824;99858861;99858861;99858861;99858861;99858861;99862991;99862991;99862991;99864818;99864818;99864818;99864818;99864818;99866240;99866240;99866240;99866317;99870938;99870938;99870938;99870938;99871018;99884977;99891318;99891318;99891318;99891318;99891318;99892443;99892845	99606757;99606757;99606757;99773010;99773010;99773010;99859049;99859049;99859049;99859049;99859049;99863092;99863092;99863092;99865238;99865238;99864911;99864911;99864911;99866407;99866407;99866407;99866407;99871062;99871062;99871062;99871062;99871062;99885105;99891612;99891437;99891437;99891613;99897134;99892564;99892894	+;+;+;+;+;+;+;+;+;+;+;+;+;+;+;+;+;+;+;+;+;+;+;+;+;+;+;+;+;+;+;+;+;+;+;+	7227	0.188767	0.191411	0.0936324	0.0653136	0.0490528	0.0387097	0.00195996	0.00704372	1.50344
CMAHP	6;6;6;6;6;6;6;6;6;6;6;6;6;6;6;6;6;6;6;6;6;6;6;6;6;6;6;6;6;6;6;6;6;6;6;6;6;6;6;6;6;6;6;6;6;6;6;6;6;6;6;6;6;6;6	25081068;25081570;25081803;25081862;25084480;25084480;25084480;25084480;25084653;25086617;25086784;25086784;25086784;25091896;25091896;25091896;25093514;25093514;25093514;25093514;25097061;25097061;25097061;25097061;25105812;25106359;25106359;25106359;25106359;25108576;25108576;25108576;25108576;25109500;25109500;25109500;25109502;25109956;25109956;25109956;25113592;25113592;25113592;25114991;251…	25081879;25081658;25081879;25081879;25084576;25084576;25084785;25084576;25084832;25086899;25086899;25086899;25086899;25092012;25092012;25092012;25093688;25093688;25093688;25093688;25097201;25097201;25097201;25097201;25106529;25106494;25106494;25106450;25106494;25108682;25108713;25108713;25108713;25109526;25109581;25109581;25109581;25110103;25110103;25110103;25113782;25113782;25113782;25115100;251…	-;-;-;-;-;-;-;-;-;-;-;-;-;-;-;-;-;-;-;-;-;-;-;-;-;-;-;-;-;-;-;-;-;-;-;-;-;-;-;-;-;-;-;-;-;-;-;-;-;-;-;-;-;-;-	4570	1.69514	1.67565	1.81386	0.309861	0.476514	0.530535	1.26351e-08	8.4823e-07	1.90365
COL17A1	10;10;10;10;10;10;10;10;10;10;10;10;10;10;10;10;10;10;10;10;10;10;10;10;10;10;10;10;10;10;10;10;10;10;10;10;10;10;10;10;10;10;10;10;10;10;10;10;10;10;10;10;10;10;10;10;10;10;10;10;10;10;10;10;10;10;10;10;10;10;10;10;10;10;10;10;10;10;10;10;10;10;10;10;10;10;10;10;10;10;10;10;10;10;10;10;10;10;10;10;10;10;10;10;10;10;10;10;10;10;10;10;10;10;10;10;10;10;10;10;10;10;10;10;10;10;10;10;10;10;10;10;10;…	104031286;104031286;104031288;104032204;104032674;104032674;104032674;104032906;104032906;104032906;104033238;104033238;104033945;104033945;104034621;104034621;104035263;104035474;104035474;104036492;104036492;104037045;104037045;104037636;104037636;104038406;104038406;104039071;104039071;104039445;104039608;104039973;104040351;104040351;104041065;104041065;104041303;104041303;104041485;104041485…	104032290;104032290;104031593;104032290;104032754;104032754;104032754;104032968;104032968;104032968;104033375;104033375;104034334;104034334;104034767;104034767;104035373;104035563;104035563;104036632;104036632;104037113;104037113;104037773;104037773;104038528;104038528;104039121;104039121;104039519;104039640;104039999;104040410;104040410;104041118;104041118;104041344;104041344;104041538;104041538…	-;-;-;-;-;-;-;-;-;-;-;-;-;-;-;-;-;-;-;-;-;-;-;-;-;-;-;-;-;-;-;-;-;-;-;-;-;-;-;-;-;-;-;-;-;-;-;-;-;-;-;-;-;-;-;-;-;-;-;-;-;-;-;-;-;-;-;-;-;-;-;-;-;-;-;-;-;-;-;-;-;-;-;-;-;-;-;-;-;-;-;-;-;-;-;-;-;-;-;-;-;-;-;-;-;-;-;-;-;-;-;-;-;-;-;-;-;-;-;-;-;-;-;-;-;-;-;-;-;-;-;-;-;-;-;-;-;-;-;-;-;-;-;-;-;-	6508	0.202135	0.159419	0.207954	0.0725294	0.0933807	0.0429864	0.00130109	0.00507524	1.36558
COL21A1	6;6;6;6;6;6;6;6;6;6;6;6;6;6;6;6;6;6;6;6;6;6;6;6;6;6;6;6;6;6;6;6;6;6;6;6;6;6;6;6;6;6;6;6;6;6;6;6;6;6;6;6;6;6;6;6;6;6;6;6;6;6;6;6;6;6;6;6;6;6;6;6;6;6;6;6;6;6;6;6;6;6;6;6;6;6;6;6;6;6;6;6;6;6;6;6;6;6;6;6;6;6;6;6;6;6;6;6;6;6;6;6;6;6;6;6;6;6;6;6;6;6;6;6;6;6;6;6;6;6;6;6;6;6;6;6;6;6;6;6;6;6;6;6;6;6;6;6;6;6	56056590;56056590;56056590;56056591;56057320;56057670;56059165;56059165;56059165;56059165;56059165;56059165;56060018;56060018;56060018;56060018;56060018;56060018;56060071;56060741;56060741;56060741;56060741;56060741;56060741;56060891;56060891;56060891;56060891;56060891;56060891;56061649;56061649;56061649;56061649;56061649;56061649;56064578;56064578;56064578;56064578;56064578;56064578;56067295;560…	56057844;56057844;56057844;56057844;56057844;56057844;56059242;56059242;56059242;56059242;56059242;56059242;56061177;56060218;56060218;56060218;56060218;56060116;56060080;56060795;56060795;56060795;56060795;56060795;56060795;56061037;56061037;56061035;56061037;56061037;56061037;56061681;56061681;56061681;56061681;56061681;56061681;56064609;56064622;56064622;56064622;56064622;56064622;56067330;560…	-;-;-;-;-;-;-;-;-;-;-;-;-;-;-;-;-;-;-;-;-;-;-;-;-;-;-;-;-;-;-;-;-;-;-;-;-;-;-;-;-;-;-;-;-;-;-;-;-;-;-;-;-;-;-;-;-;-;-;-;-;-;-;-;-;-;-;-;-;-;-;-;-;-;-;-;-;-;-;-;-;-;-;-;-;-;-;-;-;-;-;-;-;-;-;-;-;-;-;-;-;-;-;-;-;-;-;-;-;-;-;-;-;-;-;-;-;-;-;-;-;-;-;-;-;-;-;-;-;-;-;-;-;-;-;-;-;-;-;-;-;-;-;-;-;-;-;-;-;-	7078	0.254693	0.188461	0.209133	0.109127	0.0715505	0.118574	0.00323788	0.0105735	1.0235
COL28A1	7;7;7;7;7;7;7;7;7;7;7;7;7;7;7;7;7;7;7;7;7;7;7;7;7;7;7;7;7;7;7;7;7;7;7;7;7;7;7;7;7;7;7;7;7;7;7;7;7;7;7;7;7;7;7;7;7;7;7;7;7;7;7;7;7;7;7;7;7;7;7;7	7356203;7356568;7357632;7357875;7358629;7360390;7360390;7360390;7370725;7370725;7372998;7375461;7380660;7380782;7381544;7417632;7417632;7417859;7419885;7419885;7419885;7431218;7432473;7432473;7432473;7432632;7432632;7432632;7436395;7436395;7436395;7437394;7437394;7437394;7440790;7440790;7443585;7443585;7444418;7444418;7452319;7452319;7453440;7453440;7456044;7456044;7474601;7474601;7477112;7477112…	7357095;7357020;7358805;7358805;7358805;7360459;7360528;7360528;7370882;7370841;7373546;7375497;7380695;7380862;7381612;7417927;7417927;7417927;7420310;7419953;7419953;7431646;7432541;7432541;7432541;7432700;7432700;7432700;7436463;7436463;7436463;7437435;7437462;7437462;7440861;7440861;7443653;7443653;7444489;7444489;7452387;7452387;7453508;7453508;7456112;7456112;7474669;7474669;7477180;7477180…	-;-;-;-;-;-;-;-;-;-;-;-;-;-;-;-;-;-;-;-;-;-;-;-;-;-;-;-;-;-;-;-;-;-;-;-;-;-;-;-;-;-;-;-;-;-;-;-;-;-;-;-;-;-;-;-;-;-;-;-;-;-;-;-;-;-;-;-;-;-;-;-	6619	0.242911	0.335883	0.30031	0.051864	0.0612098	0.154973	0.000301183	0.00156776	1.62763
COL4A5	X;X;X;X;X;X;X;X;X;X;X;X;X;X;X;X;X;X;X;X;X;X;X;X;X;X;X;X;X;X;X;X;X;X;X;X;X;X;X;X;X;X;X;X;X;X;X;X;X;X;X;X;X;X;X;X;X;X;X;X;X;X;X;X;X;X;X;X;X;X;X;X;X;X;X;X;X;X;X;X;X;X;X;X;X;X;X;X;X;X;X;X;X;X;X;X;X;X;X;X;X;X;X;X;X;X;X;X;X;X;X;X;X;X;X;X;X;X;X;X;X;X;X;X;X;X;X;X;X;X;X;X;X;X;X;X;X;X;X;X;X;X;X;X;X;X;X;X;X;X;X;X;X;X	108439844;108439882;108439882;108439942;108442891;108539746;108539746;108539746;108559064;108559064;108559064;108563882;108563882;108563882;108568629;108568629;108568629;108568759;108568759;108568759;108571413;108571413;108571811;108571811;108573574;108573574;108575910;108575910;108577952;108577952;108578078;108578078;108578291;108578291;108580533;108580533;108580682;108580682;108580983;108580983…	108440206;108440206;108440206;108440206;108443091;108539805;108539805;108539805;108559153;108559153;108559153;108563926;108563926;108563926;108568673;108568673;108568673;108569035;108568821;108568821;108571466;108571466;108571837;108571837;108573654;108573654;108575972;108575972;108577987;108577987;108578119;108578119;108578383;108578383;108580586;108580586;108580738;108580738;108581027;108581027…	+;+;+;+;+;+;+;+;+;+;+;+;+;+;+;+;+;+;+;+;+;+;+;+;+;+;+;+;+;+;+;+;+;+;+;+;+;+;+;+;+;+;+;+;+;+;+;+;+;+;+;+;+;+;+;+;+;+;+;+;+;+;+;+;+;+;+;+;+;+;+;+;+;+;+;+;+;+;+;+;+;+;+;+;+;+;+;+;+;+;+;+;+;+;+;+;+;+;+;+;+;+;+;+;+;+;+;+;+;+;+;+;+;+;+;+;+;+;+;+;+;+;+;+;+;+;+;+;+;+;+;+;+;+;+;+;+;+;+;+;+;+;+;+;+;+;+;+;+;+;+;+;+;+	8738	7.31555	6.11762	8.28621	2.81392	3.05437	4.21543	4.88748e-06	6.47332e-05	1.02657
COL4A6	X;X;X;X;X;X;X;X;X;X;X;X;X;X;X;X;X;X;X;X;X;X;X;X;X;X;X;X;X;X;X;X;X;X;X;X;X;X;X;X;X;X;X;X;X;X;X;X;X;X;X;X;X;X;X;X;X;X;X;X;X;X;X;X;X;X;X;X;X;X;X;X;X;X;X;X;X;X;X;X;X;X;X;X;X;X;X;X;X;X;X;X;X;X;X;X;X;X;X;X;X;X;X;X;X;X;X;X;X;X;X;X;X;X;X;X;X;X;X;X;X;X;X;X;X;X;X;X;X;X;X;X;X;X;X;X;X;X;X;X;X;X;X;X;X;X;X;X;X;X;X;X;X;X;X;X;X;X;X;X;X;X;X;X;X;X;X;X;X;X;X;X;X;X;X;X;X;X;X;X;X;X;X;X;X;X;X;X;X;X;X;X;X;X;X;X;X;X;X;X…	108155607;108155607;108155608;108155608;108155608;108155891;108159462;108159462;108159462;108159462;108159462;108159462;108160463;108160463;108160463;108160463;108160463;108160463;108161619;108161619;108161619;108161619;108161619;108161619;108161631;108162892;108162892;108162892;108162892;108162892;108162892;108162892;108164600;108164600;108164600;108164600;108164600;108164877;108164877;108164877…	108157260;108157260;108157260;108157260;108157260;108157260;108159748;108159748;108159748;108159748;108159748;108159748;108160654;108160654;108160654;108160654;108160654;108160654;108161735;108161735;108161735;108161735;108161735;108161735;108161735;108163598;108163038;108163038;108163038;108163038;108163038;108163038;108164698;108164698;108164698;108164698;108164698;108164921;108165038;108165038…	-;-;-;-;-;-;-;-;-;-;-;-;-;-;-;-;-;-;-;-;-;-;-;-;-;-;-;-;-;-;-;-;-;-;-;-;-;-;-;-;-;-;-;-;-;-;-;-;-;-;-;-;-;-;-;-;-;-;-;-;-;-;-;-;-;-;-;-;-;-;-;-;-;-;-;-;-;-;-;-;-;-;-;-;-;-;-;-;-;-;-;-;-;-;-;-;-;-;-;-;-;-;-;-;-;-;-;-;-;-;-;-;-;-;-;-;-;-;-;-;-;-;-;-;-;-;-;-;-;-;-;-;-;-;-;-;-;-;-;-;-;-;-;-;-;-;-;-;-;-;-;-;-;-;-;-;-;-;-;-;-;-;-;-;-;-;-;-;-;-;-;-;-;-;-;-;-;-;-;-;-;-;-;-;-;-;-;-;-;-;-;-;-;-;-;-;-;-;-;-…	9282	0.68763	0.739845	0.883944	0.328235	0.300085	0.396837	3.59035e-06	5.12879e-05	1.09102
COL5A3	19;19;19;19;19;19;19;19;19;19;19;19;19;19;19;19;19;19;19;19;19;19;19;19;19;19;19;19;19;19;19;19;19;19;19;19;19;19;19;19;19;19;19;19;19;19;19;19;19;19;19;19;19;19;19;19;19;19;19;19;19;19;19;19;19;19;19;19;19;19	9959561;9960651;9962819;9966314;9966536;9967347;9967573;9967904;9968026;9968385;9968385;9968675;9968675;9969349;9969575;9969869;9970622;9970975;9971205;9972919;9973570;9973756;9973919;9974171;9974301;9976558;9977229;9977365;9977594;9978574;9978891;9979132;9979364;9979839;9979994;9980648;9980806;9981088;9982065;9985842;9986315;9986553;9986714;9989124;9989322;9989469;9991610;9991788;9992004;9992827…	9960557;9960890;9962887;9966426;9966746;9967400;9968079;9967939;9968079;9968492;9968492;9968887;9968728;9969402;9969682;9969922;9970675;9971028;9971258;9973026;9973623;9973809;9973972;9974224;9974408;9976611;9977282;9977472;9977701;9978627;9978980;9979239;9979417;9979892;9980047;9980692;9980859;9981132;9982118;9985895;9986422;9986606;9986758;9989177;9989366;9989522;9991654;9991841;9992048;9992880…	-;-;-;-;-;-;-;-;-;-;-;-;-;-;-;-;-;-;-;-;-;-;-;-;-;-;-;-;-;-;-;-;-;-;-;-;-;-;-;-;-;-;-;-;-;-;-;-;-;-;-;-;-;-;-;-;-;-;-;-;-;-;-;-;-;-;-;-;-;-	6750	0.194888	0.146384	0.150374	0.0762862	0.0675246	0.0828904	0.00653683	0.0187338	1.01892
COL6A3	2;2;2;2;2;2;2;2;2;2;2;2;2;2;2;2;2;2;2;2;2;2;2;2;2;2;2;2;2;2;2;2;2;2;2;2;2;2;2;2;2;2;2;2;2;2;2;2;2;2;2;2;2;2;2;2;2;2;2;2;2;2;2;2;2;2;2;2;2;2;2;2;2;2;2;2;2;2;2;2;2;2;2;2;2;2;2;2;2;2;2;2;2;2;2;2;2;2;2;2;2;2;2;2;2;2;2;2;2;2;2;2;2;2;2;2;2;2;2;2;2;2;2;2;2;2;2;2;2;2;2;2;2;2;2;2;2;2;2;2;2;2;2;2;2;2;2;2;2;2;2;2;2;2;2;2;2;2;2;2;2;2;2;2;2;2;2;2;2;2;2;2;2;2;2;2;2;2;2;2;2;2;2;2;2;2;2;2;2;2;2;2;2;2;2;2;2;2;2;2…	237324003;237324012;237324012;237324019;237324085;237324085;237324774;237325560;237325560;237325560;237325560;237325560;237325560;237325560;237332968;237333450;237333450;237333450;237333450;237333450;237333450;237334626;237334626;237334626;237334626;237334626;237334626;237334626;237336135;237336135;237336135;237336135;237336135;237336135;237338940;237339015;237339015;237339015;237339015;237339015…	237324814;237324814;237324814;237324814;237324814;237324814;237324814;237325724;237325724;237325724;237325724;237325724;237330180;237325724;237333548;237333548;237333548;237333548;237333548;237333548;237333548;237334786;237334889;237334889;237334889;237334889;237334889;237334889;237336532;237336532;237336532;237336532;237336532;237336532;237339117;237339117;237339117;237339117;237339117;237339117…	-;-;-;-;-;-;-;-;-;-;-;-;-;-;-;-;-;-;-;-;-;-;-;-;-;-;-;-;-;-;-;-;-;-;-;-;-;-;-;-;-;-;-;-;-;-;-;-;-;-;-;-;-;-;-;-;-;-;-;-;-;-;-;-;-;-;-;-;-;-;-;-;-;-;-;-;-;-;-;-;-;-;-;-;-;-;-;-;-;-;-;-;-;-;-;-;-;-;-;-;-;-;-;-;-;-;-;-;-;-;-;-;-;-;-;-;-;-;-;-;-;-;-;-;-;-;-;-;-;-;-;-;-;-;-;-;-;-;-;-;-;-;-;-;-;-;-;-;-;-;-;-;-;-;-;-;-;-;-;-;-;-;-;-;-;-;-;-;-;-;-;-;-;-;-;-;-;-;-;-;-;-;-;-;-;-;-;-;-;-;-;-;-;-;-;-;-;-;-;-…	19633	0.379691	0.463019	0.611781	0.18141	0.172827	0.182865	7.6903e-07	1.62556e-05	1.35739
COL6A6	3;3;3;3;3;3;3;3;3;3;3;3;3;3;3;3;3;3;3;3;3;3;3;3;3;3;3;3;3;3;3;3;3;3;3;3;3;3;3;3;3;3;3;3;3;3;3;3;3;3;3;3;3;3;3;3;3;3;3;3;3;3;3;3;3;3;3;3;3;3;3;3;3;3	130560334;130563068;130564994;130566702;130568047;130570818;130573956;130581561;130581682;130581741;130581990;130581990;130581990;130586506;130586506;130586506;130589090;130589090;130589090;130589974;130591041;130591041;130591041;130592541;130592541;130592541;130592696;130592696;130592696;130593061;130593061;130593061;130593199;130593199;130593199;130594281;130594281;130598365;130598365;130599757…	130560428;130563664;130565614;130567262;130568604;130571393;130574525;130581904;130581904;130581904;130582068;130582068;130582068;130586660;130586660;130586660;130589182;130589182;130589182;130590036;130591094;130591094;130591094;130592612;130592612;130592612;130592722;130592722;130592722;130593105;130593105;130593105;130593224;130593252;130593252;130594419;130594343;130598430;130598430;130599810…	+;+;+;+;+;+;+;+;+;+;+;+;+;+;+;+;+;+;+;+;+;+;+;+;+;+;+;+;+;+;+;+;+;+;+;+;+;+;+;+;+;+;+;+;+;+;+;+;+;+;+;+;+;+;+;+;+;+;+;+;+;+;+;+;+;+;+;+;+;+;+;+;+;+	9720	0.0350879	0.147401	0.126182	0.0132441	0.00521023	0.0335783	0.00132379	0.00513487	2.44113
COL9A3	20;20;20;20;20;20;20;20;20;20;20;20;20;20;20;20;20;20;20;20;20;20;20;20;20;20;20;20;20;20;20;20;20;20;20;20;20;20;20;20;20;20;20;20;20;20;20;20;20;20;20;20;20;20;20;20;20;20;20;20;20;20;20;20;20;20;20;20;20;20;20;20;20;20;20;20;20;20;20;20;20;20;20;20;20;20;20;20;20;20;20;20;20;20;20;20;20;20;20;20;20;20;20;20;20;20;20;20;20;20;20;20;20;20;20;20;20;20;20	62816244;62817062;62817443;62817567;62817567;62817811;62818518;62818518;62818518;62818518;62819222;62819222;62819222;62819222;62819929;62819929;62819929;62819929;62821181;62821181;62821181;62821181;62821507;62821507;62821507;62821507;62821757;62821757;62821757;62821757;62822111;62822111;62822111;62822111;62822591;62822591;62822591;62822591;62824422;62824445;62824445;62824445;62824445;62824968;628…	62816317;62817142;62817635;62817635;62817635;62817869;62818553;62818553;62818553;62818553;62819293;62819293;62819293;62819293;62819982;62819982;62819982;62819982;62821216;62821216;62821216;62821216;62821530;62821530;62821530;62821530;62821810;62821810;62821810;62821810;62822164;62822164;62822164;62822164;62822632;62822632;62822632;62822632;62824501;62824501;62824501;62824501;62824501;62825021;628…	+;+;+;+;+;+;+;+;+;+;+;+;+;+;+;+;+;+;+;+;+;+;+;+;+;+;+;+;+;+;+;+;+;+;+;+;+;+;+;+;+;+;+;+;+;+;+;+;+;+;+;+;+;+;+;+;+;+;+;+;+;+;+;+;+;+;+;+;+;+;+;+;+;+;+;+;+;+;+;+;+;+;+;+;+;+;+;+;+;+;+;+;+;+;+;+;+;+;+;+;+;+;+;+;+;+;+;+;+;+;+;+;+;+;+;+;+;+;+	4831	0.100853	0.0511329	0.0525265	0.426357	0.146762	0.221982	0.000432712	0.00209162	-2.06083
CORO1A	16;16;16;16;16;16;16;16;16;16;16;16;16;16;16;16;16;16;16;16;16;16;16;16;16;16;16;16;16;16;16;16;16;16;16;16;16;16;16;16;16;16;16;16;16;16;16;16;16;16;16;16;16;16;16;16;16;16;16;16;16;16;16;16;16;16;16;16;16;16;16;16;16;16;16;16;16;16;16;16;16;16;16;16;16;16;16;16;16;16;16	30182827;30182987;30183422;30183514;30183605;30183609;30183609;30183609;30183617;30183619;30183621;30183825;30184218;30184226;30184352;30184748;30185209;30185209;30185209;30185209;30185209;30185209;30185209;30185209;30185209;30185209;30185209;30185209;30185209;30185858;30185932;30186598;30186598;30186598;30186598;30186598;30186598;30186598;30186598;30186598;30186682;30186816;30186816;30186816;301…	30183013;30183133;30183725;30183633;30183725;30183725;30183725;30183725;30183725;30183725;30183725;30183961;30184343;30184343;30184421;30184964;30185407;30185407;30185648;30185407;30185407;30185407;30185407;30185407;30185407;30186720;30185407;30185407;30185407;30186118;30186720;30186720;30186720;30186720;30186720;30186720;30186720;30186720;30186720;30186720;30187223;30186945;30187223;30186938;301…	+;+;+;+;+;+;+;+;+;+;+;+;+;+;+;+;+;+;+;+;+;+;+;+;+;+;+;+;+;+;+;+;+;+;+;+;+;+;+;+;+;+;+;+;+;+;+;+;+;+;+;+;+;+;+;+;+;+;+;+;+;+;+;+;+;+;+;+;+;+;+;+;+;+;+;+;+;+;+;+;+;+;+;+;+;+;+;+;+;+;+	4871	2.10052	2.36323	1.77124	4.13165	4.29393	3.42682	7.97417e-07	1.65761e-05	-1.01414
COX7A2L	2;2;2;2;2;2;2;2;2;2;2;2;2;2;2;2;2;2;2;2;2;2;2;2;2;2	42333546;42349338;42350507;42350507;42350852;42350941;42352887;42353212;42353212;42353212;42353212;42353212;42353212;42359106;42360938;42361090;42361090;42361090;42361090;42365670;42368868;42388445;42388449;42413699;42415483;42424821	42333869;42351359;42351359;42351359;42351359;42351359;42353343;42353343;42353343;42353343;42353343;42353343;42353343;42360038;42361192;42361172;42361848;42361216;42361149;42365874;42369010;42388507;42388656;42413760;42415550;42425088	-;-;-;-;-;-;-;-;-;-;-;-;-;-;-;-;-;-;-;-;-;-;-;-;-;-	5605	3.98121	3.8607	3.50866	13.7882	13.2278	11.2301	6.11073e-12	3.76208e-09	-1.8379
CPHL1P	3;3;3;3;3;3;3;3;3;3;3;3;3;3;3;3;3;3;3;3;3;3;3;3;3;3;3;3;3;3;3	149229356;149229431;149229445;149230739;149230739;149241362;149241362;149241362;149244254;149245663;149247368;149249022;149249959;149252846;149254118;149255930;149256397;149257458;149266866;149269085;149269820;149270750;149273503;149275463;149275685;149276510;149276510;149276712;149277336;149288485;149291727	149229687;149229687;149229687;149230901;149230901;149241439;149241501;149241389;149244455;149245769;149247496;149249161;149250169;149253058;149254268;149256141;149256537;149257589;149267035;149269101;149270062;149270920;149273715;149275702;149275702;149276664;149276623;149276901;149277402;149288605;149291800	-;-;-;-;-;-;-;-;-;-;-;-;-;-;-;-;-;-;-;-;-;-;-;-;-;-;-;-;-;-;-	3934	0.260082	0.414426	0.354768	0.218155	0.128733	0.0948162	0.00617329	0.0179523	1.11097
CPXM2	10;10;10;10;10;10;10;10;10;10;10;10;10;10;10;10;10;10;10;10;10;10;10;10;10;10;10;10;10;10;10;10;10;10;10;10;10;10;10;10;10;10;10;10;10;10;10;10;10;10;10	123706207;123708498;123712614;123713234;123713276;123713448;123713448;123745636;123754663;123754663;123754663;123757213;123757213;123757213;123761872;123761872;123761872;123766973;123766973;123766973;123768467;123768526;123768526;123769457;123770916;123770916;123770916;123780167;123780167;123780167;123797976;123797976;123797976;123799115;123799115;123799115;123842349;123842349;123842349;123862614…	123706402;123708597;123712689;123713335;123713335;123713557;123713557;123747017;123754762;123754762;123754762;123757352;123757352;123757352;123762169;123762169;123762169;123767152;123767152;123767152;123768722;123768722;123768722;123769574;123771039;123771039;123771039;123780255;123780255;123780255;123798126;123798126;123798126;123799199;123799199;123799199;123842488;123842488;123842488;123862723…	-;-;-;-;-;-;-;-;-;-;-;-;-;-;-;-;-;-;-;-;-;-;-;-;-;-;-;-;-;-;-;-;-;-;-;-;-;-;-;-;-;-;-;-;-;-;-;-;-;-;-	4859	0.551494	0.386371	0.391679	0.158962	0.187607	0.268682	0.00165736	0.00614033	1.02566
CRB2	9;9;9;9;9;9;9;9;9;9;9;9;9;9;9;9;9;9;9;9;9;9;9;9;9;9;9;9;9;9;9;9	123356170;123356260;123362865;123362865;123365917;123365917;123366227;123366227;123367172;123367172;123367573;123367573;123368779;123370108;123370108;123370108;123371070;123371070;123371070;123372177;123372177;123372177;123373134;123373134;123373134;123374579;123374579;123375217;123375217;123376838;123376838;123379963	123356354;123356354;123363188;123363188;123366112;123366112;123366366;123366366;123367357;123367357;123367686;123367686;123368946;123370980;123370980;123370980;123371578;123371578;123371578;123372342;123372342;123372342;123373920;123373920;123374099;123374695;123374695;123375343;123375343;123377675;123378753;123380324	+;+;+;+;+;+;+;+;+;+;+;+;+;+;+;+;+;+;+;+;+;+;+;+;+;+;+;+;+;+;+;+	6349	0.299285	0.225663	0.233146	0.0811044	0.0877427	0.161564	0.00283687	0.00950404	1.10951
CREG2	2;2;2;2;2;2;2;2;2;2	101345551;101355253;101382079;101382926;101383533;101383533;101383533;101387017;101387017;101387017	101351070;101355366;101382690;101383080;101383702;101383702;101383702;101387140;101387466;101387595	-;-;-;-;-;-;-;-;-;-	7150	0.722313	0.704793	0.721636	1.5724	1.55826	1.7933	1.05131e-08	7.4075e-07	-1.27773
CRISPLD2	16;16;16;16;16;16;16;16;16;16;16;16;16;16;16;16;16;16;16;16;16;16;16;16;16;16;16;16;16;16;16;16;16;16;16;16;16;16;16;16;16;16;16;16;16;16;16;16;16;16;16;16;16;16;16;16;16;16;16;16;16;16;16;16;16;16;16;16;16;16;16;16;16;16;16;16;16;16;16;16;16;16;16;16	84819984;84819985;84819991;84819992;84819997;84820003;84820005;84820017;84836177;84838422;84838422;84838422;84838422;84838422;84838422;84838422;84838422;84842003;84845786;84845786;84845786;84845786;84845786;84845786;84845786;84849217;84849385;84849385;84849385;84849385;84849385;84849385;84850568;84850568;84850568;84850568;84850568;84850568;84850568;84854729;84854729;84854729;84854729;84854729;848…	84820133;84820133;84820133;84820133;84820133;84820133;84820133;84820133;84836435;84838735;84838735;84840023;84838735;84838735;84838551;84838735;84838735;84842265;84845904;84846150;84845904;84845904;84845904;84845904;84845904;84849517;84849517;84849517;84849517;84849517;84849517;84849517;84850683;84850683;84850683;84850683;84850683;84850683;84850683;84854829;84854829;84854829;84854829;84854829;848…	+;+;+;+;+;+;+;+;+;+;+;+;+;+;+;+;+;+;+;+;+;+;+;+;+;+;+;+;+;+;+;+;+;+;+;+;+;+;+;+;+;+;+;+;+;+;+;+;+;+;+;+;+;+;+;+;+;+;+;+;+;+;+;+;+;+;+;+;+;+;+;+;+;+;+;+;+;+;+;+;+;+;+;+	7965	0.862499	0.806352	0.934526	2.37586	2.30805	2.38251	1.20906e-10	2.78119e-08	-1.52073
CTA-204B4.2	8	140505813	140508043	-	2231	2.05283	1.68299	1.95255	0.634721	0.544798	0.835964	3.08376e-06	4.57215e-05	1.40865
CTA-390C10.10	22	25476218	25479971	+	3754	0.376382	0.276371	0.22532	0.0571537	0.148396	0.124203	0.00385972	0.0121671	1.33591
CTB-33O18.1	5;5;5	173562478;173563495;173572881	173562563;173563544;173573199	+;+;+	455	3.64077	3.58319	2.78852	1.13172	1.11304	1.74207	0.0010385	0.00422805	1.23184
CTBP1	4;4;4;4;4;4;4;4;4;4;4;4;4;4;4;4;4;4;4;4;4;4;4;4;4;4;4;4;4;4;4;4;4;4;4;4;4;4;4;4;4;4;4;4;4;4;4;4;4;4;4;4;4;4;4;4;4;4;4;4;4;4;4;4;4;4;4;4;4;4;4;4;4;4;4;4;4;4;4;4;4;4;4	1211448;1211448;1211685;1211914;1212182;1212275;1212913;1212913;1212913;1212913;1212913;1212913;1212913;1213478;1213478;1213478;1213478;1213478;1213478;1213991;1214191;1214343;1214343;1214343;1214343;1214421;1215991;1215991;1215991;1215991;1215991;1215991;1216086;1216175;1221458;1223420;1225351;1225360;1225360;1225360;1225360;1225360;1225360;1225360;1225360;1225360;1225438;1228199;1228199;1228199…	1212423;1212423;1212426;1212423;1212423;1212426;1213030;1213030;1213050;1213030;1213030;1213030;1213030;1213754;1213605;1213605;1213605;1213605;1213605;1214473;1214473;1214462;1214473;1214473;1214473;1214473;1216407;1216205;1216205;1216205;1216205;1216205;1216205;1216205;1221839;1223512;1225566;1225566;1225566;1225395;1225566;1225566;1225566;1225389;1225566;1225566;1225566;1228343;1228343;1228343…	-;-;-;-;-;-;-;-;-;-;-;-;-;-;-;-;-;-;-;-;-;-;-;-;-;-;-;-;-;-;-;-;-;-;-;-;-;-;-;-;-;-;-;-;-;-;-;-;-;-;-;-;-;-;-;-;-;-;-;-;-;-;-;-;-;-;-;-;-;-;-;-;-;-;-;-;-;-;-;-;-;-;-	8361	3.96256	3.79944	4.7447	9.68462	8.03778	8.48199	3.27985e-09	3.28868e-07	-1.14998
CTBP1-AS	4;4;4;4;4;4	1210120;1210890;1212034;1212675;1215546;1215959	1210558;1210956;1212539;1212770;1215690;1218591	+;+;+;+;+;+	3886	2.39473	2.47913	2.9385	5.74208	4.76982	5.81924	1.9557e-08	1.17207e-06	-1.14425
CTC-425O23.5	19	40355842	40360606	+	4765	0.327199	0.539148	0.869816	0.19812	0.11691	0.244627	0.000587888	0.0026662	1.54838
CTC-510F12.3	19	11208195	11208702	+	508	3.16501	2.91759	4.0794	1.26706	0.897227	1.83566	0.000852085	0.00358856	1.25568
CTC-512J12.6	19;19;19;19;19	44329695;44336623;44340416;44397199;44401568	44329936;44336718;44340539;44397256;44401608	-;-;-;-;-	561	4.25558	5.54811	4.07095	2.14173	1.98602	1.74535	0.000199661	0.00113074	1.14629
CTD-2012K14.2	16;16;16	67538557;67539266;67540045	67538807;67539482;67540106	-;-;-	530	1.10314	2.42362	2.9525	4.45303	4.29992	4.31069	0.00159804	0.00598147	-1.07516
CTD-2012K14.3	16;16	67542123;67542844	67542338;67542963	-;-	336	25.3761	24.5553	29.3279	68.8364	64.2087	70.6326	1.87945e-10	3.97275e-08	-1.44134
CTD-2012K14.4	16;16	67542304;67542491	67542428;67542572	-;-	207	34.5997	31.743	30.2382	78.9811	66.546	77.4845	5.85448e-09	4.84528e-07	-1.2933
CTD-2035E11.3	5;5;5;5;5;5	43018429;43018483;43019236;43023919;43024199;43024199	43018672;43018672;43019316;43024097;43024234;43024247	+;+;+;+;+;+	553	1.49778	2.14414	1.22366	3.25906	4.21266	3.37258	0.000387283	0.00191281	-1.24201
CTD-2147F2.1	15;15;15;15;15;15	97295881;97411192;97411255;97415790;97429770;97431791	97296323;97411278;97411278;97415824;97429889;97432094	+;+;+;+;+;+	989	1.62571	1.64848	1.83881	0.650824	0.819308	0.754311	0.000794789	0.00340419	1.12131
CTD-2165H16.4	5;5;5;5;5;5	14661808;14663101;14663103;14663879;14663879;14664434	14664604;14663315;14663343;14664275;14664051;14664573	-;-;-;-;-;-	2797	0.540001	0.264951	0.574587	0.184102	0.0724254	0.11669	0.000617239	0.00277279	1.76755
CTD-2515O10.5	16	30064306	30064825	-	520	5.99656	11.116	9.27184	18.6498	16.4591	18.202	1.27817e-05	0.000136651	-1.09696
CTD-3051D23.1	14	104842663	104845916	+	3254	0.344378	0.227741	0.389913	0.131872	0.0933807	0.200603	0.010131	0.026491	1.08605
CTD-3154N5.2	15	74598919	74599397	-	479	2.13604	2.06282	2.91369	0.627092	1.26873	0.68138	0.00169341	0.00625263	1.40321
CTD-3193O13.13	19;19	7912648;7913343	7912909;7913518	-;-	438	4.78321	6.42936	5.21416	2.84114	2.77498	1.80968	0.000765147	0.00330072	1.05478
CTDSPL	3;3;3;3;3;3;3;3;3;3;3;3;3;3;3;3;3;3;3;3;3;3;3;3;3;3;3;3;3;3;3;3;3;3;3;3;3;3;3;3;3;3;3;3;3	37861960;37862174;37862178;37911673;37944714;37947057;37947057;37947057;37947057;37954417;37954991;37957111;37957111;37964571;37964571;37964571;37964571;37964579;37964637;37967826;37967826;37967826;37967826;37967826;37967826;37968216;37971407;37971407;37971407;37971407;37971407;37975709;37975709;37975709;37975709;37975709;37975773;37980742;37980742;37980742;37980742;37980742;37981825;37982566;379…	37862278;37862278;37862278;37911827;37944804;37947211;37947171;37947211;37947211;37954909;37955157;37957143;37957143;37964672;37964672;37964672;37964672;37964672;37964672;37967882;37967882;37967882;37967882;37967882;37967882;37968432;37971499;37971499;37971499;37971499;37971499;37975894;37975894;37975786;37975894;37975894;37975894;37980863;37980863;37981125;37984469;37984469;37982384;37982643;379…	+;+;+;+;+;+;+;+;+;+;+;+;+;+;+;+;+;+;+;+;+;+;+;+;+;+;+;+;+;+;+;+;+;+;+;+;+;+;+;+;+;+;+;+;+	5796	0.134498	0.102287	0.131343	0.162878	0.227179	0.337869	0.00575576	0.0169551	-1.04824
CTHRC1	8;8;8;8;8;8;8;8;8;8;8;8;8	103371515;103371550;103372433;103375738;103375738;103375738;103377138;103378027;103378027;103378027;103382458;103382458;103382458	103371806;103371806;103372659;103375959;103376051;103375959;103377323;103378243;103378243;103378243;103382614;103382989;103382997	+;+;+;+;+;+;+;+;+;+;+;+;+	1776	0.219469	0.111272	0.166694	0.628202	0.655856	0.603826	6.83161e-05	0.000493808	-1.98307
CTIF	18;18;18;18;18;18;18;18;18;18;18;18;18;18;18;18;18;18;18;18;18;18;18;18;18;18;18;18;18;18;18;18;18;18;18;18;18;18;18;18;18;18;18;18;18;18;18;18;18;18;18;18;18;18;18;18;18;18;18;18;18;18;18;18	48539046;48539158;48539210;48539415;48539758;48539988;48540095;48619538;48619538;48619538;48619538;48619538;48619538;48621444;48625189;48636614;48636614;48636614;48636614;48636614;48636614;48636614;48663752;48663752;48663752;48663752;48663752;48663752;48663752;48664447;48664447;48664447;48664447;48664447;48670669;48670669;48670669;48670669;48692512;48711619;48711619;48711619;48711619;48711619;487…	48539312;48539312;48539312;48539831;48539831;48540058;48540337;48619745;48619745;48619745;48619745;48619745;48619745;48621641;48625236;48636685;48636685;48636685;48636685;48636685;48636685;48636685;48663825;48663825;48663812;48663825;48663811;48663825;48663825;48664551;48664551;48664534;48664551;48664551;48670744;48670744;48670744;48670744;48692670;48711657;48711695;48711695;48711695;48711695;487…	+;+;+;+;+;+;+;+;+;+;+;+;+;+;+;+;+;+;+;+;+;+;+;+;+;+;+;+;+;+;+;+;+;+;+;+;+;+;+;+;+;+;+;+;+;+;+;+;+;+;+;+;+;+;+;+;+;+;+;+;+;+;+;+	8100	1.8767	1.69561	1.99976	0.577444	0.706508	0.656216	2.90565e-09	3.01077e-07	1.44359
CTNNA3	10;10;10;10;10;10;10;10;10;10;10;10;10;10;10;10;10;10;10;10;10;10;10;10;10;10;10;10;10;10;10;10;10;10	65912518;65920111;65966612;65966612;65988692;65988692;66069308;66069308;66078951;66103157;66280470;66379152;66520617;66621692;66766155;66766264;66775444;66775444;67176901;67180317;67180317;67180317;67219607;67219607;67521842;67521842;67539503;67539503;67606857;67606857;67647415;67647415;67665541;67696000	65920617;65920617;65966746;65966746;65988797;65988797;66069489;66069489;66079103;66103249;66280621;66379352;66520773;66621784;66766416;66766416;66775524;66775524;67176984;67180443;67180520;67180520;67219873;67219870;67521961;67521961;67539669;67539669;67607049;67607049;67647518;67647518;67665652;67696169	-;-;-;-;-;-;-;-;-;-;-;-;-;-;-;-;-;-;-;-;-;-;-;-;-;-;-;-;-;-;-;-;-;-	11136	0.0831285	0.146404	0.148115	0.042387	0.0272864	0.0293086	0.000159596	0.000949201	1.82402
CTSF	11;11;11;11;11;11;11;11;11;11;11;11;11;11;11;11;11;11;11;11;11;11;11;11;11;11;11;11;11;11;11;11;11;11;11;11;11;11;11;11;11;11;11;11;11;11;11;11;11;11;11;11;11;11;11;11	66563463;66563464;66564088;66564088;66564537;66564558;66564575;66564742;66564742;66564742;66564742;66564742;66564798;66564887;66564887;66564887;66564887;66564887;66565671;66565671;66565671;66565671;66565671;66565671;66565831;66565831;66565831;66565831;66566022;66566022;66566022;66566022;66566022;66566022;66566291;66566291;66566291;66566291;66566291;66566375;66567246;66567246;66567246;66567246;665…	66564007;66564007;66564648;66564146;66564648;66564648;66564648;66564806;66564806;66564806;66564806;66564806;66564991;66565006;66565006;66565006;66565006;66565006;66565927;66565927;66565751;66565749;66565751;66565751;66565927;66565927;66565927;66565927;66566148;66566134;66566157;66566167;66566167;66566167;66566404;66566404;66566401;66566404;66566404;66566404;66567321;66567306;66567321;66567321;665…	-;-;-;-;-;-;-;-;-;-;-;-;-;-;-;-;-;-;-;-;-;-;-;-;-;-;-;-;-;-;-;-;-;-;-;-;-;-;-;-;-;-;-;-;-;-;-;-;-;-;-;-;-;-;-;-	2896	0.858019	0.938278	0.861624	6.37146	5.47355	4.76563	6.53498e-12	3.78593e-09	-2.72873
CTSK	1;1;1;1;1;1;1;1;1;1;1;1;1;1;1;1	150796208;150799168;150799544;150804012;150804021;150804041;150805861;150805861;150805861;150806102;150806102;150806686;150806686;150806686;150807249;150808214	150796898;150799273;150799709;150804239;150804239;150804239;150806016;150806016;150806016;150806224;150806224;150806806;150806768;150806806;150807434;150808323	-;-;-;-;-;-;-;-;-;-;-;-;-;-;-;-	1887	0.903694	0.445086	0.851679	0.318365	0.13419	0.395344	0.00448516	0.0137721	1.27191
CYP1A1	15;15;15;15;15;15;15;15;15;15;15;15;15;15;15;15;15;15;15;15;15;15;15;15;15;15;15;15;15;15;15;15;15;15;15;15;15;15;15;15;15;15;15;15;15;15;15;15;15;15;15;15;15;15;15;15;15;15;15;15;15;15;15;15;15;15;15;15;15	74719542;74719542;74719542;74719542;74720156;74720430;74720720;74720720;74720720;74720720;74720967;74720967;74720967;74720967;74720967;74720967;74720967;74721199;74721199;74721199;74721199;74721199;74721199;74721199;74721199;74721199;74721199;74721414;74721414;74721414;74721414;74721414;74721414;74721414;74721414;74721414;74721414;74721591;74721591;74721591;74721591;74721591;74721591;74721591;747…	74720774;74720774;74720774;74720774;74720774;74720774;74720774;74721053;74720774;74720774;74721053;74721053;74721053;74721053;74721053;74721053;74721053;74721322;74721322;74721322;74721322;74721322;74721322;74721322;74721322;74721322;74721322;74721503;74721503;74721503;74721503;74721503;74721503;74721503;74721503;74721503;74721503;74721717;74722069;74721717;74721717;74721717;74721717;74721717;747…	-;-;-;-;-;-;-;-;-;-;-;-;-;-;-;-;-;-;-;-;-;-;-;-;-;-;-;-;-;-;-;-;-;-;-;-;-;-;-;-;-;-;-;-;-;-;-;-;-;-;-;-;-;-;-;-;-;-;-;-;-;-;-;-;-;-;-;-;-	3435	1.61698	0.90611	1.3051	2.49846	2.91919	3.10839	2.27275e-06	3.6202e-05	-1.23345
CYP2J2	1;1;1;1;1;1;1;1;1;1;1;1;1;1;1;1;1;1;1;1;1;1;1;1;1;1;1;1;1;1;1;1;1;1;1;1;1;1;1;1	59893308;59893316;59893320;59893320;59900965;59900965;59900965;59900965;59904366;59904366;59904871;59904871;59904871;59907786;59907786;59907786;59907786;59909784;59909784;59909784;59909784;59909911;59911608;59911608;59911608;59911608;59911608;59912162;59912162;59912162;59912162;59912162;59915938;59915938;59915938;59915938;59926521;59926537;59926537;59926537	59893829;59893829;59893829;59893829;59901103;59901103;59901103;59901103;59904516;59904516;59905058;59905058;59905058;59907927;59907927;59907927;59907927;59909960;59909960;59909960;59909960;59909960;59911768;59911768;59911768;59911768;59911768;59912311;59912311;59912311;59913238;59912311;59916100;59916100;59916100;59916100;59926755;59926761;59926761;59926790	-;-;-;-;-;-;-;-;-;-;-;-;-;-;-;-;-;-;-;-;-;-;-;-;-;-;-;-;-;-;-;-;-;-;-;-;-;-;-;-	2990	0.78216	0.693977	0.438485	0.129164	0.271002	0.296285	0.000937613	0.00388404	1.37704
CYP4V2	4;4;4;4;4;4;4;4;4;4;4;4;4;4;4;4;4;4;4;4;4;4;4;4;4;4;4	186191520;186194500;186196003;186196088;186196940;186197533;186198957;186198957;186201157;186201157;186204381;186204837;186205200;186205200;186205200;186208865;186208865;186208865;186208865;186209093;186209093;186209093;186209093;186210469;186210469;186210469;186210469	186192037;186194612;186196088;186197602;186197130;186197602;186199083;186199083;186205302;186201342;186204457;186205058;186205302;186205302;186205302;186208999;186208999;186208999;186208999;186209272;186209272;186209272;186209272;186213456;186213011;186211035;186210801	+;+;+;+;+;+;+;+;+;+;+;+;+;+;+;+;+;+;+;+;+;+;+;+;+;+;+	9807	0.218596	0.151131	0.22425	0.389424	0.402793	0.408874	3.03856e-05	0.000267258	-1.08987
CYP51A1	7;7;7;7;7;7;7;7;7;7;7;7;7;7;7;7;7;7;7;7;7;7;7;7;7;7;7;7;7;7	92112151;92113412;92113585;92113694;92117044;92117044;92117044;92117044;92117177;92118520;92118520;92118520;92123120;92123120;92123120;92123734;92123734;92123734;92126253;92126253;92127505;92127505;92128880;92128880;92131774;92131774;92131807;92134173;92134666;92142463	92113843;92113843;92113843;92113843;92117448;92117092;92117212;92117212;92117212;92118615;92118615;92118615;92123315;92123315;92123315;92123844;92123853;92123853;92126427;92126427;92127631;92127631;92129056;92129056;92131872;92131872;92131872;92134530;92134803;92142952	-;-;-;-;-;-;-;-;-;-;-;-;-;-;-;-;-;-;-;-;-;-;-;-;-;-;-;-;-;-	4074	11.6244	10.4533	10.35	23.0986	22.0773	22.6949	9.45559e-11	2.42466e-08	-1.14901
CYSRT1	9;9	137224635;137225614	137225233;137226311	+;+	1297	6.38608	4.8757	4.14122	12.4399	11.6359	9.85003	6.83242e-07	1.5095e-05	-1.2298
DCTN6	8;8;8;8;8;8;8;8;8;8;8;8;8;8;8;8;8;8;8;8;8;8;8;8;8;8;8;8;8;8;8;8;8;8;8;8	30156297;30156319;30156369;30156369;30156370;30156375;30164111;30164111;30164111;30164111;30164111;30164111;30165716;30175085;30175085;30175085;30175085;30175085;30177126;30177126;30177126;30177126;30177126;30179408;30179408;30179408;30179408;30179408;30180488;30180488;30180488;30180488;30180488;30183075;30183075;30183075	30156406;30156406;30156406;30156406;30156406;30156406;30164175;30164175;30164175;30164175;30164175;30164175;30165901;30175190;30175190;30175190;30175190;30175190;30177214;30177494;30177214;30177214;30177214;30179455;30179455;30179455;30179455;30179455;30180630;30180501;30181021;30180630;30180630;30183553;30183640;30183461	+;+;+;+;+;+;+;+;+;+;+;+;+;+;+;+;+;+;+;+;+;+;+;+;+;+;+;+;+;+;+;+;+;+;+;+	1984	4.93605	5.55304	3.81571	11.8741	12.9161	12.197	4.01419e-09	3.85215e-07	-1.45828
DDAH1	1;1;1;1;1;1;1;1;1;1;1;1;1;1;1;1;1;1;1;1;1;1;1;1;1;1;1;1;1;1;1;1;1;1;1;1;1;1;1;1	85318481;85318485;85318485;85318486;85318486;85321302;85321452;85324740;85324740;85324740;85324740;85324740;85324740;85350415;85350415;85350415;85350415;85350415;85350415;85351506;85351506;85351506;85351506;85351506;85351506;85358748;85358748;85358748;85358748;85358748;85358748;85404381;85464743;85464743;85496166;85496166;85496166;85577984;85577984;85577984	85321568;85321568;85321568;85321568;85318897;85321568;85321568;85324883;85324883;85324883;85324883;85324883;85324883;85350534;85350534;85350534;85350534;85350534;85350534;85351579;85351579;85351579;85351579;85351579;85351579;85358847;85358847;85358847;85358847;85358847;85358847;85404528;85465144;85465140;85496281;85496281;85496281;85578363;85578250;85578250	-;-;-;-;-;-;-;-;-;-;-;-;-;-;-;-;-;-;-;-;-;-;-;-;-;-;-;-;-;-;-;-;-;-;-;-;-;-;-;-	4572	2.824	3.06888	3.08037	1.16382	1.07446	1.61131	3.67959e-07	9.52917e-06	1.13789
DDIAS	11;11;11;11;11;11;11;11;11;11;11;11;11;11;11;11;11;11;11;11;11;11;11;11;11;11;11;11;11;11;11;11;11;11;11;11;11;11;11;11;11;11;11;11;11;11;11;11;11;11;11;11;11;11;11;11;11;11;11;11;11	82899975;82901455;82901698;82901698;82901698;82901727;82901730;82901736;82901736;82901742;82909258;82913283;82913287;82913287;82913287;82913287;82913287;82913287;82913287;82913287;82913655;82913957;82913957;82914689;82914723;82914723;82914723;82914723;82914723;82914723;82914723;82914723;82914723;82914723;82922614;82928777;82928777;82928777;82928777;82928777;82928777;82928777;82928777;82928777;829…	82900153;82901822;82901822;82901822;82901822;82901822;82901822;82901822;82901822;82901822;82909331;82913386;82913386;82913386;82913386;82913386;82913386;82913386;82913386;82913386;82913746;82914031;82914170;82914851;82914851;82914851;82914851;82914851;82914851;82914851;82914851;82914851;82914851;82914851;82922682;82928938;82928938;82928938;82928938;82928891;82928942;82928938;82928938;82928938;829…	+;+;+;+;+;+;+;+;+;+;+;+;+;+;+;+;+;+;+;+;+;+;+;+;+;+;+;+;+;+;+;+;+;+;+;+;+;+;+;+;+;+;+;+;+;+;+;+;+;+;+;+;+;+;+;+;+;+;+;+;+	5339	0.885191	0.851325	0.792145	1.55119	1.88763	1.55449	9.89531e-07	1.92996e-05	-1.06367
DGKG	3;3;3;3;3;3;3;3;3;3;3;3;3;3;3;3;3;3;3;3;3;3;3;3;3;3;3;3;3;3;3;3;3;3;3;3;3;3;3;3;3;3;3;3;3;3;3;3;3;3;3;3;3;3;3;3;3;3;3;3;3;3;3;3;3;3;3;3;3;3;3;3;3;3;3;3;3;3;3;3;3;3;3;3;3;3;3;3;3;3;3;3;3;3;3;3;3;3;3;3;3;3;3;3;3;3;3;3;3;3;3;3;3;3;3;3;3;3;3;3;3;3;3	186105668;186105824;186147201;186149237;186149457;186150165;186158183;186161603;186161603;186161603;186161603;186161603;186164898;186164898;186164898;186164898;186164898;186164898;186188202;186188202;186188202;186188202;186188202;186207424;186211795;186211795;186211795;186211795;186211795;186242504;186242504;186242504;186242504;186242504;186251759;186251759;186251759;186251759;186253093;186253093…	186105712;186105942;186150188;186150188;186150188;186150188;186161663;186161663;186161663;186161663;186161663;186161663;186165018;186165018;186165018;186165018;186165018;186164967;186188379;186188379;186188379;186188379;186188379;186207517;186211885;186211885;186211885;186211885;186211885;186242568;186242637;186242568;186242568;186242568;186251919;186251919;186251919;186251919;186253182;186253182…	-;-;-;-;-;-;-;-;-;-;-;-;-;-;-;-;-;-;-;-;-;-;-;-;-;-;-;-;-;-;-;-;-;-;-;-;-;-;-;-;-;-;-;-;-;-;-;-;-;-;-;-;-;-;-;-;-;-;-;-;-;-;-;-;-;-;-;-;-;-;-;-;-;-;-;-;-;-;-;-;-;-;-;-;-;-;-;-;-;-;-;-;-;-;-;-;-;-;-;-;-;-;-;-;-;-;-;-;-;-;-;-;-;-;-;-;-;-;-;-;-;-;-	10978	0.0621341	0.0495036	0.0192624	0.128991	0.124556	0.148652	0.000213837	0.00119375	-1.72241
DHRS3	1;1;1;1;1;1;1;1;1;1;1;1;1;1;1;1	12567910;12568392;12572728;12572728;12578718;12578718;12579293;12579293;12579768;12580523;12580523;12580523;12595986;12616560;12616560;12617154	12568424;12568424;12572853;12572853;12578956;12578956;12579412;12579412;12580666;12580666;12580666;12580666;12596308;12616696;12616795;12617731	-;-;-;-;-;-;-;-;-;-;-;-;-;-;-;-	3036	0.417251	0.455642	0.278607	1.21553	1.23439	1.27469	4.77213e-07	1.16786e-05	-1.78546
DIRC3	2;2;2;2;2;2;2;2;2;2;2;2;2;2;2;2;2;2;2;2;2;2;2;2;2;2;2;2;2;2;2;2;2	217284019;217317966;217318920;217319167;217325846;217325846;217327997;217327997;217425302;217425302;217425510;217426591;217426591;217426591;217427391;217427391;217427391;217432923;217432923;217432923;217433757;217433948;217433948;217478381;217478381;217599612;217599612;217703900;217713029;217739487;217756021;217756468;217756468	217284863;217318201;217319177;217319177;217325970;217325970;217328152;217328152;217425522;217425522;217425522;217426786;217426786;217426786;217427473;217427473;217427473;217433021;217433021;217433021;217434116;217434216;217434116;217478558;217478558;217600829;217599932;217704074;217713101;217739575;217756147;217756555;217756593	-;-;-;-;-;-;-;-;-;-;-;-;-;-;-;-;-;-;-;-;-;-;-;-;-;-;-;-;-;-;-;-;-	4665	0.229772	0.381257	0.145055	0.055191	0.10856	0.0899535	0.00369972	0.0117576	1.48097
DLEU1_2	13	50104833	50105174	+	342	2.70678	3.32253	2.34959	4.89336	5.77513	5.45332	0.00106773	0.00432454	-1.02745
DLEU2_6	1;12;13	63548977;91632912;50081843	63549112;91633023;50081978	-;-;+	384	4.44081	2.95913	4.62575	8.82805	6.72609	8.01382	0.000223691	0.0012377	-1.04879
DLX1	2;2;2;2;2;2;2;2;2;2;2;2;2;2;2;2;2;2	172084740;172084749;172085226;172085312;172085536;172085557;172085611;172086267;172086654;172086654;172086654;172086654;172087367;172088003;172088003;172088003;172088003;172088003	172084881;172084881;172085990;172085990;172085990;172085990;172085990;172086853;172087138;172086853;172086854;172086853;172087568;172089677;172089312;172089677;172088373;172088051	+;+;+;+;+;+;+;+;+;+;+;+;+;+;+;+;+;+	3656	0.466431	0.351346	0.508992	1.17371	0.941946	1.07127	5.01983e-06	6.60389e-05	-1.34091
DNAH3	16;16;16;16;16;16;16;16;16;16;16;16;16;16;16;16;16;16;16;16;16;16;16;16;16;16;16;16;16;16;16;16;16;16;16;16;16;16;16;16;16;16;16;16;16;16;16;16;16;16;16;16;16;16;16;16;16;16;16;16;16;16;16;16;16;16;16;16;16;16;16;16;16;16;16;16;16;16;16;16;16;16;16;16;16;16;16;16;16;16;16;16;16;16;16;16;16;16;16;16;16;16;16;16;16;16;16;16;16;16;16;16;16;16;16	20933111;20935348;20936649;20941401;20944496;20948483;20952433;20954813;20959179;20963284;20969792;20975233;20979330;20982721;20985077;20987305;20987693;20987942;20996859;20997283;21000224;21000224;21003104;21003104;21019147;21019624;21019624;21021971;21021971;21024596;21024596;21024596;21027027;21027027;21027027;21031045;21031045;21031045;21033974;21033974;21033974;21036714;21036714;21036714;210…	20933507;20935485;20936853;20941543;20944663;20948637;20952549;20955057;20959404;20965425;20969990;20975415;20979546;20982914;20985715;20987448;20987849;20988065;20997462;20997462;21000518;21000518;21003207;21003207;21019869;21019869;21019869;21022100;21022100;21024701;21024701;21024701;21027127;21027127;21027127;21031286;21031286;21031286;21034085;21034085;21034085;21036848;21036848;21036848;210…	-;-;-;-;-;-;-;-;-;-;-;-;-;-;-;-;-;-;-;-;-;-;-;-;-;-;-;-;-;-;-;-;-;-;-;-;-;-;-;-;-;-;-;-;-;-;-;-;-;-;-;-;-;-;-;-;-;-;-;-;-;-;-;-;-;-;-;-;-;-;-;-;-;-;-;-;-;-;-;-;-;-;-;-;-;-;-;-;-;-;-;-;-;-;-;-;-;-;-;-;-;-;-;-;-;-;-;-;-;-;-;-;-;-;-	14960	0.13353	0.142005	0.127217	0.0401574	0.0372378	0.0436338	1.70835e-05	0.000170313	1.63849
DNAJC28	21;21;21;21;21;21;21;21;21	33485530;33487815;33488190;33488208;33488219;33491066;33491066;33491418;33491602	33485748;33489424;33489424;33489424;33489424;33491473;33491473;33491691;33491720	-;-;-;-;-;-;-;-;-	2484	0.961103	0.576785	0.800222	0.276399	0.265042	0.37541	0.000486651	0.00229214	1.2622
DNAJC3-AS1	13;13;13;13	95648733;95672835;95675852;95676496	95648834;95674668;95676925;95676794	-;-;-;-	3010	1.31112	1.26384	1.55963	0.541734	0.504752	0.511181	2.89916e-06	4.35626e-05	1.32394
DNHD1	11;11;11;11;11;11;11;11;11;11;11;11;11;11;11;11;11;11;11;11;11;11;11;11;11;11;11;11;11;11;11;11;11;11;11;11;11;11;11;11;11;11;11;11;11;11;11;11;11;11;11;11;11;11;11;11;11;11;11;11;11;11;11;11;11;11;11;11;11;11;11;11;11;11;11;11;11;11;11;11;11;11;11;11;11;11;11;11;11;11;11;11;11;11;11;11;11;11;11;11;11;11;11;11;11;11;11;11;11;11;11;11;11;11;11;11;11;11;11;11;11;11;11;11;11;11;11;11;11;11;11;11;11;…	6497260;6497296;6497296;6497301;6497305;6497585;6497585;6497585;6497585;6497585;6497771;6497771;6497771;6498216;6498308;6498723;6502753;6502753;6502753;6502753;6508213;6508880;6508880;6508880;6509162;6509162;6509162;6509162;6511273;6511273;6511273;6511273;6519600;6519600;6519600;6519600;6519965;6519965;6519965;6519965;6520238;6520238;6528522;6528522;6528878;6528878;6528977;6533027;6533027;6533027…	6497331;6497331;6497331;6497331;6497331;6497667;6498961;6497667;6497667;6497667;6497844;6498961;6498232;6498961;6498689;6498961;6502926;6502926;6502926;6504200;6509083;6509083;6509083;6509083;6509272;6509272;6509272;6509272;6511429;6511429;6511429;6511429;6519854;6519854;6519854;6519854;6520858;6520102;6520860;6520102;6520289;6520289;6528787;6528787;6529121;6529121;6529121;6533184;6533184;6533184…	+;+;+;+;+;+;+;+;+;+;+;+;+;+;+;+;+;+;+;+;+;+;+;+;+;+;+;+;+;+;+;+;+;+;+;+;+;+;+;+;+;+;+;+;+;+;+;+;+;+;+;+;+;+;+;+;+;+;+;+;+;+;+;+;+;+;+;+;+;+;+;+;+;+;+;+;+;+;+;+;+;+;+;+;+;+;+;+;+;+;+;+;+;+;+;+;+;+;+;+;+;+;+;+;+;+;+;+;+;+;+;+;+;+;+;+;+;+;+;+;+;+;+;+;+;+;+;+;+;+;+;+;+;+;+;+;+;+;+;+;+;+;+;+;+;+;+;+;+;+;+;+;+;+;+;+;+;+;+;+;+;+;+;+;+;+;+;+;+;+;+;+;+;+;+;+;+;+;+;+;+;+;+;+;+;+;+;+;+;+;+;+	19629	0.0843929	0.0780245	0.109884	0.0240471	0.0516007	0.0522578	0.00419764	0.013038	1.02956
DNLZ	9;9;9;9;9	136359480;136361900;136362989;136363487;136363487	136362180;136362180;136363128;136363789;136363719	-;-;-;-;-	3144	2.66545	2.26281	2.83834	6.30563	6.71702	3.64821	0.00011511	0.000736326	-1.18398
DPF1	19;19;19;19;19;19;19;19;19;19;19;19;19;19;19;19;19;19;19;19;19;19;19;19;19;19;19;19;19;19;19;19;19;19;19;19;19;19;19;19;19;19;19;19;19;19;19;19;19;19;19;19;19;19;19;19;19;19;19;19;19;19;19;19;19;19;19;19;19;19;19;19;19;19;19;19;19;19;19;19;19;19;19;19;19;19;19;19;19;19;19;19;19;19;19;19;19;19;19;19;19;19;19;19;19;19;19;19;19;19;19;19;19;19;19;19;19;19;19;19;19;19;19;19;19;19;19;19;19;19;19;19;19;…	38211006;38211009;38211009;38211043;38211700;38211702;38211703;38211717;38211755;38211962;38211974;38212065;38212072;38212280;38212280;38212280;38212280;38212280;38212280;38212280;38212280;38212280;38212280;38212280;38212280;38212280;38213644;38213644;38213644;38213644;38213644;38213644;38213644;38213644;38213644;38213644;38213644;38213644;38213644;38216140;38216140;38216140;38216140;38216140;382…	38212133;38212133;38212133;38212133;38212133;38212133;38212133;38212133;38212133;38212133;38212133;38212133;38212133;38212361;38212361;38212361;38212361;38212361;38212361;38212361;38212361;38212361;38212391;38212361;38212391;38212391;38213979;38213756;38213756;38213756;38213756;38213756;38213756;38213756;38213756;38213756;38213756;38213756;38213756;38216259;38216259;38216259;38216259;38216259;382…	-;-;-;-;-;-;-;-;-;-;-;-;-;-;-;-;-;-;-;-;-;-;-;-;-;-;-;-;-;-;-;-;-;-;-;-;-;-;-;-;-;-;-;-;-;-;-;-;-;-;-;-;-;-;-;-;-;-;-;-;-;-;-;-;-;-;-;-;-;-;-;-;-;-;-;-;-;-;-;-;-;-;-;-;-;-;-;-;-;-;-;-;-;-;-;-;-;-;-;-;-;-;-;-;-;-;-;-;-;-;-;-;-;-;-;-;-;-;-;-;-;-;-;-;-;-;-;-;-;-;-;-;-;-;-;-;-;-;-;-;-;-;-;-;-;-;-;-;-;-;-;-	4800	0.740981	0.699898	0.792986	1.45719	1.52985	1.36963	1.4511e-06	2.56765e-05	-1.04282
DSN1	20;20;20;20;20;20;20;20;20;20;20;20;20;20;20;20;20;20;20;20;20;20;20;20;20;20;20;20;20;20;20;20;20;20;20;20;20;20;20;20;20;20;20;20;20;20;20;20;20;20;20;20;20;20;20;20;20;20;20;20;20;20;20;20;20;20;20;20;20;20;20;20;20;20;20;20;20;20;20;20;20;20;20;20;20;20;20;20;20;20;20;20;20;20;20;20	36751791;36751795;36751795;36751795;36751795;36751795;36751795;36754763;36754763;36754763;36754763;36754763;36754763;36754763;36755682;36755682;36755682;36755682;36755682;36755682;36755682;36758087;36758087;36758087;36758087;36758087;36758087;36758087;36758087;36758087;36758087;36758558;36758558;36758558;36758558;36758558;36758558;36758558;36758558;36758558;36758558;36762461;36762461;36762461;367…	36752897;36752897;36752897;36752897;36752897;36752897;36752897;36754850;36754850;36754850;36754850;36754850;36754850;36754850;36755829;36755829;36755829;36755829;36755829;36755829;36755829;36758161;36758161;36758161;36758161;36758161;36758161;36758161;36758161;36758161;36758161;36758617;36758617;36758617;36758617;36758617;36758617;36758617;36758617;36758617;36758617;36762548;36762548;36762548;367…	-;-;-;-;-;-;-;-;-;-;-;-;-;-;-;-;-;-;-;-;-;-;-;-;-;-;-;-;-;-;-;-;-;-;-;-;-;-;-;-;-;-;-;-;-;-;-;-;-;-;-;-;-;-;-;-;-;-;-;-;-;-;-;-;-;-;-;-;-;-;-;-;-;-;-;-;-;-;-;-;-;-;-;-;-;-;-;-;-;-;-;-;-;-;-;-	2739	2.29468	2.63347	1.97643	4.371	5.34354	5.08986	1.49812e-07	5.03948e-06	-1.18499
DUBR	3;3;3;3;3;3;3;3;3;3;3;3;3	107240692;107240692;107240692;107240721;107241022;107245138;107246008;107285320;107291762;107291762;107325607;107326466;107326466	107241087;107241087;107241087;107241087;107241087;107245508;107248348;107285664;107291930;107291930;107325691;107326701;107326964	+;+;+;+;+;+;+;+;+;+;+;+;+	4206	1.23948	1.30383	1.09603	0.499914	0.710405	0.310396	0.000113988	0.000731298	1.17996
DUSP4	8;8;8;8;8;8;8;8;8	29333064;29336539;29338282;29338282;29340098;29340098;29345370;29347791;29349846	29337411;29337411;29338501;29338501;29340243;29340243;29346074;29348805;29350668	-;-;-;-;-;-;-;-;-	7257	6.5191	6.14068	7.61115	12.104	12.3381	13.9229	4.20847e-09	3.93689e-07	-1.00203
DUSP6	12;12;12;12;12;12;12;12;12;12;12;12	89347232;89348369;89349072;89349482;89350588;89350588;89350588;89351497;89351640;89351640;89351689;89352395	89349561;89349561;89349561;89349561;89351025;89351171;89351025;89351582;89352405;89353271;89352152;89352497	-;-;-;-;-;-;-;-;-;-;-;-	4632	0.126223	0.127991	0.0456526	0.203809	0.328002	0.432839	0.000447931	0.00214664	-1.77704
DUSP7	3;3;3;3;3	52048919;52051632;52053940;52055850;52055850	52051122;52054374;52054374;52056165;52056550	-;-;-;-;-	5648	0.155276	0.139956	0.142273	0.402671	0.260032	0.454041	9.29099e-05	0.000623465	-1.43654
DUX4L37	20	29878636	29879363	-	728	1.13774	1.56086	2.26567	0.648381	0.904348	0.640465	0.00660506	0.0188913	1.11324
DYNC1I1	7;7;7;7;7;7;7;7;7;7;7;7;7;7;7;7;7;7;7;7;7;7;7;7;7;7;7;7;7;7;7;7;7;7;7;7;7;7;7;7;7;7;7;7;7;7;7;7;7;7;7;7;7;7;7;7;7;7;7;7;7;7;7;7;7;7;7;7;7;7;7;7;7;7;7;7;7;7;7;7;7;7;7;7;7;7;7;7;7;7;7;7;7;7;7;7;7;7;7;7;7;7;7;7;7;7;7;7;7;7;7;7;7;7;7;7;7;7;7;7;7;7;7;7;7;7;7;7;7;7;7;7;7;7;7;7;7;7;7;7;7;7	95772506;95772554;95772579;95772590;95772594;95772597;95772598;95772604;95802680;95804218;95804284;95804721;95804721;95804721;95804721;95804721;95804721;95804721;95804721;95804721;95804721;95810392;95810392;95810392;95810392;95810392;95810392;95810392;95810392;95810392;95810392;95813196;95813196;95813247;95813247;95813247;95813247;95813247;95813247;95813247;95813247;95818499;95828057;95828057;958…	95772773;95772773;95772773;95772773;95772773;95772773;95772773;95772773;95802794;95804362;95804374;95804837;95804837;95804837;95804837;95804837;95804837;95804837;95804837;95804837;95804837;95810506;95810506;95810506;95810506;95810506;95810506;95810506;95810506;95810506;95810506;95813337;95813337;95813337;95813337;95813337;95813337;95813337;95813279;95813337;95813337;95818963;95828116;95828128;958…	+;+;+;+;+;+;+;+;+;+;+;+;+;+;+;+;+;+;+;+;+;+;+;+;+;+;+;+;+;+;+;+;+;+;+;+;+;+;+;+;+;+;+;+;+;+;+;+;+;+;+;+;+;+;+;+;+;+;+;+;+;+;+;+;+;+;+;+;+;+;+;+;+;+;+;+;+;+;+;+;+;+;+;+;+;+;+;+;+;+;+;+;+;+;+;+;+;+;+;+;+;+;+;+;+;+;+;+;+;+;+;+;+;+;+;+;+;+;+;+;+;+;+;+;+;+;+;+;+;+;+;+;+;+;+;+;+;+;+;+;+;+	4568	0.181321	0.0973383	0.148135	0.338178	0.210645	0.34704	0.00284622	0.0095211	-1.15184
ECE1	1;1;1;1;1;1;1;1;1;1;1;1;1;1;1;1;1;1;1;1;1;1;1;1;1;1;1;1;1;1;1;1;1;1;1;1;1;1;1;1;1;1;1;1;1;1;1;1;1;1;1;1;1;1;1;1;1;1;1;1;1;1;1;1;1;1;1;1;1;1;1;1;1;1;1;1;1;1;1;1;1;1;1;1;1;1;1;1;1;1;1;1;1;1;1;1;1;1;1;1;1;1;1;1;1;1;1;1;1;1;1;1;1;1;1;1;1;1;1;1;1;1;1;1;1;1;1;1;1;1;1;1	21217247;21218584;21219814;21219859;21219894;21219937;21221747;21221747;21221747;21221747;21221747;21225250;21225250;21225250;21225250;21225250;21227159;21227159;21227159;21227159;21227159;21227931;21227931;21227931;21227931;21227931;21233105;21233558;21233558;21233558;21233558;21233558;21233570;21235850;21235850;21235850;21235850;21235850;21235850;21235850;21236746;21236746;21236746;21236746;212…	21220131;21220131;21220131;21220131;21220131;21220131;21221842;21221842;21222081;21221842;21221842;21225440;21225440;21225440;21225440;21225440;21227226;21227226;21227226;21227226;21227226;21228041;21228041;21228041;21228041;21228041;21233661;21233661;21233661;21233661;21233661;21233661;21233661;21235927;21235927;21235927;21235927;21235927;21235927;21235927;21236844;21236844;21236844;21236844;212…	-;-;-;-;-;-;-;-;-;-;-;-;-;-;-;-;-;-;-;-;-;-;-;-;-;-;-;-;-;-;-;-;-;-;-;-;-;-;-;-;-;-;-;-;-;-;-;-;-;-;-;-;-;-;-;-;-;-;-;-;-;-;-;-;-;-;-;-;-;-;-;-;-;-;-;-;-;-;-;-;-;-;-;-;-;-;-;-;-;-;-;-;-;-;-;-;-;-;-;-;-;-;-;-;-;-;-;-;-;-;-;-;-;-;-;-;-;-;-;-;-;-;-;-;-;-;-;-;-;-;-;-	7265	1.8845	1.78849	2.33439	3.85106	3.60395	4.53744	5.17219e-08	2.33825e-06	-1.07603
ECHDC3	10;10;10;10;10;10;10;10;10;10;10;10;10;10;10;10;10;10;10;10;10;10	11742366;11742366;11742446;11747275;11747349;11747349;11747349;11747450;11749495;11749495;11749495;11749495;11749495;11752137;11755345;11755408;11755408;11755408;11755408;11763224;11763224;11763224	11742746;11742746;11742905;11747470;11747470;11747470;11747470;11747470;11749592;11749592;11749592;11749592;11749592;11752254;11755730;11755581;11755608;11755608;11755608;11763351;11764070;11764070	+;+;+;+;+;+;+;+;+;+;+;+;+;+;+;+;+;+;+;+;+;+	2185	0.579759	0.452216	0.600032	1.11942	1.11253	1.23767	8.2415e-05	0.000568886	-1.16188
EDARADD	1;1;1;1;1;1;1;1;1;1;1;1;1;1;1;1;1;1;1;1;1;1;1;1;1;1	236348257;236348262;236348725;236350704;236394278;236395416;236409216;236409216;236409216;236409216;236414260;236414260;236414260;236414260;236427392;236427392;236427392;236427392;236468231;236468231;236468231;236468231;236482267;236482267;236482267;236482267	236348284;236348284;236348966;236350839;236394505;236395660;236409274;236409274;236409274;236409274;236414299;236414299;236414299;236414299;236427450;236427450;236427450;236427450;236468276;236468276;236468276;236468276;236484914;236482692;236482319;236484837	+;+;+;+;+;+;+;+;+;+;+;+;+;+;+;+;+;+;+;+;+;+;+;+;+;+	3731	0.470113	0.503183	0.510096	1.31114	0.99088	1.34966	1.45776e-06	2.57072e-05	-1.38262
EFNA3	1;1;1;1;1;1;1;1;1;1;1;1	155078872;155085091;155085516;155085522;155085877;155085877;155085877;155086128;155086128;155086413;155086413;155086413	155079069;155085404;155085642;155085642;155085942;155085942;155085942;155086205;155086205;155086923;155086982;155087538	+;+;+;+;+;+;+;+;+;+;+;+	1909	7.63116	7.78983	7.53247	3.619	3.63444	2.63782	2.33291e-07	6.85928e-06	1.12938
EGLN3	14;14;14;14;14;14;14;14;14;14;14;14;14;14;14;14;14;14;14;14;14;14;14;14;14;14;14;14;14;14;14;14;14;14;14;14;14;14;14;14;14;14;14;14	33924231;33925399;33925511;33926960;33926960;33926960;33929076;33929076;33929076;33929099;33931096;33931096;33931096;33931096;33948233;33950396;33950678;33985153;33985381;33987012;33987012;34018601;34092317;34092321;34092321;34096163;34126253;34126253;34127029;34127029;34127029;34127029;34129503;34169491;34169491;34169491;34169491;34169491;34169746;34199487;34222836;34222836;34227759;34462716	33925922;33925922;33925922;33927033;33927033;33927033;33929212;33929212;33929212;33929212;33931336;33931215;33931215;33931215;33951081;33951081;33950826;33985512;33985507;33987162;33987162;34018655;34092402;34092402;34092402;34096415;34126311;34126311;34127144;34127144;34127144;34127144;34130044;34169646;34169646;34169646;34169646;34169646;34169766;34199820;34222953;34222877;34227814;34462774	-;-;-;-;-;-;-;-;-;-;-;-;-;-;-;-;-;-;-;-;-;-;-;-;-;-;-;-;-;-;-;-;-;-;-;-;-;-;-;-;-;-;-;-	7359	1.03284	0.960029	1.12642	2.02339	1.9338	2.04016	4.9166e-08	2.2686e-06	-1.02366
EGR1	5;5	138465490;138466757	138466068;138469315	+;+	3138	1.86317	1.71609	2.27771	3.30926	3.55053	4.72499	2.65444e-06	4.08228e-05	-1.05855
EID2B	19;19;19	39530990;39531337;39532740	39532854;39531513;39532843	-;-;-	1865	2.29895	2.70202	2.42644	1.19645	0.923259	1.22502	2.10064e-05	0.000199261	1.05954
EIF2S3	X;X;X;X;X;X;X;X;X;X;X;X;X;X;X;X;X;X;X;X;X;X;X;X	24054716;24054946;24054971;24055615;24055615;24055615;24057421;24057421;24057633;24057633;24060088;24060088;24062416;24062416;24064201;24065998;24067964;24071558;24071713;24073091;24073091;24073262;24076722;24077344	24055037;24055037;24055037;24055678;24055678;24055678;24057548;24057548;24057754;24057754;24060479;24060182;24062626;24062574;24064335;24066092;24068108;24071727;24071727;24073528;24073263;24073411;24077971;24077408	+;+;+;+;+;+;+;+;+;+;+;+;+;+;+;+;+;+;+;+;+;+;+;+	3472	15.7448	14.329	14.4833	33.2956	36.8157	35.2917	1.26443e-11	6.05232e-09	-1.32534
EIF2S3L	12;12;12	10505602;10505890;10522603	10507210;10507491;10523135	+;+;+	2423	0.22119	0.203898	0.139637	0.495876	0.292616	0.44259	0.00400545	0.0125332	-1.22429
EIF4EBP2	10;10;10	70404379;70419914;70421716	70404546;70420099;70428618	+;+;+	7257	1.63145	1.52496	1.67842	4.36974	4.4942	5.28773	1.72405e-11	7.28852e-09	-1.62985
ELF5	11;11;11;11;11;11;11;11;11;11;11;11;11;11;11;11;11;11;11;11;11;11;11;11;11;11;11;11;11;11;11;11	34478793;34478795;34478796;34480197;34480772;34480772;34480772;34480772;34482430;34482431;34482431;34482431;34482431;34490009;34490009;34490009;34490009;34491597;34493479;34493479;34505629;34505629;34505629;34505629;34505629;34505629;34511544;34511544;34511544;34513677;34513677;34513677	34480314;34480314;34480314;34480314;34480967;34480967;34480967;34480967;34482499;34482499;34482499;34482499;34482499;34490059;34490059;34490059;34490059;34493712;34493712;34493712;34505753;34505753;34505753;34505753;34505753;34505753;34511828;34511799;34511799;34513765;34513805;34513800	-;-;-;-;-;-;-;-;-;-;-;-;-;-;-;-;-;-;-;-;-;-;-;-;-;-;-;-;-;-;-;-	4494	0.910692	0.978418	0.846981	0.286455	0.315536	0.38388	2.54601e-06	3.95871e-05	1.38728
ENO1P1	1	236483165	236484468	+	1304	0.373635	0.454643	0.356763	1.08594	0.737903	1.07268	0.000627667	0.00280564	-1.37664
ENPP5	6;6;6;6;6;6;6;6;6;6;6	46159187;46160415;46164957;46165387;46165387;46167434;46167434;46167434;46170053;46170808;46170808	46161753;46161753;46165563;46165563;46165563;46167551;46168297;46168297;46170114;46170971;46170971	-;-;-;-;-;-;-;-;-;-;-	4264	2.2967	2.5606	2.58874	1.11705	0.98579	1.2575	3.94247e-07	1.0093e-05	1.0631
ENTPD1	10;10;10;10;10;10;10;10;10;10;10;10;10;10;10;10;10;10;10;10;10;10;10;10;10;10;10;10;10;10;10;10;10;10;10;10;10;10;10;10;10;10;10;10;10;10;10;10;10;10;10;10;10;10;10;10;10;10;10;10;10;10;10;10;10;10;10;10;10;10;10;10;10;10;10;10;10	95711779;95755652;95755747;95755752;95755957;95756159;95756179;95823236;95823237;95823237;95823237;95823237;95823237;95823238;95839290;95839300;95839691;95839691;95839691;95839691;95839691;95839691;95839691;95839691;95839691;95842344;95842344;95842344;95842344;95842344;95842344;95842344;95842344;95842344;95843199;95844476;95844476;95844476;95844476;95844476;95844476;95844476;95844476;95844476;958…	95711993;95755766;95755766;95755766;95756255;95756255;95756255;95823364;95823364;95823364;95823364;95823364;95823364;95823364;95839467;95839808;95839808;95839808;95839808;95839808;95839808;95839808;95839808;95839808;95839808;95842494;95842413;95842494;95842494;95842494;95842494;95842494;95842494;95842494;95843301;95844847;95844553;95844635;95844635;95844635;95844635;95844635;95844635;95844635;958…	+;+;+;+;+;+;+;+;+;+;+;+;+;+;+;+;+;+;+;+;+;+;+;+;+;+;+;+;+;+;+;+;+;+;+;+;+;+;+;+;+;+;+;+;+;+;+;+;+;+;+;+;+;+;+;+;+;+;+;+;+;+;+;+;+;+;+;+;+;+;+;+;+;+;+;+;+	6975	0.915066	0.743725	0.709424	0.258389	0.232343	0.213911	1.43972e-07	4.94947e-06	1.6563
EPHB6	7;7;7;7;7;7;7;7;7;7;7;7;7;7;7;7;7;7;7;7;7;7;7;7;7;7;7;7;7;7;7;7;7;7;7;7;7;7;7;7;7;7;7;7;7;7;7;7;7;7;7;7;7;7;7;7;7;7;7;7;7;7;7;7;7;7;7;7;7;7;7;7;7;7;7;7;7;7;7;7;7;7;7;7;7;7;7;7;7;7;7;7;7;7;7;7;7;7;7;7;7;7;7;7;7;7;7;7;7;7;7;7;7;7;7;7;7;7;7;7;7;7;7;7;7;7;7;7;7;7	142855061;142855104;142855124;142855143;142861052;142861052;142861052;142861052;142862000;142862017;142862017;142862017;142862035;142862756;142862756;142862756;142862756;142862756;142862756;142862756;142863127;142863127;142863127;142863131;142863131;142863631;142863631;142863631;142863631;142863966;142863966;142863966;142863966;142863966;142863966;142864534;142865475;142865475;142865475;142865475…	142855385;142855385;142855385;142855385;142861186;142861186;142861186;142861186;142862133;142862133;142862133;142862133;142862133;142862833;142862833;142862833;142862833;142862788;142863327;142862833;142863327;142863327;142863327;142863327;142863327;142863695;142863695;142863695;142863695;142864749;142864749;142864262;142864749;142864749;142864749;142864749;142865630;142865630;142865630;142865630…	+;+;+;+;+;+;+;+;+;+;+;+;+;+;+;+;+;+;+;+;+;+;+;+;+;+;+;+;+;+;+;+;+;+;+;+;+;+;+;+;+;+;+;+;+;+;+;+;+;+;+;+;+;+;+;+;+;+;+;+;+;+;+;+;+;+;+;+;+;+;+;+;+;+;+;+;+;+;+;+;+;+;+;+;+;+;+;+;+;+;+;+;+;+;+;+;+;+;+;+;+;+;+;+;+;+;+;+;+;+;+;+;+;+;+;+;+;+;+;+;+;+;+;+;+;+;+;+;+;+	5325	0.0640477	0.0556671	0.0476536	0.249811	0.209231	0.148853	0.000142033	0.000870047	-1.93789
ERBB4	2;2;2;2;2;2;2;2;2;2;2;2;2;2;2;2;2;2;2;2;2;2;2;2;2;2;2;2;2;2;2;2;2;2;2;2;2;2;2;2;2;2;2;2;2;2;2;2;2;2;2;2;2;2;2;2;2;2;2;2;2;2;2;2;2;2;2;2;2;2;2;2;2;2;2;2;2;2;2;2;2;2;2;2;2;2;2;2;2;2;2;2;2;2;2;2;2;2;2;2;2;2;2;2;2;2;2;2;2;2;2;2;2;2;2;2;2;2;2;2;2;2;2;2;2;2;2;2;2;2;2;2;2;2;2	211375717;211375717;211375721;211386853;211386853;211386853;211387945;211420441;211420441;211420441;211422007;211422007;211422007;211424155;211424155;211424155;211428408;211428408;211428408;211430945;211430945;211430945;211561762;211561903;211561903;211561903;211619177;211619177;211619177;211619177;211619253;211623922;211623922;211623922;211623922;211623922;211630462;211630462;211630462;211630462…	211384060;211384060;211384060;211387150;211387150;211387150;211387992;211420611;211420611;211420611;211422104;211422104;211422104;211424301;211424301;211424301;211428483;211428483;211428483;211431100;211431100;211431100;211562088;211562088;211562088;211562088;211619275;211619275;211619275;211619275;211619275;211624044;211624044;211624044;211624044;211624044;211630594;211630594;211630594;211630594…	-;-;-;-;-;-;-;-;-;-;-;-;-;-;-;-;-;-;-;-;-;-;-;-;-;-;-;-;-;-;-;-;-;-;-;-;-;-;-;-;-;-;-;-;-;-;-;-;-;-;-;-;-;-;-;-;-;-;-;-;-;-;-;-;-;-;-;-;-;-;-;-;-;-;-;-;-;-;-;-;-;-;-;-;-;-;-;-;-;-;-;-;-;-;-;-;-;-;-;-;-;-;-;-;-;-;-;-;-;-;-;-;-;-;-;-;-;-;-;-;-;-;-;-;-;-;-;-;-;-;-;-;-;-;-	13015	0.452967	0.406169	0.571917	0.164852	0.198449	0.146881	1.02926e-06	1.99253e-05	1.4122
ESPN	1;1;1;1;1;1;1;1;1;1;1;1;1;1;1;1;1;1;1;1;1;1;1;1;1;1;1;1;1;1;1;1;1;1;1;1;1;1;1;1;1;1;1;1;1;1;1;1;1;1;1;1;1;1;1;1;1;1;1;1;1;1;1;1;1;1;1;1;1;1;1;1;1;1;1;1;1;1;1;1;1;1;1;1;1;1;1;1;1;1;1;1	6424788;6424788;6428226;6428226;6437300;6437568;6440254;6440254;6440254;6440254;6440378;6440626;6440626;6440626;6440626;6440659;6440934;6440934;6440934;6444481;6444481;6444481;6445664;6445664;6445664;6447331;6447351;6448043;6448043;6448467;6448520;6448641;6448641;6448641;6448641;6448641;6448641;6448641;6448641;6448893;6448893;6448893;6448893;6449055;6450374;6450444;6451317;6451603;6451603;6451603…	6425249;6425249;6428419;6428419;6437506;6437747;6440440;6440440;6440440;6440440;6440440;6440822;6440797;6440808;6440808;6440808;6441065;6441065;6441065;6444682;6444682;6444682;6445757;6445935;6445935;6447459;6447459;6448117;6448117;6448561;6448561;6448802;6448802;6448802;6448802;6448802;6449037;6449091;6449091;6448958;6449091;6449091;6449056;6449091;6450470;6450470;6451370;6451748;6451748;6451748…	+;+;+;+;+;+;+;+;+;+;+;+;+;+;+;+;+;+;+;+;+;+;+;+;+;+;+;+;+;+;+;+;+;+;+;+;+;+;+;+;+;+;+;+;+;+;+;+;+;+;+;+;+;+;+;+;+;+;+;+;+;+;+;+;+;+;+;+;+;+;+;+;+;+;+;+;+;+;+;+;+;+;+;+;+;+;+;+;+;+;+;+	6943	6.22446	6.60341	6.50562	2.80593	3.07085	2.91454	1.09112e-09	1.5803e-07	1.05475
ETNK2	1;1;1;1;1;1;1;1;1;1;1;1;1;1;1;1;1;1;1;1;1;1;1;1;1;1;1;1;1;1;1;1;1;1;1;1;1;1;1;1;1;1;1;1;1;1;1;1;1;1;1;1;1;1	204131062;204131062;204131956;204131962;204134515;204134515;204134515;204134515;204134515;204134538;204134548;204137104;204137104;204137104;204137104;204137104;204137104;204137104;204137112;204137213;204138619;204140035;204140035;204140035;204140035;204140035;204140035;204140035;204140035;204140035;204141025;204141216;204141315;204141315;204141315;204141315;204141315;204141315;204141315;204146642…	204132256;204132256;204132256;204132256;204134588;204134588;204134588;204134588;204134694;204134694;204134588;204137249;204137249;204137249;204137249;204137249;204137249;204137249;204137249;204137249;204138919;204140118;204140118;204140118;204140118;204140118;204140118;204140118;204140118;204140118;204141262;204141287;204141457;204142026;204141457;204141457;204141457;204141457;204141457;204146764…	-;-;-;-;-;-;-;-;-;-;-;-;-;-;-;-;-;-;-;-;-;-;-;-;-;-;-;-;-;-;-;-;-;-;-;-;-;-;-;-;-;-;-;-;-;-;-;-;-;-;-;-;-;-	4472	1.56887	1.50247	1.21052	0.719661	0.441658	0.771537	5.02258e-05	0.000391641	1.04972
ETV4	17;17;17;17;17;17;17;17;17;17;17;17;17;17;17;17;17;17;17;17;17;17;17;17;17;17;17;17;17;17;17;17;17;17;17;17;17;17;17;17;17;17;17;17;17;17;17;17;17;17;17;17;17;17;17;17;17;17;17;17;17;17;17;17;17;17;17;17;17;17;17;17;17;17;17;17;17;17;17;17;17;17;17;17;17;17;17;17;17;17;17;17;17;17;17;17;17;17;17;17	43527844;43527844;43527846;43528278;43528280;43528337;43528499;43529135;43529135;43529135;43529135;43529135;43529135;43529135;43529504;43529504;43529504;43529504;43529504;43529504;43529504;43529884;43529884;43529884;43529884;43529884;43529884;43529884;43530107;43530107;43530107;43530107;43530107;43530107;43530107;43532674;43532674;43532674;43532674;43532674;43532674;43532930;43533187;43533187;435…	43528743;43528743;43528743;43528743;43528743;43528743;43528743;43529236;43529236;43529236;43529236;43529236;43529236;43529236;43529676;43529676;43529676;43529676;43529676;43529676;43529676;43529952;43529952;43529952;43529952;43529952;43529952;43529952;43530434;43530181;43530181;43530181;43530181;43530181;43530181;43532939;43532939;43532939;43532939;43532939;43532939;43532939;43533348;43533348;435…	-;-;-;-;-;-;-;-;-;-;-;-;-;-;-;-;-;-;-;-;-;-;-;-;-;-;-;-;-;-;-;-;-;-;-;-;-;-;-;-;-;-;-;-;-;-;-;-;-;-;-;-;-;-;-;-;-;-;-;-;-;-;-;-;-;-;-;-;-;-;-;-;-;-;-;-;-;-;-;-;-;-;-;-;-;-;-;-;-;-;-;-;-;-;-;-;-;-;-;-	3607	0.162092	0.136969	0.0703509	0.356898	0.505452	0.400721	7.34351e-05	0.000521649	-1.86
ETV5	3;3;3;3;3;3;3;3;3;3;3;3;3;3;3;3;3;3;3;3;3;3;3;3;3;3;3;3;3;3;3;3;3;3;3;3;3;3;3;3;3;3;3;3;3;3;3;3;3;3;3;3;3;3;3;3;3;3;3;3;3;3;3;3;3;3;3;3;3;3;3;3;3;3;3;3;3;3;3;3;3;3;3	186046308;186048252;186048582;186048815;186052030;186052030;186052030;186052030;186057075;186057075;186057075;186057423;186057423;186057423;186064213;186064417;186064417;186064417;186064417;186064443;186065813;186065813;186065813;186065813;186065813;186066005;186077993;186079032;186079817;186079817;186079817;186080017;186080047;186080070;186081046;186081046;186081046;186081046;186081046;186081124…	186048860;186048860;186048860;186048860;186052131;186052131;186052131;186052131;186057244;186057244;186057244;186057491;186057491;186057491;186064476;186064476;186064560;186064476;186064476;186064476;186066072;186065970;186066072;186066072;186066072;186066072;186078214;186079105;186079906;186080104;186080104;186080104;186080104;186080104;186081175;186081175;186081175;186081175;186081175;186081175…	-;-;-;-;-;-;-;-;-;-;-;-;-;-;-;-;-;-;-;-;-;-;-;-;-;-;-;-;-;-;-;-;-;-;-;-;-;-;-;-;-;-;-;-;-;-;-;-;-;-;-;-;-;-;-;-;-;-;-;-;-;-;-;-;-;-;-;-;-;-;-;-;-;-;-;-;-;-;-;-;-;-;-	5802	0.226731	0.229908	0.240547	0.57688	0.829219	0.65093	9.5568e-07	1.89323e-05	-1.63216
FABP6	5;5;5;5;5;5;5;5;5;5;5;5;5;5;5;5;5;5;5;5	160187367;160199049;160213727;160213736;160228473;160229430;160229546;160229546;160232035;160232098;160232098;160232098;160234820;160234820;160234820;160234820;160238606;160238606;160238606;160238606	160187454;160199157;160213819;160213819;160228692;160229624;160229624;160229624;160232273;160232273;160232273;160232273;160234909;160234909;160234909;160234909;160238716;160238716;160238716;160238735	+;+;+;+;+;+;+;+;+;+;+;+;+;+;+;+;+;+;+;+	1164	1.00458	1.14598	0.835678	1.95385	2.1319	1.72243	0.000459895	0.00219119	-1.04591
FADS1	11;11;11;11;11;11;11;11;11;11;11;11;11;11;11;11;11;11;11;11;11;11;11;11;11;11;11;11;11;11;11;11;11;11;11;11;11;11;11;11;11;11;11;11;11;11;11;11;11;11;11;11;11;11;11;11;11;11;11;11;11;11;11;11;11;11;11;11;11;11;11;11;11;11;11;11;11;11;11;11;11;11;11;11;11;11;11;11;11;11;11;11;11;11;11;11;11;11;11;11;11;11;11;11;11;11;11;11;11;11;11;11;11;11;11;11	61799625;61802007;61802058;61802218;61802313;61802801;61802801;61802801;61802801;61802801;61802836;61803032;61803032;61803032;61803032;61803032;61803032;61803363;61803363;61803363;61803363;61803363;61803363;61803426;61803670;61803670;61803670;61803670;61803670;61803670;61803670;61804685;61804685;61804685;61804685;61804685;61804685;61806664;61806664;61806664;61806664;61810727;61810742;61810748;618…	61802462;61802462;61802462;61802462;61802462;61802926;61802926;61802926;61802926;61802926;61802926;61803111;61803111;61803111;61803111;61803111;61803111;61803459;61803459;61803459;61803459;61803459;61803459;61803459;61803767;61803767;61803767;61804680;61803767;61803767;61803767;61804761;61804749;61804761;61804761;61806528;61804761;61806724;61806724;61806724;61806724;61810879;61810879;61810879;618…	-;-;-;-;-;-;-;-;-;-;-;-;-;-;-;-;-;-;-;-;-;-;-;-;-;-;-;-;-;-;-;-;-;-;-;-;-;-;-;-;-;-;-;-;-;-;-;-;-;-;-;-;-;-;-;-;-;-;-;-;-;-;-;-;-;-;-;-;-;-;-;-;-;-;-;-;-;-;-;-;-;-;-;-;-;-;-;-;-;-;-;-;-;-;-;-;-;-;-;-;-;-;-;-;-;-;-;-;-;-;-;-;-;-;-;-	10230	5.25322	4.80041	4.98995	11.5394	11.099	12.8027	1.21434e-11	6.05232e-09	-1.31854
FAM105A	5;5;5;5;5;5;5;5;5;5;5;5;5;5	14581775;14600965;14600965;14601213;14601213;14601351;14602183;14602183;14607330;14607330;14608748;14610141;14610338;14614531	14581958;14601124;14601124;14601244;14601244;14601442;14602332;14602332;14607370;14607458;14609017;14612720;14610441;14615007	+;+;+;+;+;+;+;+;+;+;+;+;+;+	4074	1.6145	1.39458	1.05887	3.202	3.30662	3.52498	3.87434e-08	1.93618e-06	-1.39163
FAM134B	5;5;5;5;5;5;5;5;5;5;5;5;5;5;5;5;5;5;5;5;5;5;5;5;5;5;5;5;5;5;5	16473038;16473053;16473054;16474649;16475231;16477662;16477662;16477662;16477662;16478034;16478034;16478034;16478034;16478850;16478850;16478850;16481009;16481009;16481009;16482997;16483346;16483346;16483346;16508578;16508578;16509343;16565763;16571996;16616079;16616652;16616652	16473346;16475234;16475234;16475234;16475234;16477788;16477788;16477788;16477788;16478098;16478098;16478098;16478065;16478987;16478987;16478987;16481093;16481093;16481093;16483472;16483472;16483472;16483472;16508686;16508998;16509436;16565793;16572102;16616498;16617038;16617058	-;-;-;-;-;-;-;-;-;-;-;-;-;-;-;-;-;-;-;-;-;-;-;-;-;-;-;-;-;-;-	4568	1.37591	1.39518	1.24063	0.573024	0.643021	0.663459	5.67914e-06	7.2576e-05	1.01044
FAM157A	3;3;3;3;3;3;3;3;3;3;3;3;3;3;3;3;3;3;3;3;3;3;3;3	198153287;198157123;198167676;198167739;198169785;198180755;198180755;198181927;198185349;198186449;198186449;198188672;198188672;198189837;198189837;198190289;198198946;198208264;198210271;198210705;198211746;198216072;198218324;198218475	198153409;198157669;198167871;198167871;198170059;198180864;198180864;198182058;198185564;198186514;198186514;198188730;198188730;198189929;198190366;198190365;198199010;198208387;198210368;198210901;198211810;198216262;198218381;198222513	+;+;+;+;+;+;+;+;+;+;+;+;+;+;+;+;+;+;+;+;+;+;+;+	7091	0.426	0.229918	0.435391	0.181544	0.149981	0.138083	0.00080956	0.00345122	1.13011
FAM160A1	4;4;4;4;4;4;4;4;4;4;4;4;4;4;4;4;4;4;4;4;4;4;4;4;4;4;4;4;4;4;4;4;4;4;4;4;4;4;4;4;4;4;4;4;4;4;4;4;4	151409216;151409246;151409246;151409352;151409352;151436435;151454701;151454701;151454701;151454701;151454701;151482524;151482524;151482524;151482524;151482609;151533012;151534695;151534695;151566138;151566138;151566138;151566138;151566138;151566138;151566138;151577450;151577450;151577450;151577450;151577450;151586641;151586641;151588840;151588840;151629702;151629702;151638677;151638677;151646558…	151409465;151409465;151409465;151409465;151409465;151436517;151454808;151454808;151454808;151454808;151454808;151482648;151482648;151482648;151482648;151482648;151533048;151534900;151534776;151566364;151566299;151566364;151566364;151566364;151566364;151566258;151578076;151577471;151577524;151577464;151578076;151586799;151586799;151588926;151588926;151629869;151629869;151638756;151638756;151646748…	+;+;+;+;+;+;+;+;+;+;+;+;+;+;+;+;+;+;+;+;+;+;+;+;+;+;+;+;+;+;+;+;+;+;+;+;+;+;+;+;+;+;+;+;+;+;+;+;+	4932	1.07678	1.38237	1.84366	0.348021	0.585296	0.510502	6.3977e-06	7.96758e-05	1.51017
FAM174B	15;15;15;15;15;15;15;15;15;15;15;15;15;15;15;15;15;15;15;15;15;15;15;15;15;15;15;15;15;15;15;15;15;15	92617443;92617448;92619000;92619058;92619119;92619183;92619238;92619302;92630161;92630214;92630214;92630214;92630214;92630214;92630214;92630214;92630214;92639158;92645514;92653136;92655131;92655316;92655316;92656522;92667898;92699040;92782055;92787914;92787964;92788196;92808844;92809646;92809646;92809646	92619459;92617725;92619459;92619459;92619459;92619459;92619459;92619459;92630345;92630345;92630345;92630345;92630345;92630345;92630345;92630345;92630345;92639244;92645598;92653210;92655404;92655351;92655958;92656631;92668043;92699163;92782141;92788085;92788140;92788472;92809013;92809861;92809798;92809884	-;-;-;-;-;-;-;-;-;-;-;-;-;-;-;-;-;-;-;-;-;-;-;-;-;-;-;-;-;-;-;-;-;-	4657	2.00872	2.36573	2.46109	5.30744	4.6435	5.43651	2.57198e-09	2.80596e-07	-1.25186
FAM184B	4;4;4;4;4;4;4;4;4;4;4;4;4;4;4;4;4;4	17629306;17633689;17635009;17636528;17639250;17642056;17647637;17652830;17658350;17659958;17664562;17688424;17693302;17705000;17705752;17707649;17708892;17781159	17632625;17633888;17635113;17636645;17639396;17642228;17647791;17652983;17658562;17660087;17664659;17688531;17693412;17705206;17705891;17707784;17709644;17781512	-;-;-;-;-;-;-;-;-;-;-;-;-;-;-;-;-;-	6622	0.345807	0.253663	0.274627	0.110161	0.145307	0.112657	0.000545226	0.00250468	1.16512
FAM217B	20;20;20;20;20;20;20;20;20;20;20;20;20;20;20;20	59933764;59937990;59940439;59940459;59942124;59942198;59942198;59942198;59942427;59942427;59942427;59942427;59943940;59943940;59943940;59944396	59933853;59938112;59940535;59940535;59942309;59942309;59942309;59942309;59942512;59942512;59942512;59942512;59944086;59948680;59948680;59945000	+;+;+;+;+;+;+;+;+;+;+;+;+;+;+;+	5323	6.99298	7.92627	7.34936	3.0311	2.82568	2.79422	2.28503e-10	4.64187e-08	1.27981
FAM218A	4	164956948	164959122	+	2175	0.47042	0.840446	0.79724	0.177563	0.349265	0.257246	0.00124289	0.0048891	1.3604
FAM225B	9;9;9;9;9	113103338;113104723;113110910;113110910;113111410	113110153;113110153;113111473;113111016;113111500	-;-;-;-;-	7407	1.40766	1.18059	1.57591	0.399738	0.59484	0.446934	1.63612e-07	5.354e-06	1.45789
FAM234B	12;12;12;12;12;12;12;12;12;12;12;12;12;12;12;12;12;12;12;12;12;12;12;12;12;12;12;12;12;12;12;12;12;12;12;12;12;12;12;12;12;12;12;12;12;12;12	13044284;13044381;13055551;13055551;13058451;13058451;13061575;13061575;13061715;13062180;13062756;13062845;13062845;13062845;13062845;13066640;13066640;13066640;13066829;13067155;13067155;13067155;13068304;13068304;13068304;13068304;13068304;13068630;13068630;13068630;13068630;13071241;13071241;13071241;13071241;13076026;13076026;13076026;13076026;13079789;13079789;13079832;13080625;13080625;130…	13044440;13044440;13055946;13055946;13058549;13058549;13061763;13061763;13061763;13062722;13062975;13062879;13062975;13062975;13062975;13066787;13066787;13066787;13067296;13067296;13067296;13067296;13068374;13068447;13068447;13068447;13068447;13068711;13068711;13068711;13068711;13071396;13071396;13071396;13071396;13076143;13076143;13076143;13076143;13080009;13080009;13080009;13081312;13080914;130…	+;+;+;+;+;+;+;+;+;+;+;+;+;+;+;+;+;+;+;+;+;+;+;+;+;+;+;+;+;+;+;+;+;+;+;+;+;+;+;+;+;+;+;+;+;+;+	6807	0.966281	1.02337	1.29233	0.466493	0.267837	0.431531	1.71246e-06	2.89852e-05	1.40022
FAM46C	1;1	117605934;117622842	117606153;117628372	+;+	5751	2.24506	2.44832	2.12529	0.858071	0.757318	0.66481	6.96454e-09	5.58663e-07	1.4914
FAM49A	2;2;2;2;2;2;2;2;2;2;2;2;2;2;2;2;2;2;2;2;2;2;2;2;2;2;2;2;2;2;2;2;2;2;2;2;2;2;2	16549459;16552936;16555069;16555069;16559460;16559460;16560657;16560990;16560990;16561161;16561161;16561161;16561456;16561456;16561456;16562005;16562005;16563989;16563989;16564005;16564024;16565646;16565646;16565646;16565646;16588050;16588050;16588050;16588050;16622939;16623864;16623864;16623864;16623864;16625728;16665780;16665780;16665991;16666224	16552999;16552999;16555139;16555139;16559586;16559586;16561069;16561069;16561069;16561277;16561277;16561277;16561533;16561482;16561533;16562141;16562141;16564094;16564094;16564094;16564094;16565767;16565767;16565767;16565767;16588129;16588129;16588129;16588129;16623137;16624019;16624019;16624019;16624019;16625769;16665828;16665834;16666086;16666331	-;-;-;-;-;-;-;-;-;-;-;-;-;-;-;-;-;-;-;-;-;-;-;-;-;-;-;-;-;-;-;-;-;-;-;-;-;-;-	5448	0.500814	0.589445	0.613274	0.228418	0.195212	0.111259	1.50736e-05	0.00015512	1.57815
FAM60A	12;12;12;12;12;12;12;12;12;12;12;12;12;12;12;12;12;12;12;12;12;12;12;12;12;12;12;12;12;12;12;12;12;12;12;12;12;12;12;12;12;12;12	31280584;31280584;31280584;31282062;31282639;31282688;31287634;31287634;31287634;31287634;31287634;31287634;31287737;31287760;31293805;31293805;31293805;31293805;31293805;31293805;31293805;31295234;31295234;31295234;31295234;31295234;31295234;31295234;31296910;31298077;31298077;31298077;31298077;31298077;31298077;31303495;31323944;31325226;31326024;31326024;31326024;31326024;31327023	31282871;31282871;31282871;31282871;31282871;31282871;31287784;31287784;31287784;31287784;31287784;31287784;31287784;31287784;31293931;31293931;31293931;31293931;31293931;31293931;31293931;31295333;31295333;31295333;31295333;31295333;31295333;31295333;31297044;31298224;31298224;31298175;31298224;31298224;31298521;31305123;31324162;31325494;31326128;31326199;31326116;31326372;31327058	-;-;-;-;-;-;-;-;-;-;-;-;-;-;-;-;-;-;-;-;-;-;-;-;-;-;-;-;-;-;-;-;-;-;-;-;-;-;-;-;-;-;-	5748	1.3986	1.18612	1.17725	2.44118	2.41411	2.34427	1.15247e-07	4.22737e-06	-1.02125
FAM65A	16;16;16;16;16;16;16;16;16;16;16;16;16;16;16;16;16;16;16;16;16;16;16;16;16;16;16;16;16;16;16;16;16;16;16;16;16;16;16;16;16;16;16;16;16;16;16;16;16;16;16;16;16;16;16;16;16;16;16;16;16;16;16;16;16;16;16;16;16;16;16;16;16;16;16;16;16;16;16;16;16;16;16;16;16;16;16;16;16;16;16;16;16;16;16;16;16;16;16;16;16;16;16;16;16;16;16;16;16;16;16;16;16;16;16;16;16;16;16;16;16;16;16;16;16;16;16;16;16;16;16;16;16;…	67518418;67528288;67528817;67528867;67528870;67528881;67529347;67529637;67529791;67531548;67537454;67537473;67538078;67538424;67538424;67538424;67538424;67538424;67538424;67538424;67538424;67538424;67538424;67538464;67538660;67538672;67538672;67538672;67538672;67538672;67538672;67538672;67538672;67538965;67538990;67538990;67538990;67538990;67538990;67538990;67538990;67538990;67538990;67538990;675…	67518613;67528513;67528914;67528914;67528914;67528914;67529859;67529859;67530087;67531630;67537597;67537597;67538550;67538550;67538550;67538550;67538550;67538544;67538550;67538550;67538550;67538471;67538550;67538550;67538824;67538824;67538824;67538824;67538824;67538824;67538824;67538824;67538824;67539068;67539068;67539068;67539068;67539068;67539068;67538996;67539068;67539068;67539068;67539068;675…	+;+;+;+;+;+;+;+;+;+;+;+;+;+;+;+;+;+;+;+;+;+;+;+;+;+;+;+;+;+;+;+;+;+;+;+;+;+;+;+;+;+;+;+;+;+;+;+;+;+;+;+;+;+;+;+;+;+;+;+;+;+;+;+;+;+;+;+;+;+;+;+;+;+;+;+;+;+;+;+;+;+;+;+;+;+;+;+;+;+;+;+;+;+;+;+;+;+;+;+;+;+;+;+;+;+;+;+;+;+;+;+;+;+;+;+;+;+;+;+;+;+;+;+;+;+;+;+;+;+;+;+;+;+;+;+;+;+;+;+;+;+;+;+;+;+;+;+;+;+;+;+;+;+;+;+;+;+;+;+;+;+;+;+;+;+;+;+;+;+;+;+;+;+;+;+;+;+;+;+;+;+;+;+;+;+;+;+;+;+;+;+;+;+	6729	3.87372	3.67102	4.08533	9.90352	8.82065	9.49979	2.02752e-11	7.91077e-09	-1.36175
FAM72A	1;1;1;1;1;1;1;1;1;1;1;1;1;1;1;1;1;1;1;1;1;1;1;1;1;1;1;1	206186179;206186256;206187123;206187166;206187281;206195752;206195752;206195752;206195752;206195752;206195840;206199807;206199807;206199807;206199807;206199807;206199807;206201281;206201874;206201874;206201874;206201994;206202516;206202610;206203180;206203844;206203844;206204252	206187373;206187373;206187373;206187373;206187373;206195876;206195876;206195876;206195876;206195876;206195876;206199884;206199884;206199884;206199884;206199884;206199884;206202419;206201889;206202005;206202873;206202446;206202827;206202851;206203558;206204093;206204065;206204414	-;-;-;-;-;-;-;-;-;-;-;-;-;-;-;-;-;-;-;-;-;-;-;-;-;-;-;-	3783	0.399255	0.35261	0.31303	0.612528	0.69613	0.764157	0.000208587	0.00117012	-1.04317
FAM72B	1;1;1;1;1;1;1;1;1;1;1;1;1;1;1;1;1;1;1;1;1;1;1;1;1	121167646;121167720;121168232;121168585;121168735;121177208;121177208;121177208;121177208;121177296;121181271;121181271;121181271;121181271;121181271;121181271;121182923;121183338;121183338;121183338;121183338;121183458;121183981;121184075;121185318	121168835;121168835;121168835;121168835;121168835;121177332;121177332;121177332;121177332;121177332;121181348;121181348;121181348;121181348;121181348;121181348;121183398;121183469;121183353;121184314;121184340;121183911;121184292;121184316;121185539	-;-;-;-;-;-;-;-;-;-;-;-;-;-;-;-;-;-;-;-;-;-;-;-;-	3033	1.3815	1.67777	1.21314	2.44761	3.10573	3.24367	2.46022e-06	3.85213e-05	-1.12576
FAM72C	1;1;1;1;1;1;1	143955364;143955878;143964855;143968924;143968924;143970990;143970990	143956481;143956481;143964979;143969001;143969001;143971965;143971965	-;-;-;-;-;-;-	2297	1.86658	1.87122	1.27044	2.97033	3.2851	3.65375	7.18567e-06	8.76058e-05	-1.07348
FAM78A	9;9;9;9;9;9;9;9;9;9;9;9;9	131258076;131258076;131258076;131260789;131262691;131263478;131263478;131263478;131264584;131264584;131270276;131270460;131275857	131261350;131261350;131261350;131261350;131262737;131263599;131264715;131263599;131264627;131264627;131270493;131270523;131276547	-;-;-;-;-;-;-;-;-;-;-;-;-	5499	0.54047	0.56601	0.592204	0.351154	0.193401	0.24589	0.000445666	0.002141	1.00318
FAM83A	8;8;8;8;8;8;8;8;8;8;8;8;8;8;8;8;8;8;8;8;8;8;8;8;8;8;8;8;8;8;8;8;8;8;8	123178960;123179047;123179047;123179098;123179114;123179654;123179764;123180132;123180132;123180132;123180342;123180342;123182026;123182026;123182352;123182681;123182681;123183158;123191803;123191803;123191803;123191803;123194024;123194024;123194024;123194024;123194024;123199853;123207157;123207157;123207157;123207157;123209426;123209426;123209525	123179137;123180229;123180229;123179137;123179137;123179871;123179871;123180229;123180229;123180229;123180719;123180615;123183336;123183336;123182583;123183336;123183336;123183336;123191970;123191970;123191970;123191970;123194148;123194148;123194148;123194148;123194148;123199994;123207425;123207416;123209762;123207416;123210074;123210079;123210078	+;+;+;+;+;+;+;+;+;+;+;+;+;+;+;+;+;+;+;+;+;+;+;+;+;+;+;+;+;+;+;+;+;+;+	6317	0.89469	0.547463	0.71637	2.28243	2.54941	2.32502	1.88417e-09	2.32064e-07	-1.81008
FBLIM1	1;1;1;1;1;1;1;1;1;1;1;1;1;1;1;1;1;1;1;1;1;1;1;1;1;1;1;1;1;1;1;1;1;1;1;1;1;1;1;1;1;1;1;1;1;1;1;1;1;1;1;1;1;1;1;1;1;1;1;1;1;1;1;1;1;1;1;1;1;1;1;1	15756607;15756617;15756641;15756644;15756659;15757946;15757947;15758174;15758174;15758174;15758174;15758174;15758174;15758174;15758419;15758784;15758793;15758797;15764493;15764493;15764493;15764493;15764496;15764496;15764496;15764496;15764496;15764496;15764496;15764499;15764953;15764964;15764964;15764964;15764964;15764964;15764964;15764964;15764964;15764964;15764964;15764964;15764964;15767376;157…	15756732;15756732;15756728;15756732;15756732;15758043;15758043;15758355;15758329;15758329;15758329;15758355;15758355;15758355;15758848;15758848;15758848;15758848;15764685;15764685;15764685;15764685;15764547;15764547;15764685;15764685;15764685;15764685;15764547;15764685;15765233;15765233;15765233;15765233;15765233;15765076;15765233;15765027;15765233;15765035;15765086;15765217;15765073;15767563;157…	+;+;+;+;+;+;+;+;+;+;+;+;+;+;+;+;+;+;+;+;+;+;+;+;+;+;+;+;+;+;+;+;+;+;+;+;+;+;+;+;+;+;+;+;+;+;+;+;+;+;+;+;+;+;+;+;+;+;+;+;+;+;+;+;+;+;+;+;+;+;+;+	4716	1.28107	1.27807	1.18376	2.36575	2.37324	2.56067	1.04091e-07	3.8952e-06	-1.04742
FBN2	5;5;5;5;5;5;5;5;5;5;5;5;5;5;5;5;5;5;5;5;5;5;5;5;5;5;5;5;5;5;5;5;5;5;5;5;5;5;5;5;5;5;5;5;5;5;5;5;5;5;5;5;5;5;5;5;5;5;5;5;5;5;5;5;5;5;5;5;5;5;5;5;5;5;5;5;5;5;5;5;5;5;5;5;5;5;5;5;5;5;5;5;5;5;5;5;5;5;5;5;5;5;5;5;5;5;5;5;5;5;5;5;5;5;5;5;5;5;5;5;5;5;5;5;5;5;5;5;5;5;5;5;5;5;5;5;5;5;5;5;5;5;5;5;5;5;5;5;5;5;5;5;5;5;5;5;5;5;5;5;5;5;5;5;5;5;5;5;5;5;5;5;5;5;5;5;5;5;5;5;5;5;5;5;5;5;5;5;5;5;5;5;5;5;5;5;5;5;5;5…	128257909;128258037;128258037;128261736;128261736;128261736;128263425;128263425;128263425;128271999;128271999;128271999;128273840;128273840;128273840;128274567;128274567;128274567;128276038;128276038;128276038;128277880;128277880;128277880;128278635;128278635;128278635;128280192;128280192;128280192;128286718;128286718;128286718;128287308;128287308;128287308;128288438;128288438;128288438;128289127…	128259829;128259829;128259829;128261907;128261907;128261907;128263656;128263656;128263656;128272118;128272118;128272118;128273968;128273968;128273968;128274683;128274683;128274683;128276160;128276160;128276160;128278005;128278005;128278005;128278841;128278841;128278841;128280317;128280317;128280317;128286849;128286849;128286849;128287430;128287430;128287430;128288557;128288557;128288557;128289252…	-;-;-;-;-;-;-;-;-;-;-;-;-;-;-;-;-;-;-;-;-;-;-;-;-;-;-;-;-;-;-;-;-;-;-;-;-;-;-;-;-;-;-;-;-;-;-;-;-;-;-;-;-;-;-;-;-;-;-;-;-;-;-;-;-;-;-;-;-;-;-;-;-;-;-;-;-;-;-;-;-;-;-;-;-;-;-;-;-;-;-;-;-;-;-;-;-;-;-;-;-;-;-;-;-;-;-;-;-;-;-;-;-;-;-;-;-;-;-;-;-;-;-;-;-;-;-;-;-;-;-;-;-;-;-;-;-;-;-;-;-;-;-;-;-;-;-;-;-;-;-;-;-;-;-;-;-;-;-;-;-;-;-;-;-;-;-;-;-;-;-;-;-;-;-;-;-;-;-;-;-;-;-;-;-;-;-;-;-;-;-;-;-;-;-;-;-;-;-;-…	13196	0.129226	0.142268	0.163453	0.0845473	0.0383779	0.0777333	0.00289289	0.00965656	1.01395
FBXO17	19;19;19;19;19;19;19;19;19;19;19;19;19;19;19;19;19;19;19;19;19;19;19;19;19;19;19;19;19;19	38941401;38942278;38942278;38942531;38942682;38944728;38944969;38944969;38944969;38944969;38944969;38944980;38945752;38946472;38946472;38946472;38946472;38946472;38948567;38948567;38948567;38948567;38948567;38949971;38949971;38949971;38949971;38952573;38975586;38975586	38942751;38942751;38942751;38942751;38942751;38945104;38945104;38945104;38945104;38946716;38945104;38945370;38947418;38946567;38946605;38947046;38946567;38946567;38948603;38948678;38948678;38948678;38948678;38950166;38950336;38950336;38950336;38952687;38975702;38975910	-;-;-;-;-;-;-;-;-;-;-;-;-;-;-;-;-;-;-;-;-;-;-;-;-;-;-;-;-;-	4960	0.225929	0.139448	0.110848	0.285497	0.255259	0.423017	0.00349199	0.0112437	-1.10953
FCGR1A	1;1;1;1;1;1;1;1;1;1;1;1;1;1	149782671;149782690;149782728;149783170;149783170;149784003;149788366;149788366;149790054;149790054;149790368;149791237;149791237;149791237	149782774;149782774;149782774;149783190;149783951;149784257;149788617;149788617;149790338;149790338;149790405;149791675;149792518;149791390	+;+;+;+;+;+;+;+;+;+;+;+;+;+	2998	0.438791	0.494375	0.536064	0.128819	0.0844621	0.248837	0.000436293	0.00210438	1.57026
FERMT2	14;14;14;14;14;14;14;14;14;14;14;14;14;14;14;14;14;14;14;14;14;14;14;14;14;14;14;14;14;14;14;14;14;14;14;14;14;14;14;14;14;14;14;14;14;14;14;14;14;14;14;14;14;14;14;14;14;14;14;14;14;14;14;14;14;14;14;14;14;14;14;14;14;14;14;14;14;14;14;14;14;14;14;14;14;14;14;14;14;14;14;14;14;14;14;14;14;14;14;14;14;14;14;14;14;14;14;14;14;14;14;14;14;14;14;14;14;14;14;14;14;14;14;14;14;14;14;14;14;14;14;14;14;…	52857268;52857268;52857271;52857271;52857272;52857275;52857531;52858377;52859306;52859488;52859573;52859573;52859573;52859573;52859573;52859573;52859573;52859573;52860341;52860341;52860341;52860341;52860341;52860341;52860341;52860341;52860341;52860341;52861014;52861014;52861014;52861014;52861014;52861014;52861587;52862591;52864401;52864401;52864401;52864401;52864401;52864401;52864401;52864401;528…	52858550;52858550;52862184;52858550;52858550;52858550;52858550;52858550;52859714;52859714;52859714;52859714;52859714;52859714;52859714;52859714;52859714;52859714;52860465;52860465;52860465;52860465;52860465;52861303;52860465;52860465;52860465;52860465;52861034;52861034;52861034;52861034;52861034;52861034;52861610;52863677;52864622;52864521;52864622;52864622;52864622;52864622;52864622;52864622;528…	-;-;-;-;-;-;-;-;-;-;-;-;-;-;-;-;-;-;-;-;-;-;-;-;-;-;-;-;-;-;-;-;-;-;-;-;-;-;-;-;-;-;-;-;-;-;-;-;-;-;-;-;-;-;-;-;-;-;-;-;-;-;-;-;-;-;-;-;-;-;-;-;-;-;-;-;-;-;-;-;-;-;-;-;-;-;-;-;-;-;-;-;-;-;-;-;-;-;-;-;-;-;-;-;-;-;-;-;-;-;-;-;-;-;-;-;-;-;-;-;-;-;-;-;-;-;-;-;-;-;-;-;-;-;-;-;-;-	8510	2.03247	2.07836	2.33081	4.50793	4.89772	4.98037	2.25273e-10	4.64187e-08	-1.23987
FKBP7	2;2;2;2;2;2;2;2;2;2;2;2;2;2;2;2;2;2;2;2;2;2;2;2;2;2;2;2;2;2	178463664;178465256;178465599;178465691;178465699;178465745;178465770;178467807;178469652;178469652;178469652;178469652;178469652;178469652;178473029;178473029;178473029;178477062;178477062;178477062;178477062;178477062;178478279;178478279;178478279;178478279;178478279;178478279;178478279;178478279	178465931;178465931;178465931;178465931;178465931;178465931;178465931;178467896;178469782;178469785;178469785;178469782;178469785;178469785;178473142;178473142;178473142;178477213;178477213;178477213;178477213;178477213;178478499;178478317;178478595;178478553;178478600;178478553;178478558;178478575	-;-;-;-;-;-;-;-;-;-;-;-;-;-;-;-;-;-;-;-;-;-;-;-;-;-;-;-;-;-	3080	0.189826	0.208526	0.30209	0.473693	0.394624	0.681222	0.00133338	0.00516127	-1.2087
FLT4	5;5;5;5;5;5;5;5;5;5;5;5;5;5;5;5;5;5;5;5;5;5;5;5;5;5;5;5;5;5;5;5;5;5;5;5;5;5;5;5;5;5;5;5;5;5;5;5;5;5;5;5;5;5;5;5;5;5;5;5;5;5;5;5;5;5;5;5;5;5;5;5;5;5;5;5;5;5;5;5;5;5;5;5;5;5;5;5;5;5;5;5;5;5;5;5;5;5;5;5;5;5;5;5;5;5;5;5;5;5;5;5;5;5;5;5;5;5;5;5;5;5;5;5;5;5;5;5;5;5;5;5;5;5;5;5;5;5;5;5;5;5;5;5;5;5;5;5;5;5;5;5;5;5;5;5;5;5;5;5;5;5;5;5;5;5;5;5;5;5;5;5;5;5;5;5;5;5;5;5;5	180601506;180603089;180607965;180607965;180607968;180608965;180608968;180608968;180608968;180608968;180608968;180609905;180609905;180609905;180609905;180609905;180611331;180611331;180611331;180611331;180611331;180611331;180612403;180612506;180612506;180612506;180612506;180612506;180613011;180613011;180613011;180613011;180613011;180613011;180614068;180614068;180614068;180614068;180614076;180614086…	180603390;180603390;180608284;180608284;180608159;180609053;180609053;180609053;180610025;180609053;180609053;180610025;180610025;180610025;180610025;180610025;180611479;180611479;180611479;180611479;180611716;180611479;180612611;180612611;180612611;180612611;180612611;180612611;180613393;180613110;180613110;180613110;180614179;180613110;180614179;180614179;180614179;180614179;180614179;180614179…	-;-;-;-;-;-;-;-;-;-;-;-;-;-;-;-;-;-;-;-;-;-;-;-;-;-;-;-;-;-;-;-;-;-;-;-;-;-;-;-;-;-;-;-;-;-;-;-;-;-;-;-;-;-;-;-;-;-;-;-;-;-;-;-;-;-;-;-;-;-;-;-;-;-;-;-;-;-;-;-;-;-;-;-;-;-;-;-;-;-;-;-;-;-;-;-;-;-;-;-;-;-;-;-;-;-;-;-;-;-;-;-;-;-;-;-;-;-;-;-;-;-;-;-;-;-;-;-;-;-;-;-;-;-;-;-;-;-;-;-;-;-;-;-;-;-;-;-;-;-;-;-;-;-;-;-;-;-;-;-;-;-;-;-;-;-;-;-;-;-;-;-;-;-;-;-;-;-;-;-;-	8852	0.0330244	0.0167435	0.038222	0.12119	0.114423	0.126414	6.66908e-05	0.000485653	-2.08008
FNBP1P1	2;2	74120680;74122996	74122450;74123218	+;+	1994	1.29502	1.46182	1.78163	0.645602	0.939723	0.467662	0.000630094	0.00281357	1.07411
FOS	14;14;14;14;14;14;14;14;14;14;14;14;14;14;14;14;14;14;14;14;14;14;14;14;14;14	75278774;75278826;75278828;75278828;75278828;75278977;75279237;75279643;75279670;75279877;75279877;75279877;75279877;75279906;75279978;75280193;75280560;75280560;75280560;75280560;75280570;75280783;75280783;75280783;75280783;75280783	75279123;75279123;75279128;75279123;75279123;75279123;75279531;75280128;75280128;75280128;75280374;75280128;75280128;75280128;75280128;75280667;75280789;75280667;75280607;75280667;75280667;75281587;75281684;75281157;75281636;75282230	+;+;+;+;+;+;+;+;+;+;+;+;+;+;+;+;+;+;+;+;+;+;+;+;+;+	3238	1.42946	1.1901	1.16246	0.357813	0.735097	0.633582	0.000283558	0.00149593	1.06119
FRAS1	4;4;4;4;4;4;4;4;4;4;4;4;4;4;4;4;4;4;4;4;4;4;4;4;4;4;4;4;4;4;4;4;4;4;4;4;4;4;4;4;4;4;4;4;4;4;4;4;4;4;4;4;4;4;4;4;4;4;4;4;4;4;4;4;4;4;4;4;4;4;4;4;4;4;4;4;4;4;4;4;4;4;4;4;4;4;4;4;4;4;4;4;4;4;4;4;4;4;4;4;4;4;4;4;4;4;4;4;4;4;4;4;4;4;4;4;4;4;4;4;4;4;4;4;4;4;4;4;4;4;4;4;4;4;4;4;4;4;4;4;4;4;4;4;4;4;4;4;4;4;4;4;4;4;4;4;4;4;4;4;4;4;4;4;4;4;4;4;4;4;4;4	78057570;78057570;78057604;78057980;78065985;78065985;78065985;78065985;78068553;78070462;78237510;78237510;78237510;78245231;78245233;78245233;78245233;78252392;78252392;78252392;78252392;78255242;78255242;78255242;78255242;78255246;78265025;78265025;78265025;78265025;78265025;78266834;78266834;78266834;78266834;78266834;78267241;78267241;78267241;78267241;78267241;78278655;78278655;78278655;782…	78058085;78058085;78058085;78058085;78066016;78066016;78066016;78066016;78068689;78072107;78237617;78237617;78237617;78245325;78245325;78245325;78245325;78252551;78252551;78252551;78252551;78255375;78255375;78255375;78255375;78255375;78265108;78265108;78265108;78265108;78265108;78266935;78266935;78266935;78266935;78266935;78267432;78267432;78267295;78267432;78267432;78278744;78278744;78278744;782…	+;+;+;+;+;+;+;+;+;+;+;+;+;+;+;+;+;+;+;+;+;+;+;+;+;+;+;+;+;+;+;+;+;+;+;+;+;+;+;+;+;+;+;+;+;+;+;+;+;+;+;+;+;+;+;+;+;+;+;+;+;+;+;+;+;+;+;+;+;+;+;+;+;+;+;+;+;+;+;+;+;+;+;+;+;+;+;+;+;+;+;+;+;+;+;+;+;+;+;+;+;+;+;+;+;+;+;+;+;+;+;+;+;+;+;+;+;+;+;+;+;+;+;+;+;+;+;+;+;+;+;+;+;+;+;+;+;+;+;+;+;+;+;+;+;+;+;+;+;+;+;+;+;+;+;+;+;+;+;+;+;+;+;+;+;+;+;+;+;+;+;+	20379	0.530757	0.523646	0.809368	0.256889	0.203777	0.347766	6.18574e-05	0.000457265	1.12443
FREM1	9;9;9;9;9;9;9;9;9;9;9;9;9;9;9;9;9;9;9;9;9;9;9;9;9;9;9;9;9;9;9;9;9;9;9;9;9;9;9;9;9;9;9;9;9;9;9;9;9;9;9;9;9;9;9;9;9;9;9;9;9;9;9;9;9;9;9;9;9;9;9;9;9;9;9;9;9;9;9;9;9;9;9;9;9;9;9;9;9;9;9;9;9;9;9;9;9;9;9;9;9;9;9;9;9;9;9;9;9;9;9;9;9;9;9;9;9;9;9;9;9;9;9;9;9;9;9;9;9;9;9;9;9;9;9;9;9;9;9;9;9;9;9;9;9;9	14734666;14737152;14737200;14737366;14737396;14740149;14740149;14740149;14740149;14740149;14746353;14746353;14746353;14746353;14746353;14746923;14746923;14746923;14746923;14746923;14747264;14747264;14747264;14747264;14747264;14747681;14747681;14747681;14747681;14747681;14748401;14748401;14748401;14748401;14750127;14750127;14750127;14750127;14751705;14756374;14756374;14756374;14756374;14756374;147…	14737595;14737595;14737595;14737595;14737595;14740234;14740234;14740234;14740234;14740234;14746468;14746468;14746468;14746468;14746468;14747051;14747051;14747051;14747051;14747051;14747428;14747428;14747428;14747428;14747428;14747728;14747728;14747728;14747728;14747728;14748639;14748639;14748639;14748639;14750276;14750276;14750276;14750276;14751852;14756446;14756446;14756446;14756446;14756446;147…	-;-;-;-;-;-;-;-;-;-;-;-;-;-;-;-;-;-;-;-;-;-;-;-;-;-;-;-;-;-;-;-;-;-;-;-;-;-;-;-;-;-;-;-;-;-;-;-;-;-;-;-;-;-;-;-;-;-;-;-;-;-;-;-;-;-;-;-;-;-;-;-;-;-;-;-;-;-;-;-;-;-;-;-;-;-;-;-;-;-;-;-;-;-;-;-;-;-;-;-;-;-;-;-;-;-;-;-;-;-;-;-;-;-;-;-;-;-;-;-;-;-;-;-;-;-;-;-;-;-;-;-;-;-;-;-;-;-;-;-;-;-;-;-;-;-	10762	0.099599	0.169854	0.117894	0.0239236	0.0188231	0.0259947	1.80792e-05	0.000177858	2.3735
FREM2	13;13;13;13;13;13;13;13;13;13;13;13;13;13;13;13;13;13;13;13;13;13;13;13;13;13;13;13	38687129;38697698;38764304;38769578;38783070;38784557;38821696;38846573;38846573;38848461;38848461;38850038;38850038;38850944;38851686;38856126;38857875;38859287;38861431;38864275;38872742;38874482;38876022;38876248;38877117;38878134;38878831;38880284	38692517;38697787;38764450;38769808;38783195;38784808;38821848;38846722;38846722;38848670;38848670;38850235;38850235;38851108;38851868;38856256;38858033;38859590;38861562;38864606;38872934;38874586;38876149;38876382;38877243;38878321;38878977;38887131	+;+;+;+;+;+;+;+;+;+;+;+;+;+;+;+;+;+;+;+;+;+;+;+;+;+;+;+	16223	2.23744	2.16219	2.92239	0.809392	0.861591	0.988677	4.37704e-09	4.03202e-07	1.38045
FRMD4B	3;3;3;3;3;3;3;3;3;3;3;3;3;3;3;3;3;3;3;3;3;3;3;3;3;3;3;3;3;3;3;3;3;3;3;3;3;3;3;3;3;3;3;3;3;3;3;3;3;3;3;3;3;3;3;3;3;3;3;3;3;3;3;3;3;3;3;3;3;3;3;3;3;3;3;3;3;3;3;3;3;3;3;3;3;3;3;3;3;3;3;3;3;3;3;3;3;3;3;3;3;3;3;3;3;3;3;3;3;3;3;3;3;3;3;3;3;3;3;3;3;3;3;3	69169990;69170807;69176524;69176524;69180899;69180899;69182598;69182598;69187770;69187770;69189896;69189896;69193648;69193648;69195022;69195022;69195231;69195231;69195249;69196255;69196255;69196255;69196719;69196896;69196900;69196900;69196900;69197715;69198697;69198698;69198698;69198698;69198698;69198698;69198726;69198986;69200371;69200371;69200812;69216263;69216263;69216263;69216263;69216263;692…	69171981;69171981;69176656;69176656;69181710;69181710;69182717;69182717;69187917;69187917;69189952;69189952;69193873;69193873;69195141;69195141;69195364;69195364;69195364;69196396;69196396;69196396;69197038;69197038;69197038;69197038;69197038;69198774;69198774;69198774;69198774;69198774;69198774;69198774;69198774;69199270;69200521;69200848;69200898;69216349;69216349;69216349;69216349;69216349;692…	-;-;-;-;-;-;-;-;-;-;-;-;-;-;-;-;-;-;-;-;-;-;-;-;-;-;-;-;-;-;-;-;-;-;-;-;-;-;-;-;-;-;-;-;-;-;-;-;-;-;-;-;-;-;-;-;-;-;-;-;-;-;-;-;-;-;-;-;-;-;-;-;-;-;-;-;-;-;-;-;-;-;-;-;-;-;-;-;-;-;-;-;-;-;-;-;-;-;-;-;-;-;-;-;-;-;-;-;-;-;-;-;-;-;-;-;-;-;-;-;-;-;-;-	9993	0.385174	0.59327	0.584047	0.150294	0.187512	0.116646	1.53077e-06	2.67235e-05	1.70417
FRMD6-AS1	14	51649516	51651744	-	2229	0.896188	0.531947	0.910742	0.327271	0.408965	0.29285	0.00207007	0.00734741	1.10857
FSIP2	2;2;2;2;2;2;2;2;2;2;2;2;2;2;2;2;2;2;2;2;2;2;2;2;2;2;2;2;2;2;2;2;2;2;2;2;2;2;2;2;2;2;2;2;2;2;2;2;2;2;2;2;2;2;2;2;2;2;2;2;2;2;2;2;2;2;2;2;2;2;2;2;2;2	185738628;185738895;185739286;185739346;185739346;185743133;185743133;185743133;185743183;185744322;185744322;185744322;185745429;185745429;185745540;185746669;185746669;185746669;185747313;185747313;185747313;185753722;185753722;185753722;185756192;185756192;185760988;185760988;185760988;185761972;185761972;185761972;185763183;185763183;185763183;185764502;185764502;185764502;185782705;185782705…	185738993;185738993;185739471;185739471;185739471;185743294;185743294;185743294;185743294;185745067;185744411;185744411;185745568;185745568;185745568;185746810;185746810;185746810;185747423;185747423;185747423;185753848;185753842;185753842;185756278;185756278;185761103;185761103;185761103;185762017;185762017;185762017;185763289;185763289;185763289;185766549;185764565;185764565;185782762;185782762…	+;+;+;+;+;+;+;+;+;+;+;+;+;+;+;+;+;+;+;+;+;+;+;+;+;+;+;+;+;+;+;+;+;+;+;+;+;+;+;+;+;+;+;+;+;+;+;+;+;+;+;+;+;+;+;+;+;+;+;+;+;+;+;+;+;+;+;+;+;+;+;+;+;+	23761	0.397798	0.457431	0.501936	0.0740437	0.123619	0.105963	2.67192e-09	2.86261e-07	2.09044
FUT4	11	94543840	94549898	+	6059	0.353816	0.472927	0.286185	0.0991507	0.108659	0.0769531	1.56107e-05	0.000157945	1.86796
FUT9	6;6;6;6;6;6	96015984;96015984;96020834;96036644;96114039;96203148	96016212;96016212;96020973;96037439;96114127;96215612	+;+;+;+;+;+	13719	2.44693	2.58565	3.15984	1.02906	1.06315	1.22351	4.83207e-09	4.27024e-07	1.22403
FXYD4	10;10;10;10;10;10;10;10;10;10;10;10;10;10;10;10;10;10;10;10;10;10;10;10;10;10;10;10;10;10	43371642;43371644;43371653;43372727;43372727;43373462;43373515;43374469;43374470;43374470;43374470;43374613;43374613;43374613;43374613;43375499;43375499;43375499;43375695;43375695;43375695;43375695;43376032;43376032;43376032;43376032;43376147;43376147;43376147;43376147	43371697;43371697;43371697;43372772;43372772;43373783;43373783;43374502;43374502;43374502;43374502;43374639;43374639;43374639;43374639;43375573;43375573;43375573;43375734;43375734;43375734;43375734;43376069;43376069;43376069;43376069;43376332;43376335;43376335;43376332	+;+;+;+;+;+;+;+;+;+;+;+;+;+;+;+;+;+;+;+;+;+;+;+;+;+;+;+;+;+	827	0.353485	0.597395	1.0228	2.33494	1.10228	1.74777	0.0017553	0.00645274	-1.45353
GAL	11;11;11;11;11;11;11;11	68683779;68684341;68684475;68684924;68685594;68688014;68688849;68690917	68684126;68684638;68684732;68685004;68685648;68688100;68688926;68691175	+;+;+;+;+;+;+;+	1300	0.562177	0.494046	0.487992	1.84847	1.48035	1.7933	3.44702e-06	4.97861e-05	-1.81078
GALNTL6	4;4;4;4;4;4;4;4;4;4;4;4;4;4;4;4;4;4;4;4;4;4;4;4;4;4;4;4;4;4;4;4;4;4;4;4;4;4;4;4;4;4;4;4;4;4;4	171812254;171813503;171813523;171813523;171814412;171814412;171814412;171814412;171815994;171816038;172052445;172229656;172229656;172266154;172311614;172311614;172311614;172348523;172348523;172348523;172425284;172545649;172666785;172809360;172809361;172809361;172813540;172813540;172813540;172882790;172882790;172882790;172931161;172931161;172931161;172952037;172952037;172952037;173009178;173009178…	171813990;171813990;171813990;171813990;171814718;171814718;171815579;171814718;171816353;171816191;172052531;172229764;172229764;172266349;172311752;172311752;172311752;172348689;172348689;172348689;172425326;172545748;172669207;172809546;172809546;172809546;172813723;172813723;172813723;172882907;172882907;172882907;172931268;172931268;172931268;172952258;172952258;172952258;173009294;173009294…	+;+;+;+;+;+;+;+;+;+;+;+;+;+;+;+;+;+;+;+;+;+;+;+;+;+;+;+;+;+;+;+;+;+;+;+;+;+;+;+;+;+;+;+;+;+;+	9242	0.75914	0.582677	0.695572	0.218223	0.219188	0.196755	7.69672e-08	3.09491e-06	1.59832
GAPDHS	19;19;19;19;19;19;19;19;19;19;19;19;19;19;19;19;19;19;19;19;19;19;19	35533412;35533455;35536783;35536813;35538307;35538307;35538307;35538577;35538577;35538577;35542319;35542319;35542319;35542490;35542490;35542490;35542945;35542945;35542945;35543340;35543665;35544909;35545098	35533594;35533594;35536990;35536990;35538403;35538403;35538403;35538683;35538683;35538683;35542409;35542409;35542409;35542608;35542608;35542608;35543026;35542989;35543026;35543491;35543827;35545006;35545316	+;+;+;+;+;+;+;+;+;+;+;+;+;+;+;+;+;+;+;+;+;+;+	1519	0.384901	0.227671	0.835272	1.12998	1.1669	1.07433	0.00261295	0.0088987	-1.2575
GBP3	1;1;1;1;1;1;1;1;1;1;1;1;1;1;1;1;1;1;1;1;1;1;1;1;1;1;1;1;1;1;1;1;1;1;1;1;1;1;1;1;1;1;1;1;1;1;1;1;1;1;1;1;1;1;1;1;1;1;1;1;1;1;1;1;1;1;1;1;1;1;1;1;1	89006666;89006679;89006680;89007270;89007769;89008844;89008935;89008947;89008947;89008947;89008947;89008947;89009392;89009392;89009392;89009392;89009392;89009392;89009392;89010904;89010904;89010904;89010904;89010904;89011747;89011747;89011747;89011747;89011747;89013185;89013185;89013185;89013185;89013185;89013198;89014083;89014083;89014083;89014083;89014102;89014405;89014547;89014547;89014547;890…	89007852;89007852;89007852;89007852;89007852;89009140;89009140;89009140;89009140;89009140;89009140;89009140;89009494;89009494;89009494;89009494;89009494;89009494;89009494;89011116;89011116;89011116;89011116;89011116;89011835;89012027;89012027;89012027;89012027;89013427;89013427;89013427;89014279;89013427;89013299;89014279;89014279;89014279;89014279;89014279;89014656;89014656;89014656;89014656;890…	-;-;-;-;-;-;-;-;-;-;-;-;-;-;-;-;-;-;-;-;-;-;-;-;-;-;-;-;-;-;-;-;-;-;-;-;-;-;-;-;-;-;-;-;-;-;-;-;-;-;-;-;-;-;-;-;-;-;-;-;-;-;-;-;-;-;-;-;-;-;-;-;-	4297	0.430867	0.160964	0.374009	0.738984	0.754289	0.802959	0.000121823	0.000768989	-1.31958
GBX2	2;2;2;2;2;2;2	236165236;236165729;236165734;236167138;236167138;236167449;236167449	236166437;236166437;236166437;236167174;236167329;236168009;236168369	-;-;-;-;-;-;-	2315	0.315693	0.170729	0.328841	0.42633	0.568782	0.584082	0.00710582	0.0200522	-1.01082
GDPD2	X;X;X;X;X;X;X;X;X;X;X;X;X;X;X;X;X;X;X;X;X;X;X;X;X;X;X;X;X;X;X;X;X;X;X;X;X;X;X;X;X;X;X;X;X;X;X;X;X;X;X;X;X;X;X;X;X;X;X;X;X;X;X;X;X;X;X;X;X;X;X;X;X	70423031;70423031;70423031;70423141;70424976;70424976;70425354;70425354;70425354;70425763;70425763;70425763;70425763;70425821;70426052;70426052;70426052;70426052;70426052;70426371;70426371;70426371;70426371;70426371;70426648;70426648;70426648;70426648;70426866;70426866;70426866;70426866;70426866;70427137;70427137;70427137;70427137;70427137;70427313;70427313;70427313;70427313;70427313;70429493;704…	70423382;70423382;70423382;70423382;70425089;70425089;70425457;70425457;70425457;70425856;70425856;70425856;70425856;70425856;70426111;70426111;70426111;70426111;70426111;70426469;70426469;70426469;70426469;70426469;70426741;70426741;70426741;70426741;70427011;70427011;70427011;70427011;70427011;70427219;70427219;70427219;70427219;70427219;70427463;70427463;70427463;70427463;70427463;70430063;704…	+;+;+;+;+;+;+;+;+;+;+;+;+;+;+;+;+;+;+;+;+;+;+;+;+;+;+;+;+;+;+;+;+;+;+;+;+;+;+;+;+;+;+;+;+;+;+;+;+;+;+;+;+;+;+;+;+;+;+;+;+;+;+;+;+;+;+;+;+;+;+;+;+	2638	0.424794	0.524385	0.416834	0.113865	0.0191977	0.106048	6.76e-05	0.00048999	2.35613
GINS3	16;16;16;16;16;16;16;16;16;16;16;16;16;16;16;16;16;16;16;16;16;16;16;16;16;16	58295080;58295116;58295189;58295391;58295397;58299886;58329863;58329863;58368044;58386621;58386621;58386621;58387295;58392230;58392394;58392394;58392394;58392698;58393554;58395102;58402942;58403098;58403098;58404499;58404499;58404499	58295534;58295534;58295309;58295534;58295534;58299973;58329949;58329949;58368283;58386702;58386781;58386758;58387370;58392574;58392787;58392787;58392787;58392787;58393673;58395218;58406143;58403331;58403331;58406144;58405481;58406036	+;+;+;+;+;+;+;+;+;+;+;+;+;+;+;+;+;+;+;+;+;+;+;+;+;+	5105	0.916222	1.07422	0.828454	1.9165	1.6567	1.78101	1.67558e-06	2.86026e-05	-1.01426
GLO1	6;6;6;6;6;6;6;6;6	38675925;38675943;38682012;38682012;38682808;38682808;38684374;38686892;38702971	38677383;38677383;38682101;38682101;38682875;38683215;38684514;38686974;38703141	-;-;-;-;-;-;-;-;-	2352	13.5063	14.1366	13.2884	31.0703	26.9366	25.2755	2.3241e-09	2.604e-07	-1.1093
GLOD5	X;X;X;X;X;X;X;X;X;X;X;X;X	48761750;48761751;48762298;48765835;48765835;48765835;48765872;48770924;48770927;48770927;48773310;48773310;48773310	48761853;48761853;48762353;48765972;48765972;48766237;48765972;48771082;48771082;48771082;48773648;48773646;48773646	+;+;+;+;+;+;+;+;+;+;+;+;+	1061	1.01026	1.53662	1.23569	0.647103	0.572782	0.439452	0.0035899	0.0114715	1.09218
GNB4	3;3;3;3;3;3;3;3;3;3;3;3;3;3;3;3;3;3;3;3;3;3;3;3;3;3;3;3;3;3;3;3;3;3	179396089;179400849;179401087;179405190;179405190;179410325;179413412;179413412;179413412;179413412;179413715;179413715;179413715;179413715;179414885;179414885;179414885;179416493;179416493;179416493;179416521;179419399;179419399;179419399;179420889;179420889;179420889;179426144;179426144;179426144;179437741;179450977;179451346;179451346	179401319;179401319;179401319;179405406;179405406;179410597;179413613;179413613;179413613;179413613;179413730;179413781;179413781;179413781;179415047;179415047;179415047;179416526;179416556;179416556;179416556;179419505;179419505;179419505;179420927;179420927;179420927;179426242;179426242;179426242;179437899;179451145;179451476;179451590	-;-;-;-;-;-;-;-;-;-;-;-;-;-;-;-;-;-;-;-;-;-;-;-;-;-;-;-;-;-;-;-;-;-	7035	0.263175	0.273885	0.192376	0.0914947	0.115181	0.0397662	0.000651879	0.00289596	1.47286
GNS	12;12;12;12;12;12;12;12;12;12;12;12;12;12;12;12;12;12;12;12;12;12;12;12;12;12;12;12;12;12;12;12;12;12;12;12;12;12;12;12;12;12;12;12;12;12;12;12;12;12;12;12;12;12;12;12;12;12;12;12;12;12;12;12;12;12;12;12;12;12;12;12;12;12;12;12;12;12;12;12;12;12;12;12;12;12;12;12	64713445;64713449;64716462;64716475;64716609;64720022;64720022;64720022;64720022;64720022;64720039;64720051;64721595;64721595;64721595;64721595;64721595;64721595;64721595;64722833;64723006;64723006;64723006;64723006;64723006;64723006;64723006;64728956;64728956;64728956;64728956;64728956;64728956;64728956;64737004;64737004;64737004;64737004;64737004;64737004;64739381;64739381;64739381;64739381;647…	64716819;64716819;64716819;64716819;64716819;64720182;64720182;64720182;64720182;64720182;64720182;64720182;64721705;64721705;64721705;64721705;64721705;64721705;64721705;64723113;64723113;64723113;64723113;64723113;64723113;64723113;64723113;64729218;64729154;64729057;64729057;64729057;64729057;64729057;64737107;64737107;64737107;64737107;64737107;64737107;64739499;64739499;64739499;64739499;647…	-;-;-;-;-;-;-;-;-;-;-;-;-;-;-;-;-;-;-;-;-;-;-;-;-;-;-;-;-;-;-;-;-;-;-;-;-;-;-;-;-;-;-;-;-;-;-;-;-;-;-;-;-;-;-;-;-;-;-;-;-;-;-;-;-;-;-;-;-;-;-;-;-;-;-;-;-;-;-;-;-;-;-;-;-;-;-;-	6284	24.4153	21.6204	25.5142	10.6048	9.9933	12.302	2.0084e-09	2.39701e-07	1.03845
GOLGA6A	15;15;15;15;15;15;15;15;15;15;15;15;15;15;15;15;15;15;15;15;15;15;15;15;15;15;15	74069857;74070646;74071124;74071124;74071367;74071554;74072218;74072251;74072742;74072742;74074148;74074493;74075403;74075683;74075899;74077018;74077076;74077221;74077221;74077403;74077715;74077715;74078609;74078609;74080616;74082426;74082426	74071037;74071037;74071310;74071277;74071470;74071656;74072309;74072309;74073013;74072817;74074216;74075001;74075490;74075790;74075985;74077124;74077124;74077453;74077302;74077453;74077753;74077753;74078689;74078689;74080735;74082550;74082550	-;-;-;-;-;-;-;-;-;-;-;-;-;-;-;-;-;-;-;-;-;-;-;-;-;-;-	3505	0.125106	0.394673	0.313725	0.122428	0.115591	0.119724	0.0182511	0.0430011	1.12936
GOLGA8O	15;15;15;15;15;15;15;15;15;15;15;15;15;15;15;15;15;15;15;15;15;15;15;15;15;15	32445106;32445367;32445618;32445798;32446474;32446997;32448318;32448642;32449275;32449558;32449772;32450913;32451118;32451165;32451291;32451291;32451601;32451601;32452491;32452491;32452753;32452753;32453703;32453703;32454734;32455489	32445281;32445522;32445715;32445898;32446565;32447072;32448386;32448898;32449362;32449665;32449858;32451022;32451202;32451202;32451338;32451338;32451639;32451639;32452571;32452571;32452812;32452812;32453822;32453822;32454902;32455634	-;-;-;-;-;-;-;-;-;-;-;-;-;-;-;-;-;-;-;-;-;-;-;-;-;-	2166	2.22691	2.03001	2.65549	0.594335	1.00539	1.29158	7.85394e-05	0.000548443	1.18902
GOLGA8Q	15;15;15;15;15;15;15;15;15;15;15;15;15;15;15;15;15;15;15;15;15;15	30552078;30553792;30554801;30555042;30555974;30556275;30556411;30556591;30557751;30557944;30558247;30558247;30558711;30558711;30559223;30559223;30560536;30561043;30561709;30561892;30562085;30562326	30552125;30553911;30554860;30555122;30556012;30556322;30556495;30556700;30557837;30558051;30558334;30558334;30558967;30558967;30559529;30559291;30560611;30561134;30561809;30561989;30562240;30562501	+;+;+;+;+;+;+;+;+;+;+;+;+;+;+;+;+;+;+;+;+;+	2137	2.62192	3.51404	4.33415	1.38552	1.01903	1.37456	2.95439e-06	4.4265e-05	1.3842
GOLGA8R	15;15;15;15;15;15;15;15;15;15;15;15;15;15;15;15;15;15;15;15	30403740;30404001;30404252;30404432;30405107;30405630;30406951;30407275;30407908;30408188;30408402;30409541;30409559;30409746;30409919;30410229;30411119;30411381;30412329;30414115	30403915;30404156;30404349;30404532;30405198;30405705;30407019;30407531;30407992;30408295;30408488;30409650;30412620;30409830;30409966;30410267;30411199;30411440;30412448;30414162	-;-;-;-;-;-;-;-;-;-;-;-;-;-;-;-;-;-;-;-	4433	1.39583	1.67171	2.11797	0.542075	0.456968	0.578485	1.33746e-07	4.6802e-06	1.63285
GOLM1	9;9;9;9;9;9;9;9;9;9;9;9;9;9;9;9;9;9;9;9;9;9;9;9;9;9;9;9;9;9;9;9;9;9;9;9;9;9;9;9;9;9;9;9;9;9	86026146;86026147;86033282;86033282;86035368;86035368;86035395;86035588;86036348;86036348;86036348;86036348;86040739;86040739;86040739;86040741;86046470;86046470;86046470;86046470;86046470;86052537;86052537;86052537;86052537;86052537;86077412;86077412;86077412;86077412;86077412;86077412;86077481;86077885;86079192;86079192;86079192;86079192;86079192;86079301;86079682;86084920;86099411;86100025;861…	86027893;86027893;86033395;86033395;86035625;86035625;86035625;86035625;86036507;86036813;86036507;86036507;86040868;86040868;86040868;86040868;86046572;86046572;86046572;86046572;86046572;86052591;86052591;86052591;86052591;86052591;86077539;86077591;86077591;86077591;86077591;86077591;86077591;86078012;86079341;86079341;86079341;86079341;86079341;86079341;86080165;86085039;86099558;86100149;861…	-;-;-;-;-;-;-;-;-;-;-;-;-;-;-;-;-;-;-;-;-;-;-;-;-;-;-;-;-;-;-;-;-;-;-;-;-;-;-;-;-;-;-;-;-;-	4233	31.3419	29.2249	30.8727	64.9393	68.6492	75.3636	2.03415e-11	7.91077e-09	-1.27457
GPM6B	X;X;X;X;X;X;X;X;X;X;X;X;X;X;X;X;X;X;X;X;X;X;X;X;X;X;X;X;X;X;X;X;X;X;X;X;X;X;X;X;X;X;X;X;X;X;X;X;X;X;X;X;X;X;X;X;X;X;X;X;X;X;X;X;X;X;X;X	13771031;13771456;13772699;13772854;13773954;13773954;13774337;13776167;13776238;13776238;13776238;13776238;13776238;13776238;13776238;13777352;13777352;13777352;13777352;13777352;13777352;13777352;13777352;13779818;13779818;13779818;13779818;13779818;13779818;13779818;13779818;13779853;13779908;13780915;13783365;13783365;13783365;13783365;13783365;13783365;13783365;13783365;13783365;13783449;137…	13773030;13774624;13773030;13773030;13774624;13774624;13774624;13776303;13776303;13776303;13776303;13776303;13776303;13776303;13776303;13777425;13777425;13777425;13777425;13777425;13777425;13777425;13777425;13779989;13779989;13779989;13779989;13779989;13779989;13779989;13779989;13779989;13779989;13781005;13783521;13783521;13783521;13783521;13783521;13783521;13783521;13783521;13783521;13783521;137…	-;-;-;-;-;-;-;-;-;-;-;-;-;-;-;-;-;-;-;-;-;-;-;-;-;-;-;-;-;-;-;-;-;-;-;-;-;-;-;-;-;-;-;-;-;-;-;-;-;-;-;-;-;-;-;-;-;-;-;-;-;-;-;-;-;-;-;-	5675	0.197464	0.174113	0.394979	0.0453685	0.107088	0.0492961	0.00055459	0.002538	1.8787
GPNMB	7;7;7;7;7;7;7;7;7;7;7;7;7;7;7;7;7;7;7;7;7;7;7;7;7;7;7;7;7;7;7;7;7;7;7;7;7;7;7;7;7;7;7;7;7;7;7;7;7;7;7;7;7;7;7;7;7;7;7;7;7;7;7;7	23235967;23236008;23236668;23236668;23246563;23246697;23246709;23246766;23246768;23246774;23247009;23247741;23250713;23250762;23250762;23253307;23253307;23253307;23253307;23253307;23253307;23253307;23253307;23254169;23254169;23254169;23254169;23254169;23254169;23254169;23256892;23256892;23256892;23256892;23256892;23256892;23259980;23259980;23259980;23260456;23260456;23266140;23266481;23266517;232…	23236123;23236123;23236823;23236758;23246927;23246927;23246927;23246927;23246927;23246927;23247367;23247993;23250862;23250862;23250862;23253459;23253459;23253367;23253459;23253459;23253459;23253459;23253459;23254312;23254312;23254312;23254312;23254312;23254312;23254312;23256910;23258048;23257065;23257065;23257043;23257065;23260138;23260138;23260053;23260773;23260773;23266615;23266615;23266615;232…	+;+;+;+;+;+;+;+;+;+;+;+;+;+;+;+;+;+;+;+;+;+;+;+;+;+;+;+;+;+;+;+;+;+;+;+;+;+;+;+;+;+;+;+;+;+;+;+;+;+;+;+;+;+;+;+;+;+;+;+;+;+;+;+	5956	24.9336	22.6369	24.7464	3.94095	4.57458	4.39173	5.75103e-15	4.49788e-11	2.404
GPR132	14;14;14;14;14;14;14;14;14;14;14;14;14;14;14;14;14;14;14	105049389;105049397;105049400;105050360;105051607;105053933;105055387;105055387;105055387;105055391;105057167;105057167;105057167;105057167;105057938;105065379;105065379;105065379;105065379	105052102;105052102;105052102;105052102;105052102;105054165;105055791;105056166;105056166;105056166;105057482;105057280;105057280;105057280;105058027;105065430;105065430;105065445;105065430	-;-;-;-;-;-;-;-;-;-;-;-;-;-;-;-;-;-;-	4200	0.24361	0.23526	0.563901	0.13282	0.0361739	0.188724	0.00719143	0.0202244	1.45085
GPR155	2;2;2;2;2;2;2;2;2;2;2;2;2;2;2;2;2;2;2;2;2;2;2;2;2;2;2;2;2;2;2;2;2;2;2;2;2;2;2;2;2;2;2;2;2;2;2;2;2;2;2;2;2;2;2;2;2;2;2;2;2;2;2;2;2;2;2;2;2;2;2;2;2	174431571;174432238;174434152;174435144;174436306;174439898;174439898;174439898;174439898;174439898;174442119;174442119;174442119;174442119;174442119;174445081;174445081;174445081;174445081;174445081;174445260;174446611;174446611;174446611;174446611;174453737;174453737;174453737;174453737;174459878;174459878;174459878;174459878;174461402;174461402;174461402;174461402;174461588;174461588;174461588…	174436416;174436416;174436416;174436416;174436416;174440035;174440035;174440035;174440035;174440035;174442183;174442183;174442183;174442183;174442183;174445176;174445176;174445176;174445176;174445176;174445422;174446747;174446747;174446747;174446747;174453841;174453841;174453841;174453841;174460088;174460088;174460088;174460088;174461492;174461492;174461492;174461492;174461672;174461672;174461672…	-;-;-;-;-;-;-;-;-;-;-;-;-;-;-;-;-;-;-;-;-;-;-;-;-;-;-;-;-;-;-;-;-;-;-;-;-;-;-;-;-;-;-;-;-;-;-;-;-;-;-;-;-;-;-;-;-;-;-;-;-;-;-;-;-;-;-;-;-;-;-;-;-	7769	0.163055	0.184417	0.157869	0.0497103	0.039112	0.0480122	7.71286e-05	0.00054125	1.77519
GPR158	10;10;10;10;10;10;10;10;10;10;10;10;10;10;10;10;10	25175062;25221052;25395911;25412250;25466190;25466651;25466651;25475431;25550976;25572649;25589007;25594213;25594292;25596643;25596643;25597772;25597772	25176322;25221157;25396013;25412473;25466358;25466719;25466719;25475949;25551085;25572887;25589145;25594397;25594397;25596789;25596789;25602226;25602226	+;+;+;+;+;+;+;+;+;+;+;+;+;+;+;+;+	7726	1.12251	1.00395	0.979857	0.444328	0.380187	0.47676	4.62598e-07	1.14484e-05	1.16663
GPRIN3	4;4;4	89236386;89244935;89307615	89250233;89251194;89308010	-;-;-	15205	0.0352478	0.0259939	0.0500669	0.0677319	0.0699449	0.0797286	0.00706169	0.0199528	-1.02067
GPX2	14;14;14;14;14;14;14;14;14;14;14;14;14	64939152;64939153;64939158;64939417;64939508;64939993;64941317;64942505;64942505;64942505;64942505;64942610;64942667	64939838;64939838;64939838;64939838;64939838;64940198;64941521;64942746;64942813;64942606;64942745;64942905;64942720	-;-;-;-;-;-;-;-;-;-;-;-;-	1499	1.1051	1.41721	1.10034	2.77676	2.93928	2.27064	1.36381e-05	0.000143945	-1.22538
GRAMD1C	3;3;3;3;3;3;3;3;3;3;3;3;3;3;3;3;3;3;3;3;3;3;3;3;3;3;3;3;3;3;3;3;3;3;3;3;3;3;3;3;3;3;3;3;3;3;3;3;3;3;3;3;3;3;3;3;3;3;3;3;3;3;3;3;3;3;3;3;3;3;3;3;3;3;3;3;3;3;3;3;3;3;3;3;3;3;3;3;3;3;3;3;3;3;3;3;3;3;3;3;3;3;3;3;3;3;3;3;3;3;3;3;3;3;3;3;3;3	113828182;113838418;113838818;113838874;113838881;113838900;113838905;113844503;113844503;113844503;113844503;113844503;113844503;113844503;113844823;113869507;113869507;113869507;113869507;113869507;113869507;113869507;113875484;113875484;113875484;113875484;113875484;113876165;113876165;113876165;113882752;113882752;113882752;113882778;113890625;113890665;113897470;113897492;113901031;113901031…	113828279;113838936;113838936;113838936;113838936;113838936;113838936;113844649;113844649;113844649;113844649;113844649;113844649;113844649;113844965;113869591;113869591;113869591;113869591;113869591;113869591;113869591;113875587;113875587;113875867;113875587;113875587;113876260;113876260;113876260;113882832;113882832;113882832;113882832;113890759;113891024;113897813;113897813;113901146;113901146…	+;+;+;+;+;+;+;+;+;+;+;+;+;+;+;+;+;+;+;+;+;+;+;+;+;+;+;+;+;+;+;+;+;+;+;+;+;+;+;+;+;+;+;+;+;+;+;+;+;+;+;+;+;+;+;+;+;+;+;+;+;+;+;+;+;+;+;+;+;+;+;+;+;+;+;+;+;+;+;+;+;+;+;+;+;+;+;+;+;+;+;+;+;+;+;+;+;+;+;+;+;+;+;+;+;+;+;+;+;+;+;+;+;+;+;+;+;+	7814	0.218233	0.271871	0.200259	0.0878649	0.0453678	0.101438	0.000311303	0.00160972	1.44485
GSTM4	1;1;1;1;1;1;1;1;1;1;1;1;1;1;1;1;1;1;1;1;1;1;1;1;1;1;1;1;1;1;1;1;1;1;1;1;1;1;1;1;1;1;1;1;1;1;1;1;1;1;1;1;1;1;1;1;1;1;1;1;1;1;1;1;1;1;1	109656081;109656117;109656118;109656121;109656122;109656252;109656336;109656347;109656390;109656712;109656712;109656712;109656712;109656712;109656712;109656712;109656712;109656712;109656721;109657215;109657215;109657215;109657215;109657215;109657215;109657215;109657215;109657215;109657350;109657533;109657590;109657590;109657590;109657772;109657772;109657772;109657772;109657772;109657772;109657772…	109656425;109656425;109656425;109656425;109656425;109656425;109656425;109656425;109656425;109656787;109656787;109657671;109656787;109656787;109656787;109656787;109656787;109656787;109656787;109657279;109657279;109657279;109657279;109657279;109657279;109657634;109657279;109657279;109657671;109657671;109657671;109657671;109657671;109657872;109657872;109657872;109657872;109657872;109657872;109657971…	+;+;+;+;+;+;+;+;+;+;+;+;+;+;+;+;+;+;+;+;+;+;+;+;+;+;+;+;+;+;+;+;+;+;+;+;+;+;+;+;+;+;+;+;+;+;+;+;+;+;+;+;+;+;+;+;+;+;+;+;+;+;+;+;+;+;+	5460	2.54318	2.46118	2.85049	7.04181	6.89159	5.80689	3.78892e-10	6.89143e-08	-1.41183
GTF2IRD2P1	7;7;7;7;7;7;7;7;7;7;7;7;7;7;7;7;7;7;7;7;7;7;7;7;7;7;7;7;7;7;7;7;7;7;7;7;7	73242751;73242869;73243271;73248577;73248577;73248577;73249890;73249890;73249890;73251373;73251373;73251373;73253528;73253528;73253528;73255699;73255699;73255699;73257483;73257483;73257483;73259321;73259321;73259321;73266112;73266112;73266112;73266527;73266527;73266527;73268979;73268979;73269176;73269176;73271495;73271495;73279980	73244871;73244871;73244871;73248605;73248605;73248605;73250073;73250073;73250073;73251456;73251456;73251456;73253605;73253605;73253605;73255764;73255764;73255764;73257539;73257539;73257539;73259398;73259398;73259398;73266155;73266155;73266155;73266581;73266581;73266840;73269007;73269007;73269359;73269359;73271614;73271614;73280119	-;-;-;-;-;-;-;-;-;-;-;-;-;-;-;-;-;-;-;-;-;-;-;-;-;-;-;-;-;-;-;-;-;-;-;-;-	3528	1.45006	1.06427	1.34262	0.510845	0.559834	0.726877	6.75503e-05	0.000489857	1.02074
GTPBP6	X;X;X;X;X;X;X;X;X;X;X;X;X;X	304529;304750;307360;307360;307732;307732;311419;311419;312766;314150;314890;315229;316914;318439	305197;305197;307512;307512;307880;307880;312463;311627;312924;314217;315020;315299;317051;318819	-;-;-;-;-;-;-;-;-;-;-;-;-;-	2964	11.26	10.7177	11.3151	30.9816	26.8766	12.4745	0.0283636	0.061543	-1.16754
GTSE1-AS1	22;22	46295143;46295695	46296660;46296000	-;-	1518	3.97993	3.51495	3.42687	0.819776	1.30112	1.53577	1.55423e-06	2.69826e-05	1.50302
GUCY1B2	13;13;13;13;13;13;13;13;13;13;13;13;13;13;13;13;13;13;13;13;13;13;13;13;13;13;13;13;13;13;13;13;13;13;13;13;13;13;13;13;13;13;13;13;13;13;13;13;13;13;13;13;13;13;13;13;13;13;13;13	50994511;50994693;51004253;51004253;51004253;51006700;51006700;51006990;51006990;51006991;51007794;51010073;51010073;51015416;51016108;51016181;51016181;51016916;51016916;51016916;51016916;51020398;51020398;51020398;51020398;51024100;51024100;51024100;51024100;51025334;51025334;51025334;51025334;51026702;51026702;51026702;51026702;51028208;51028208;51029594;51029594;51029594;51029594;51034003;510…	50994811;50994811;51004354;51004354;51004576;51006909;51006909;51007141;51007141;51007141;51007860;51010227;51010227;51016327;51016327;51016327;51016327;51017064;51017064;51017064;51017064;51020718;51020718;51020718;51020718;51024316;51024316;51024316;51024316;51025437;51025437;51025437;51025437;51026813;51026813;51026813;51026813;51028404;51028404;51029693;51029693;51029693;51029693;51034159;510…	-;-;-;-;-;-;-;-;-;-;-;-;-;-;-;-;-;-;-;-;-;-;-;-;-;-;-;-;-;-;-;-;-;-;-;-;-;-;-;-;-;-;-;-;-;-;-;-;-;-;-;-;-;-;-;-;-;-;-;-	4060	0.924038	1.07084	1.05211	0.391061	0.411634	0.505305	1.50075e-05	0.000154744	1.13743
H19	11;11;11;11;11;11;11;11;11;11;11;11;11;11;11;11;11;11;11;11;11;11;11;11;11;11;11;11;11;11;11;11;11;11;11;11;11;11;11;11;11;11;11;11;11;11;11;11;11;11;11;11;11;11;11;11;11;11;11;11;11;11	1995163;1995176;1995176;1995176;1995176;1995210;1995216;1995234;1995237;1995237;1995439;1995683;1995688;1995876;1995876;1995876;1995876;1995876;1995876;1995876;1995876;1995876;1995876;1995876;1995876;1996079;1996079;1996079;1996079;1996079;1996079;1996079;1996079;1996079;1996079;1996079;1996287;1996287;1996287;1996287;1996287;1996287;1996287;1996287;1996287;1996287;1996287;1996514;1996518;1996518…	1995794;1995788;1995794;1995998;1995794;1995794;1995794;1995794;1995794;1995794;1995794;1995794;1995794;1995998;1996191;1995998;1995998;1995998;1995998;1996031;1995998;1995998;1995941;1995998;1995998;1996191;1996191;1996191;1996191;1996191;1996191;1996191;1996191;1996191;1996191;1996191;1996467;1996421;1996421;1996421;1996421;1996421;1996421;1996417;1996421;1996421;1996421;1997025;1996571;1997275…	-;-;-;-;-;-;-;-;-;-;-;-;-;-;-;-;-;-;-;-;-;-;-;-;-;-;-;-;-;-;-;-;-;-;-;-;-;-;-;-;-;-;-;-;-;-;-;-;-;-;-;-;-;-;-;-;-;-;-;-;-;-	2825	2.77672	2.30846	2.72469	14.2784	13.7858	16.0426	3.73078e-14	1.94523e-10	-2.57763
H19_1	11;KI270721.1	1996540;51722	1996610;51792	+;+	142	1.37245	2.43544	1.48918	16.9227	12.4825	19.3727	7.49209e-08	3.05186e-06	-3.27152
H19_2	11;KI270721.1	1997484;52666	1997552;52734	+;+	138	16.9468	16.8262	13.7911	78.9811	81.4699	100.009	2.49688e-11	9.08284e-09	-2.53824
H19_3	11;KI270721.1	83386988;52895	83387102;53010	+;+	231	2.53101	3.84971	3.6617	13.0033	12.9349	17.9641	1.90986e-07	5.99881e-06	-2.19712
H2AFZ	4;4;4;4;4;4;4;4;4;4;4;4;4;4;4;4;4;4;4;4;4;4	99948086;99948088;99948088;99948120;99948172;99948778;99948811;99948811;99948811;99949273;99949273;99949273;99949273;99949273;99949663;99949663;99949663;99949663;99950168;99950168;99950168;99950248	99949740;99948940;99948523;99948523;99948523;99948940;99948940;99948940;99948940;99949386;99949379;99949386;99950299;99949386;99949740;99949740;99949740;99950268;99950254;99950388;99950355;99950299	-;-;-;-;-;-;-;-;-;-;-;-;-;-;-;-;-;-;-;-;-;-	2303	30.676	32.35	28.1889	68.2328	70.0388	61.8709	1.75453e-10	3.7595e-08	-1.21747
HCAR1	12	122726076	122730843	-	4768	1.05251	0.735681	1.02006	0.458989	0.27616	0.342262	2.14018e-05	0.000202766	1.28504
HDGF	1;1;1;1;1;1;1;1;1;1;1;1;1;1;1;1;1;1;1;1;1;1;1;1;1;1;1;1;1;1;1;1;1;1;1;1;1;1;1;1;1;1;1;1;1;1;1;1;1;1;1;1;1;1;1;1;1	156742107;156742110;156742110;156742526;156743156;156743171;156743307;156743345;156743652;156743652;156743652;156743652;156743652;156743652;156743709;156743803;156743841;156744163;156744163;156744163;156744163;156744163;156744163;156744163;156744163;156744163;156744163;156744501;156744501;156745008;156745008;156745008;156745008;156745008;156745008;156745008;156745008;156745008;156745297;156745297…	156743455;156743455;156743012;156743455;156743455;156743455;156743878;156743455;156743878;156743878;156743878;156743878;156743878;156743878;156743878;156743878;156743878;156744348;156744348;156744348;156744276;156744348;156744348;156744348;156744348;156744348;156744348;156744570;156744570;156745373;156745146;156745146;156745146;156745146;156745146;156745146;156745146;156745146;156745373;156745373…	-;-;-;-;-;-;-;-;-;-;-;-;-;-;-;-;-;-;-;-;-;-;-;-;-;-;-;-;-;-;-;-;-;-;-;-;-;-;-;-;-;-;-;-;-;-;-;-;-;-;-;-;-;-;-;-;-	3745	177.52	171.485	166.155	395.354	377.223	394.919	3.02756e-11	1.0295e-08	-1.26299
HERC2P3	15;15;15;15;15;15;15;15;15;15;15;15;15;15;15;15;15;15;15;15;15;15;15;15;15;15;15;15;15;15;15;15;15;15;15;15;15;15;15;15;15;15;15;15;15;15;15;15;15;15;15;15;15;15;15;15;15;15;15;15;15;15;15;15;15;15;15;15;15;15;15;15;15;15;15;15;15;15;15;15;15;15;15;15;15;15;15;15;15;15;15;15;15;15;15;15;15;15;15;15;15;15;15;15;15;15;15;15;15;15;15;15;15;15;15;15;15;15;15;15;15;15;15;15;15;15;15;15;15;15;15;15;15;…	20379495;20383115;20383291;20383304;20408396;20431093;20431093;20431093;20431093;20431093;20435849;20435849;20435849;20435849;20435849;20437294;20437294;20437294;20437294;20437294;20438592;20438592;20438592;20438592;20438592;20438697;20438927;20438927;20438927;20438927;20438927;20438927;20439270;20439508;20439508;20439508;20439508;20439508;20440474;20440474;20440474;20440474;20440474;20440474;204…	20383092;20383456;20383456;20383456;20408729;20431235;20431235;20431235;20431235;20431235;20435992;20435992;20435992;20435992;20435992;20437432;20437432;20437432;20437432;20437432;20438822;20438822;20438822;20438822;20438822;20438822;20439655;20439123;20439123;20439123;20439123;20439123;20439655;20439655;20439655;20439655;20439655;20439655;20440642;20440670;20440642;20440642;20440642;20440642;204…	-;-;-;-;-;-;-;-;-;-;-;-;-;-;-;-;-;-;-;-;-;-;-;-;-;-;-;-;-;-;-;-;-;-;-;-;-;-;-;-;-;-;-;-;-;-;-;-;-;-;-;-;-;-;-;-;-;-;-;-;-;-;-;-;-;-;-;-;-;-;-;-;-;-;-;-;-;-;-;-;-;-;-;-;-;-;-;-;-;-;-;-;-;-;-;-;-;-;-;-;-;-;-;-;-;-;-;-;-;-;-;-;-;-;-;-;-;-;-;-;-;-;-;-;-;-;-;-;-;-;-;-;-;-;-;-;-;-;-;-;-;-;-;-;-;-;-;-;-;-;-;-;-;-;-;-	9413	0.243274	0.278173	0.426835	0.159554	0.156025	0.11888	0.000782629	0.00335772	1.0496
HES2	1;1;1;1;1;1;1;1;1;1;1;1;1;1;1;1;1;1;1	6412418;6413000;6413050;6415232;6416516;6418414;6418849;6419241;6419607;6419607;6419607;6419607;6419607;6419776;6419776;6419776;6419776;6419776;6424478	6413282;6413282;6413282;6419153;6416631;6419153;6419340;6419340;6419702;6419702;6419702;6419702;6419702;6419907;6419917;6419919;6419843;6419903;6424670	-;-;-;-;-;-;-;-;-;-;-;-;-;-;-;-;-;-;-	5407	0.486589	0.502543	0.438022	0.158724	0.168593	0.206958	3.46304e-05	0.000293416	1.3289
HEYL	1;1;1;1;1	39624153;39630227;39631496;39632649;39639546	39627180;39630308;39631579;39632715;39639945	-;-;-;-;-	3661	0.372635	0.39135	0.335014	0.128932	0.193665	0.0891508	0.00116886	0.00465845	1.3338
HHEX	10;10;10;10;10;10;10;10;10;10;10;10;10	92689951;92689955;92691570;92691820;92692032;92692368;92692368;92692702;92692702;92692702;92694547;92694547;92694547	92690347;92690347;92692483;92692099;92692546;92692546;92692546;92692752;92692752;92692752;92694788;92695641;92695646	+;+;+;+;+;+;+;+;+;+;+;+;+	2525	0.636763	0.371757	0.586234	0.968684	0.862443	1.47726	0.000554054	0.00253749	-1.12699
HIST1H2AE	6	26216975	26217483	+	509	27.5677	31.7393	24.0129	15.1748	13.631	9.5267	1.44992e-05	0.000150895	1.03026
HIST1H2AI	6	27808199	27808701	+	503	24.8938	32.1179	30.2691	11.0903	9.76624	8.62069	1.3874e-08	9.07801e-07	1.4793
HIST1H2AM	6	27892757	27893149	-	393	27.0265	28.1594	24.9666	11.574	11.8555	11.2709	1.3105e-07	4.61685e-06	1.12286
HIST1H2BE	6;6;6;6;6	26172059;26173763;26181167;26183307;26183730	26172788;26173897;26181537;26184655;26184226	+;+;+;+;+	2585	0.678527	0.688033	0.621709	0.2324	0.274278	0.198408	0.000156246	0.000937478	1.40684
HIST1H2BG	6	26215159	26216692	-	1534	12.8634	11.8197	12.2687	5.84642	5.44731	5.50149	1.33101e-08	8.82189e-07	1.05256
HIST1H2BH	6	26251651	26253710	+	2060	4.06805	3.86123	4.74252	1.31233	2.11424	1.87862	2.69849e-06	4.13416e-05	1.18541
HIST1H3B	6	26031650	26032060	-	411	6.87561	6.85173	5.65959	1.46169	1.97152	2.94957	3.48975e-05	0.000295063	1.51823
HIST1H3E	6;6;6	26224199;26224902;26225155	26224305;26227473;26225616	+;+;+	2679	2.81893	2.48959	2.4943	0.97707	1.17204	1.46195	8.72106e-06	0.000101686	1.03107
HIST1H3H	6	27810064	27811300	+	1237	11.6192	10.6238	10.4962	2.9833	3.11148	3.46773	3.64985e-10	6.79386e-08	1.69182
HIST1H3J	6;6;6	27890382;27890635;27892761	27890792;27890810;27893106	-;-;-	775	13.8308	14.2795	12.8788	5.92449	5.88118	5.71543	9.14397e-08	3.5316e-06	1.1407
HIST1H4E	6	26204552	26206038	+	1487	0.917429	0.99673	0.995455	0.317432	0.783322	0.282201	0.0118802	0.0301477	1.01406
HIST2H2AC	1	149886975	149887364	+	390	2.24871	2.53357	0.975983	3.96102	5.06435	2.51062	0.00899925	0.0242033	-1.10085
HIST2H2BE	1	149884459	149886652	-	2194	25.116	21.8875	23.1125	9.46624	10.7565	11.9646	7.23826e-09	5.71823e-07	1.04184
HIST2H2BF	1;1;1;1;1;1;1;1;1	149782689;149782877;149803602;149805260;149810406;149811683;149811947;149811947;149811947	149783260;149783260;149803961;149805555;149812359;149811757;149812057;149812338;149812373	-;-;-;-;-;-;-;-;-	3196	1.11286	1.32941	1.21743	0.389368	0.491223	0.598142	1.80413e-05	0.000177633	1.22775
HIST3H2BB	1	228458107	228460470	+	2364	0.4122	0.501569	0.536708	0.145215	0.214228	0.216956	0.00190087	0.00686367	1.25447
HIST4H4	12;12;12;12;12;12;12;12;12;12;12	14767999;14768158;14768925;14768939;14768996;14769295;14769900;14769900;14770555;14770679;14770679	14769463;14768201;14769463;14769009;14769457;14769622;14770276;14770170;14771131;14770793;14771131	-;-;-;-;-;-;-;-;-;-;-	2578	0.22679	0.402442	0.541371	0.0832254	0.157156	0.217033	0.00850052	0.0231626	1.29459
HIVEP2	6;6;6;6;6;6;6;6;6;6;6;6;6;6;6;6;6;6;6;6;6;6;6;6;6;6;6;6;6;6	142751467;142751468;142751469;142759772;142759772;142759772;142761464;142761464;142761464;142764799;142764799;142764799;142768382;142768382;142768382;142769552;142769552;142769552;142776147;142776147;142776147;142779543;142783521;142783521;142783521;142836935;142836935;142836935;142836935;142945099	142753931;142753931;142753931;142760667;142760667;142760667;142761565;142761565;142761565;142764974;142764974;142764974;142768536;142768536;142768536;142775125;142775125;142775125;142776191;142776191;142776191;142779592;142783615;142783615;142783615;142837047;142837047;142837047;142837047;142945201	-;-;-;-;-;-;-;-;-;-;-;-;-;-;-;-;-;-;-;-;-;-;-;-;-;-;-;-;-;-	9774	2.45754	2.36054	2.92941	1.05368	1.11401	1.33094	4.8684e-08	2.26493e-06	1.06685
HMGA1	6;6;6;6;6;6;6;6;6;6;6;6;6;6;6;6;6;6;6;6;6;6;6;6;6;6;6;6;6;6;6;6	34236873;34236873;34236873;34236873;34237204;34237204;34237204;34238791;34240737;34240737;34240737;34240737;34240737;34240737;34242712;34242712;34242712;34242712;34242712;34242712;34243468;34243468;34243468;34243468;34243468;34243468;34244831;34244831;34244831;34244831;34244831;34244831	34236963;34236963;34236963;34237317;34237317;34237317;34237317;34238957;34240882;34240882;34240915;34240882;34240882;34240915;34242795;34242795;34242795;34242795;34242795;34242795;34243518;34243518;34243518;34243518;34243518;34243518;34246230;34245151;34246231;34246231;34246230;34246231	+;+;+;+;+;+;+;+;+;+;+;+;+;+;+;+;+;+;+;+;+;+;+;+;+;+;+;+;+;+;+;+	2327	27.0096	27.0908	25.8081	52.4816	51.9057	52.3965	9.93429e-11	2.428e-08	-1.05539
HNRNPAB	5;5;5;5;5;5;5;5;5;5;5;5;5;5;5;5;5;5;5;5;5;5;5;5;5;5;5;5;5;5;5;5;5;5;5;5;5;5;5;5;5;5;5;5;5;5;5;5;5;5;5;5	178204507;178204533;178204539;178204541;178204544;178204548;178204571;178204815;178204815;178204815;178204815;178204815;178205568;178205842;178205842;178205842;178205842;178205842;178205842;178205842;178206732;178206732;178206732;178206732;178206732;178206732;178206732;178206732;178207094;178207094;178207094;178207094;178207094;178207094;178207094;178209330;178209330;178209330;178209330;178209330…	178204740;178204740;178204740;178204740;178204740;178205046;178205046;178205046;178205046;178205046;178205046;178205046;178206010;178206010;178206010;178206010;178206010;178206010;178206010;178206010;178206866;178206890;178206890;178206890;178206890;178206890;178206890;178206890;178207225;178207225;178207225;178207225;178207225;178207225;178207225;178209447;178209447;178209432;178209441;178209447…	+;+;+;+;+;+;+;+;+;+;+;+;+;+;+;+;+;+;+;+;+;+;+;+;+;+;+;+;+;+;+;+;+;+;+;+;+;+;+;+;+;+;+;+;+;+;+;+;+;+;+;+	2144	108.625	103.533	102.398	295.834	300.979	329.186	6.58834e-13	1.03055e-09	-1.63994
HPDL	1	45326905	45328533	+	1629	1.16646	0.909845	1.09042	2.00199	2.23839	2.80499	1.45648e-05	0.000151478	-1.22924
HPGD	4;4;4;4;4;4;4;4;4;4;4;4;4;4;4;4;4;4;4;4;4;4;4;4;4;4;4;4;4;4;4;4;4;4;4;4;4;4;4;4;4;4;4;4;4;4;4;4;4;4;4;4;4;4;4;4;4;4;4;4;4;4;4;4;4;4;4;4;4;4;4;4;4;4;4	174490177;174490177;174490177;174491104;174491458;174491571;174491755;174491785;174491794;174491870;174493151;174493151;174493151;174493151;174493151;174493151;174493151;174493151;174493152;174493159;174495361;174495548;174495548;174495548;174495548;174495548;174495548;174495548;174495548;174495548;174495548;174506743;174508696;174508696;174508696;174508696;174508696;174508696;174508696;174508696…	174492094;174492094;174492094;174492094;174492094;174492094;174492094;174492094;174492094;174492094;174493461;174493314;174493314;174493314;174493314;174493314;174493314;174493314;174493314;174493314;174495624;174495624;174495624;174495829;174495624;174495624;174495624;174495624;174495624;174495624;174495624;174508183;174508792;174508792;174508792;174508792;174508792;174508792;174508792;174508792…	-;-;-;-;-;-;-;-;-;-;-;-;-;-;-;-;-;-;-;-;-;-;-;-;-;-;-;-;-;-;-;-;-;-;-;-;-;-;-;-;-;-;-;-;-;-;-;-;-;-;-;-;-;-;-;-;-;-;-;-;-;-;-;-;-;-;-;-;-;-;-;-;-;-;-	5529	0.264363	0.285937	0.344215	0.690736	0.714449	0.632472	6.6685e-06	8.23273e-05	-1.26087
HPSE	4;4;4;4;4;4;4;4;4;4;4;4;4;4;4;4;4;4;4;4;4;4;4;4;4;4;4;4;4;4;4;4;4;4;4;4;4;4;4;4;4;4;4;4;4;4;4;4;4;4;4;4;4;4;4;4;4;4;4;4;4;4;4;4;4;4;4;4;4;4;4;4;4;4;4;4;4;4;4;4;4;4	83292461;83292461;83295320;83295320;83295320;83295320;83295344;83300960;83300960;83300960;83300960;83300960;83300960;83300960;83302150;83302150;83302150;83302150;83302150;83302150;83302150;83306203;83306203;83306203;83306203;83306203;83308845;83308845;83308845;83308845;83308845;83308845;83309402;83309402;83309402;83309402;83309402;83309402;83309402;83310031;83310031;83310031;83310031;83310031;833…	83295503;83295503;83295503;83295503;83295503;83295503;83295503;83301106;83301106;83301106;83301106;83301106;83301106;83301106;83302268;83302268;83302268;83302268;83302268;83302268;83302268;83306317;83306317;83306317;83306317;83306317;83308951;83308951;83308951;83308951;83308951;83308951;83309495;83309495;83309495;83309495;83309495;83309495;83309495;83310078;83310078;83310078;83310078;83310078;833…	-;-;-;-;-;-;-;-;-;-;-;-;-;-;-;-;-;-;-;-;-;-;-;-;-;-;-;-;-;-;-;-;-;-;-;-;-;-;-;-;-;-;-;-;-;-;-;-;-;-;-;-;-;-;-;-;-;-;-;-;-;-;-;-;-;-;-;-;-;-;-;-;-;-;-;-;-;-;-;-;-;-	4721	0.0928825	0.146508	0.116459	0.199967	0.300364	0.266659	0.00263085	0.00893632	-1.17462
HS6ST3	13;13;13	96090839;96832488;96832490	96091569;96839560;96839562	+;+;+	7806	1.46678	1.5253	1.6904	0.654165	0.804482	0.752608	4.64993e-07	1.14723e-05	1.00448
HTR7P1	12;12	13000420;13001499	13004830;13002834	+;+	4411	0.309276	0.515214	0.709511	0.204292	0.218142	0.253689	0.0020961	0.00741959	1.10994
HTRA1	10;10;10;10;10;10;10;10;10;10;10;10;10;10;10	122461525;122488902;122489422;122506691;122506691;122507370;122507370;122508656;122508656;122510096;122510096;122511970;122511970;122514191;122514191	122462124;122489001;122489626;122506885;122506885;122507402;122507402;122508770;122508770;122510153;122510153;122512065;122512065;122514907;122514908	+;+;+;+;+;+;+;+;+;+;+;+;+;+;+	2120	1.67769	1.1419	1.4164	3.25881	2.84272	3.14505	1.31813e-06	2.39746e-05	-1.20943
ICAM3	19;19;19;19;19;19;19;19;19;19;19;19;19;19;19;19;19;19;19;19;19;19;19;19;19;19;19;19;19;19;19;19;19;19;19;19;19;19;19;19;19;19;19;19;19	10333776;10333776;10333776;10333778;10333779;10333975;10334160;10334160;10334160;10334160;10334160;10334229;10334528;10334528;10334528;10334528;10334528;10335066;10335066;10335066;10335141;10335146;10335671;10335671;10335671;10335889;10335967;10338682;10338682;10338682;10338682;10338682;10338682;10338682;10338724;10339018;10339062;10339539;10339539;10339539;10339539;10339539;10339539;10339539;103…	10334059;10334059;10334059;10334059;10334059;10334059;10334408;10334408;10335976;10334408;10334408;10334408;10334782;10334723;10334782;10334782;10334782;10335353;10335353;10335976;10335353;10335976;10335976;10335773;10335976;10335976;10335976;10338863;10338863;10338948;10339245;10338948;10338948;10338948;10339208;10339245;10339245;10339641;10339635;10339624;10339624;10339619;10339823;10339661;103…	-;-;-;-;-;-;-;-;-;-;-;-;-;-;-;-;-;-;-;-;-;-;-;-;-;-;-;-;-;-;-;-;-;-;-;-;-;-;-;-;-;-;-;-;-	2950	2.41133	2.5121	2.09313	5.55661	5.09868	4.42551	7.17186e-08	2.94441e-06	-1.19185
ID1	20;20;20	31605283;31605283;31606053	31606515;31605813;31606515	+;+;+	1233	10.6295	10.3377	9.36405	28.2941	27.7245	25.7142	3.92437e-11	1.30606e-08	-1.51534
IFITM10	11;11;11;11;11;11;11;11;11;11;11	1732410;1732410;1735213;1747667;1747667;1747757;1747930;1749015;1749019;1750359;1750359	1735429;1735429;1735429;1748119;1748119;1749102;1748119;1749126;1749197;1750591;1750580	-;-;-;-;-;-;-;-;-;-;-	4784	10.0622	9.99658	9.83055	19.0337	17.5939	22.3091	1.33503e-09	1.81588e-07	-1.06116
IGDCC3	15;15;15;15;15;15;15;15;15;15;15;15;15;15;15;15;15;15;15;15;15;15;15;15;15;15;15;15;15;15;15;15;15;15;15;15;15	65327127;65329390;65329579;65329726;65329726;65330293;65330293;65330550;65330550;65331050;65331050;65331104;65331412;65331412;65331412;65331941;65331941;65331941;65333257;65333257;65333257;65334578;65334728;65334728;65334771;65335291;65335291;65335291;65335812;65335812;65335812;65355719;65356197;65373489;65375097;65375097;65377686	65329148;65329597;65329597;65329864;65329864;65330397;65330397;65330741;65330741;65331214;65331214;65331214;65331659;65331659;65331659;65332106;65332106;65332106;65333415;65333415;65333415;65334641;65334865;65334865;65334865;65335421;65335421;65335421;65335956;65335956;65335956;65355911;65356372;65374128;65375300;65375402;65378040	-;-;-;-;-;-;-;-;-;-;-;-;-;-;-;-;-;-;-;-;-;-;-;-;-;-;-;-;-;-;-;-;-;-;-;-;-	5552	1.53573	1.32588	1.7368	0.541025	0.802706	0.739027	6.17167e-06	7.76023e-05	1.07031
IL17RE	3;3;3;3;3;3;3;3;3;3;3;3;3;3;3;3;3;3;3;3;3;3;3;3;3;3;3;3;3;3;3;3;3;3;3;3;3;3;3;3;3;3;3;3;3;3;3;3;3;3;3;3;3;3;3;3;3;3;3;3;3;3;3;3;3;3;3;3;3;3;3;3;3;3;3;3;3;3;3;3;3;3;3;3;3;3;3;3;3;3;3;3;3;3;3;3;3;3;3;3;3;3;3;3;3;3	9902612;9902619;9902828;9902831;9902848;9902848;9902848;9902850;9902882;9902890;9902890;9903397;9903397;9903397;9903397;9903397;9904032;9904032;9904032;9904032;9904032;9906364;9906364;9906364;9906364;9906364;9906364;9906364;9906706;9906706;9906706;9906706;9906706;9906706;9906706;9906706;9906961;9906961;9906961;9906961;9906961;9906961;9906961;9906961;9908239;9908239;9908239;9908239;9908239;9908239…	9902692;9902692;9903064;9903064;9903064;9903064;9903064;9903064;9903064;9903380;9903064;9903412;9903412;9903412;9903412;9903412;9904151;9904151;9904151;9904151;9904151;9906461;9906461;9906461;9906461;9906461;9906461;9906461;9906865;9906865;9906865;9906865;9906865;9906865;9906865;9906865;9907074;9907100;9907100;9907100;9907100;9907100;9907100;9907100;9908307;9908307;9908307;9908307;9908307;9908307…	+;+;+;+;+;+;+;+;+;+;+;+;+;+;+;+;+;+;+;+;+;+;+;+;+;+;+;+;+;+;+;+;+;+;+;+;+;+;+;+;+;+;+;+;+;+;+;+;+;+;+;+;+;+;+;+;+;+;+;+;+;+;+;+;+;+;+;+;+;+;+;+;+;+;+;+;+;+;+;+;+;+;+;+;+;+;+;+;+;+;+;+;+;+;+;+;+;+;+;+;+;+;+;+;+;+	4676	0.312588	0.369795	0.361784	0.0917686	0.108305	0.0498566	2.64493e-05	0.000238318	1.97095
IRF6	1;1;1;1;1;1;1;1;1;1;1;1;1;1;1;1;1;1;1;1;1;1;1;1	209785623;209785691;209789667;209789667;209790495;209790495;209790726;209790738;209792269;209792269;209792269;209792269;209795290;209795290;209795290;209796348;209796348;209796348;209801240;209801240;209801972;209801972;209805947;209805947	209788644;209788644;209789785;209789785;209790887;209790887;209790887;209790887;209792714;209792427;209792427;209792427;209795418;209795418;209795418;209796552;209796552;209796552;209801416;209801416;209802166;209802043;209806044;209806175	-;-;-;-;-;-;-;-;-;-;-;-;-;-;-;-;-;-;-;-;-;-;-;-	4915	4.65907	4.55346	5.39521	1.89455	1.49406	2.07753	5.28762e-09	4.47076e-07	1.3329
IRX5	16;16;16;16;16;16;16;16;16;16;16;16;16;16;16	54930862;54931199;54931199;54931199;54932054;54932054;54932072;54932498;54932498;54932498;54933077;54933077;54933080;54933487;54933497	54931447;54931447;54931447;54931447;54932209;54932209;54932903;54932903;54932509;54932903;54934069;54934485;54934485;54933960;54933960	+;+;+;+;+;+;+;+;+;+;+;+;+;+;+	2845	10.5664	10.0025	10.6289	4.29864	3.72038	5.14605	7.54544e-09	5.90129e-07	1.16085
ITPKA	15;15;15;15;15;15;15;15;15;15;15;15;15;15;15;15;15;15;15;15;15;15	41493393;41493875;41494273;41501439;41501463;41501463;41501635;41501635;41501635;41501794;41501997;41501997;41501997;41501997;41502402;41502402;41502402;41502402;41502788;41502788;41502963;41502963	41493494;41494416;41494416;41501559;41501559;41501559;41501851;41501851;41501851;41501851;41502201;41502201;41502201;41502201;41502645;41502503;41502503;41502488;41502859;41502859;41503099;41503551	+;+;+;+;+;+;+;+;+;+;+;+;+;+;+;+;+;+;+;+;+;+	2092	0.442504	0.519551	0.545841	1.43584	1.23462	1.02523	3.24282e-05	0.000280087	-1.37188
JADE3	X;X;X;X;X;X;X;X;X;X;X;X;X;X;X;X;X;X;X;X;X;X;X;X;X;X;X;X;X;X;X;X;X	46912276;46912276;46912433;46912796;46984884;46984884;46984884;46984884;46985713;46985713;46985713;46985713;46998120;46998120;46998120;46998120;47024724;47024724;47024724;47024724;47027892;47027892;47027892;47033621;47033621;47038949;47038949;47054158;47054158;47056082;47056082;47058167;47058167	46912340;46912340;46912719;46912932;46984940;46984940;46984940;46984940;46985792;46985792;46985792;46985792;46998277;46998277;46998277;46998277;47024783;47024914;47024914;47024914;47028103;47028103;47027976;47033788;47033788;47039065;47039065;47054628;47054628;47056199;47056199;47061241;47061242	+;+;+;+;+;+;+;+;+;+;+;+;+;+;+;+;+;+;+;+;+;+;+;+;+;+;+;+;+;+;+;+;+	5137	8.24206	8.33829	7.93655	4.00959	3.36177	3.67597	2.34729e-09	2.604e-07	1.06485
KALRN	3;3;3;3;3;3;3;3;3;3;3;3;3;3;3;3;3;3;3;3;3;3;3;3;3;3;3;3;3;3;3;3;3;3;3;3;3;3;3;3;3;3;3;3;3;3;3;3;3;3;3;3;3;3;3;3;3;3;3;3;3;3;3;3;3;3;3;3;3;3;3;3;3;3;3;3;3;3;3;3;3;3;3;3;3;3;3;3;3;3;3;3;3;3;3;3;3;3;3;3;3;3;3;3;3;3;3;3;3;3;3;3;3;3;3;3;3;3;3;3;3;3;3;3;3;3;3;3;3;3;3;3;3;3;3;3;3;3;3;3;3;3;3;3;3;3;3;3;3;3;3;3;3;3;3;3;3;3;3;3;3;3;3;3;3;3;3;3;3;3;3;3;3;3;3;3;3;3;3;3;3;3;3;3;3;3;3;3;3;3;3;3;3;3;3;3;3;3;3;3…	124080023;124080041;124082253;124082253;124094103;124094661;124094681;124094681;124094711;124094711;124094753;124095788;124096593;124099361;124100328;124162210;124162210;124162210;124162709;124162709;124162709;124227990;124227990;124227990;124227990;124227990;124234829;124234829;124234829;124234829;124234829;124264498;124264498;124264498;124264498;124264498;124268591;124268743;124268743;124268743…	124080092;124080092;124082332;124082332;124094149;124094904;124094904;124094904;124094904;124094904;124094904;124096183;124096676;124099403;124100536;124162447;124162447;124162447;124164686;124163570;124164685;124228064;124228064;124228064;124228064;124228064;124234943;124234943;124234943;124234943;124234943;124264690;124264690;124264690;124264690;124264690;124269255;124269255;124269255;124269255…	+;+;+;+;+;+;+;+;+;+;+;+;+;+;+;+;+;+;+;+;+;+;+;+;+;+;+;+;+;+;+;+;+;+;+;+;+;+;+;+;+;+;+;+;+;+;+;+;+;+;+;+;+;+;+;+;+;+;+;+;+;+;+;+;+;+;+;+;+;+;+;+;+;+;+;+;+;+;+;+;+;+;+;+;+;+;+;+;+;+;+;+;+;+;+;+;+;+;+;+;+;+;+;+;+;+;+;+;+;+;+;+;+;+;+;+;+;+;+;+;+;+;+;+;+;+;+;+;+;+;+;+;+;+;+;+;+;+;+;+;+;+;+;+;+;+;+;+;+;+;+;+;+;+;+;+;+;+;+;+;+;+;+;+;+;+;+;+;+;+;+;+;+;+;+;+;+;+;+;+;+;+;+;+;+;+;+;+;+;+;+;+;+;+;+;+;+;+;+;+…	24490	0.911175	0.921923	0.998167	0.339924	0.33914	0.424564	2.12121e-09	2.43971e-07	1.27738
KCNC3	19;19;19;19;19;19;19;19;19;19;19;19;19;19	50311937;50311942;50315508;50316033;50316033;50320223;50320593;50320593;50320593;50322975;50322975;50328213;50328213;50333469	50314990;50314990;50316091;50316091;50316091;50320349;50320784;50320784;50320784;50324082;50324082;50329377;50329246;50333515	-;-;-;-;-;-;-;-;-;-;-;-;-;-	6277	1.54464	1.64498	2.01457	0.840856	0.500222	0.87651	9.23437e-06	0.000106444	1.14112
KCNF1	2	10911937	10914225	+	2289	0.36185	0.280585	0.147812	0.431172	0.730116	0.611086	0.00303936	0.0100418	-1.25162
KCNJ8	12;12;12;12;12	21764955;21773243;21773275;21774546;21775487	21766623;21773686;21773686;21774821;21775581	-;-;-;-;-	2484	2.37334	2.34692	2.5539	0.570074	0.366982	0.488032	3.04338e-09	3.11141e-07	2.25177
KCNQ1OT1	11	2608328	2699994	-	91667	0.0329537	0.0328764	0.0696672	0.0257465	0.0110494	0.0249236	0.00912304	0.0244563	1.04772
KDELR3	22;22;22;22;22;22;22;22;22;22;22;22;22;22	38468062;38468078;38474329;38474523;38474523;38474523;38479593;38479593;38479593;38481212;38481212;38481212;38482496;38482496	38468324;38468324;38474358;38474623;38474623;38474623;38479751;38479751;38479751;38481464;38481635;38481464;38482922;38483447	+;+;+;+;+;+;+;+;+;+;+;+;+;+	1929	0.782987	0.896403	1.05238	2.60269	2.28408	2.19956	7.83741e-07	1.64333e-05	-1.45118
KDM6B	17;17;17;17;17;17;17;17;17;17;17;17;17;17;17;17;17;17;17;17;17;17;17;17;17;17;17;17;17;17;17;17;17;17;17;17;17;17;17;17;17;17;17;17;17;17;17;17;17;17;17;17;17;17;17;17;17;17;17;17;17;17	7839904;7839904;7839962;7839991;7840284;7840284;7844207;7844901;7844901;7844901;7844901;7844915;7845314;7845314;7845314;7845314;7845550;7845550;7845550;7845872;7845872;7845872;7846078;7846078;7846078;7846400;7846400;7846400;7846579;7846579;7846579;7846819;7846819;7847105;7847105;7847105;7847546;7847546;7847546;7849821;7849821;7850072;7850072;7851021;7851021;7851330;7851330;7851478;7851478;7851648…	7840024;7840024;7840024;7840024;7840681;7840370;7844353;7844972;7845020;7845020;7845020;7845020;7845456;7845456;7845456;7845347;7845691;7845691;7845691;7845970;7845970;7845970;7846297;7846297;7846297;7846492;7846492;7846492;7846740;7846740;7846740;7847016;7847016;7847452;7847452;7847452;7847571;7849728;7849728;7849947;7849947;7850177;7850177;7851226;7851226;7851394;7851394;7851549;7851549;7851796…	+;+;+;+;+;+;+;+;+;+;+;+;+;+;+;+;+;+;+;+;+;+;+;+;+;+;+;+;+;+;+;+;+;+;+;+;+;+;+;+;+;+;+;+;+;+;+;+;+;+;+;+;+;+;+;+;+;+;+;+;+;+	7258	7.22976	6.93625	9.36404	3.32859	2.93757	3.6039	2.31888e-08	1.34516e-06	1.17037
KHNYN	14;14;14;14;14;14;14;14;14;14;14;14;14;14;14;14;14;14;14;14;14;14;14;14;14;14;14;14;14;14;14;14;14;14	24429286;24429935;24429938;24430224;24430714;24430714;24430714;24431463;24431463;24431463;24431463;24432722;24432722;24432722;24432794;24432936;24432936;24432936;24432936;24435457;24436068;24436072;24436072;24436072;24436388;24436388;24436388;24436388;24436388;24437036;24437036;24437036;24437036;24437036	24429407;24429991;24430119;24430931;24430931;24430931;24430931;24431665;24432610;24432610;24432610;24432852;24432852;24432852;24432852;24433032;24433032;24433032;24433032;24436179;24436179;24436179;24436179;24436179;24436489;24436489;24436489;24436489;24436489;24437425;24438408;24438408;24437617;24441834	+;+;+;+;+;+;+;+;+;+;+;+;+;+;+;+;+;+;+;+;+;+;+;+;+;+;+;+;+;+;+;+;+;+	8015	16.9235	15.108	17.2811	6.33894	6.57765	7.37637	9.09992e-11	2.41256e-08	1.19855
KIAA1161	9;9;9;9	34366670;34372068;34372617;34376793	34373006;34372331;34372832;34376853	-;-;-;-	6398	5.10218	4.57135	6.04841	2.09257	1.89972	2.76928	2.79637e-07	7.86706e-06	1.13573
KIAA1217	10;10;10;10;10;10;10;10;10;10;10;10;10;10;10;10;10;10;10;10;10;10;10;10;10;10;10;10;10;10;10;10;10;10;10;10;10;10;10;10;10;10;10;10;10;10;10;10;10;10;10;10;10;10;10;10;10;10;10;10;10;10;10;10;10;10;10;10;10;10;10;10;10;10;10;10;10;10;10;10;10;10;10;10;10;10;10;10;10;10;10;10;10;10;10;10;10;10;10;10;10;10;10;10;10;10;10;10;10;10;10;10;10;10;10;10;10;10;10;10;10;10;10;10;10;10;10;10;10;10;10;10;10;…	23694746;23694782;23877406;24007225;24042131;24208791;24208791;24208791;24208791;24209164;24209167;24219626;24219626;24219626;24219626;24219626;24219626;24219626;24219626;24239195;24367119;24380869;24380869;24380869;24380869;24380869;24380869;24380869;24380869;24432995;24432995;24432995;24432995;24432995;24432995;24432995;24438386;24438386;24438386;24438386;24438386;24438386;24438386;24449433;244…	23695234;23695234;23877495;24007374;24042495;24209263;24209263;24209263;24209263;24209263;24209263;24219909;24219909;24219909;24219909;24219909;24219909;24219909;24219909;24239337;24367168;24381067;24381005;24381067;24381067;24381067;24381067;24381067;24381067;24433193;24433193;24433193;24433193;24433193;24433193;24433193;24438479;24438479;24438479;24438479;24438479;24438479;24438479;24449764;244…	+;+;+;+;+;+;+;+;+;+;+;+;+;+;+;+;+;+;+;+;+;+;+;+;+;+;+;+;+;+;+;+;+;+;+;+;+;+;+;+;+;+;+;+;+;+;+;+;+;+;+;+;+;+;+;+;+;+;+;+;+;+;+;+;+;+;+;+;+;+;+;+;+;+;+;+;+;+;+;+;+;+;+;+;+;+;+;+;+;+;+;+;+;+;+;+;+;+;+;+;+;+;+;+;+;+;+;+;+;+;+;+;+;+;+;+;+;+;+;+;+;+;+;+;+;+;+;+;+;+;+;+;+;+;+;+;+;+;+;+;+;+;+;+;+;+;+;+;+;+;+;+;+;+;+;+;+;+;+;+;+;+;+;+;+;+;+;+;+;+;+;+;+;+;+;+;+;+;+;+;+;+;+;+;+;+;+;+;+;+;+;+	10807	5.94204	5.58642	6.08932	2.22754	2.27279	3.3523	4.36827e-07	1.09676e-05	1.08537
KIAA1614	1;1;1;1;1;1;1;1;1;1;1;1;1;1;1;1;1;1;1;1;1;1;1;1;1	180913154;180913189;180913834;180916154;180917851;180928147;180928430;180928455;180935115;180935115;180938555;180938555;180938555;180941045;180941045;180941045;180941193;180944389;180944389;180944389;180944389;180945303;180945303;180945303;180950340	180913293;180913293;180914056;180917100;180917914;180928573;180928573;180928573;180936670;180936670;180938711;180938711;180938711;180941285;180941285;180941285;180941285;180944516;180944516;180944516;180944516;180945487;180946102;180951614;180950925	+;+;+;+;+;+;+;+;+;+;+;+;+;+;+;+;+;+;+;+;+;+;+;+;+	10195	0.324973	0.314988	0.477062	0.134689	0.168894	0.146349	4.01078e-05	0.000326902	1.24001
KIAA1683	19;19;19;19;19;19;19;19;19;19;19;19;19;19;19;19;19;19;19;19;19;19;19;19;19;19;19;19;19;19;19;19	18257097;18257098;18257098;18257098;18257099;18264363;18264924;18264924;18264924;18266700;18267090;18267119;18267336;18267379;18267772;18267772;18269466;18269466;18269466;18269466;18269466;18269466;18269466;18269466;18274403;18274403;18274403;18274403;18274403;18274403;18274403;18274403	18258106;18258106;18258106;18258106;18262618;18267526;18267565;18265541;18267526;18267526;18267526;18267522;18267526;18267565;18267967;18267967;18269587;18269587;18269587;18269591;18269587;18269587;18269587;18269587;18274430;18274430;18274471;18274411;18274500;18274487;18274509;18274509	-;-;-;-;-;-;-;-;-;-;-;-;-;-;-;-;-;-;-;-;-;-;-;-;-;-;-;-;-;-;-;-	9154	1.41046	1.51657	1.99127	0.548458	0.531109	0.646874	3.56237e-08	1.821e-06	1.43002
KIF1A	2;2;2;2;2;2;2;2;2;2;2;2;2;2;2;2;2;2;2;2;2;2;2;2;2;2;2;2;2;2;2;2;2;2;2;2;2;2;2;2;2;2;2;2;2;2;2;2;2;2;2;2;2;2;2;2;2;2;2;2;2;2;2;2;2;2;2;2;2;2;2;2;2;2;2;2;2;2;2;2;2;2;2;2;2;2;2;2;2;2;2;2;2;2;2;2;2;2;2;2;2;2;2;2;2;2;2;2;2;2;2;2;2;2;2;2;2;2;2;2;2;2;2;2;2;2;2;2;2;2;2;2;2;2;2;2;2;2;2;2;2;2;2;2;2;2;2;2;2;2;2;2;2;2;2;2;2;2;2;2;2;2;2;2;2;2;2;2;2;2;2;2;2;2;2;2;2;2;2;2;2;2;2;2;2;2;2;2;2;2;2;2;2;2;2;2;2;2	240713764;240713764;240713764;240717020;240718050;240718050;240718050;240718050;240719006;240719006;240719006;240719006;240719149;240719774;240719774;240719774;240719774;240719774;240720627;240720914;240720914;240720914;240720914;240721807;240721807;240721807;240721807;240721807;240722456;240722456;240722456;240722456;240722456;240722544;240723413;240723413;240723413;240723413;240723413;240723487…	240717406;240717406;240717406;240717406;240718168;240718168;240718168;240718168;240719198;240719198;240719198;240719198;240719198;240720285;240719926;240719926;240719926;240719926;240721038;240721038;240721038;240721038;240721038;240721884;240721884;240721884;240721884;240721884;240722658;240722656;240722656;240722656;240722656;240722656;240723558;240723558;240723558;240723558;240723558;240723558…	-;-;-;-;-;-;-;-;-;-;-;-;-;-;-;-;-;-;-;-;-;-;-;-;-;-;-;-;-;-;-;-;-;-;-;-;-;-;-;-;-;-;-;-;-;-;-;-;-;-;-;-;-;-;-;-;-;-;-;-;-;-;-;-;-;-;-;-;-;-;-;-;-;-;-;-;-;-;-;-;-;-;-;-;-;-;-;-;-;-;-;-;-;-;-;-;-;-;-;-;-;-;-;-;-;-;-;-;-;-;-;-;-;-;-;-;-;-;-;-;-;-;-;-;-;-;-;-;-;-;-;-;-;-;-;-;-;-;-;-;-;-;-;-;-;-;-;-;-;-;-;-;-;-;-;-;-;-;-;-;-;-;-;-;-;-;-;-;-;-;-;-;-;-;-;-;-;-;-;-;-;-;-;-;-;-;-;-;-;-;-;-;-;-;-;-;-;-	12357	0.295715	0.275869	0.270382	0.864679	0.758197	0.875391	1.28995e-09	1.78561e-07	-1.65347
KIF3B	20;20;20;20;20;20;20;20;20	32277664;32309713;32316218;32316527;32316756;32326771;32327556;32330141;32331223	32277765;32311181;32316319;32316649;32316874;32326884;32327661;32330319;32335011	+;+;+;+;+;+;+;+;+	6103	4.81392	4.29851	4.79542	9.56937	9.14454	11.2917	5.72067e-10	9.30565e-08	-1.19087
KLF2	19;19;19;19;19	16324817;16324840;16325216;16326856;16326856	16324998;16324998;16326032;16327874;16327260	+;+;+;+;+	2018	0.941605	1.02824	0.964053	0.318962	0.476822	0.32347	0.00018465	0.0010631	1.31234
KLF7	2;2;2;2;2;2;2;2;2;2;2;2;2;2;2;2;2;2;2;2;2;2;2;2;2;2;2;2;2;2;2;2;2;2;2;2	207074137;207074137;207079090;207080361;207081016;207081016;207088458;207088458;207088458;207088458;207088458;207088458;207123774;207123774;207123774;207123898;207123976;207124169;207124325;207124344;207124344;207124353;207134067;207134067;207148982;207165467;207165467;207165467;207165467;207165467;207165467;207165913;207165913;207166757;207166994;207167140	207081264;207081264;207081264;207081264;207081264;207081264;207088581;207088581;207088581;207088581;207088581;207088581;207124404;207124404;207124404;207124404;207124404;207124404;207124404;207124404;207124408;207124404;207134137;207134137;207149200;207165706;207165706;207165706;207165571;207165945;207165706;207165975;207166186;207166847;207167267;207167246	-;-;-;-;-;-;-;-;-;-;-;-;-;-;-;-;-;-;-;-;-;-;-;-;-;-;-;-;-;-;-;-;-;-;-;-	9262	1.49922	1.77093	1.70778	0.542063	0.546788	0.599058	1.43172e-09	1.86624e-07	1.4775
KLF8	X;X;X;X;X;X;X;X;X;X;X;X;X;X;X;X;X;X;X;X;X;X;X;X;X;X	56232421;56232437;56232474;56233047;56233158;56233189;56250231;56250231;56250231;56250231;56265180;56265180;56265180;56265180;56265180;56268913;56269378;56269378;56269378;56270182;56270182;56270182;56284313;56284313;56284313;56284313	56233341;56232745;56233341;56233341;56233341;56233341;56250304;56250304;56250304;56250304;56265744;56269489;56265744;56269208;56265744;56268991;56269489;56269489;56269489;56270321;56270321;56270321;56285097;56284669;56287889;56287884	+;+;+;+;+;+;+;+;+;+;+;+;+;+;+;+;+;+;+;+;+;+;+;+;+;+	9022	0.135009	0.0985682	0.131256	0.0142688	0.0449066	0.0671843	0.00317955	0.0104178	1.46289
KLHL31	6;6;6;6;6	53647901;53651598;53654101;53654101;53665601	53652330;53652330;53655272;53655305;53665708	-;-;-;-;-	5743	0.279963	0.163449	0.191469	0.0448313	0.0793647	0.138018	0.00764035	0.021235	1.19446
KLHL4	X;X;X;X;X;X;X;X;X;X;X;X;X;X;X;X;X;X;X;X;X;X	87517749;87517814;87613877;87613877;87614434;87614434;87617932;87617932;87622211;87622211;87625610;87625610;87632210;87632210;87633749;87633749;87635563;87635563;87664764;87664764;87666475;87669329	87518315;87518315;87614044;87614044;87614570;87614570;87618128;87618128;87622423;87622423;87625796;87625796;87632434;87632434;87633911;87633911;87635775;87635775;87664935;87664935;87670050;87669596	+;+;+;+;+;+;+;+;+;+;+;+;+;+;+;+;+;+;+;+;+;+	5818	0.527585	0.80671	0.683311	0.39828	0.278548	0.248436	0.000350803	0.00176269	1.02887
KLK11	19;19;19;19;19;19;19;19;19;19;19;19;19;19;19;19;19;19;19;19;19;19;19;19;19;19;19;19;19;19;19;19;19;19;19;19;19;19;19;19;19;19;19;19;19;19;19;19;19;19;19;19;19;19;19	51022216;51022231;51022233;51022236;51022236;51022236;51022489;51022690;51023092;51023092;51023092;51023092;51023092;51023092;51023092;51023092;51023180;51024045;51024045;51024045;51024045;51024045;51024045;51024045;51024223;51024303;51024634;51024634;51024634;51024634;51024638;51024638;51024638;51024638;51024638;51025592;51025592;51025592;51025592;51025592;51025592;51025592;51025592;51025592;510…	51022697;51022697;51022697;51022697;51022664;51022697;51022697;51022697;51023228;51024310;51023228;51023228;51023228;51023228;51023228;51023228;51023228;51024310;51024381;51024310;51024310;51024211;51024310;51024310;51024310;51024310;51024794;51024794;51024794;51024794;51024794;51024794;51024794;51024794;51024794;51025666;51025698;51025666;51025666;51025666;51025666;51025666;51025666;51025666;510…	-;-;-;-;-;-;-;-;-;-;-;-;-;-;-;-;-;-;-;-;-;-;-;-;-;-;-;-;-;-;-;-;-;-;-;-;-;-;-;-;-;-;-;-;-;-;-;-;-;-;-;-;-;-;-	3113	0.375628	0.333279	0.393988	0.12406	0.146415	0.0898668	0.000489186	0.00229741	1.52525
KPNA5	6;6;6;6;6;6;6;6;6;6;6;6;6;6;6;6;6;6;6;6;6;6;6;6;6;6;6;6;6;6;6;6;6;6;6	116681187;116681187;116681211;116681447;116689320;116689320;116689320;116692055;116692055;116692055;116692293;116692293;116692293;116698704;116698704;116698704;116702019;116702019;116705072;116705072;116716219;116716219;116722126;116722126;116724297;116724297;116725751;116725751;116726495;116726495;116729563;116729563;116732136;116732136;116741506	116681338;116681338;116681338;116681552;116689453;116689453;116689453;116692156;116692156;116692156;116692392;116692392;116692392;116698798;116698798;116698798;116702150;116702150;116705160;116705160;116716318;116716318;116722289;116722289;116724375;116724375;116725876;116725876;116726622;116726622;116729741;116729741;116732368;116741866;116741866	+;+;+;+;+;+;+;+;+;+;+;+;+;+;+;+;+;+;+;+;+;+;+;+;+;+;+;+;+;+;+;+;+;+;+	11417	0.691335	0.874111	0.744575	0.353301	0.270583	0.322628	6.79285e-07	1.50501e-05	1.19636
KREMEN2	16;16;16;16;16;16;16;16;16;16;16;16;16;16;16;16;16;16;16;16;16;16;16;16;16;16;16;16;16;16;16;16;16;16;16;16;16;16;16;16;16;16;16;16;16;16;16;16;16	2963944;2964216;2964275;2964275;2964312;2964521;2964859;2964859;2964859;2964859;2964859;2964859;2966140;2966140;2966140;2966140;2966140;2966140;2966325;2966325;2966325;2966325;2966325;2966325;2966642;2966642;2966642;2966642;2966759;2966759;2966910;2966910;2966910;2966910;2966910;2966910;2967320;2967320;2967320;2967320;2967320;2967320;2967526;2967526;2967526;2967810;2967810;2967810;2967810	2964614;2964614;2964614;2964614;2964614;2964614;2965033;2965033;2965033;2965033;2965033;2965033;2966231;2966231;2966231;2966231;2966231;2966231;2966449;2966449;2966449;2966449;2966449;2966449;2966795;2966795;2966795;2966795;2966795;2966795;2967242;2967242;2967242;2967242;2967242;2967242;2967445;2967445;2967445;2967445;2968380;2967445;2968348;2967604;2967604;2968383;2968379;2968379;2968380	+;+;+;+;+;+;+;+;+;+;+;+;+;+;+;+;+;+;+;+;+;+;+;+;+;+;+;+;+;+;+;+;+;+;+;+;+;+;+;+;+;+;+;+;+;+;+;+;+	2614	0.298222	0.1512	0.43684	0.853624	0.73621	1.14157	6.86511e-05	0.000495709	-1.67441
KRT7	12;12;12;12;12;12;12;12;12;12;12;12;12;12;12;12;12;12;12;12;12;12;12;12;12;12;12;12;12;12;12;12;12;12;12;12;12;12;12;12;12;12;12;12;12	52232520;52232665;52233041;52233114;52233276;52233592;52235155;52235155;52237509;52237509;52238680;52238680;52238688;52238719;52241472;52241472;52241472;52241472;52241528;52241545;52243012;52243012;52243012;52243012;52243085;52243304;52244372;52244378;52245351;52245412;52245439;52245490;52247658;52247918;52248177;52248177;52248177;52248177;52248177;52248591;52248591;52248591;52248591;52248591;522…	52232791;52232791;52233148;52233620;52233440;52233620;52235366;52235366;52237717;52237569;52238775;52238775;52238775;52238775;52241971;52241508;52241636;52241636;52241636;52241636;52243137;52243411;52243137;52243137;52243137;52243541;52244577;52244611;52245632;52245632;52245632;52245632;52247790;52248211;52248211;52248211;52248211;52248211;52248211;52248921;52248925;52248855;52248688;52248921;522…	+;+;+;+;+;+;+;+;+;+;+;+;+;+;+;+;+;+;+;+;+;+;+;+;+;+;+;+;+;+;+;+;+;+;+;+;+;+;+;+;+;+;+;+;+	4093	7.68982	7.79755	6.78872	16.5857	17.273	15.3103	3.69184e-10	6.79386e-08	-1.22655
KRT81	12;12;12;12;12;12;12;12;12;12;12;12;12;12;12;12;12;12;12	52285913;52286255;52286354;52286791;52286791;52287102;52287102;52287596;52287596;52287984;52287984;52288361;52288361;52289215;52289215;52290078;52290078;52291097;52291097	52286493;52286290;52286493;52286822;52286822;52287322;52287322;52287721;52287721;52288148;52288148;52288456;52288456;52289275;52289275;52290286;52290286;52291515;52291534	-;-;-;-;-;-;-;-;-;-;-;-;-;-;-;-;-;-;-	1929	11.5428	11.5764	10.3923	49.2509	43.2399	41.4774	2.98412e-13	6.63939e-10	-2.08402
KRT83	12;12;12;12;12;12;12;12;12	52314301;52315312;52315893;52316468;52316859;52317681;52317910;52319156;52320952	52314818;52315343;52316113;52316593;52317023;52317776;52317970;52319364;52321398	-;-;-;-;-;-;-;-;-	1875	2.4426	2.52951	2.9774	11.6031	11.6683	10.668	3.25481e-12	2.82843e-09	-2.17168
KRT86	12;12;12;12;12;12;12;12;12;12;12;12;12;12;12;12;12;12;12;12;12;12;12	52249300;52274675;52275821;52301865;52301913;52301913;52303100;52303100;52303100;52304111;52304111;52304932;52304932;52305240;52305240;52305663;52305663;52306060;52306060;52308233;52308233;52308404;52308404	52249428;52274722;52275946;52302285;52302285;52302285;52303308;52303308;52303159;52304171;52304171;52305027;52305027;52305404;52305404;52305788;52305788;52306280;52306280;52308264;52308264;52309163;52309163	+;+;+;+;+;+;+;+;+;+;+;+;+;+;+;+;+;+;+;+;+;+;+	2394	2.97135	3.28126	3.33889	14.7876	14.935	14.0423	1.23641e-13	3.86797e-10	-2.2713
KRTCAP3	2;2;2;2;2;2;2;2;2;2;2;2;2;2;2;2;2;2;2;2;2;2;2;2;2;2;2;2;2;2;2;2;2;2;2;2;2	27442366;27442381;27442398;27442446;27442579;27442579;27442745;27442842;27442842;27442842;27442842;27443074;27443074;27443074;27443074;27443074;27443254;27443398;27443398;27443398;27443398;27443398;27443398;27443452;27443949;27443949;27443949;27443949;27443949;27443949;27443949;27444186;27444186;27444189;27444189;27446301;27446301	27442440;27442440;27442440;27442763;27442763;27442763;27442901;27442901;27442901;27442901;27442901;27443280;27443280;27443280;27443280;27443280;27443280;27443532;27443532;27443532;27443532;27443532;27443532;27443532;27444061;27444291;27444061;27444061;27444061;27444061;27444061;27444297;27444297;27444297;27444295;27446479;27446481	+;+;+;+;+;+;+;+;+;+;+;+;+;+;+;+;+;+;+;+;+;+;+;+;+;+;+;+;+;+;+;+;+;+;+;+;+	1403	1.63217	2.11281	1.65794	3.9149	3.86233	3.55593	3.75216e-06	5.30204e-05	-1.15449
LA16c-380H5.5	16	3006120	3007388	+	1269	1.38219	1.44048	1.49974	0.541037	0.199541	0.440907	5.94735e-05	0.00044405	1.75124
LCA5	6;6;6;6;6;6;6;6;6;6;6;6;6;6;6;6;6;6;6;6;6;6;6;6	79484991;79484991;79487828;79489084;79489084;79491588;79491588;79491588;79492551;79492551;79492551;79493613;79493613;79493613;79513212;79513212;79513212;79518705;79518705;79518705;79525164;79537116;79537165;79537243	79487866;79487866;79489216;79489216;79489216;79491730;79491730;79491730;79492647;79492647;79492647;79493750;79493750;79493750;79513741;79513741;79513741;79519085;79519085;79519085;79525269;79537430;79537408;79537458	-;-;-;-;-;-;-;-;-;-;-;-;-;-;-;-;-;-;-;-;-;-;-;-	5964	0.776089	0.82838	0.943145	0.40292	0.314187	0.476891	3.70053e-05	0.000308878	1.00709
LEPROTL1	8;8;8;8;8;8;8;8;8;8;8;8;8;8;8;8;8;8;8;8;8;8;8;8;8;8;8;8;8;8;8;8;8	30095398;30095410;30095420;30095425;30095480;30095487;30095649;30101898;30101898;30101898;30101898;30101898;30101898;30101940;30104300;30104300;30104300;30104300;30104300;30104300;30104300;30104300;30104734;30105746;30105746;30105746;30131976;30132375;30137272;30137272;30164111;30175085;30177126	30095528;30095528;30095528;30095528;30095528;30095528;30095888;30101973;30101973;30101973;30101973;30101973;30101973;30101973;30104486;30104486;30104486;30104486;30104486;30104486;30104486;30104486;30105087;30106089;30108524;30106028;30132183;30132489;30137697;30138348;30164175;30175190;30177208	+;+;+;+;+;+;+;+;+;+;+;+;+;+;+;+;+;+;+;+;+;+;+;+;+;+;+;+;+;+;+;+;+	5421	2.38173	3.07127	2.37169	5.28769	5.14749	4.86815	6.36236e-08	2.71172e-06	-1.05302
LGALS9	17;17;17;17;17;17;17;17;17;17;17;17;17;17;17;17;17;17;17;17;17;17;17;17;17;17;17;17;17;17;17;17;17;17;17;17;17;17;17;17;17;17;17;17;17;17;17;17;17;17;17;17;17;17;17;17;17;17;17;17;17;17;17;17;17;17;17;17;17;17;17;17;17;17;17;17;17;17;17;17;17;17;17;17;17;17;17;17;17;17;17;17;17;17;17;17;17;17;17;17;17;17	27629798;27629798;27631148;27631167;27631188;27631193;27631195;27631209;27631211;27631214;27631226;27638263;27638263;27638263;27638263;27638263;27638263;27638263;27638263;27638263;27638263;27640387;27640572;27640572;27640572;27640572;27640572;27640572;27640572;27640572;27640643;27640643;27640734;27640965;27642238;27642238;27642238;27642238;27642238;27642238;27642238;27642238;27642238;27642238;276…	27631304;27631304;27631304;27631304;27631304;27631304;27631304;27631304;27631304;27631304;27631304;27638354;27638724;27638354;27638354;27638354;27638354;27638354;27638354;27638354;27638354;27640773;27640773;27640773;27640773;27640773;27640773;27640773;27640773;27640773;27640773;27640773;27640773;27641023;27642348;27642348;27642348;27642348;27642348;27642348;27642423;27642348;27642348;27642348;276…	+;+;+;+;+;+;+;+;+;+;+;+;+;+;+;+;+;+;+;+;+;+;+;+;+;+;+;+;+;+;+;+;+;+;+;+;+;+;+;+;+;+;+;+;+;+;+;+;+;+;+;+;+;+;+;+;+;+;+;+;+;+;+;+;+;+;+;+;+;+;+;+;+;+;+;+;+;+;+;+;+;+;+;+;+;+;+;+;+;+;+;+;+;+;+;+;+;+;+;+;+;+	5714	0.0937946	0.0691699	0.051811	0.225294	0.186124	0.171359	0.000559733	0.00255778	-1.53102
LGI1	10;10;10;10;10;10;10;10;10;10;10;10;10;10;10;10;10;10;10;10;10;10;10;10;10;10;10;10;10;10;10;10;10;10;10;10;10;10;10;10;10;10;10;10;10;10;10;10;10;10;10;10;10;10;10;10;10;10;10;10;10;10;10;10;10;10;10;10;10;10;10;10;10;10;10;10;10;10;10;10;10;10;10;10;10;10;10;10;10;10;10;10;10;10;10;10;10;10;10;10;10;10;10;10;10;10;10;10;10;10;10;10;10;10;10;10;10;10;10;10;10;10;10;10;10;10;10;10;10;10;10;10;10;…	93757809;93757840;93757851;93757875;93757913;93757936;93757938;93757962;93757962;93757968;93757971;93757971;93757971;93757971;93757981;93758015;93758028;93758076;93758145;93758541;93758760;93758760;93758760;93758760;93758760;93758760;93758760;93758760;93758760;93758760;93758760;93758760;93758760;93758760;93758760;93758760;93758760;93758760;93758760;93758790;93763568;93776855;93776867;93777177;937…	93758359;93758368;93758359;93758368;93758359;93758368;93758359;93758359;93758359;93758364;93758359;93758008;93758276;93758359;93758359;93758359;93758359;93758368;93758359;93758688;93758831;93758831;93759130;93758831;93758831;93759291;93758831;93758831;93758831;93758831;93758831;93758831;93758831;93758831;93758912;93758831;93758831;93758831;93758831;93758831;93763625;93776880;93776939;93777450;937…	+;+;+;+;+;+;+;+;+;+;+;+;+;+;+;+;+;+;+;+;+;+;+;+;+;+;+;+;+;+;+;+;+;+;+;+;+;+;+;+;+;+;+;+;+;+;+;+;+;+;+;+;+;+;+;+;+;+;+;+;+;+;+;+;+;+;+;+;+;+;+;+;+;+;+;+;+;+;+;+;+;+;+;+;+;+;+;+;+;+;+;+;+;+;+;+;+;+;+;+;+;+;+;+;+;+;+;+;+;+;+;+;+;+;+;+;+;+;+;+;+;+;+;+;+;+;+;+;+;+;+;+;+;+;+;+;+;+;+;+;+;+;+;+;+;+;+;+;+;+;+;+;+;+;+;+;+;+;+;+;+;+;+;+;+;+;+	11108	0.697407	0.564853	0.643451	0.135208	0.109421	0.121728	8.47133e-10	1.28649e-07	2.28514
LHX6	9;9;9;9;9;9;9;9;9;9;9;9;9;9;9;9;9;9;9;9;9;9;9;9;9;9;9;9;9;9;9;9;9;9;9;9;9;9;9;9;9;9;9;9;9;9;9;9;9;9;9;9;9;9;9;9;9;9;9;9;9;9;9;9;9;9;9;9;9	122202577;122202579;122202579;122202579;122202583;122202931;122204255;122204432;122209614;122209614;122209614;122209614;122213606;122213606;122213606;122213606;122213606;122213606;122213606;122213606;122213974;122213974;122213974;122213974;122213974;122213974;122214283;122214283;122214283;122214283;122214283;122214283;122217068;122217068;122217068;122217068;122217068;122217068;122217083;122217105…	122204780;122204780;122204780;122204780;122204780;122204780;122204780;122204780;122209717;122209717;122209717;122209717;122213893;122213922;122213780;122213780;122213780;122213780;122213780;122213780;122214069;122214069;122214069;122214069;122214069;122214069;122214383;122214383;122214383;122214383;122214383;122214383;122217288;122217288;122217288;122217288;122217288;122217288;122217288;122217288…	-;-;-;-;-;-;-;-;-;-;-;-;-;-;-;-;-;-;-;-;-;-;-;-;-;-;-;-;-;-;-;-;-;-;-;-;-;-;-;-;-;-;-;-;-;-;-;-;-;-;-;-;-;-;-;-;-;-;-;-;-;-;-;-;-;-;-;-;-	5748	0.169527	0.0859509	0.161871	0.231427	0.246697	0.348802	0.00365935	0.0116412	-1.05235
LINC00243	6;6;6;6	30798654;30812866;30830515;30830515	30798772;30814772;30830659;30830659	-;-;-;-	2171	2.93993	2.91285	2.57145	1.00804	1.0264	1.24565	6.96611e-07	1.52184e-05	1.27465
LINC00265	7;7;7;7;7;7;7;7;7;7;7;7;7;7;7;7	39733632;39767404;39771005;39779271;39780503;39781235;39781689;39781744;39782735;39782735;39788482;39788482;39789354;39789354;39791594;39791744	39734044;39767670;39771091;39779385;39780624;39781351;39781896;39781885;39782799;39782799;39788604;39788604;39789425;39789544;39791651;39793092	+;+;+;+;+;+;+;+;+;+;+;+;+;+;+;+	3115	0.828978	0.602688	0.692431	0.22041	0.325159	0.389173	0.00073679	0.0031978	1.10661
LINC00271	6;6;6;6;6;6;6;6;6;6;6;6;6;6;6;6;6;6;6;6;6;6;6;6;6;6	135497801;135497806;135497854;135497937;135497956;135497969;135498404;135498404;135498404;135498404;135499352;135514060;135516881;135518593;135518593;135518593;135520892;135631611;135635689;135642193;135642193;135672294;135672314;135689623;135689623;135715822	135498000;135498000;135498000;135498000;135498000;135498000;135498517;135498517;135498517;135498517;135499441;135514166;135517059;135518830;135518789;135518789;135521149;135631740;135635851;135642955;135642276;135672429;135672429;135689736;135690835;135716055	+;+;+;+;+;+;+;+;+;+;+;+;+;+;+;+;+;+;+;+;+;+;+;+;+;+	3825	0.191067	0.271241	0.265365	0.0673114	0.0529605	0.0853284	0.000597248	0.00270082	1.71619
LINC00342	2;2;2;2;2;2;2	95807118;95807118;95813316;95813909;95814050;95814050;95814671	95807302;95807302;95813533;95813957;95814145;95816215;95814776	-;-;-;-;-;-;-	2618	4.50372	4.84988	6.46182	2.08163	1.43148	2.7427	1.52823e-05	0.000156117	1.25353
LINC00365	13;13;13;13	30103178;30107599;30108769;30108769	30105695;30107971;30108875;30108868	-;-;-;-	2998	4.81045	4.77896	4.99386	1.5172	1.63856	2.00625	3.90259e-09	3.76816e-07	1.41723
LINC00578	3;3;3;3;3;3;3;3;3;3;3	177441921;177441964;177539395;177617590;177629417;177629417;177676710;177751911;177751911;177751911;177751911	177442110;177442110;177539493;177617703;177629555;177629555;177677006;177752305;177752094;177752094;177752132	+;+;+;+;+;+;+;+;+;+;+	1234	1.18449	1.04094	1.16527	0.556383	0.451441	0.491196	0.00187672	0.00679371	1.08238
LINC00592	12;12;12;12;12	52210930;52212044;52212599;52221977;52223446	52211020;52212156;52213027;52222028;52223804	+;+;+;+;+	1044	0.513355	0.331257	0.729183	0.98646	1.45527	0.848555	0.00787835	0.021788	-1.10704
LINC00689	7;7;7;7;7;7;7;7;7;7;7;7;7;7;7	159006522;159008354;159008421;159008550;159016458;159016458;159017408;159020307;159020307;159020485;159021673;159021673;159021673;159025167;159026240	159006827;159009438;159009438;159008789;159017646;159017646;159017646;159020848;159020848;159020848;159021797;159021797;159022680;159026238;159030195	+;+;+;+;+;+;+;+;+;+;+;+;+;+;+	9158	0.218127	0.107894	0.189342	0.10777	0.0608297	0.0712778	0.00844435	0.0230276	1.0015
LINC00957	7;7;7;7	44039171;44039523;44039894;44039894	44039283;44039699;44041103;44042306	+;+;+;+	2703	0.504705	0.255888	0.594569	0.23813	0.18736	0.206996	0.0120915	0.0306043	1.01551
LINC00998	7;7;7;7;7;7;7;7;7;7	113116718;113116861;113117257;113117483;113118068;113118068;113118068;113118440;113118528;113118528	113117607;113117607;113117607;113118161;113118534;113118161;113118161;113118560;113118554;113118613	-;-;-;-;-;-;-;-;-;-	1896	3.03228	3.93465	3.2121	1.49374	1.22869	1.72142	7.66174e-06	9.18352e-05	1.10628
LINC01003	7	152463786	152465549	+	1764	1.76769	1.62441	1.63033	0.778431	0.660317	0.898685	0.000176993	0.00103111	1.01317
LINC01021	5;5;5;5;5;5;5;5;5;5;5;5;5;5;5;5;5;5;5;5;5;5;5;5;5;5	27472292;27472292;27472307;27472307;27472307;27475535;27475535;27475535;27475535;27475535;27475665;27476069;27477639;27477639;27477639;27484926;27484926;27484926;27484926;27489282;27489282;27494119;27494235;27494235;27494235;27495949	27472519;27472519;27472519;27472519;27472519;27475695;27475695;27475695;27475695;27475695;27475695;27476158;27477801;27477801;27477801;27485186;27485029;27485029;27486146;27489386;27489386;27494318;27494318;27494318;27494335;27496401	+;+;+;+;+;+;+;+;+;+;+;+;+;+;+;+;+;+;+;+;+;+;+;+;+;+	2638	1.23744	1.57316	2.00401	0.731992	0.537535	0.954434	0.000345258	0.00174154	1.03099
LINC01125	2;2;2;2;2;2;2;2;2;2;2;2;2;2;2;2;2;2;2;2;2;2;2;2;2;2;2;2;2;2;2;2;2;2;2;2;2;2;2;2;2;2;2;2;2;2;2;2;2;2;2;2;2;2;2;2;2;2;2;2;2;2;2;2;2;2;2;2;2;2;2;2;2;2;2;2;2;2;2;2;2;2;2;2;2;2;2;2;2;2;2;2;2;2;2;2;2;2;2;2;2;2;2;2;2;2;2;2;2;2;2;2;2;2;2;2;2;2;2;2;2;2;2;2;2;2;2;2;2;2;2;2;2;2;2;2;2;2;2;2;2;2;2;2;2;2;2;2;2;2;2;2;2;2;2;2;2;2;2;2;2;2;2;2;2;2;2;2;2;2;2;2;2;2;2;2;2;2;2;2;2;2;2;2;2;2;2;2;2;2;2;2;2;2;2;2;2;2;2;2…	97664217;97664239;97664239;97664239;97664247;97664247;97664261;97664261;97664272;97665803;97665803;97665803;97665824;97666904;97666904;97666904;97666904;97666957;97667964;97668091;97668648;97669180;97669686;97669690;97669690;97669713;97669743;97669743;97669743;97669746;97669776;97669793;97669793;97669793;97669793;97669793;97669793;97669793;97669793;97669793;97669793;97669793;97669793;97669793;976…	97664472;97664472;97664472;97664472;97664472;97664472;97664472;97664472;97664472;97665940;97665940;97665940;97665920;97667054;97667054;97667054;97667054;97667054;97668073;97668627;97669122;97669834;97669834;97669834;97669834;97669834;97669834;97669834;97669834;97669834;97669834;97669834;97669834;97669834;97669834;97669834;97669834;97669834;97669834;97669834;97669834;97669834;97669834;97669834;976…	+;+;+;+;+;+;+;+;+;+;+;+;+;+;+;+;+;+;+;+;+;+;+;+;+;+;+;+;+;+;+;+;+;+;+;+;+;+;+;+;+;+;+;+;+;+;+;+;+;+;+;+;+;+;+;+;+;+;+;+;+;+;+;+;+;+;+;+;+;+;+;+;+;+;+;+;+;+;+;+;+;+;+;+;+;+;+;+;+;+;+;+;+;+;+;+;+;+;+;+;+;+;+;+;+;+;+;+;+;+;+;+;+;+;+;+;+;+;+;+;+;+;+;+;+;+;+;+;+;+;+;+;+;+;+;+;+;+;+;+;+;+;+;+;+;+;+;+;+;+;+;+;+;+;+;+;+;+;+;+;+;+;+;+;+;+;+;+;+;+;+;+;+;+;+;+;+;+;+;+;+;+;+;+;+;+;+;+;+;+;+;+;+;+;+;+;+;+;+;+…	6501	0.209847	0.113993	0.266728	0.105611	0.0623208	0.064549	0.0046508	0.0141924	1.24964
LINC01166	10;10	132943967;132965186	132946481;132965289	-;-	2619	0.725528	0.641373	0.710529	0.18023	0.193369	0.373862	0.000354402	0.00177849	1.38832
LINC01239	9;9;9;9;9;9;9;9	22646200;22674443;22682470;22682610;22687547;22723309;22820738;22823252	22646296;22674643;22682713;22682713;22687627;22723430;22821598;22824213	+;+;+;+;+;+;+;+	2568	1.59371	1.48137	1.35046	0.350908	0.354978	0.581008	1.62267e-06	2.79228e-05	1.69309
LINC01587	4;4;4;4;4;4;4;4;4;4;4;4	5524569;5525156;5525390;5525407;5526195;5526216;5526216;5527152;5527388;5527388;5527388;5527388	5524728;5525496;5525496;5525496;5526333;5526333;5526333;5527261;5527801;5527801;5527595;5527800	+;+;+;+;+;+;+;+;+;+;+;+	1164	1.25572	1.40065	1.30802	0.700437	0.739638	0.280396	0.00404775	0.0126428	1.11431
LINGO1	15;15;15;15;15;15;15;15;15;15;15;15;15;15;15;15;15;15;15;15;15;15;15;15;15;15;15;15;15;15;15;15;15;15;15;15;15;15;15;15;15;15;15;15;15;15;15;15;15;15;15;15;15;15;15;15;15;15;15;15	77613027;77613670;77614944;77615353;77615513;77615673;77615722;77615782;77615833;77615854;77615877;77632310;77634276;77677089;77677089;77677089;77677089;77677089;77677089;77677089;77677089;77677107;77677109;77677156;77690720;77690720;77690720;77690720;77690720;77690720;77690720;77690720;77690720;77690720;77695971;77696391;77707394;77720617;77734992;77734992;77734992;77734992;77734992;77734992;777…	77615900;77615900;77615900;77615900;77615900;77615900;77615900;77615900;77615900;77615900;77615900;77632490;77634353;77677174;77677174;77677174;77677174;77677174;77677174;77677174;77677174;77677174;77677174;77677174;77690901;77690901;77690901;77690901;77690901;77690901;77690901;77690901;77690901;77690901;77696148;77696495;77707507;77720751;77735053;77735053;77735053;77735053;77735053;77735053;777…	-;-;-;-;-;-;-;-;-;-;-;-;-;-;-;-;-;-;-;-;-;-;-;-;-;-;-;-;-;-;-;-;-;-;-;-;-;-;-;-;-;-;-;-;-;-;-;-;-;-;-;-;-;-;-;-;-;-;-;-	4902	0.0596353	0.0604707	0.103531	0.218844	0.216955	0.199744	0.000570589	0.00259905	-1.55232
LL22NC03-2H8.5	22	22283928	22287220	-	3293	1.12447	1.75534	2.95393	0.390929	0.261445	0.481409	4.11885e-05	0.000333301	2.27808
LOXL1	15;15;15;15;15;15;15;15;15;15;15;15;15;15;15;15;15;15;15;15;15;15;15;15;15	73925989;73926458;73941875;73942854;73942854;73946368;73946417;73946417;73947067;73947067;73947067;73947216;73947807;73947807;73947807;73947828;73949459;73949459;73949459;73949459;73949459;73951831;73951831;73951831;73951831	73927885;73927885;73942058;73942962;73942962;73946554;73946554;73946554;73947223;73947223;73947223;73947902;73947902;73947902;73947902;73947902;73949574;73949575;73949537;73949574;73949574;73952137;73952137;73952136;73951919	+;+;+;+;+;+;+;+;+;+;+;+;+;+;+;+;+;+;+;+;+;+;+;+;+	3637	3.1883	3.65406	3.30247	12.0698	11.2789	12.1276	7.56684e-13	1.076e-09	-1.88942
LOXL1-AS1	15;15;15;15;15;15;15;15;15;15;15;15;15;15;15;15;15;15;15;15;15;15;15;15;15;15;15;15;15;15;15;15;15;15;15;15;15;15;15;15;15;15;15;15	73908071;73908196;73909772;73912185;73912185;73912185;73916304;73916343;73917468;73917596;73918761;73919028;73919040;73919059;73919155;73919161;73919203;73919838;73919838;73919838;73919838;73919838;73919838;73919838;73919838;73919838;73919960;73919960;73919960;73925270;73925270;73925270;73926240;73926240;73926240;73927654;73927654;73927654;73927777;73927777;73927777;73927777;73928065;73928065	73908548;73908548;73909850;73912303;73912303;73912303;73916447;73916447;73919383;73919383;73919383;73919383;73920038;73919383;73919383;73919383;73919383;73920038;73920038;73920038;73920038;73920038;73920038;73919870;73920038;73920038;73920038;73920038;73920038;73925505;73925505;73925505;73926342;73926298;73926331;73927695;73927695;73927786;73927940;73927959;73927960;73927942;73928203;73928248	-;-;-;-;-;-;-;-;-;-;-;-;-;-;-;-;-;-;-;-;-;-;-;-;-;-;-;-;-;-;-;-;-;-;-;-;-;-;-;-;-;-;-;-	4221	1.8353	1.72056	1.95382	6.18097	6.79086	7.58872	3.14268e-12	2.82843e-09	-1.97858
LPCAT1	5;5;5;5;5;5;5;5;5;5;5;5;5;5;5;5;5;5;5;5;5;5;5;5;5;5;5;5;5;5;5;5;5;5;5;5;5;5;5;5;5;5;5;5;5;5;5;5;5;5	1456480;1460123;1461190;1461423;1461429;1461840;1466749;1466749;1466749;1467181;1470826;1470826;1473957;1473957;1474560;1474560;1477404;1477404;1479476;1479621;1479621;1480942;1480942;1480942;1483428;1483428;1483428;1483428;1488377;1488391;1488391;1488391;1488391;1489746;1489746;1489746;1489746;1489746;1494700;1494700;1494700;1494700;1494700;1501461;1501461;1501461;1521347;1523710;1523710;1523710	1458091;1460378;1461397;1463835;1463835;1463835;1466890;1466890;1466890;1467325;1470924;1470924;1474110;1474110;1474685;1474685;1477486;1477486;1479675;1479675;1479675;1480976;1480976;1480976;1483486;1483486;1483486;1483486;1488451;1488451;1488451;1488451;1488451;1489858;1489858;1489858;1489858;1489858;1494928;1494914;1494778;1494914;1494914;1501603;1501603;1501603;1521480;1523740;1523977;1523962	-;-;-;-;-;-;-;-;-;-;-;-;-;-;-;-;-;-;-;-;-;-;-;-;-;-;-;-;-;-;-;-;-;-;-;-;-;-;-;-;-;-;-;-;-;-;-;-;-;-	6494	24.6911	21.5603	24.5328	6.33687	6.34798	8.51529	8.45142e-11	2.27926e-08	1.65792
LRP1	12;12;12;12;12;12;12;12;12;12;12;12;12;12;12;12;12;12;12;12;12;12;12;12;12;12;12;12;12;12;12;12;12;12;12;12;12;12;12;12;12;12;12;12;12;12;12;12;12;12;12;12;12;12;12;12;12;12;12;12;12;12;12;12;12;12;12;12;12;12;12;12;12;12;12;12;12;12;12;12;12;12;12;12;12;12;12;12;12;12;12;12;12;12;12;12;12;12;12;12;12;12;12;12;12;12;12;12;12;12;12;12;12;12;12;12;12;12;12;12;12;12;12;12;12;12;12;12;12;12;12;12;12;…	57128493;57128499;57128716;57128909;57138459;57138459;57138459;57138459;57141374;57141374;57141374;57141374;57143679;57143679;57143679;57143679;57144972;57144972;57144972;57144972;57145227;57145227;57145227;57145227;57148981;57149680;57154208;57154208;57154479;57154479;57156094;57156777;57158402;57159825;57160893;57162317;57162858;57164428;57165805;57166084;57166084;57166930;57167444;57167445;571…	57129031;57129031;57129031;57129031;57138581;57138581;57138581;57138581;57141511;57141511;57141511;57141511;57143798;57143798;57143798;57143798;57145100;57145100;57145100;57145100;57145490;57145490;57145490;57145490;57150059;57150059;57154370;57154370;57155593;57154701;57156283;57156920;57158638;57160005;57161115;57162518;57162983;57165945;57165945;57166412;57166209;57167046;57167524;57167524;571…	+;+;+;+;+;+;+;+;+;+;+;+;+;+;+;+;+;+;+;+;+;+;+;+;+;+;+;+;+;+;+;+;+;+;+;+;+;+;+;+;+;+;+;+;+;+;+;+;+;+;+;+;+;+;+;+;+;+;+;+;+;+;+;+;+;+;+;+;+;+;+;+;+;+;+;+;+;+;+;+;+;+;+;+;+;+;+;+;+;+;+;+;+;+;+;+;+;+;+;+;+;+;+;+;+;+;+;+;+;+;+;+;+;+;+;+;+;+;+;+;+;+;+;+;+;+;+;+;+;+;+;+;+;+;+;+;+;+;+;+;+;+;+;+;+;+;+;+;+;+;+;+	20839	0.376421	0.443335	0.576376	0.195621	0.170116	0.288629	8.87866e-05	0.000600523	1.01382
LRP1B	2;2;2;2;2;2;2;2;2;2;2;2;2;2;2;2;2;2;2;2;2;2;2;2;2;2;2;2;2;2;2;2;2;2;2;2;2;2;2;2;2;2;2;2;2;2;2;2;2;2;2;2;2;2;2;2;2;2;2;2;2;2;2;2;2;2;2;2;2;2;2;2;2;2;2;2;2;2;2;2;2;2;2;2;2;2;2;2;2;2;2;2;2;2;2;2;2;2;2;2;2;2;2;2;2;2;2;2;2;2;2;2;2;2;2;2;2;2;2;2;2;2;2;2;2;2;2;2;2;2;2	140231423;140231772;140234786;140238152;140238152;140238182;140239442;140239442;140239442;140247086;140247086;140247086;140269268;140270242;140270242;140270242;140274424;140274424;140274424;140297808;140297808;140297808;140314935;140314935;140321963;140321963;140323893;140323893;140325762;140325762;140334453;140334453;140335615;140335615;140350797;140350797;140352953;140352953;140356342;140356342…	140233326;140233326;140234884;140238296;140238296;140238296;140239532;140239532;140239532;140247162;140247162;140247162;140269381;140270346;140270346;140270346;140274598;140274598;140274598;140297969;140297969;140297969;140315099;140315099;140322088;140322088;140324066;140324066;140325878;140325878;140334559;140334559;140335838;140335838;140351038;140351038;140353072;140353072;140356476;140356476…	-;-;-;-;-;-;-;-;-;-;-;-;-;-;-;-;-;-;-;-;-;-;-;-;-;-;-;-;-;-;-;-;-;-;-;-;-;-;-;-;-;-;-;-;-;-;-;-;-;-;-;-;-;-;-;-;-;-;-;-;-;-;-;-;-;-;-;-;-;-;-;-;-;-;-;-;-;-;-;-;-;-;-;-;-;-;-;-;-;-;-;-;-;-;-;-;-;-;-;-;-;-;-;-;-;-;-;-;-;-;-;-;-;-;-;-;-;-;-;-;-;-;-;-;-;-;-;-;-;-;-	17040	0.303083	0.34502	0.372294	0.14354	0.0921331	0.139549	1.71406e-06	2.89852e-05	1.35028
LRRC37A3	17;17;17;17;17;17;17;17;17;17;17;17;17;17;17;17;17;17;17;17;17;17;17;17;17;17;17;17;17;17;17;17;17;17;17;17;17;17;17;17;17;17;17;17;17;17;17;17;17;17;17;17;17;17;17;17;17;17;17;17;17;17;17;17;17;17;17;17;17;17;17;17;17;17;17;17;17;17;17;17;17;17;17;17;17;17	64854312;64854362;64854364;64854370;64854370;64854371;64855840;64855840;64855840;64855840;64855840;64855840;64858779;64858779;64858779;64858779;64858779;64859442;64859442;64859442;64859442;64859442;64859442;64860786;64860852;64862900;64862900;64862900;64862900;64862900;64862900;64862900;64862933;64868462;64868462;64868462;64868462;64868462;64868462;64868500;64869095;64869095;64869095;64869095;648…	64854644;64854644;64854644;64854644;64854644;64854644;64855889;64855889;64855889;64855889;64855889;64855889;64858883;64858883;64858883;64858883;64858883;64859627;64860973;64860973;64860973;64860973;64860973;64860973;64860973;64863018;64863018;64863018;64863585;64863018;64863018;64863018;64863018;64868536;64868536;64868536;64868536;64868536;64868536;64868536;64869166;64869166;64869166;64869166;648…	-;-;-;-;-;-;-;-;-;-;-;-;-;-;-;-;-;-;-;-;-;-;-;-;-;-;-;-;-;-;-;-;-;-;-;-;-;-;-;-;-;-;-;-;-;-;-;-;-;-;-;-;-;-;-;-;-;-;-;-;-;-;-;-;-;-;-;-;-;-;-;-;-;-;-;-;-;-;-;-;-;-;-;-;-;-	7641	1.65149	1.24142	1.45016	0.533509	0.636274	0.79937	3.57531e-06	5.11665e-05	1.06164
LRRC4	7;7;7;7;7;7;7;7;7;7	128027071;128030159;128030357;128030489;128030913;128030913;128030913;128030913;128031507;128032015	128030740;128030622;128030740;128030740;128030996;128030996;128031005;128031070;128031621;128032107	-;-;-;-;-;-;-;-;-;-	4036	0.108647	0.12241	0.115267	0.318962	0.263507	0.392785	0.000181918	0.00105196	-1.56823
LRRC49	15;15;15;15;15;15;15;15;15;15;15;15;15;15;15;15;15;15;15;15;15;15;15;15;15;15;15;15;15;15;15;15;15;15;15;15;15;15;15;15;15;15;15;15;15;15;15;15;15;15;15;15;15;15;15;15;15;15;15;15;15;15;15;15;15;15;15;15;15;15;15;15;15;15;15;15;15;15;15;15;15;15;15;15;15;15;15;15;15;15;15;15;15;15;15;15;15;15;15;15;15;15;15;15;15;15;15;15;15;15;15;15;15;15;15;15;15;15;15;15;15;15;15;15;15;15;15;15;15;15;15;15;15;…	70853239;70853378;70853378;70872908;70872908;70892443;70892443;70892471;70892595;70892626;70892635;70892796;70892845;70892848;70892849;70892862;70893240;70893584;70893584;70893584;70893584;70893584;70893584;70893584;70893584;70893584;70893584;70893584;70893584;70893584;70893584;70894572;70894572;70894572;70895539;70895601;70895639;70895849;70895849;70895849;70895849;70895849;70895849;70895849;708…	70853469;70853469;70853469;70873223;70873223;70892942;70892942;70892942;70892942;70892942;70892942;70892942;70892942;70892942;70892942;70892942;70893341;70893640;70893640;70893640;70893640;70893640;70893640;70893640;70893655;70893640;70893640;70893640;70893640;70893640;70893640;70894755;70894755;70894669;70895700;70895936;70895735;70895936;70895936;70895936;70895936;70895936;70895936;70895936;708…	+;+;+;+;+;+;+;+;+;+;+;+;+;+;+;+;+;+;+;+;+;+;+;+;+;+;+;+;+;+;+;+;+;+;+;+;+;+;+;+;+;+;+;+;+;+;+;+;+;+;+;+;+;+;+;+;+;+;+;+;+;+;+;+;+;+;+;+;+;+;+;+;+;+;+;+;+;+;+;+;+;+;+;+;+;+;+;+;+;+;+;+;+;+;+;+;+;+;+;+;+;+;+;+;+;+;+;+;+;+;+;+;+;+;+;+;+;+;+;+;+;+;+;+;+;+;+;+;+;+;+;+;+;+;+;+;+;+;+;+;+;+;+;+;+;+;+;+;+;+;+;+;+;+;+;+;+;+;+;+;+;+;+;+;+;+;+;+;+;+;+;+;+;+;+;+;+;+;+;+;+;+;+;+;+;+;+;+;+;+;+;+;+;+;+;+;+;+;+;+…	9991	0.0585191	0.0494491	0.0677291	0.158914	0.152067	0.126003	0.000292661	0.00153206	-1.38177
LRRC6	8;8;8;8;8;8;8;8;8;8;8;8;8;8;8;8;8;8;8;8;8;8;8;8;8;8;8;8;8;8;8;8;8;8;8;8;8;8;8;8;8;8;8;8;8;8;8;8;8;8;8;8;8;8;8;8;8;8;8;8;8;8;8;8;8;8;8;8;8;8;8;8;8;8;8;8;8;8;8;8;8;8;8;8;8;8;8;8;8;8;8;8;8;8;8;8;8;8;8;8;8	132571953;132571953;132572070;132572199;132572199;132572201;132572425;132578408;132578408;132583694;132583694;132583694;132583694;132583694;132583694;132583694;132608405;132610162;132610162;132610162;132610162;132610166;132610166;132610166;132610166;132611294;132611294;132611294;132611294;132611294;132611294;132611294;132611294;132615038;132615038;132615038;132615038;132615038;132615038;132615038…	132572480;132572480;132572480;132572480;132572480;132572480;132572480;132578516;132578516;132583775;132583779;132583775;132583775;132583775;132583779;132583779;132608553;132610261;132610252;132610261;132610261;132610261;132610252;132610261;132610261;132611363;132611363;132611363;132611363;132611363;132611363;132611363;132611363;132615097;132615097;132615097;132615097;132615097;132615097;132615097…	-;-;-;-;-;-;-;-;-;-;-;-;-;-;-;-;-;-;-;-;-;-;-;-;-;-;-;-;-;-;-;-;-;-;-;-;-;-;-;-;-;-;-;-;-;-;-;-;-;-;-;-;-;-;-;-;-;-;-;-;-;-;-;-;-;-;-;-;-;-;-;-;-;-;-;-;-;-;-;-;-;-;-;-;-;-;-;-;-;-;-;-;-;-;-;-;-;-;-;-;-	2778	0.0701541	0.142274	0.25881	0.463402	0.528676	0.285328	0.00282411	0.00947142	-1.47129
LRRD1	7;7;7;7;7;7;7;7;7;7;7;7;7;7;7;7;7;7;7;7;7;7;7;7;7;7;7;7	92112159;92117044;92118520;92123120;92123734;92126253;92127505;92128880;92131774;92141643;92144842;92144884;92146083;92146083;92150534;92150534;92150534;92150534;92159005;92159005;92159005;92163286;92163286;92165026;92178972;92179007;92179007;92179007	92113843;92117212;92118615;92123315;92123853;92126427;92127631;92129056;92131872;92142829;92145074;92145074;92146200;92146200;92150695;92150695;92150695;92150695;92159203;92159203;92159203;92165276;92165276;92165276;92179127;92179133;92179531;92179511	-;-;-;-;-;-;-;-;-;-;-;-;-;-;-;-;-;-;-;-;-;-;-;-;-;-;-;-	7294	6.22552	5.61508	5.51996	12.3779	11.8173	12.2478	9.76358e-11	2.428e-08	-1.15325
LTBP1	2;2;2;2;2;2;2;2;2;2;2;2;2;2;2;2;2;2;2;2;2;2;2;2;2;2;2;2;2;2;2;2;2;2;2;2;2;2;2;2;2;2;2;2;2;2;2;2;2;2;2;2;2;2;2;2;2;2;2;2;2;2;2;2;2;2;2;2;2;2;2;2;2;2;2;2;2;2;2;2;2;2;2;2;2;2;2;2;2;2;2;2;2;2;2;2;2;2;2;2;2;2;2;2;2;2;2;2;2;2;2;2;2;2;2;2;2;2;2;2;2;2;2;2;2;2;2;2;2;2;2;2;2;2;2;2;2;2;2;2;2;2;2;2;2;2;2;2;2;2;2;2;2;2;2;2;2;2;2;2;2;2;2;2;2;2;2;2;2;2;2;2;2;2;2;2;2;2;2;2;2;2;2;2;2;2;2;2;2;2;2;2;2;2	32946972;32948875;33020909;33110582;33134406;33134597;33134625;33134639;33134657;33134793;33134793;33186856;33186856;33186856;33186856;33186856;33186856;33188577;33188577;33188577;33188577;33188577;33188577;33217552;33217552;33217552;33217552;33217552;33222080;33222080;33222080;33222080;33222080;33243662;33243662;33243662;33243662;33243662;33243662;33252677;33252677;33252677;33252677;33252677;332…	32947818;32948945;33021206;33110751;33134505;33134960;33134960;33134960;33134960;33134960;33134960;33187080;33187080;33187080;33187080;33187080;33187080;33188851;33188851;33188851;33188676;33188851;33188851;33217654;33217654;33217654;33217654;33217654;33222151;33222151;33222151;33222151;33222151;33243784;33243784;33243784;33243784;33243784;33243784;33252844;33252844;33252844;33252844;33252844;332…	+;+;+;+;+;+;+;+;+;+;+;+;+;+;+;+;+;+;+;+;+;+;+;+;+;+;+;+;+;+;+;+;+;+;+;+;+;+;+;+;+;+;+;+;+;+;+;+;+;+;+;+;+;+;+;+;+;+;+;+;+;+;+;+;+;+;+;+;+;+;+;+;+;+;+;+;+;+;+;+;+;+;+;+;+;+;+;+;+;+;+;+;+;+;+;+;+;+;+;+;+;+;+;+;+;+;+;+;+;+;+;+;+;+;+;+;+;+;+;+;+;+;+;+;+;+;+;+;+;+;+;+;+;+;+;+;+;+;+;+;+;+;+;+;+;+;+;+;+;+;+;+;+;+;+;+;+;+;+;+;+;+;+;+;+;+;+;+;+;+;+;+;+;+;+;+;+;+;+;+;+;+;+;+;+;+;+;+;+;+;+;+;+;+	7329	2.73891	2.39305	3.16228	0.75529	0.725551	1.14513	3.73541e-08	1.89092e-06	1.57833
LXN	3;3;3;3;3;3;3;3;3;3	158645822;158666414;158667012;158667012;158668996;158668996;158669433;158669433;158670957;158672350	158646209;158666744;158667074;158667074;158669132;158669132;158669610;158669593;158671019;158672693	-;-;-;-;-;-;-;-;-;-	1504	295.086	289.562	262.023	748.575	756.386	656.017	5.02691e-11	1.57262e-08	-1.4356
LY6D	8;8;8;8;8;8;8;8;8	142784880;142784882;142784882;142785295;142785589;142785589;142785589;142786465;142786465	142785456;142786304;142785456;142785456;142785761;142785687;142785932;142786529;142786592	-;-;-;-;-;-;-;-;-	1553	0.972558	0.954371	0.762519	0.303941	0.0652202	0.570439	0.00507932	0.0152937	1.39619
LY6E	8;8;8;8;8;8;8;8;8;8;8;8;8;8;8;8;8;8;8;8;8;8;8;8;8;8;8;8;8;8;8;8;8;8;8;8;8;8;8;8;8;8;8;8;8;8;8;8;8;8;8;8;8;8;8;8;8;8;8;8;8;8	143017982;143018482;143018483;143018517;143018528;143018528;143018529;143018529;143018542;143018544;143018546;143018552;143018553;143018557;143018833;143018833;143020262;143020262;143020262;143020883;143020883;143020883;143020883;143020883;143020883;143020888;143020888;143020888;143020888;143020888;143020888;143020888;143020917;143021314;143021314;143021314;143021314;143021314;143021314;143021314…	143018247;143018586;143018586;143018586;143018586;143018586;143018586;143018586;143018586;143018586;143018586;143018586;143018586;143018586;143019119;143019119;143020377;143020377;143020377;143020991;143020991;143020991;143020991;143020991;143020991;143020991;143020991;143020991;143020991;143020991;143020991;143020991;143020991;143021433;143021433;143021433;143021433;143021433;143021433;143021433…	+;+;+;+;+;+;+;+;+;+;+;+;+;+;+;+;+;+;+;+;+;+;+;+;+;+;+;+;+;+;+;+;+;+;+;+;+;+;+;+;+;+;+;+;+;+;+;+;+;+;+;+;+;+;+;+;+;+;+;+;+;+	2640	16.4806	15.5138	15.1869	38.9612	39.5556	33.5742	7.55633e-11	2.14902e-08	-1.33282
MACROD2	20;20;20;20;20;20;20;20;20;20;20;20;20;20;20;20;20;20;20;20;20;20;20;20;20;20;20;20;20;20;20;20;20;20;20;20;20;20;20;20;20;20;20;20;20;20;20;20;20;20;20;20;20;20;20;20;20;20;20;20;20;20;20;20;20;20;20;20;20;20;20;20;20;20;20;20;20;20;20;20;20;20;20;20;20;20;20;20;20	13995369;13995495;13995502;13995503;13995681;13995737;13995773;14002288;14002288;14002288;14002288;14002288;14002288;14002288;14051799;14051922;14051922;14053099;14053144;14085621;14085621;14085621;14085621;14493479;14493479;14493479;14493479;14493479;14523391;14523398;14566566;14684843;14684843;14684843;14684843;14684843;14849904;14849904;14888143;14892703;15196858;15229940;15229940;15431405;154…	13995809;13995809;13995809;13995809;13995809;13995809;13995809;14002404;14002404;14002404;14002404;14002404;14002404;14002404;14051860;14052020;14052020;14053679;14053679;14085728;14085728;14085728;14085728;14493508;14493508;14493508;14494087;14493508;14523454;14523454;14566933;14684959;14684959;14684959;14685079;14684959;14850506;14850003;14888668;14895581;15197032;15230061;15230061;15431435;154…	+;+;+;+;+;+;+;+;+;+;+;+;+;+;+;+;+;+;+;+;+;+;+;+;+;+;+;+;+;+;+;+;+;+;+;+;+;+;+;+;+;+;+;+;+;+;+;+;+;+;+;+;+;+;+;+;+;+;+;+;+;+;+;+;+;+;+;+;+;+;+;+;+;+;+;+;+;+;+;+;+;+;+;+;+;+;+;+;+	11344	2.10883	2.0774	2.25183	0.748976	0.924118	0.91246	2.37444e-09	2.61556e-07	1.23707
MAFB	20	40685848	40689240	-	3393	5.51408	5.69325	6.36944	2.16262	2.44784	2.501	4.08004e-09	3.86268e-07	1.22567
MALL	2;2;2;2;2;2;2;2;2;2;2	110083870;110085023;110085712;110087572;110087572;110091603;110091603;110097499;110115688;110115688;110115688	110085757;110085757;110085757;110087697;110087697;110091770;110091770;110097604;110115821;110116566;110116022	-;-;-;-;-;-;-;-;-;-;-	3167	1.50766	1.37278	1.20187	3.79384	4.46149	3.82783	1.87234e-09	2.32064e-07	-1.65046
MALRD1	10;10;10;10;10;10;10;10;10;10;10;10;10;10;10;10;10;10;10;10;10;10;10;10;10;10;10;10;10;10;10;10;10;10;10;10;10;10;10;10;10;10;10;10;10;10;10;10;10;10;10;10;10;10;10;10;10;10;10;10;10;10;10;10;10;10;10;10;10;10;10;10;10;10;10;10;10;10;10;10;10;10;10;10;10;10;10	19048771;19066719;19087840;19088024;19103979;19123492;19124524;19128221;19133856;19136574;19146198;19155075;19165637;19175208;19203728;19203850;19204308;19204308;19204898;19204898;19209268;19209268;19257684;19257684;19280047;19280047;19283019;19283019;19323949;19323949;19327563;19327563;19331369;19331369;19347771;19347771;19352006;19352006;19387528;19387528;19389183;19389452;19389452;19450307;194…	19049137;19066859;19087934;19088185;19104075;19123593;19124670;19128387;19133948;19136781;19146344;19155172;19165810;19175328;19203880;19203880;19204413;19204413;19205265;19205265;19209680;19209680;19257771;19257771;19280223;19280223;19283181;19283181;19324105;19324105;19327673;19327673;19331582;19331582;19348018;19348018;19352297;19352297;19387773;19387773;19389362;19389609;19389609;19450490;194…	+;+;+;+;+;+;+;+;+;+;+;+;+;+;+;+;+;+;+;+;+;+;+;+;+;+;+;+;+;+;+;+;+;+;+;+;+;+;+;+;+;+;+;+;+;+;+;+;+;+;+;+;+;+;+;+;+;+;+;+;+;+;+;+;+;+;+;+;+;+;+;+;+;+;+;+;+;+;+;+;+;+;+;+;+;+;+	7781	2.15401	2.40642	2.859	0.579059	0.74849	0.84491	3.46827e-09	3.41199e-07	1.69629
MAOB	X;X;X;X;X;X;X;X;X;X;X;X;X;X;X;X;X;X;X;X;X;X;X;X;X	43766611;43768654;43769307;43775175;43778682;43780342;43781448;43793419;43795739;43797125;43797212;43802172;43802172;43803300;43803300;43838868;43838868;43843670;43843670;43843800;43844456;43844506;43882254;43882254;43882254	43767618;43768716;43769418;43775272;43778739;43780395;43781544;43793578;43795888;43797266;43797266;43802263;43802263;43803404;43803404;43839005;43839005;43843764;43843764;43843934;43844645;43844645;43882435;43882303;43882447	-;-;-;-;-;-;-;-;-;-;-;-;-;-;-;-;-;-;-;-;-;-;-;-;-	2891	0.893209	1.02535	0.994776	1.95927	2.06708	2.98367	1.41094e-06	2.5108e-05	-1.34462
MAP2	2;2;2;2;2;2;2;2;2;2;2;2;2;2;2;2;2;2;2;2;2;2;2;2;2;2;2;2;2;2;2;2;2;2;2;2;2;2;2;2;2;2;2;2;2;2;2;2;2;2;2;2;2;2;2;2;2;2;2;2;2;2;2;2;2;2;2;2;2;2;2;2;2;2;2;2;2;2;2;2;2;2;2;2;2;2;2;2;2;2;2;2;2;2;2;2;2;2;2;2;2;2;2;2;2;2;2;2;2;2;2;2;2	209424058;209507592;209579315;209579421;209579431;209579609;209580036;209580036;209580036;209580036;209580036;209580041;209625053;209625053;209625053;209625053;209625053;209625053;209653142;209653142;209653142;209653142;209653142;209653142;209653171;209653393;209661465;209661515;209678572;209678572;209678572;209678572;209678572;209678572;209678572;209678572;209678572;209678572;209680750;209680750…	209424276;209507641;209579438;209579755;209579755;209579755;209580100;209580100;209580100;209580100;209580100;209580100;209625129;209625129;209625129;209625129;209625129;209625129;209653432;209653432;209653432;209653432;209653432;209653432;209653432;209653432;209661678;209661678;209678685;209678685;209678685;209678685;209678685;209678685;209678685;209678685;209678628;209678685;209680827;209680827…	+;+;+;+;+;+;+;+;+;+;+;+;+;+;+;+;+;+;+;+;+;+;+;+;+;+;+;+;+;+;+;+;+;+;+;+;+;+;+;+;+;+;+;+;+;+;+;+;+;+;+;+;+;+;+;+;+;+;+;+;+;+;+;+;+;+;+;+;+;+;+;+;+;+;+;+;+;+;+;+;+;+;+;+;+;+;+;+;+;+;+;+;+;+;+;+;+;+;+;+;+;+;+;+;+;+;+;+;+;+;+;+;+	11559	3.50694	3.44494	3.90765	1.62601	1.6167	1.76677	1.96289e-09	2.38012e-07	1.03382
MAPK9	5;5;5;5;5;5;5;5;5;5;5;5;5;5;5;5;5;5;5;5;5;5;5;5;5;5;5;5;5;5;5;5;5;5;5;5;5;5;5;5;5;5;5;5;5;5;5;5;5;5;5;5;5;5;5;5;5;5;5;5;5;5;5;5;5;5;5;5;5;5;5;5;5;5;5;5;5;5;5;5;5;5;5;5;5;5;5;5;5;5;5;5;5;5;5;5;5;5;5;5;5;5;5;5;5;5;5;5;5	180233143;180233594;180233594;180233594;180236187;180236526;180238309;180238332;180238332;180238332;180238332;180238332;180239924;180239924;180239924;180239924;180239924;180239924;180239924;180241031;180241031;180241031;180241031;180241031;180241031;180241031;180242573;180242573;180242573;180242573;180242573;180242573;180242578;180242728;180246028;180246545;180247439;180247439;180247439;180247439…	180236526;180236531;180236526;180236531;180236526;180238403;180238403;180238403;180238403;180238403;180238403;180238403;180239987;180239987;180239987;180239987;180239987;180239987;180239987;180241155;180241155;180241155;180241155;180241155;180241155;180241155;180242755;180242900;180242755;180242755;180242755;180242755;180242755;180242755;180247510;180247510;180247510;180247510;180247510;180247510…	-;-;-;-;-;-;-;-;-;-;-;-;-;-;-;-;-;-;-;-;-;-;-;-;-;-;-;-;-;-;-;-;-;-;-;-;-;-;-;-;-;-;-;-;-;-;-;-;-;-;-;-;-;-;-;-;-;-;-;-;-;-;-;-;-;-;-;-;-;-;-;-;-;-;-;-;-;-;-;-;-;-;-;-;-;-;-;-;-;-;-;-;-;-;-;-;-;-;-;-;-;-;-;-;-;-;-;-;-	8955	3.65075	3.31571	3.80657	7.20215	6.98999	6.701	9.94008e-10	1.48079e-07	-1.0388
2022-03-08	10;10;10;10;10;10;10;10;10;10;10;10;10;10;10;10;10;10;10;10;10;10;10;10;10;10;10;10;10;10;10;10;10;10;10;10;10;10	45454585;45454593;45457506;45457511;45459120;45459120;45459120;45459120;45461083;45461231;45461231;45461231;45461231;45461387;45463151;45464239;45464239;45464239;45464239;45464239;45489367;45489367;45489367;45489367;45489367;45533110;45533110;45533110;45533110;45533110;45535211;45535211;45553112;45593430;45594235;45594235;45594235;45594235	45458543;45458543;45458543;45458543;45459267;45459267;45459267;45459267;45461411;45462204;45461411;45461411;45461411;45461411;45463996;45464327;45464327;45464327;45464327;45464327;45489417;45489417;45489417;45489417;45489417;45533289;45533289;45533289;45533289;45533289;45535371;45535394;45553204;45593624;45594491;45594577;45594598;45594906	-;-;-;-;-;-;-;-;-;-;-;-;-;-;-;-;-;-;-;-;-;-;-;-;-;-;-;-;-;-;-;-;-;-;-;-;-;-	7539	0.924161	0.786384	0.807817	0.330128	0.356029	0.445293	5.3355e-06	6.90429e-05	1.0713
MATK	19;19;19;19;19;19;19;19;19;19;19;19;19;19;19;19;19;19;19;19;19;19;19;19;19;19;19;19;19;19;19;19;19;19;19;19;19;19;19;19;19;19;19;19;19;19;19;19;19;19;19;19;19;19;19;19;19;19;19;19;19;19;19;19;19;19;19;19;19;19;19;19;19;19;19;19;19;19;19;19;19;19;19;19;19;19;19;19;19;19;19;19;19;19;19;19;19;19;19;19;19;19;19;19;19;19;19;19;19;19;19;19;19	3777970;3777973;3777973;3777975;3777975;3778509;3778509;3778509;3778509;3778509;3778992;3778992;3778992;3778992;3778992;3779133;3779378;3779378;3779378;3779378;3779378;3779378;3779389;3779533;3779533;3779533;3779533;3779533;3779533;3779533;3779698;3779698;3779698;3779698;3779698;3779698;3779698;3779789;3781607;3781607;3781607;3781607;3781607;3781607;3781607;3781607;3782818;3783126;3783126;3783126…	3778422;3778422;3778422;3778422;3778422;3778595;3778592;3778595;3778595;3778595;3779187;3779187;3779187;3779187;3779187;3779187;3779451;3779451;3779451;3779451;3779451;3779451;3779451;3779617;3779617;3779617;3779617;3779617;3779617;3779617;3779797;3779797;3779797;3779797;3779797;3779797;3779797;3779797;3781672;3781672;3781672;3781672;3781672;3781672;3781672;3781672;3782937;3783219;3783297;3783297…	-;-;-;-;-;-;-;-;-;-;-;-;-;-;-;-;-;-;-;-;-;-;-;-;-;-;-;-;-;-;-;-;-;-;-;-;-;-;-;-;-;-;-;-;-;-;-;-;-;-;-;-;-;-;-;-;-;-;-;-;-;-;-;-;-;-;-;-;-;-;-;-;-;-;-;-;-;-;-;-;-;-;-;-;-;-;-;-;-;-;-;-;-;-;-;-;-;-;-;-;-;-;-;-;-;-;-;-;-;-;-;-;-	4141	0.505928	0.489154	0.469804	1.23313	1.34527	0.957063	2.20274e-06	3.54114e-05	-1.3532
MBNL2	13;13;13;13;13;13;13;13;13;13;13;13;13;13;13;13;13;13;13;13;13;13;13;13;13;13;13;13;13;13;13;13;13;13;13;13;13;13;13;13;13;13;13;13;13;13	97221434;97222296;97222296;97222355;97222355;97275632;97275632;97275632;97275632;97275632;97334276;97334276;97334276;97334276;97334276;97343016;97343016;97343016;97343016;97343016;97346804;97346804;97346804;97346804;97346804;97347041;97356796;97356796;97357482;97357482;97357482;97357482;97357482;97357482;97365136;97365136;97365136;97366459;97366459;97366459;97391322;97391322;97391322;97391322;973…	97221559;97222531;97222531;97222531;97222531;97276409;97276409;97276409;97276409;97276409;97334440;97334440;97334440;97334440;97334440;97343216;97343216;97343216;97343216;97343216;97347067;97347003;97347067;97347067;97347067;97347067;97356849;97356849;97357635;97357635;97357635;97357635;97357635;97357635;97365171;97365171;97365171;97366553;97366553;97366553;97391599;97394120;97392008;97394119;973…	+;+;+;+;+;+;+;+;+;+;+;+;+;+;+;+;+;+;+;+;+;+;+;+;+;+;+;+;+;+;+;+;+;+;+;+;+;+;+;+;+;+;+;+;+;+	4908	2.51155	2.11389	2.18874	4.7912	4.67431	4.55049	4.60585e-09	4.11684e-07	-1.12471
MCM10	10;10;10;10;10;10;10;10;10;10;10;10;10;10;10;10;10;10;10;10;10;10;10;10;10;10;10;10;10;10;10;10;10;10;10;10;10;10;10;10;10;10;10;10;10;10;10;10;10;10;10;10;10;10;10;10;10;10;10;10;10;10;10;10;10;10;10;10;10;10	13161554;13161579;13161579;13164128;13164128;13164128;13170922;13170922;13170922;13170922;13172376;13172376;13172376;13172376;13172625;13172628;13172628;13175510;13175510;13175510;13180442;13180442;13180442;13182933;13182933;13182933;13186164;13186164;13186164;13188881;13188881;13188881;13191299;13191299;13191299;13192255;13192255;13192255;13192451;13192451;13192451;13192491;13195041;13195041;131…	13161606;13161606;13161606;13164209;13164209;13164209;13171263;13171263;13171263;13171263;13172480;13172474;13172480;13172480;13172765;13172765;13172765;13175681;13175681;13175681;13180607;13180607;13180607;13183100;13183100;13183100;13186280;13186280;13186280;13189080;13189080;13189080;13191399;13191399;13191399;13192365;13192365;13192365;13192568;13192568;13192568;13192568;13195580;13195269;131…	+;+;+;+;+;+;+;+;+;+;+;+;+;+;+;+;+;+;+;+;+;+;+;+;+;+;+;+;+;+;+;+;+;+;+;+;+;+;+;+;+;+;+;+;+;+;+;+;+;+;+;+;+;+;+;+;+;+;+;+;+;+;+;+;+;+;+;+;+;+	5454	4.38623	4.55638	4.53633	9.04011	8.88629	9.12171	2.61407e-10	5.09438e-08	-1.08757
MCM5	22;22;22;22;22;22;22;22;22;22;22;22;22;22;22;22;22;22;22;22;22;22;22;22;22;22;22;22;22;22;22;22;22;22;22;22;22;22;22;22;22;22;22;22;22;22;22;22;22;22;22;22;22;22;22;22;22;22;22;22;22;22;22;22;22;22;22;22;22;22;22;22;22;22	35400063;35400134;35400137;35400142;35400170;35400431;35400431;35400431;35400431;35400431;35401371;35401666;35403207;35403207;35403207;35403207;35403414;35403414;35403518;35406553;35406553;35406553;35406553;35408408;35408408;35408408;35409478;35410359;35410409;35410744;35410744;35410744;35410744;35411244;35411439;35412510;35412510;35412510;35412510;35412510;35412510;35413875;35413875;35413875;354…	35400208;35400208;35400208;35400167;35400208;35400498;35400605;35400605;35400605;35400605;35401466;35401814;35403333;35403257;35403333;35403333;35403542;35403542;35403542;35406725;35406725;35406725;35406725;35408563;35408563;35408563;35410008;35410381;35410910;35410872;35410910;35410910;35410910;35411290;35411496;35412681;35412681;35412681;35412681;35412681;35412681;35413986;35413986;35413986;354…	+;+;+;+;+;+;+;+;+;+;+;+;+;+;+;+;+;+;+;+;+;+;+;+;+;+;+;+;+;+;+;+;+;+;+;+;+;+;+;+;+;+;+;+;+;+;+;+;+;+;+;+;+;+;+;+;+;+;+;+;+;+;+;+;+;+;+;+;+;+;+;+;+;+	7338	7.37669	8.14657	8.1496	16.3913	14.1274	15.3069	8.13241e-10	1.25948e-07	-1.03577
MCM7	7;7;7;7;7;7;7;7;7;7;7;7;7;7;7;7;7;7;7;7;7;7;7;7;7;7;7;7;7;7;7;7;7;7;7;7;7;7;7;7;7;7;7;7;7;7;7;7;7;7;7;7;7;7;7;7;7;7;7;7;7;7;7;7;7;7;7;7;7;7;7;7;7;7;7;7;7;7;7;7;7;7;7;7;7;7;7;7;7;7;7;7;7;7;7;7;7;7;7;7;7;7;7;7;7;7;7;7	100092728;100092729;100092729;100092780;100092781;100092781;100093292;100093292;100093292;100093292;100093292;100093292;100093316;100094173;100094173;100094173;100094173;100094173;100094173;100094173;100095387;100095387;100095387;100095387;100095387;100095387;100095387;100095774;100095774;100095774;100095774;100095774;100095774;100097301;100097301;100097301;100097301;100097301;100097614;100097614…	100093133;100093133;100093133;100093116;100093133;100093133;100093401;100093401;100093401;100093401;100093401;100093401;100093401;100094341;100094341;100094341;100094341;100094341;100094341;100094341;100095664;100095470;100095470;100095470;100095470;100095470;100095470;100095973;100096167;100096167;100096167;100096167;100096167;100097384;100097384;100097384;100097384;100097384;100097745;100097745…	-;-;-;-;-;-;-;-;-;-;-;-;-;-;-;-;-;-;-;-;-;-;-;-;-;-;-;-;-;-;-;-;-;-;-;-;-;-;-;-;-;-;-;-;-;-;-;-;-;-;-;-;-;-;-;-;-;-;-;-;-;-;-;-;-;-;-;-;-;-;-;-;-;-;-;-;-;-;-;-;-;-;-;-;-;-;-;-;-;-;-;-;-;-;-;-;-;-;-;-;-;-;-;-;-;-;-;-	4386	34.3365	35.3582	34.5785	74.9133	68.7255	75.1265	4.83515e-11	1.5435e-08	-1.1515
MIR4453	4;4	152536264;152536428	152539263;152536516	+;+	3000	1.21805	1.02103	1.09961	0.386199	0.557078	0.481801	5.33126e-05	0.000409585	1.15142
MIR6723	1	632325	632413	-	89	15.8757	11.6573	12.8303	6.2679	4.55222	6.81052	0.00389259	0.0122462	1.09326
MIR762	16	30893903	30893985	+	83	19.3714	27.3809	43.8212	143.209	120.812	53.9287	0.00162907	0.00607146	-1.87908
MIR99AHG	21;21;21;21;21;21;21;21;21;21;21;21;21;21;21;21;21;21;21;21;21;21;21;21;21;21;21;21;21;21;21;21;21;21;21;21;21;21;21;21;21;21;21;21;21;21;21;21;21;21;21;21;21;21;21;21;21;21;21;21;21;21;21;21;21;21;21;21;21;21;21;21;21;21;21;21;21;21;21;21;21;21;21;21;21;21;21;21;21;21;21;21;21;21;21;21;21;21;21;21;21	15928296;16070522;16070522;16070533;16071114;16071114;16071114;16071114;16071114;16071233;16181591;16181591;16181591;16181591;16181591;16181591;16181591;16194379;16194395;16194565;16231056;16231056;16231056;16231056;16231056;16231056;16231056;16231056;16231056;16231079;16330604;16391614;16391614;16391614;16391614;16391614;16391614;16391614;16391614;16391614;16391614;16391614;16419328;16419402;164…	15928529;16070548;16070548;16070567;16071398;16071398;16071398;16071398;16071398;16071398;16181687;16181687;16181687;16181687;16181687;16181687;16181687;16194633;16194633;16194633;16231115;16231115;16231115;16231115;16231115;16231115;16231115;16231115;16231115;16231115;16330711;16391685;16391685;16391685;16391685;16391685;16391685;16391685;16391685;16391685;16391685;16391685;16419741;16419741;164…	+;+;+;+;+;+;+;+;+;+;+;+;+;+;+;+;+;+;+;+;+;+;+;+;+;+;+;+;+;+;+;+;+;+;+;+;+;+;+;+;+;+;+;+;+;+;+;+;+;+;+;+;+;+;+;+;+;+;+;+;+;+;+;+;+;+;+;+;+;+;+;+;+;+;+;+;+;+;+;+;+;+;+;+;+;+;+;+;+;+;+;+;+;+;+;+;+;+;+;+;+	6171	0.355289	0.464344	0.41806	0.15298	0.14772	0.0906677	2.32846e-05	0.000216025	1.56932
MLKL	16;16;16;16;16;16;16;16;16;16;16;16;16;16;16;16;16;16;16;16;16;16;16;16;16;16;16;16;16;16;16;16;16;16;16;16;16;16;16;16	74671855;74671857;74671857;74671861;74672353;74674960;74674960;74674960;74674960;74674960;74675324;74675324;74675355;74675355;74675613;74675613;74675618;74676301;74678899;74678899;74678899;74682651;74682651;74685486;74685486;74691277;74691277;74691365;74692342;74692342;74692342;74695298;74695298;74695298;74695512;74700453;74700453;74700453;74700453;74700683	74672538;74672538;74672538;74672538;74672538;74675100;74675100;74675404;74675100;74675100;74675404;74675404;74678413;74675404;74675764;74677051;74675764;74676425;74678948;74678980;74678980;74682786;74682786;74685583;74685583;74691469;74691463;74691463;74692416;74692416;74692416;74695759;74695759;74695759;74695721;74700809;74700542;74700914;74700790;74700960	-;-;-;-;-;-;-;-;-;-;-;-;-;-;-;-;-;-;-;-;-;-;-;-;-;-;-;-;-;-;-;-;-;-;-;-;-;-;-;-	5692	0.676219	0.616255	0.572124	1.06297	1.09437	1.40074	6.69776e-06	8.25582e-05	-1.01559
MRPS18A	6;6;6;6;6;6;6;6;6;6;6;6;6;6;6;6	43671303;43671510;43671784;43675202;43675202;43675494;43675494;43678518;43678518;43678518;43681089;43681089;43681089;43687668;43687668;43687668	43671906;43671906;43671906;43675617;43675271;43675617;43675617;43678625;43678625;43678625;43681120;43681120;43681120;43687791;43687791;43687791	-;-;-;-;-;-;-;-;-;-;-;-;-;-;-;-	1284	26.448	26.5492	24.6377	75.2279	67.3274	59.6985	7.81152e-11	2.1511e-08	-1.46622
MSX1	4;4;4;4	4859666;4862428;4862701;4862701	4860368;4862608;4863936;4863028	+;+;+;+	2120	0.367713	0.256345	0.139645	0.76916	0.525545	0.3299	0.0100217	0.0262843	-1.20107
MUM1L1	X;X;X;X;X;X;X;X;X;X;X;X	106168305;106168305;106171012;106171012;106177224;106201736;106203985;106203985;106203985;106205219;106205219;106205219	106168425;106168425;106171139;106171139;106177359;106201769;106204170;106204170;106204170;106208956;106208955;106208955	+;+;+;+;+;+;+;+;+;+;+;+	4343	0.415085	0.455027	0.51612	0.108685	0.116609	0.0966228	3.73056e-06	5.28563e-05	2.01626
MYADM	19;19;19;19;19;19;19;19;19;19;19;19;19;19;19;19;19;19;19;19;19;19;19;19;19	53866223;53866357;53867883;53867883;53867883;53867883;53869406;53869439;53869690;53869690;53869754;53869754;53869754;53869754;53869765;53872712;53873528;53873528;53873528;53873528;53873528;53873528;53873528;53873528;53873528	53866417;53866417;53867943;53867943;53867943;53867943;53869598;53869838;53869838;53869838;53869838;53869838;53869838;53869838;53869838;53872787;53876435;53874619;53873969;53876428;53876437;53876428;53874094;53874256;53874307	+;+;+;+;+;+;+;+;+;+;+;+;+;+;+;+;+;+;+;+;+;+;+;+;+	3675	1.04736	1.2368	1.00121	1.985	2.45294	2.7024	7.1055e-07	1.54564e-05	-1.20157
MYB-AS1	6;6	135195083;135195893	135195428;135195995	-;-	449	4.449	5.28156	6.02834	1.62469	2.25583	1.76534	5.22174e-05	0.000402952	1.40649
MYBL2	20;20;20;20;20;20;20;20;20;20;20;20;20;20;20;20;20;20;20;20;20;20;20;20;20;20;20	43667019;43667157;43673806;43673806;43681784;43682794;43682794;43686852;43686852;43692157;43692157;43699757;43699757;43702490;43702490;43705219;43705219;43709963;43709963;43711488;43711488;43713002;43713002;43715134;43715134;43715959;43715959	43667303;43667303;43673899;43673899;43681855;43682886;43682886;43687072;43687072;43692319;43692319;43700044;43700044;43702903;43702903;43705358;43705358;43710062;43710062;43711601;43711601;43713106;43713106;43715283;43715283;43716496;43716495	+;+;+;+;+;+;+;+;+;+;+;+;+;+;+;+;+;+;+;+;+;+;+;+;+;+;+	2777	48.529	51.3616	53.0752	160.395	144.307	104.3	9.31218e-08	3.5789e-06	-1.50467
MYEOV	11;11;11;11;11;11;11;11;11;11;11;11;11;11;11;11;11;11;11;11;11;11;11;11;11;11;11;11;11;11;11;11;11	69294138;69294151;69294155;69294155;69294158;69294164;69294174;69295233;69295233;69295327;69295401;69295401;69295586;69295592;69295592;69295592;69295640;69295900;69299274;69316832;69337360;69341510;69341510;69341510;69341510;69341556;69366743;69366743;69366743;69367039;69367039;69367295;69367295	69294576;69294576;69294576;69294576;69294576;69294576;69294576;69297287;69295495;69295495;69297287;69295495;69295639;69295662;69296885;69297287;69295850;69296171;69299428;69316925;69337436;69341678;69341677;69341678;69341682;69341678;69366866;69367003;69366866;69367112;69367112;69367415;69367726	+;+;+;+;+;+;+;+;+;+;+;+;+;+;+;+;+;+;+;+;+;+;+;+;+;+;+;+;+;+;+;+;+	3760	0.777479	0.591278	0.753618	2.12273	2.14157	1.88488	1.79562e-08	1.09715e-06	-1.6132
MYH3	17;17;17;17;17;17;17;17;17;17;17;17;17;17;17;17;17;17;17;17;17;17;17;17;17;17;17;17;17;17;17;17;17;17;17;17;17;17;17;17;17;17;17;17;17;17;17;17;17;17;17;17;17;17	10628526;10628527;10628532;10629597;10629597;10629597;10629842;10629842;10630092;10630288;10631611;10631813;10632476;10633591;10634017;10634840;10635367;10635735;10637809;10638043;10638873;10639044;10639298;10639560;10639996;10640333;10640563;10641085;10641285;10642240;10642417;10642826;10644351;10644584;10645707;10645929;10647182;10647363;10648557;10648635;10649577;10649577;10650374;10650374;106…	10628679;10628679;10628679;10629934;10629734;10629734;10630029;10629937;10630196;10630458;10631736;10632016;10632784;10633715;10634182;10635023;10635563;10635853;10637935;10638432;10638963;10639189;10639474;10639802;10640251;10640469;10640686;10641202;10641372;10642310;10642723;10642996;10644500;10644702;10645845;10646032;10647280;10647426;10648649;10648649;10649685;10649685;10650401;10650401;106…	-;-;-;-;-;-;-;-;-;-;-;-;-;-;-;-;-;-;-;-;-;-;-;-;-;-;-;-;-;-;-;-;-;-;-;-;-;-;-;-;-;-;-;-;-;-;-;-;-;-;-;-;-;-	6684	0.11663	0.170004	0.189823	0.0641996	0.0454609	0.0837089	0.00447503	0.0137522	1.20698
NAALADL2	3;3;3;3;3;3;3;3;3;3;3;3;3;3;3;3;3;3;3;3;3;3;3;3;3;3;3;3;3;3;3;3;3;3;3;3;3;3;3;3;3;3;3;3;3;3;3;3;3;3;3;3;3;3;3;3;3;3;3;3;3;3;3;3;3;3;3;3;3;3;3;3;3	174438573;174438573;174440945;174440978;174440983;174440987;174440987;174458514;174458514;174459241;174459241;174513509;174523413;174536621;174536621;174536621;174536621;174540728;174550569;174550569;174550569;174691973;174737641;174737641;174737641;174859280;174859322;174863816;175096790;175096790;175096790;175096790;175124406;175218076;175233931;175233931;175233931;175233931;175256411;175256411…	174438685;174438685;174441032;174441032;174441032;174441032;174441032;174458596;174458596;174459777;174459312;174513565;174523548;174536683;174536683;174536683;174536683;174540748;174550637;174550637;174551359;174692056;174737746;174737746;174737746;174859450;174859450;174864090;175097291;175097291;175097142;175097291;175124641;175218123;175234204;175234204;175234204;175234204;175256530;175256530…	+;+;+;+;+;+;+;+;+;+;+;+;+;+;+;+;+;+;+;+;+;+;+;+;+;+;+;+;+;+;+;+;+;+;+;+;+;+;+;+;+;+;+;+;+;+;+;+;+;+;+;+;+;+;+;+;+;+;+;+;+;+;+;+;+;+;+;+;+;+;+;+;+	13592	0.863891	0.959595	0.784118	0.366221	0.406131	0.384204	2.54389e-07	7.28784e-06	1.08935
NAP1L6	X	73126037	73128080	-	2044	1.28718	0.87014	1.01386	0.293911	0.322096	0.433411	6.06136e-05	0.000449345	1.50703
NAT10	11;11;11;11;11;11;11;11;11;11;11;11;11;11;11;11;11;11;11;11;11;11;11;11;11;11;11;11;11;11;11;11;11;11;11;11;11;11;11;11;11;11;11;11;11;11;11;11;11;11;11;11;11;11;11;11;11;11;11;11;11;11;11;11;11;11;11;11;11;11;11;11;11;11;11;11;11;11;11;11;11;11;11;11;11;11;11;11;11;11;11;11;11;11;11;11;11;11;11;11;11;11;11;11;11;11;11;11;11	34105602;34105617;34105617;34106029;34106039;34107053;34107053;34108209;34108211;34108211;34108211;34108211;34108742;34108742;34108742;34108742;34112052;34112052;34112052;34112052;34113716;34113716;34113716;34113716;34113803;34115823;34115823;34115823;34115823;34118180;34118180;34118180;34118180;34118396;34118396;34118396;34118396;34122459;34122459;34122459;34123762;34123762;34123762;34124302;341…	34105792;34105792;34105792;34106074;34106147;34107319;34107319;34108333;34108333;34108333;34108323;34108333;34108833;34108833;34108833;34108833;34112223;34112223;34112223;34112223;34113780;34113838;34113838;34113838;34113838;34115884;34115884;34115884;34115884;34118294;34118294;34118294;34118294;34118503;34118503;34118503;34118503;34122592;34122592;34122592;34123855;34123855;34123855;34124400;341…	+;+;+;+;+;+;+;+;+;+;+;+;+;+;+;+;+;+;+;+;+;+;+;+;+;+;+;+;+;+;+;+;+;+;+;+;+;+;+;+;+;+;+;+;+;+;+;+;+;+;+;+;+;+;+;+;+;+;+;+;+;+;+;+;+;+;+;+;+;+;+;+;+;+;+;+;+;+;+;+;+;+;+;+;+;+;+;+;+;+;+;+;+;+;+;+;+;+;+;+;+;+;+;+;+;+;+;+;+	5242	10.8096	10.0279	10.6256	17.8209	18.6363	23.1795	7.93855e-09	6.087e-07	-1.00372
NBPF13P	1;1;1;1;1;1;1;1;1;1;1;1;1;1;1;1;1;1;1;1;1;1;1;1;1;1;1;1	147019656;147021359;147021712;147022936;147024013;147024809;147031052;147041396;147042952;147044363;147044743;147048134;147055295;147055542;147056399;147099482;147101456;147109862;147110796;147113442;147114220;147115314;147116268;147117587;147118952;147120086;147121073;147124073	147019694;147021403;147021849;147023079;147024237;147024925;147031138;147041524;147043064;147044498;147044817;147048223;147055375;147055710;147056593;147099893;147101669;147110034;147110847;147113612;147114271;147115477;147116319;147117798;147119024;147120284;147121175;147124285	-;-;-;-;-;-;-;-;-;-;-;-;-;-;-;-;-;-;-;-;-;-;-;-;-;-;-;-	3873	0.679316	0.676076	0.535073	0.144034	0.0523041	0.0601935	7.3879e-07	1.57871e-05	2.73604
NBPF20	1;1;1;1;1;1;1;1;1;1;1;1;1;1;1;1;1;1;1;1;1;1;1;1;1;1;1;1;1;1;1;1;1;1;1;1;1;1;1;1;1;1;1;1;1;1;1;1;1;1;1;1;1;1;1;1;1;1;1;1;1;1;1;1;1;1;1;1;1;1;1;1;1;1;1;1;1;1;1;1;1;1;1;1;1;1;1;1;1;1;1;1;1;1;1;1;1;1;1;1;1;1;1;1;1;1;1;1;1;1;1;1;1;1;1;1;1;1;1;1;1;1;1;1;1;1;1;1;1;1;1;1;1;1;1;1;1;1;1;1;1;1;1;1;1;1;1;1;1;1;1;1;1;1;1;1;1;1;1;1;1;1;1;1;1;1;1;1;1;1;1;1;1;1;1;1;1;1;1;1;1;1;1;1;1;1;1;1;1;1;1;1;1;1;1;1;1;1;1;1…	145289900;145289900;145290620;145290639;145291500;145292381;145292381;145292381;145293204;145293204;145294021;145294021;145294782;145294782;145295567;145295567;145296338;145296338;145297139;145297139;145297139;145297962;145297962;145297962;145298787;145298787;145298787;145299548;145299548;145300329;145300329;145301100;145301100;145301901;145302724;145302817;145303533;145303533;145304294;145304294…	145291769;145291769;145291769;145291769;145291769;145292489;145292489;145292489;145293376;145293376;145294072;145294072;145294954;145294954;145295618;145295618;145296510;145296510;145297247;145297247;145297247;145298134;145298134;145298134;145298838;145298838;145298838;145299720;145299720;145300380;145300380;145301192;145301272;145302009;145302896;145302896;145303584;145303584;145304466;145304466…	-;-;-;-;-;-;-;-;-;-;-;-;-;-;-;-;-;-;-;-;-;-;-;-;-;-;-;-;-;-;-;-;-;-;-;-;-;-;-;-;-;-;-;-;-;-;-;-;-;-;-;-;-;-;-;-;-;-;-;-;-;-;-;-;-;-;-;-;-;-;-;-;-;-;-;-;-;-;-;-;-;-;-;-;-;-;-;-;-;-;-;-;-;-;-;-;-;-;-;-;-;-;-;-;-;-;-;-;-;-;-;-;-;-;-;-;-;-;-;-;-;-;-;-;-;-;-;-;-;-;-;-;-;-;-;-;-;-;-;-;-;-;-;-;-;-;-;-;-;-;-;-;-;-;-;-;-;-;-;-;-;-;-;-;-;-;-;-;-;-;-;-;-;-;-;-;-;-;-;-;-;-;-;-;-;-;-;-;-;-;-;-;-;-;-;-;-;-;-;-…	18995	0.271889	0.330318	0.347336	0.12199	0.130641	0.159552	5.22359e-06	6.81463e-05	1.12413
NCR3LG1	11;11;11;11;11;11;11;11;11;11;11	17351726;17351899;17356651;17356651;17367009;17367009;17368867;17368867;17372006;17372006;17373624	17352039;17352039;17357001;17357001;17367347;17367347;17368964;17368964;17377341;17373474;17373654	+;+;+;+;+;+;+;+;+;+;+	6438	0.302715	0.337652	0.361307	0.0933138	0.180926	0.195542	0.00186973	0.0067731	1.0249
NDRG2	14;14;14;14;14;14;14;14;14;14;14;14;14;14;14;14;14;14;14;14;14;14;14;14;14;14;14;14;14;14;14;14;14;14;14;14;14;14;14;14;14;14;14;14;14;14;14;14;14;14;14;14;14;14;14;14;14;14;14;14;14;14;14;14;14;14;14;14;14;14;14;14;14;14;14;14;14;14;14;14;14;14;14;14;14;14;14;14;14;14;14;14;14;14;14;14;14;14;14;14;14;14;14;14;14;14;14;14;14;14;14;14;14;14;14;14;14;14;14;14;14;14;14;14;14;14;14;14;14;14;14;14;14;…	21016763;21016763;21016764;21016772;21016772;21016772;21016772;21016772;21016772;21016772;21016773;21016773;21016773;21016773;21016773;21016811;21016838;21016851;21017221;21017450;21017481;21017747;21017987;21017987;21017987;21017987;21017987;21017987;21017987;21017987;21017987;21017987;21017987;21017987;21017987;21017987;21017987;21017987;21017987;21017987;21017987;21017987;21017987;21017992;210…	21017762;21017762;21017762;21017762;21017762;21017762;21017762;21017762;21017762;21016914;21017762;21017762;21017762;21017762;21017762;21017762;21017762;21017762;21017762;21017762;21017762;21017762;21018038;21018038;21018038;21018038;21018038;21018038;21018038;21018038;21018038;21018038;21018038;21018038;21018038;21018038;21018038;21018038;21018038;21018814;21018038;21018038;21018038;21018038;210…	-;-;-;-;-;-;-;-;-;-;-;-;-;-;-;-;-;-;-;-;-;-;-;-;-;-;-;-;-;-;-;-;-;-;-;-;-;-;-;-;-;-;-;-;-;-;-;-;-;-;-;-;-;-;-;-;-;-;-;-;-;-;-;-;-;-;-;-;-;-;-;-;-;-;-;-;-;-;-;-;-;-;-;-;-;-;-;-;-;-;-;-;-;-;-;-;-;-;-;-;-;-;-;-;-;-;-;-;-;-;-;-;-;-;-;-;-;-;-;-;-;-;-;-;-;-;-;-;-;-;-;-;-;-;-;-;-;-;-;-;-;-;-;-;-;-;-;-;-;-;-;-;-;-;-;-;-;-;-;-;-;-;-;-;-;-;-;-;-;-;-;-;-;-;-;-;-;-;-;-;-;-;-;-;-;-;-;-;-;-;-;-;-;-;-;-;-;-;-;-…	7550	0.361382	0.320639	0.375312	0.733182	0.617112	0.722547	6.06356e-06	7.65001e-05	-1.0526
NEAT1_2	11	65423638	65423742	+	105	32.9454	34.8185	41.0842	15.121	17.8458	17.3182	5.12773e-05	0.000398054	1.03699
NEB	2;2;2;2;2;2;2;2;2;2;2;2;2;2;2;2;2;2;2;2;2;2;2;2;2;2;2;2;2;2;2;2;2;2;2;2;2;2;2;2;2;2;2;2;2;2;2;2;2;2;2;2;2;2;2;2;2;2;2;2;2;2;2;2;2;2;2;2;2;2;2;2;2;2;2;2;2;2;2;2;2;2;2;2;2;2;2;2;2;2;2;2;2;2;2;2;2;2;2;2;2;2;2;2;2;2;2;2;2;2;2;2;2;2;2;2;2;2;2;2;2;2;2;2;2;2;2;2;2;2;2;2;2;2;2;2;2;2;2;2;2;2;2;2;2;2;2;2;2;2;2;2;2;2;2;2;2;2;2;2;2;2;2;2;2;2;2;2;2;2;2;2;2;2;2;2;2;2;2;2;2;2;2;2;2;2;2;2;2;2;2;2;2;2;2;2;2;2;2;2…	151485336;151485339;151485339;151485339;151485339;151485339;151485341;151485760;151485760;151485760;151489971;151489971;151489971;151489971;151489971;151489971;151489971;151489971;151489971;151489971;151490372;151490372;151490372;151490372;151490372;151490372;151490372;151490372;151490372;151490372;151491207;151491683;151491683;151491683;151491683;151491683;151491683;151491683;151491683;151491683…	151485933;151485933;151485933;151485933;151485933;151485933;151485933;151485933;151485933;151485933;151490077;151490077;151490077;151490077;151490077;151490077;151490077;151490077;151490077;151490077;151490518;151490518;151490518;151490518;151490518;151490518;151490518;151490518;151490518;151490518;151492281;151491775;151491775;151491775;151491775;151491775;151491775;151491775;151491775;151491775…	-;-;-;-;-;-;-;-;-;-;-;-;-;-;-;-;-;-;-;-;-;-;-;-;-;-;-;-;-;-;-;-;-;-;-;-;-;-;-;-;-;-;-;-;-;-;-;-;-;-;-;-;-;-;-;-;-;-;-;-;-;-;-;-;-;-;-;-;-;-;-;-;-;-;-;-;-;-;-;-;-;-;-;-;-;-;-;-;-;-;-;-;-;-;-;-;-;-;-;-;-;-;-;-;-;-;-;-;-;-;-;-;-;-;-;-;-;-;-;-;-;-;-;-;-;-;-;-;-;-;-;-;-;-;-;-;-;-;-;-;-;-;-;-;-;-;-;-;-;-;-;-;-;-;-;-;-;-;-;-;-;-;-;-;-;-;-;-;-;-;-;-;-;-;-;-;-;-;-;-;-;-;-;-;-;-;-;-;-;-;-;-;-;-;-;-;-;-;-;-…	30567	0.0462243	0.0258604	0.0553441	0.0126345	0.0132544	0.0137283	0.000549314	0.00252123	1.60348
NELL2	12;12;12;12;12;12;12;12;12;12;12;12;12;12;12;12;12;12;12;12;12;12;12;12;12;12;12;12;12;12;12;12;12;12;12;12;12;12;12;12;12;12;12;12;12;12;12;12;12;12;12;12;12;12;12;12;12;12;12;12;12;12;12;12;12;12;12;12;12;12;12;12;12;12;12;12;12;12;12;12;12;12;12;12;12;12;12;12;12;12;12;12;12;12;12;12;12;12;12;12;12;12;12;12;12;12;12;12;12;12;12;12;12;12;12;12;12;12;12;12;12;12;12;12;12;12;12;12;12;12;12;12;12;…	44508275;44508278;44508282;44508282;44508535;44508603;44508628;44520005;44520005;44520005;44520005;44520005;44520005;44520005;44521962;44522000;44522000;44522000;44522000;44522000;44522000;44522000;44522777;44523291;44523291;44523291;44523291;44523291;44523291;44523291;44523291;44532515;44532581;44532581;44532581;44532581;44532581;44532581;44532581;44607169;44607169;44607169;44607169;44607169;446…	44508984;44508984;44508984;44508984;44508984;44508984;44508984;44520229;44520229;44520229;44520229;44520229;44520229;44520229;44522176;44522176;44522176;44522176;44522176;44522176;44522176;44522176;44523484;44523635;44523484;44523484;44523484;44523484;44523484;44523484;44523484;44532721;44532621;44532721;44532721;44532721;44532721;44532721;44532721;44607264;44607264;44607264;44607264;44607264;446…	-;-;-;-;-;-;-;-;-;-;-;-;-;-;-;-;-;-;-;-;-;-;-;-;-;-;-;-;-;-;-;-;-;-;-;-;-;-;-;-;-;-;-;-;-;-;-;-;-;-;-;-;-;-;-;-;-;-;-;-;-;-;-;-;-;-;-;-;-;-;-;-;-;-;-;-;-;-;-;-;-;-;-;-;-;-;-;-;-;-;-;-;-;-;-;-;-;-;-;-;-;-;-;-;-;-;-;-;-;-;-;-;-;-;-;-;-;-;-;-;-;-;-;-;-;-;-;-;-;-;-;-;-;-;-;-;-;-;-;-;-;-;-;-;-;-;-;-;-;-;-;-;-;-;-;-;-;-;-;-;-;-;-;-;-;-;-;-;-;-;-;-;-;-;-;-;-;-;-;-;-;-;-;-;-;-;-;-;-;-;-;-;-;-;-;-;-;-;-;-…	6424	0.189609	0.192266	0.177755	0.0267192	0.0551844	0.0362904	4.05469e-05	0.00032913	2.15849
NETO2	16;16;16;16;16;16;16;16;16;16;16;16;16;16;16;16;16;16;16;16;16;16;16;16;16;16;16;16;16	47077703;47081634;47082990;47083107;47083614;47086226;47086226;47109483;47109483;47109483;47109483;47109531;47122657;47122657;47122657;47122657;47122868;47122868;47122889;47122889;47128325;47128325;47128325;47129224;47129224;47131969;47131969;47143579;47143579	47083801;47083801;47083801;47083801;47083801;47086339;47086339;47109711;47109711;47109711;47109711;47109634;47122784;47122784;47122784;47122784;47122903;47122912;47122912;47122912;47128458;47128573;47128573;47129364;47129364;47132025;47132025;47143709;47143997	-;-;-;-;-;-;-;-;-;-;-;-;-;-;-;-;-;-;-;-;-;-;-;-;-;-;-;-;-	7481	0.54056	0.422657	0.401387	1.07837	1.0019	1.07823	1.80715e-07	5.76886e-06	-1.298
NEXN	1;1;1;1;1;1;1;1;1;1;1;1;1;1;1;1;1;1;1;1;1;1;1;1;1;1;1;1;1;1;1;1;1;1;1;1;1;1;1;1;1;1;1;1;1;1;1;1;1;1;1;1;1;1;1;1;1;1;1;1;1;1;1;1;1	77888513;77888515;77888628;77888662;77916055;77916055;77916055;77916055;77917566;77917566;77917960;77917960;77917960;77917960;77918125;77918125;77918125;77918125;77918128;77925188;77925188;77925188;77925188;77926414;77926414;77926414;77926414;77926414;77926569;77926716;77926716;77926716;77926716;77926716;77929316;77929316;77929316;77929316;77929316;77929316;77931662;77933048;77933282;77933282;779…	77888759;77888759;77888759;77888759;77916133;77916133;77916133;77916133;77917757;77917757;77918038;77918038;77918038;77918038;77918273;77918273;77918273;77918273;77918273;77925229;77925229;77925229;77925229;77926611;77926611;77926611;77926611;77926611;77926892;77926892;77926892;77926892;77926892;77926892;77929504;77929504;77929504;77929504;77929504;77929504;77932054;77933479;77933479;77933479;779…	+;+;+;+;+;+;+;+;+;+;+;+;+;+;+;+;+;+;+;+;+;+;+;+;+;+;+;+;+;+;+;+;+;+;+;+;+;+;+;+;+;+;+;+;+;+;+;+;+;+;+;+;+;+;+;+;+;+;+;+;+;+;+;+;+	4436	0.49425	0.567997	0.695978	0.183794	0.0684988	0.13664	5.13645e-06	6.72901e-05	2.06071
NFATC4	14;14;14;14;14;14;14;14;14;14;14;14;14;14;14;14;14;14;14;14;14;14;14;14;14;14;14;14;14;14;14;14;14;14;14;14;14;14;14;14;14;14;14;14;14;14;14;14;14;14;14;14;14;14;14;14;14;14;14;14;14;14;14;14;14;14;14;14;14;14;14;14;14;14;14;14;14;14;14;14;14;14;14;14;14;14;14;14;14;14;14;14;14;14;14;14;14;14;14;14;14;14;14;14;14;14;14;14;14;14;14;14;14;14;14;14;14;14;14;14;14;14;14;14;14;14;14;14;14;14;14;14;14;…	24365673;24366911;24366939;24367090;24367260;24367260;24367260;24367260;24367364;24367468;24367502;24368020;24368048;24368070;24368186;24368186;24368200;24368312;24368312;24368312;24368312;24368312;24368312;24368312;24368312;24368312;24368312;24368312;24368341;24368999;24369082;24369153;24369153;24369153;24369153;24369153;24369167;24369245;24369499;24369499;24369499;24369499;24369499;24369499;243…	24365718;24367214;24367214;24367214;24367351;24367351;24367351;24367351;24367653;24367653;24367653;24368440;24368440;24368169;24368440;24368440;24368440;24368440;24368440;24368440;24368440;24368440;24368440;24368440;24368440;24368440;24368440;24368440;24368440;24369343;24369156;24369376;24370594;24369376;24370594;24370594;24369376;24369343;24370594;24370594;24370594;24370594;24370057;24370594;243…	+;+;+;+;+;+;+;+;+;+;+;+;+;+;+;+;+;+;+;+;+;+;+;+;+;+;+;+;+;+;+;+;+;+;+;+;+;+;+;+;+;+;+;+;+;+;+;+;+;+;+;+;+;+;+;+;+;+;+;+;+;+;+;+;+;+;+;+;+;+;+;+;+;+;+;+;+;+;+;+;+;+;+;+;+;+;+;+;+;+;+;+;+;+;+;+;+;+;+;+;+;+;+;+;+;+;+;+;+;+;+;+;+;+;+;+;+;+;+;+;+;+;+;+;+;+;+;+;+;+;+;+;+;+;+;+;+;+;+;+;+;+;+;+;+;+;+;+;+;+;+;+;+;+;+;+;+;+;+;+;+;+;+;+;+;+;+;+;+;+;+;+;+;+;+;+;+;+;+;+;+;+;+;+;+;+;+;+;+;+;+;+;+;+;+;+;+;+;+;+…	8437	0.132821	0.140537	0.185472	0.0762908	0.0420178	0.0828954	0.004485	0.0137721	1.0924
NMD3	3;3;3;3;3;3;3;3;3;3;3;3;3;3;3;3;3;3;3;3;3;3;3;3;3;3;3;3;3;3;3;3;3;3;3;3;3;3;3;3;3;3;3;3;3;3;3;3;3;3;3;3;3;3;3;3;3;3;3;3;3;3;3;3;3;3;3;3;3;3;3;3;3;3;3;3;3;3;3;3;3;3;3;3;3;3;3;3;3;3;3;3;3	161104696;161104822;161156971;161221262;161221288;161221290;161221308;161221324;161221557;161221559;161221994;161221994;161221994;161221994;161221994;161221994;161221994;161221994;161224930;161224930;161224930;161224930;161224930;161224930;161224930;161224930;161224930;161224930;161227247;161227247;161227247;161227247;161227247;161227247;161227247;161227247;161227247;161227247;161233399;161233399…	161104885;161104881;161157055;161221331;161221331;161221409;161221409;161221724;161221735;161222057;161222057;161222057;161222057;161222057;161222057;161222057;161222057;161222057;161225018;161225064;161225064;161225064;161225064;161225064;161225064;161225064;161225064;161225064;161227343;161227343;161227343;161227343;161227343;161227343;161227343;161227343;161227343;161227343;161233479;161233479…	+;+;+;+;+;+;+;+;+;+;+;+;+;+;+;+;+;+;+;+;+;+;+;+;+;+;+;+;+;+;+;+;+;+;+;+;+;+;+;+;+;+;+;+;+;+;+;+;+;+;+;+;+;+;+;+;+;+;+;+;+;+;+;+;+;+;+;+;+;+;+;+;+;+;+;+;+;+;+;+;+;+;+;+;+;+;+;+;+;+;+;+;+	4869	57.6179	58.0496	57.4238	121.55	117.544	115.363	1.03047e-10	2.47978e-08	-1.11731
NME1	17;17;17;17;17;17;17;17;17;17;17;17;17;17;17;17;17;17;17;17;17;17;17;17;17;17;17;17;17;17;17;17;17;17;17;17;17;17;17;17;17	51153536;51153572;51153576;51153578;51153580;51153581;51153597;51153665;51154044;51154225;51154225;51154225;51154225;51154337;51155651;51155651;51155651;51155651;51155651;51155651;51155651;51155651;51155651;51155651;51159980;51159980;51159980;51159980;51159980;51159980;51159980;51161098;51161098;51161160;51161160;51161160;51161160;51161728;51161728;51161728;51161728	51153662;51153662;51153662;51153662;51153662;51153662;51153662;51153724;51154444;51154444;51154444;51154444;51154444;51154444;51155780;51155759;51156063;51155780;51155780;51155780;51155780;51156546;51155780;51155780;51160081;51160081;51160081;51160081;51160602;51160081;51160081;51162428;51161272;51161272;51161586;51161272;51161272;51161898;51162035;51162195;51162061	+;+;+;+;+;+;+;+;+;+;+;+;+;+;+;+;+;+;+;+;+;+;+;+;+;+;+;+;+;+;+;+;+;+;+;+;+;+;+;+;+	3438	48.4244	49.692	43.8795	96.4936	97.4717	74.4549	1.26839e-07	4.53167e-06	-1.00338
NME9	3;3;3;3;3;3;3;3;3;3;3;3;3;3;3;3;3;3;3;3;3;3;3;3;3;3;3;3;3;3;3;3;3;3;3;3;3;3;3;3;3;3;3;3;3;3;3;3;3;3;3;3;3;3;3;3;3;3;3;3;3;3;3;3;3;3;3;3;3;3;3;3;3;3;3;3;3;3;3;3	138261437;138261437;138262091;138262540;138301380;138303271;138303507;138303507;138303507;138303507;138303507;138304873;138304873;138304873;138304873;138305976;138306004;138306004;138306004;138306004;138306004;138306004;138306034;138306398;138306398;138306398;138306398;138306398;138306398;138306398;138306398;138314332;138314332;138314332;138314332;138314332;138314332;138314332;138314332;138315527…	138262586;138262586;138262586;138262586;138301704;138303643;138303643;138303643;138303643;138303643;138303643;138305027;138305027;138305027;138305027;138306096;138306096;138306096;138306096;138306096;138306096;138306096;138306096;138306480;138306480;138306480;138306480;138306480;138306480;138306480;138306480;138314407;138314407;138314407;138314407;138314407;138314407;138314407;138314407;138315643…	-;-;-;-;-;-;-;-;-;-;-;-;-;-;-;-;-;-;-;-;-;-;-;-;-;-;-;-;-;-;-;-;-;-;-;-;-;-;-;-;-;-;-;-;-;-;-;-;-;-;-;-;-;-;-;-;-;-;-;-;-;-;-;-;-;-;-;-;-;-;-;-;-;-;-;-;-;-;-;-	3738	0.377993	0.343638	0.452569	0.0918374	0.216772	0.224523	0.00523997	0.0156988	1.0781
NMNAT3	3;3;3;3;3;3;3;3;3;3;3;3;3;3;3;3;3;3;3;3;3;3;3;3;3;3;3;3;3;3;3;3;3;3;3;3;3;3;3;3;3;3;3;3;3;3;3;3;3;3;3;3;3;3;3;3;3;3;3;3;3;3	139560180;139560191;139560192;139560582;139560842;139561087;139561151;139561333;139572107;139573598;139573598;139573598;139573598;139573598;139573633;139575583;139575583;139578872;139578872;139578872;139578872;139578872;139578872;139578872;139582927;139599148;139627616;139627616;139627616;139627616;139627616;139627616;139634360;139634360;139634360;139634360;139634611;139637963;139637963;139637963…	139561392;139561392;139561392;139561392;139561392;139561392;139561392;139561392;139572233;139573680;139573680;139573680;139573680;139573680;139573680;139575648;139575994;139579055;139579055;139579055;139579055;139579055;139579055;139579055;139583077;139599468;139627761;139627764;139627764;139627764;139627764;139627764;139634647;139634587;139634584;139634584;139634647;139638062;139638062;139638062…	-;-;-;-;-;-;-;-;-;-;-;-;-;-;-;-;-;-;-;-;-;-;-;-;-;-;-;-;-;-;-;-;-;-;-;-;-;-;-;-;-;-;-;-;-;-;-;-;-;-;-;-;-;-;-;-;-;-;-;-;-;-	3451	0.409429	0.400849	0.428931	0.211384	0.2348	0.108087	0.00399682	0.0125168	1.07483
NOS3	7;7;7;7;7;7;7;7;7;7;7;7;7;7;7;7;7;7;7;7;7;7;7;7;7;7;7;7;7;7;7;7;7;7;7;7;7;7;7;7;7;7;7;7;7;7;7;7;7;7;7;7;7;7;7;7;7;7;7;7;7;7;7;7;7;7;7;7;7;7;7;7;7;7;7;7;7;7;7;7;7;7;7;7;7;7;7;7;7;7;7;7;7;7;7;7;7;7;7;7;7;7;7	150990995;150991104;150993753;150993804;150993804;150995203;150995203;150995203;150995203;150996404;150996404;150996404;150996763;150996763;150996763;150998357;150998357;150998357;150998357;150998539;150998539;150998539;150998539;150998946;150998946;150998946;150998946;150999190;150999190;150999190;150999190;151000498;151000498;151000498;151000498;151001231;151001231;151001231;151001231;151001544…	150991300;150991300;150993961;150993961;150993961;150995314;150995314;150995314;150995314;150996552;150996552;150996552;150996925;150996925;150996925;150998448;150998448;150998448;150998448;150998680;150998680;150998680;150998680;150999085;150999085;150999085;150999085;150999364;150999364;150999364;150999364;151000599;151000599;151000599;151000599;151001425;151001425;151001425;151001425;151001617…	+;+;+;+;+;+;+;+;+;+;+;+;+;+;+;+;+;+;+;+;+;+;+;+;+;+;+;+;+;+;+;+;+;+;+;+;+;+;+;+;+;+;+;+;+;+;+;+;+;+;+;+;+;+;+;+;+;+;+;+;+;+;+;+;+;+;+;+;+;+;+;+;+;+;+;+;+;+;+;+;+;+;+;+;+;+;+;+;+;+;+;+;+;+;+;+;+;+;+;+;+;+;+	5953	0.941212	1.06229	1.10829	0.245082	0.204173	0.321126	1.98555e-08	1.18091e-06	1.9253
NOV	8;8;8;8;8;8;8	119416306;119416450;119416744;119416744;119418058;119419131;119422836	119416616;119416616;119417120;119416969;119418309;119419345;119424353	+;+;+;+;+;+;+	2673	0.401004	0.59145	0.648708	0.0802675	0.170517	0.313979	0.00182294	0.00664999	1.47012
NPAS2	2;2;2;2;2;2;2;2;2;2;2;2;2;2;2;2;2;2;2;2;2;2;2;2;2;2;2;2;2;2;2;2;2;2;2;2;2;2;2;2;2;2;2;2;2;2;2;2;2;2;2;2;2;2;2;2;2;2;2;2;2;2;2;2;2;2;2;2;2;2;2;2;2;2;2;2;2;2;2;2;2	100820152;100821025;100904733;100904733;100925146;100925146;100925146;100925146;100925162;100932910;100932910;100932910;100932910;100932910;100934111;100937753;100937753;100937753;100937753;100937753;100937753;100948235;100948235;100948235;100948235;100948235;100949367;100949367;100949367;100949367;100962755;100964058;100964058;100964058;100964861;100964861;100965660;100968281;100968281;100970601…	100820414;100821199;100904786;100904786;100925294;100925294;100925294;100925294;100925300;100933001;100933001;100933001;100933001;100933001;100934160;100937842;100937842;100937842;100937842;100937842;100937842;100948355;100948355;100948355;100948299;100948355;100949480;100949480;100949480;100949480;100962833;100964176;100964176;100964176;100964918;100964943;100965766;100968428;100968428;100971074…	+;+;+;+;+;+;+;+;+;+;+;+;+;+;+;+;+;+;+;+;+;+;+;+;+;+;+;+;+;+;+;+;+;+;+;+;+;+;+;+;+;+;+;+;+;+;+;+;+;+;+;+;+;+;+;+;+;+;+;+;+;+;+;+;+;+;+;+;+;+;+;+;+;+;+;+;+;+;+;+;+	12491	0.27304	0.229402	0.362285	0.590881	0.539235	0.563646	8.16502e-06	9.66092e-05	-1.04348
NPNT	4;4;4;4;4;4;4;4;4;4;4;4;4;4;4;4;4;4;4;4;4;4;4;4;4;4;4;4;4;4;4;4;4;4;4;4;4;4;4;4;4;4;4;4;4;4;4;4;4;4;4;4;4;4;4;4;4;4;4;4;4;4;4;4;4;4;4;4;4;4;4;4;4;4;4;4;4;4;4;4;4;4;4;4;4;4;4;4;4;4;4;4;4;4;4;4;4;4;4;4;4;4;4;4;4;4;4;4;4;4;4;4;4;4;4;4;4;4;4;4;4;4;4;4;4;4;4	105894775;105895437;105895440;105895441;105895441;105895451;105895493;105895653;105897901;105897901;105897901;105897901;105897901;105897901;105897901;105897901;105897901;105898102;105902694;105911637;105911863;105912065;105912148;105912176;105912188;105912188;105912543;105927336;105927336;105927336;105927336;105927336;105927336;105927336;105927336;105927336;105927336;105927336;105927336;105927336…	105894892;105895723;105895723;105895723;105895723;105895723;105895723;105895723;105898001;105898001;105898001;105898001;105898001;105898001;105898001;105898001;105898001;105898136;105902795;105911732;105912238;105912238;105912238;105912238;105912238;105912238;105912651;105927578;105927428;105927428;105927428;105927428;105927428;105927428;105927428;105927428;105927428;105927428;105927428;105927428…	+;+;+;+;+;+;+;+;+;+;+;+;+;+;+;+;+;+;+;+;+;+;+;+;+;+;+;+;+;+;+;+;+;+;+;+;+;+;+;+;+;+;+;+;+;+;+;+;+;+;+;+;+;+;+;+;+;+;+;+;+;+;+;+;+;+;+;+;+;+;+;+;+;+;+;+;+;+;+;+;+;+;+;+;+;+;+;+;+;+;+;+;+;+;+;+;+;+;+;+;+;+;+;+;+;+;+;+;+;+;+;+;+;+;+;+;+;+;+;+;+;+;+;+;+;+;+	6117	10.4979	8.55312	10.7097	3.2199	3.54347	4.61914	2.11971e-08	1.25593e-06	1.30581
NPR3	5;5;5;5;5;5;5;5;5;5;5;5;5;5;5;5;5;5;5;5;5;5;5;5;5;5;5;5;5;5;5;5;5;5;5;5;5;5;5;5;5;5;5;5;5;5	32689070;32709407;32710637;32710654;32711434;32711723;32712331;32716384;32724698;32724698;32724698;32724698;32724698;32724698;32738864;32738864;32738864;32738864;32738864;32738864;32774708;32774708;32774708;32774708;32774708;32774708;32780722;32780722;32780722;32780722;32780722;32780722;32782893;32782893;32782893;32782893;32782893;32782893;32784796;32784796;32784799;32784799;32786234;32786234;327…	32689186;32710783;32710783;32710783;32712545;32712545;32712545;32716828;32724820;32724820;32724820;32724820;32724820;32724820;32739030;32739030;32739030;32739030;32739030;32739030;32774843;32774843;32774843;32774843;32774843;32774843;32780816;32780816;32780816;32780816;32780816;32780816;32783028;32783028;32783607;32783028;32783028;32783028;32784883;32784883;32784883;32784883;32786421;32791720;327…	+;+;+;+;+;+;+;+;+;+;+;+;+;+;+;+;+;+;+;+;+;+;+;+;+;+;+;+;+;+;+;+;+;+;+;+;+;+;+;+;+;+;+;+;+;+	9866	0.177782	0.20531	0.192902	0.0956864	0.076997	0.0803405	0.000621377	0.00278658	1.09196
NPY1R	4;4;4;4;4;4;4;4;4;4;4;4;4;4;4;4;4;4;4;4;4;4	163323961;163324974;163325536;163325626;163325856;163325856;163325856;163325856;163326218;163326370;163326374;163326481;163326665;163326665;163326665;163330700;163332482;163332482;163332482;163332482;163332796;163344305	163325758;163325758;163325758;163325758;163326134;163326705;163325931;163325931;163326298;163326705;163326705;163326705;163326705;163326705;163326705;163331166;163332596;163332596;163332596;163332862;163333018;163344832	-;-;-;-;-;-;-;-;-;-;-;-;-;-;-;-;-;-;-;-;-;-	4180	2.21464	2.82481	2.45864	1.02658	0.969253	0.758507	1.58119e-07	5.20693e-06	1.35799
NRARP	9	137300482	137302251	-	1770	0.770744	0.753629	0.525671	2.03645	1.40199	1.60688	2.75141e-05	0.000245979	-1.39703
NRK	X;X;X;X;X;X;X;X;X;X;X;X;X;X;X;X;X;X;X;X;X;X;X;X;X;X;X;X;X;X;X;X;X;X;X;X;X;X;X;X;X;X;X;X;X;X;X;X;X;X;X;X;X;X;X;X;X;X;X;X;X;X;X	105822543;105822553;105822581;105831054;105831054;105831054;105880199;105880199;105880199;105881708;105881708;105881708;105888294;105888294;105888294;105893832;105893832;105893832;105895238;105895433;105895433;105898584;105898584;105900618;105900618;105905265;105905265;105906414;105906414;105907177;105908240;105908727;105908727;105912648;105912648;105915730;105915730;105917578;105917578;105921964…	105822902;105822902;105822902;105831119;105831119;105831119;105880255;105880255;105880255;105881779;105881779;105881779;105888419;105888419;105888419;105893942;105893942;105893942;105895363;105895523;105895523;105898714;105898714;105900672;105900672;105905343;105905343;105906589;105906589;105908303;105908303;105909882;105909882;105912755;105912755;105915797;105915797;105917672;105917672;105922061…	+;+;+;+;+;+;+;+;+;+;+;+;+;+;+;+;+;+;+;+;+;+;+;+;+;+;+;+;+;+;+;+;+;+;+;+;+;+;+;+;+;+;+;+;+;+;+;+;+;+;+;+;+;+;+;+;+;+;+;+;+;+;+	9573	2.331	2.12626	2.89373	0.479628	0.608378	0.628302	1.59977e-10	3.47551e-08	2.02213
NRP2	2;2;2;2;2;2;2;2;2;2;2;2;2;2;2;2;2;2;2;2;2;2;2;2;2;2;2;2;2;2;2;2;2;2;2;2;2;2;2;2;2;2;2;2;2;2;2;2;2;2;2;2;2;2;2;2;2;2;2;2;2;2;2;2;2;2;2;2;2;2;2;2;2;2;2;2;2;2;2;2;2;2;2;2;2;2;2;2;2;2;2;2;2;2;2;2;2;2;2;2;2;2;2;2;2;2;2;2;2;2;2;2;2;2;2;2;2;2;2;2;2;2;2;2;2;2	205681990;205682500;205682501;205682507;205682658;205683091;205683091;205683091;205683260;205683260;205683291;205683291;205685793;205697544;205697544;205697544;205697544;205697544;205697544;205697544;205697544;205697544;205697544;205700707;205716193;205716193;205716193;205716193;205716193;205716193;205716193;205722265;205722478;205722478;205722478;205722478;205722478;205722478;205723785;205723785…	205682218;205683363;205682578;205682905;205683363;205683363;205683363;205683363;205683363;205683363;205683363;205683363;205685822;205697734;205697721;205697721;205697721;205697909;205697721;205697721;205697721;205697721;205697721;205701557;205716374;205716374;205716374;205716374;205716246;205716374;205716374;205722708;205722708;205722708;205722708;205722708;205722708;205722708;205723922;205723940…	+;+;+;+;+;+;+;+;+;+;+;+;+;+;+;+;+;+;+;+;+;+;+;+;+;+;+;+;+;+;+;+;+;+;+;+;+;+;+;+;+;+;+;+;+;+;+;+;+;+;+;+;+;+;+;+;+;+;+;+;+;+;+;+;+;+;+;+;+;+;+;+;+;+;+;+;+;+;+;+;+;+;+;+;+;+;+;+;+;+;+;+;+;+;+;+;+;+;+;+;+;+;+;+;+;+;+;+;+;+;+;+;+;+;+;+;+;+;+;+;+;+;+;+;+;+	13896	0.0666176	0.0426637	0.0730442	0.101904	0.109334	0.154346	0.00215145	0.00757609	-1.06813
NTN1	17;17;17;17;17;17;17;17;17;17;17	9021542;9022311;9162813;9162935;9179807;9179807;9182916;9182916;9183248;9221168;9239640	9021585;9023391;9163001;9163001;9179956;9179956;9182969;9182969;9183676;9221242;9244000	+;+;+;+;+;+;+;+;+;+;+	6383	0.587748	0.557282	0.556569	0.255463	0.198353	0.328711	0.000120696	0.000764963	1.03003
NUAK2	1;1;1;1;1;1;1	205302059;205305199;205306188;205308165;205308581;205311705;205321398	205304513;205305331;205306307;205308230;205308732;205311825;205321791	-;-;-;-;-;-;-	3441	0.736282	0.674808	0.970972	0.286822	0.264918	0.325202	3.61914e-05	0.000303542	1.35915
NUTM2A	10;10;10;10;10;10;10;10;10;10;10;10;10;10	87225448;87225500;87228263;87228263;87230920;87230920;87232021;87232021;87232603;87232603;87233473;87233473;87233923;87235117	87226212;87226212;87228962;87228962;87231048;87231048;87232160;87232160;87232985;87232985;87233589;87233589;87234978;87236908	+;+;+;+;+;+;+;+;+;+;+;+;+;+	5082	0.393074	0.427745	0.399458	0.101325	0.169409	0.256892	0.00141115	0.0053995	1.1339
NVL	1;1;1;1;1;1;1;1;1;1;1;1;1;1;1;1;1;1;1;1;1;1;1;1;1;1;1;1;1;1;1;1;1;1;1;1;1;1;1;1;1;1;1;1;1;1;1;1;1;1;1;1;1;1;1;1;1;1;1;1;1;1;1;1;1;1;1;1;1;1;1;1;1;1;1;1;1;1;1;1;1;1;1;1;1;1;1;1;1;1;1;1;1;1;1;1;1;1;1;1;1;1;1;1;1;1;1;1;1;1;1;1;1;1;1;1;1;1;1;1;1;1;1;1;1;1;1;1;1;1;1;1;1;1;1;1;1;1;1;1;1;1;1;1;1;1;1;1;1;1;1;1;1;1;1;1;1;1;1;1;1;1;1;1;1;1;1;1;1;1;1;1;1;1;1;1;1;1;1;1;1;1;1;1;1;1;1;1;1;1;1;1;1;1;1;1;1;1;1;1…	224227334;224227334;224227334;224227334;224227334;224227334;224227334;224227337;224227369;224227454;224231226;224231226;224231226;224231226;224231226;224231226;224231226;224231226;224231226;224231226;224231266;224232089;224232895;224233201;224233201;224233201;224233201;224233201;224233201;224233201;224233201;224233201;224233201;224236506;224236506;224236506;224236506;224236506;224236506;224236506…	224227670;224227670;224227670;224227670;224227670;224227670;224227670;224227670;224227670;224227670;224231296;224231296;224231296;224231296;224231296;224231296;224231296;224231296;224231296;224231296;224231296;224232182;224232972;224233289;224233289;224233289;224233289;224233289;224233289;224233289;224233289;224233289;224233289;224236582;224236582;224236582;224236582;224236582;224236582;224236582…	-;-;-;-;-;-;-;-;-;-;-;-;-;-;-;-;-;-;-;-;-;-;-;-;-;-;-;-;-;-;-;-;-;-;-;-;-;-;-;-;-;-;-;-;-;-;-;-;-;-;-;-;-;-;-;-;-;-;-;-;-;-;-;-;-;-;-;-;-;-;-;-;-;-;-;-;-;-;-;-;-;-;-;-;-;-;-;-;-;-;-;-;-;-;-;-;-;-;-;-;-;-;-;-;-;-;-;-;-;-;-;-;-;-;-;-;-;-;-;-;-;-;-;-;-;-;-;-;-;-;-;-;-;-;-;-;-;-;-;-;-;-;-;-;-;-;-;-;-;-;-;-;-;-;-;-;-;-;-;-;-;-;-;-;-;-;-;-;-;-;-;-;-;-;-;-;-;-;-;-;-;-;-;-;-;-;-;-;-;-;-;-;-;-;-;-;-;-;-;-…	4813	3.38108	3.75692	3.44457	8.1489	8.95441	8.16655	1.15716e-10	2.70154e-08	-1.33877
NXNL2	9;9;9;9;9;9;9;9;9;9;9;9	88535101;88535101;88535105;88535105;88535186;88538388;88539714;88544379;88544379;88571087;88575087;88583999	88535736;88535736;88535736;88535736;88535736;88538392;88539811;88544980;88544547;88571208;88575789;88584274	+;+;+;+;+;+;+;+;+;+;+;+	2442	5.78599	5.86705	5.21297	2.09108	2.05311	2.0048	4.09925e-09	3.86268e-07	1.36993
NYNRIN	14;14;14;14;14;14;14;14;14;14;14;14;14	24398786;24399230;24407869;24408652;24411076;24411354;24412594;24412997;24412997;24413316;24413316;24414596;24414596	24399086;24399444;24408527;24410208;24411206;24411450;24412691;24413098;24413098;24413417;24413417;24419288;24414718	+;+;+;+;+;+;+;+;+;+;+;+;+	7955	2.54788	2.79473	2.94533	0.496268	0.375608	0.685761	1.2552e-10	2.84548e-08	2.32389
P2RY6	11;11;11;11;11;11;11;11;11;11;11;11;11;11;11;11;11;11;11;11;11;11;11;11;11;11;11;11;11;11;11;11;11;11;11;11;11	73264505;73264510;73264517;73264539;73265230;73265236;73269894;73271522;73272202;73272307;73272307;73272307;73272340;73272420;73289407;73292782;73295730;73295730;73295730;73295730;73295730;73295730;73295730;73295730;73296485;73296485;73296485;73296485;73296485;73296485;73296485;73296485;73296485;73296485;73296485;73296485;73297024	73264649;73264649;73264649;73264649;73265465;73265465;73270155;73272466;73272466;73272466;73272466;73272466;73272466;73272466;73289436;73292920;73295815;73295815;73295815;73295815;73295815;73295815;73295815;73295815;73297770;73297804;73296540;73298617;73297254;73298599;73297805;73297802;73296903;73297805;73297790;73297805;73297169	+;+;+;+;+;+;+;+;+;+;+;+;+;+;+;+;+;+;+;+;+;+;+;+;+;+;+;+;+;+;+;+;+;+;+;+;+	3976	0.649464	0.546731	0.542486	0.118718	0.28022	0.281444	0.000450163	0.00215533	1.28491
PADI4	1;1;1;1;1;1;1;1;1;1;1;1;1;1;1;1;1;1;1;1;1;1;1;1;1;1;1;1;1;1;1	17308195;17308197;17330969;17330969;17333943;17333943;17334324;17336159;17338038;17339688;17341943;17342299;17346028;17346034;17347927;17347941;17347941;17348730;17354533;17354533;17354533;17355983;17355983;17355983;17356357;17356357;17356357;17358838;17358838;17359280;17363522	17308314;17308314;17331149;17331149;17334009;17334009;17334796;17336226;17338155;17339813;17342121;17342402;17346139;17346139;17348048;17348207;17348048;17348785;17354687;17354687;17354687;17356127;17356127;17356127;17356459;17356447;17356459;17358849;17358908;17359408;17364004	+;+;+;+;+;+;+;+;+;+;+;+;+;+;+;+;+;+;+;+;+;+;+;+;+;+;+;+;+;+;+	2971	0.19679	0.0665158	0.128116	0.317752	0.443194	0.408035	0.000588872	0.00266912	-1.63731
PAQR4	16;16;16;16;16;16;16;16;16;16;16;16;16	2969245;2969270;2969341;2969558;2970978;2971157;2971157;2971274;2971515;2971515;2971515;2971515;2971515	2969840;2969840;2969443;2969840;2971378;2971378;2971378;2971378;2973482;2972031;2971982;2973489;2973482	+;+;+;+;+;+;+;+;+;+;+;+;+	2972	9.55752	9.65816	8.49552	18.048	17.9604	17.0533	2.60174e-09	2.80665e-07	-1.02136
PAQR8	6;6;6;6;6;6;6	52361421;52362128;52362446;52373548;52403162;52403162;52403162	52361614;52362249;52362491;52373626;52407691;52407777;52403549	+;+;+;+;+;+;+	5057	0.211961	0.2247	0.259259	0.101826	0.120174	0.0829806	0.00338872	0.0109736	1.10868
PARD3B	2;2;2;2;2;2;2;2;2;2;2;2;2;2;2;2;2;2;2;2;2;2;2;2;2;2;2;2;2;2;2;2;2;2;2;2;2;2;2;2;2;2;2;2;2;2;2;2;2;2;2;2;2;2;2;2;2;2;2;2;2;2;2;2;2;2;2;2;2;2;2;2;2;2;2;2;2;2;2;2;2;2;2;2;2;2;2;2;2;2;2;2;2;2;2;2;2;2;2;2;2;2;2;2;2;2;2;2;2;2;2;2;2;2;2;2;2;2;2;2;2;2;2;2;2;2;2;2;2;2;2;2;2;2;2;2;2;2;2;2;2;2;2;2;2;2;2;2;2;2;2;2;2;2;2;2;2;2;2;2;2;2;2;2;2;2;2;2;2;2;2;2;2;2;2;2;2;2;2;2;2;2;2;2;2;2;2;2;2	204545793;204545793;204545840;204545842;204546000;204546000;204546000;204558024;204686181;204686181;204686181;204686181;204686181;204686181;204965152;204965152;204965152;204965152;204965152;204965152;204965152;204965152;204965152;205047581;205047581;205047581;205047581;205047581;205047581;205047581;205047581;205047581;205103692;205104426;205104426;205104426;205104426;205104426;205104426;205104426…	204546171;204546119;204546119;204546119;204546119;204546119;204546119;204558186;204686282;204686282;204686282;204686282;204686282;204686282;204965323;204965323;204965323;204965323;204965323;204965323;204965323;204965323;204965323;205047690;205047690;205047690;205047690;205047690;205047690;205047690;205047690;205048595;205103769;205104514;205104514;205104514;205104514;205104514;205104514;205104514…	+;+;+;+;+;+;+;+;+;+;+;+;+;+;+;+;+;+;+;+;+;+;+;+;+;+;+;+;+;+;+;+;+;+;+;+;+;+;+;+;+;+;+;+;+;+;+;+;+;+;+;+;+;+;+;+;+;+;+;+;+;+;+;+;+;+;+;+;+;+;+;+;+;+;+;+;+;+;+;+;+;+;+;+;+;+;+;+;+;+;+;+;+;+;+;+;+;+;+;+;+;+;+;+;+;+;+;+;+;+;+;+;+;+;+;+;+;+;+;+;+;+;+;+;+;+;+;+;+;+;+;+;+;+;+;+;+;+;+;+;+;+;+;+;+;+;+;+;+;+;+;+;+;+;+;+;+;+;+;+;+;+;+;+;+;+;+;+;+;+;+;+;+;+;+;+;+;+;+;+;+;+;+;+;+;+;+;+;+	10382	1.93818	2.18899	2.22828	0.719179	0.873163	0.952098	9.18287e-09	6.64993e-07	1.24196
PARP8	5;5;5;5;5;5;5;5;5;5;5;5;5;5;5;5;5;5;5;5;5;5;5;5;5;5;5;5;5;5;5;5;5;5;5;5;5;5;5;5;5;5;5;5;5;5;5;5;5;5;5;5;5;5;5;5;5;5;5;5;5;5;5;5;5;5;5;5;5;5;5;5;5;5;5;5;5;5;5;5;5;5;5;5;5;5;5;5;5;5;5;5;5;5;5;5;5;5;5;5;5;5;5;5;5;5;5;5;5;5;5;5;5;5;5;5;5;5;5;5;5;5;5;5;5;5;5;5;5;5;5;5;5;5;5;5;5;5;5;5;5;5;5;5;5;5;5;5;5;5;5;5;5;5;5;5;5;5;5;5;5;5;5;5;5;5;5;5;5;5;5;5;5;5;5;5;5;5;5;5;5;5;5;5;5;5;5;5;5;5;5;5;5;5;5;5;5;5;5;5…	50665899;50665899;50665899;50665901;50665973;50665990;50666374;50666688;50666761;50666819;50666938;50666938;50666967;50666967;50666967;50666979;50666981;50667004;50667085;50667085;50667085;50667085;50667085;50667085;50667085;50667085;50667085;50667089;50667557;50667884;50667893;50668071;50668071;50668071;50668071;50668071;50668071;50668071;50668071;50668071;50668071;50668071;50668071;50668071;506…	50666069;50666069;50666069;50666069;50666069;50666069;50666462;50666997;50667186;50666997;50667186;50667186;50667186;50667186;50667186;50667186;50667186;50667186;50667186;50667186;50667186;50667186;50667186;50667186;50667186;50667186;50667186;50667186;50667601;50668125;50668125;50668125;50668125;50668125;50668125;50668125;50668125;50668125;50668125;50669517;50668128;50668125;50668125;50668125;506…	+;+;+;+;+;+;+;+;+;+;+;+;+;+;+;+;+;+;+;+;+;+;+;+;+;+;+;+;+;+;+;+;+;+;+;+;+;+;+;+;+;+;+;+;+;+;+;+;+;+;+;+;+;+;+;+;+;+;+;+;+;+;+;+;+;+;+;+;+;+;+;+;+;+;+;+;+;+;+;+;+;+;+;+;+;+;+;+;+;+;+;+;+;+;+;+;+;+;+;+;+;+;+;+;+;+;+;+;+;+;+;+;+;+;+;+;+;+;+;+;+;+;+;+;+;+;+;+;+;+;+;+;+;+;+;+;+;+;+;+;+;+;+;+;+;+;+;+;+;+;+;+;+;+;+;+;+;+;+;+;+;+;+;+;+;+;+;+;+;+;+;+;+;+;+;+;+;+;+;+;+;+;+;+;+;+;+;+;+;+;+;+;+;+;+;+;+;+;+;+…	10056	0.920563	1.03663	0.963107	0.448056	0.397855	0.39875	1.79063e-07	5.73632e-06	1.14322
PBX4	19;19;19;19;19;19;19;19;19;19;19;19;19;19;19;19;19;19;19;19;19;19;19;19;19;19	19561707;19561707;19561713;19563509;19563509;19563509;19564775;19564933;19564933;19569449;19569449;19569449;19570099;19570109;19570109;19570226;19570586;19570687;19570687;19579832;19599292;19599292;19599292;19618511;19618511;19618511	19562117;19562117;19562117;19563615;19563824;19563615;19565089;19565089;19565089;19569584;19569584;19569584;19570299;19570299;19570299;19570871;19570833;19570833;19570833;19579954;19599365;19599365;19599365;19618916;19618681;19618693	-;-;-;-;-;-;-;-;-;-;-;-;-;-;-;-;-;-;-;-;-;-;-;-;-;-	2554	0.495996	0.38688	0.397425	0.974487	0.674189	1.09536	0.000250843	0.00135674	-1.18736
PCDH10	4;4;4;4;4;4;4;4;4	133149315;133149315;133154307;133154893;133154917;133162977;133162977;133190141;133208076	133153888;133152771;133154365;133155023;133155023;133163282;133163282;133194700;133208606	+;+;+;+;+;+;+;+;+	10161	10.3284	9.45207	10.7719	2.1749	2.20796	2.71193	3.13379e-13	6.63939e-10	2.0244
PCDHB4	5;5;5	141121799;141121818;141123155	141125623;141122030;141124147	+;+;+	3825	0.0891645	0.116246	0.165853	0.168278	0.291283	0.280365	0.0142795	0.0351681	-1.03614
PCLO	7;7;7;7;7;7;7;7;7;7;7;7;7;7;7;7;7;7;7;7;7;7;7;7;7;7;7;7;7;7;7;7;7;7;7;7;7;7;7;7;7;7;7;7;7;7;7;7;7;7;7;7;7;7;7;7;7;7;7;7;7;7;7;7;7;7;7;7;7;7;7;7;7;7;7;7;7;7;7;7;7;7;7;7;7;7	82754013;82760639;82761359;82801518;82801537;82805688;82805688;82820477;82821112;82822097;82822109;82822495;82822495;82824236;82824236;82824236;82824236;82826589;82826589;82826589;82826589;82827873;82827873;82827873;82827873;82835667;82835667;82838218;82838218;82838218;82838218;82838218;82841459;82841459;82841459;82841459;82841459;82845271;82845271;82845271;82845271;82845271;82845427;82846567;828…	82758715;82760784;82761493;82801591;82801591;82805829;82805829;82822689;82821294;82822689;82822689;82822590;82822689;82824416;82824416;82824416;82824416;82826660;82826660;82826660;82826660;82827966;82827966;82827966;82827966;82835693;82835693;82838342;82838342;82838342;82838342;82838342;82841509;82841509;82841509;82841509;82841509;82845485;82845485;82845485;82845485;82845485;82845485;82846634;828…	-;-;-;-;-;-;-;-;-;-;-;-;-;-;-;-;-;-;-;-;-;-;-;-;-;-;-;-;-;-;-;-;-;-;-;-;-;-;-;-;-;-;-;-;-;-;-;-;-;-;-;-;-;-;-;-;-;-;-;-;-;-;-;-;-;-;-;-;-;-;-;-;-;-;-;-;-;-;-;-;-;-;-;-;-;-	22873	1.1886	1.28301	1.71034	0.521543	0.445037	0.487194	1.2515e-08	8.43791e-07	1.44048
PCNX3	11;11;11;11;11;11;11;11;11;11;11;11;11;11;11;11;11;11;11;11;11;11;11;11;11;11;11;11;11;11;11;11;11;11;11;11;11;11;11;11;11;11;11;11;11;11;11;11;11;11;11;11;11;11;11;11;11;11;11	65615773;65616824;65617250;65617470;65617611;65617940;65619537;65619754;65619858;65620339;65620831;65620831;65622245;65622245;65623491;65623929;65624195;65624471;65624925;65625127;65625171;65625405;65625405;65625652;65625652;65625904;65625904;65626853;65626904;65627405;65627405;65628595;65628595;65628819;65628819;65629357;65629357;65629520;65629520;65630351;65630351;65630411;65634079;65634126;656…	65616464;65617011;65617349;65617509;65617706;65619067;65619660;65619932;65619932;65620429;65620966;65620966;65622299;65622366;65623644;65623961;65624366;65624581;65625016;65625280;65625280;65625510;65625510;65625744;65625744;65626779;65626054;65627048;65627048;65627582;65627582;65628703;65628703;65628948;65628948;65629415;65629415;65629735;65629735;65630604;65630604;65630604;65634356;65634356;656…	+;+;+;+;+;+;+;+;+;+;+;+;+;+;+;+;+;+;+;+;+;+;+;+;+;+;+;+;+;+;+;+;+;+;+;+;+;+;+;+;+;+;+;+;+;+;+;+;+;+;+;+;+;+;+;+;+;+;+	7972	8.56241	8.44067	9.86226	4.03704	3.47491	3.93618	6.66017e-10	1.05231e-07	1.14681
PCP4	21;21;21;21;21;21;21;21;21;21;21;21;21;21	39867317;39867439;39867451;39883453;39898476;39898476;39898476;39898476;39916066;39926047;39928984;39928984;39928984;39928984	39867510;39867510;39867510;39883632;39898527;39898527;39898527;39898527;39916186;39926191;39929397;39929397;39929397;39929397	+;+;+;+;+;+;+;+;+;+;+;+;+;+	1106	2.11452	2.09947	1.33837	9.93239	10.7148	9.31674	1.28312e-10	2.86722e-08	-2.52568
PCSK2	20;20;20;20;20;20;20;20;20;20;20;20;20;20;20;20;20;20;20;20;20;20;20;20;20;20;20;20;20;20;20;20;20;20;20;20;20;20;20;20;20;20;20;20	17226107;17226991;17227056;17227330;17228131;17260240;17260240;17260240;17358327;17358327;17358327;17358327;17360532;17360532;17360532;17360532;17369240;17369240;17369240;17369240;17409263;17409263;17409263;17409263;17429435;17429435;17429435;17436708;17436708;17436708;17453742;17453742;17453742;17456348;17456348;17456348;17463433;17465326;17465326;17465326;17481584;17481584;17481584;17481584	17226379;17227482;17227482;17227482;17228302;17260344;17260344;17260344;17358440;17358440;17358440;17358440;17360640;17360640;17360640;17360640;17369277;17369277;17369277;17369277;17409310;17409339;17409339;17409339;17429523;17429523;17429523;17436883;17436883;17436883;17453957;17453957;17453957;17456448;17456448;17456448;17465553;17465553;17465553;17465553;17482287;17482283;17484578;17484578	+;+;+;+;+;+;+;+;+;+;+;+;+;+;+;+;+;+;+;+;+;+;+;+;+;+;+;+;+;+;+;+;+;+;+;+;+;+;+;+;+;+;+;+	7078	1.56257	1.41694	1.61928	0.442569	0.386373	0.507233	1.75951e-09	2.23759e-07	1.69692
PDLIM7	5;5;5;5;5;5;5;5;5;5;5;5;5;5;5;5;5;5;5;5;5;5;5;5;5;5;5;5;5;5;5;5;5;5;5;5;5;5;5;5;5;5;5;5;5;5;5;5;5;5;5;5;5;5;5;5;5;5;5;5;5;5;5;5;5;5;5;5;5;5;5;5;5;5;5;5;5;5;5;5;5;5;5;5;5;5;5;5;5;5;5;5;5;5;5;5;5;5;5;5;5;5;5;5;5;5;5;5;5;5;5;5;5;5;5;5;5	177483394;177483394;177483396;177483398;177483695;177483867;177483867;177483867;177483867;177483867;177483875;177484070;177484070;177484070;177484070;177484070;177484070;177484839;177487897;177488068;177488068;177488068;177488068;177489393;177489393;177489393;177489393;177489393;177489771;177489771;177489771;177489771;177489811;177490246;177490870;177490870;177490870;177490870;177490870;177490870…	177483730;177483730;177483730;177483730;177483730;177483982;177483982;177483982;177483982;177483982;177483982;177484473;177484190;177484190;177484190;177484190;177484190;177485014;177488248;177488248;177488248;177488248;177488248;177489627;177489627;177489627;177489627;177489627;177490031;177489832;177489832;177489832;177490099;177490593;177490906;177490906;177490906;177490906;177490906;177490906…	-;-;-;-;-;-;-;-;-;-;-;-;-;-;-;-;-;-;-;-;-;-;-;-;-;-;-;-;-;-;-;-;-;-;-;-;-;-;-;-;-;-;-;-;-;-;-;-;-;-;-;-;-;-;-;-;-;-;-;-;-;-;-;-;-;-;-;-;-;-;-;-;-;-;-;-;-;-;-;-;-;-;-;-;-;-;-;-;-;-;-;-;-;-;-;-;-;-;-;-;-;-;-;-;-;-;-;-;-;-;-;-;-;-;-;-;-	4407	8.0927	7.33165	7.79251	22.882	20.9722	19.2978	8.91889e-12	4.65031e-09	-1.52784
PEAK1	15;15;15;15;15;15;15;15;15;15;15;15;15;15;15;15;15;15;15;15;15;15;15;15;15;15;15;15;15;15;15;15;15;15;15;15;15;15;15;15;15;15;15;15;15;15;15;15;15;15;15	77100656;77108164;77133005;77133005;77155200;77158503;77158503;77177819;77177856;77178790;77178790;77178790;77178790;77179958;77181747;77181979;77252367;77252367;77252367;77252367;77252367;77252422;77252479;77252499;77255449;77283762;77283883;77283883;77283883;77284958;77284958;77284958;77284958;77284958;77286423;77286423;77286423;77286423;77286423;77286423;77346542;77365163;77365163;77365163;773…	77115319;77115319;77133750;77133750;77158696;77158696;77158696;77182040;77178023;77179147;77179808;77182040;77182040;77182040;77182040;77182040;77252526;77252526;77252531;77252526;77252526;77252526;77252526;77252526;77255552;77284030;77284030;77284030;77284030;77285100;77285078;77285055;77285078;77285078;77286504;77286504;77286504;77286504;77286504;77286504;77346631;77365225;77365225;77365225;773…	-;-;-;-;-;-;-;-;-;-;-;-;-;-;-;-;-;-;-;-;-;-;-;-;-;-;-;-;-;-;-;-;-;-;-;-;-;-;-;-;-;-;-;-;-;-;-;-;-;-;-	24184	1.46666	1.56688	2.19123	0.597958	0.550746	0.736482	3.36165e-07	8.86568e-06	1.3892
PGM2L1	11;11;11;11;11;11;11;11;11;11;11;11;11;11;11	74330318;74338468;74342461;74342885;74343323;74345469;74346732;74347148;74351383;74368492;74370902;74371711;74374415;74397746;74398051	74336754;74338601;74342650;74343014;74343416;74345649;74346829;74347337;74351576;74368575;74370986;74371817;74374582;74398408;74398473	-;-;-;-;-;-;-;-;-;-;-;-;-;-;-	8820	2.47477	2.25177	2.11942	1.03629	1.03928	1.13129	3.49057e-08	1.79604e-06	1.00998
PGM5	9;9;9;9;9;9;9;9;9;9;9;9;9;9;9;9;9;9;9;9;9;9;9;9;9;9;9;9;9;9;9;9;9;9;9;9;9;9;9;9;9;9;9;9;9;9;9;9	68328308;68328889;68339263;68356899;68356899;68357230;68371612;68378199;68378199;68378199;68378199;68384398;68384398;68384398;68387463;68387463;68387463;68387463;68391534;68391534;68391534;68391534;68392319;68392319;68392319;68396524;68400595;68402397;68405010;68405010;68405347;68405347;68406255;68406255;68464521;68465093;68465093;68465093;68466162;68479418;68479418;68483865;68483865;68496825;684…	68328690;68328957;68339339;68357388;68357388;68357388;68371698;68378361;68378361;68378361;68378361;68384544;68384544;68384544;68387588;68387588;68387588;68387588;68391701;68391724;68391724;68391724;68392473;68392473;68392473;68396590;68400734;68402488;68405165;68405165;68405400;68405400;68406344;68406345;68464596;68465208;68465208;68465208;68466555;68479553;68479553;68484048;68484048;68499361;684…	+;+;+;+;+;+;+;+;+;+;+;+;+;+;+;+;+;+;+;+;+;+;+;+;+;+;+;+;+;+;+;+;+;+;+;+;+;+;+;+;+;+;+;+;+;+;+;+	7426	1.20066	0.805003	1.04222	0.30626	0.177314	0.194641	6.09594e-08	2.6124e-06	2.0649
PHLDA1	12;12;12;12;12;12	76025447;76025447;76025447;76030510;76030510;76030510	76030092;76030092;76030092;76033932;76031776;76031604	-;-;-;-;-;-	8069	3.17608	2.77974	2.67834	7.54625	7.1236	7.70838	1.89781e-11	7.81196e-09	-1.45774
PLA2G3	22;22;22;22;22;22;22	31134809;31136683;31136908;31137710;31138276;31138667;31139841	31135936;31136799;31137040;31137993;31138410;31138799;31140607	-;-;-;-;-;-;-	2697	0.162587	0.201502	0.141132	0.350034	0.525776	0.587794	0.000275351	0.00146299	-1.60539
PLA2G4F	15;15;15;15;15;15;15;15;15;15;15;15;15;15;15;15;15;15;15;15;15;15;15;15;15;15;15;15;15;15;15;15;15;15;15;15;15;15;15;15;15;15;15;15;15;15;15;15;15;15;15;15;15;15;15;15;15;15;15;15;15;15;15;15;15;15;15;15;15;15;15;15;15;15;15;15	42139034;42141198;42141204;42141209;42142528;42142528;42142528;42142528;42143978;42143978;42143978;42144450;42144450;42144450;42144450;42145575;42145575;42145575;42145575;42145766;42145766;42145766;42146127;42146127;42146127;42146675;42147124;42147124;42147124;42147626;42147626;42147626;42147626;42149713;42149713;42149713;42150104;42150104;42150104;42150373;42150373;42150373;42150608;42150608;421…	42142204;42142204;42142204;42142204;42142714;42142714;42142714;42142714;42144144;42144144;42144144;42144644;42144644;42144644;42144644;42145682;42145587;42145682;42145682;42145903;42145903;42145903;42146241;42146241;42146241;42147346;42147346;42147346;42147346;42147733;42147762;42147762;42147762;42149848;42149848;42149848;42150141;42150141;42150141;42150486;42150486;42150486;42150712;42150777;421…	-;-;-;-;-;-;-;-;-;-;-;-;-;-;-;-;-;-;-;-;-;-;-;-;-;-;-;-;-;-;-;-;-;-;-;-;-;-;-;-;-;-;-;-;-;-;-;-;-;-;-;-;-;-;-;-;-;-;-;-;-;-;-;-;-;-;-;-;-;-;-;-;-;-;-;-	6103	1.70842	1.61903	1.7671	0.801549	0.66385	0.924419	1.138e-06	2.15503e-05	1.00628
PLBD1	12;12;12;12;12;12;12;12;12;12;12;12;12;12;12;12;12;12;12;12;12;12;12;12;12	14503661;14506162;14506933;14511260;14511260;14511511;14511511;14511511;14535659;14535659;14535659;14536570;14536570;14536694;14540764;14540764;14540764;14542208;14542208;14542208;14553193;14553193;14554154;14567582;14567582	14503954;14506268;14507118;14511400;14511400;14511711;14511711;14511711;14536125;14535803;14535803;14536710;14536710;14536710;14540902;14540902;14540902;14542291;14542291;14542291;14553412;14553412;14554246;14567728;14568349	-;-;-;-;-;-;-;-;-;-;-;-;-;-;-;-;-;-;-;-;-;-;-;-;-	2841	2.1094	2.7476	1.90547	0.830731	0.926948	0.705707	2.03228e-06	3.32128e-05	1.37028
PLCB2	15;15;15;15;15;15;15;15;15;15;15;15;15;15;15;15;15;15;15;15;15;15;15;15;15;15;15;15;15;15;15;15;15;15;15;15;15;15;15;15;15;15;15;15;15;15;15;15;15;15;15;15;15;15;15;15;15;15;15;15;15;15;15;15;15;15;15;15;15;15;15;15;15;15;15;15;15;15;15;15;15;15;15;15;15;15;15;15;15;15;15;15;15;15;15;15;15;15;15;15;15;15;15;15;15;15;15;15;15;15;15;15;15;15;15;15;15;15;15;15;15;15;15;15;15;15;15;15;15;15;15;15;15;…	40278176;40284256;40284439;40287907;40287908;40287909;40287909;40287909;40288139;40288572;40288602;40289066;40289272;40289272;40289272;40289272;40289272;40289272;40289272;40289272;40289272;40290025;40290025;40290025;40290025;40290025;40290025;40290025;40290577;40290577;40290577;40290577;40290577;40290577;40290577;40290577;40290761;40290761;40290761;40290761;40290761;40291018;40291018;40291018;402…	40278344;40284531;40284531;40288918;40288918;40288918;40288008;40288918;40288918;40288642;40288918;40289358;40289358;40289358;40289358;40289292;40289358;40289358;40289358;40289572;40289358;40290082;40290082;40290082;40290082;40290082;40290082;40290082;40290837;40290837;40290672;40290672;40290672;40290672;40290672;40290672;40290837;40290837;40290837;40290837;40290837;40291183;40291183;40291329;402…	-;-;-;-;-;-;-;-;-;-;-;-;-;-;-;-;-;-;-;-;-;-;-;-;-;-;-;-;-;-;-;-;-;-;-;-;-;-;-;-;-;-;-;-;-;-;-;-;-;-;-;-;-;-;-;-;-;-;-;-;-;-;-;-;-;-;-;-;-;-;-;-;-;-;-;-;-;-;-;-;-;-;-;-;-;-;-;-;-;-;-;-;-;-;-;-;-;-;-;-;-;-;-;-;-;-;-;-;-;-;-;-;-;-;-;-;-;-;-;-;-;-;-;-;-;-;-;-;-;-;-;-;-;-;-;-;-;-;-;-;-;-;-;-;-;-;-;-;-;-;-;-;-;-;-;-;-;-;-;-;-;-;-;-;-;-;-;-;-;-	7350	0.291669	0.268869	0.25318	0.105088	0.117135	0.13956	0.000556517	0.00254385	1.08257
PLCB4	20;20;20;20;20;20;20;20;20;20;20;20;20;20;20;20;20;20;20;20;20;20;20;20;20;20;20;20;20;20;20;20;20;20;20;20;20;20;20;20;20;20;20;20;20;20;20;20;20;20;20;20;20;20;20;20;20;20;20;20;20;20;20;20;20;20;20;20;20;20;20;20;20;20;20;20;20;20;20;20;20;20;20;20;20;20;20;20;20;20;20;20;20;20;20;20;20;20;20;20;20;20;20;20;20;20;20;20;20;20;20;20;20;20;20;20;20;20;20;20;20;20;20;20;20;20;20;20;20;20;20;20;20;…	9068763;9068807;9069054;9069101;9096287;9096287;9166358;9217390;9217390;9217390;9217390;9217390;9217390;9307800;9307800;9307800;9307800;9307800;9307800;9307800;9307800;9307800;9307800;9337126;9337126;9337126;9337126;9337126;9337126;9337126;9337126;9337126;9337126;9338008;9338008;9338008;9338008;9338008;9338008;9338008;9338008;9338008;9338008;9338894;9338894;9338894;9338894;9338894;9338894;9338894…	9068903;9068903;9069206;9069206;9096342;9096342;9166695;9217452;9217452;9217452;9217452;9217452;9217452;9307898;9307898;9307898;9307898;9307898;9307898;9307898;9307898;9307898;9307898;9337206;9337206;9337206;9337206;9337206;9337206;9337206;9337206;9337206;9337206;9338067;9338067;9338067;9338067;9338021;9338067;9338067;9338067;9338067;9338067;9339037;9339037;9339037;9339037;9339037;9338912;9339037…	+;+;+;+;+;+;+;+;+;+;+;+;+;+;+;+;+;+;+;+;+;+;+;+;+;+;+;+;+;+;+;+;+;+;+;+;+;+;+;+;+;+;+;+;+;+;+;+;+;+;+;+;+;+;+;+;+;+;+;+;+;+;+;+;+;+;+;+;+;+;+;+;+;+;+;+;+;+;+;+;+;+;+;+;+;+;+;+;+;+;+;+;+;+;+;+;+;+;+;+;+;+;+;+;+;+;+;+;+;+;+;+;+;+;+;+;+;+;+;+;+;+;+;+;+;+;+;+;+;+;+;+;+;+;+;+;+;+;+;+;+;+;+;+;+;+;+;+;+;+;+;+;+;+;+;+;+;+;+;+;+;+;+;+;+;+;+;+;+;+;+;+;+;+;+;+;+;+;+;+;+;+;+;+;+;+;+;+;+;+;+;+;+;+;+;+;+;+;+;+…	6900	2.18896	2.23395	2.5253	1.06345	0.946813	1.11497	4.8214e-08	2.25123e-06	1.0689
PLEK2	14;14;14;14;14;14;14;14;14;14;14;14;14;14;14;14;14;14;14;14;14;14;14;14;14;14;14;14;14;14;14;14;14;14	67386983;67386987;67387388;67388219;67388224;67388224;67388246;67388252;67390663;67390663;67390663;67390663;67392326;67392326;67392326;67392662;67392662;67392662;67392662;67393150;67393150;67393150;67395402;67395402;67395402;67397662;67397662;67397662;67397662;67397746;67398007;67412018;67412018;67412018	67387456;67387456;67387456;67388302;67388302;67388302;67388302;67388302;67390746;67390746;67390746;67390746;67392427;67392427;67392427;67392849;67392705;67392849;67392849;67393241;67393241;67393241;67395583;67395583;67395583;67397670;67397826;67397820;67397826;67397826;67398055;67412167;67412071;67412200	-;-;-;-;-;-;-;-;-;-;-;-;-;-;-;-;-;-;-;-;-;-;-;-;-;-;-;-;-;-;-;-;-;-	1603	1.03341	0.862962	0.712352	1.74	1.70602	1.68702	0.000157891	0.000943728	-1.06522
PLEKHA4	19;19;19;19;19;19;19;19;19;19;19;19;19;19;19;19;19;19;19;19;19;19;19;19;19;19;19;19;19;19;19;19;19;19;19;19;19;19;19;19;19;19;19;19;19;19;19;19;19;19;19;19;19;19;19;19;19;19;19;19;19;19;19;19;19;19;19;19;19;19;19;19;19;19;19;19	48837097;48837097;48837110;48837183;48838017;48838017;48838017;48838017;48839205;48841149;48841149;48845141;48845193;48845370;48845370;48845370;48845517;48845517;48845517;48845517;48845551;48847900;48847900;48847900;48847900;48852228;48852228;48852228;48852228;48852238;48853682;48853682;48853682;48853682;48854007;48854007;48854007;48854007;48854217;48854217;48854217;48854217;48857422;48857422;488…	48837551;48837551;48837551;48837551;48838129;48838314;48838129;48838129;48839263;48841310;48841310;48845446;48845616;48845446;48845446;48845446;48845596;48845551;48845616;48845616;48845616;48848040;48848040;48848040;48848040;48852306;48852326;48852326;48852326;48852326;48853831;48853831;48853831;48853831;48854087;48854087;48854087;48854087;48854264;48854264;48854264;48854264;48857496;48857496;488…	-;-;-;-;-;-;-;-;-;-;-;-;-;-;-;-;-;-;-;-;-;-;-;-;-;-;-;-;-;-;-;-;-;-;-;-;-;-;-;-;-;-;-;-;-;-;-;-;-;-;-;-;-;-;-;-;-;-;-;-;-;-;-;-;-;-;-;-;-;-;-;-;-;-;-;-	3851	0.974187	0.987835	0.93349	2.49599	2.23562	3.35377	3.48652e-08	1.79604e-06	-1.56398
PLEKHB1	11;11;11;11;11;11;11;11;11;11;11;11;11;11;11;11;11;11;11;11;11;11;11;11;11;11;11;11;11;11;11;11;11;11;11;11;11;11;11;11;11;11;11;11;11;11;11;11;11;11;11;11;11;11;11;11;11;11;11;11;11;11;11;11;11;11;11;11;11;11;11;11;11;11;11;11;11;11;11;11;11;11;11;11;11;11;11;11;11;11;11;11;11;11;11;11;11;11;11;11;11;11;11;11;11;11;11;11;11;11;11;11;11;11;11;11;11;11;11;11;11;11	73646178;73646178;73646579;73647389;73647549;73647609;73647626;73647653;73647655;73647655;73647655;73647655;73647655;73647689;73647714;73647932;73648186;73648690;73648914;73649012;73649012;73649012;73649012;73649012;73649012;73649012;73649012;73649012;73649012;73649012;73649012;73649012;73649012;73649012;73649012;73650532;73650532;73650553;73650553;73650553;73650553;73650553;73650553;73650553;736…	73646626;73646626;73646626;73647529;73647738;73647738;73647738;73647738;73647738;73647738;73647738;73647895;73647738;73647738;73647866;73648087;73648278;73649087;73649087;73649087;73649087;73649087;73649087;73649087;73649087;73649087;73649087;73649087;73649087;73649087;73649087;73649087;73649087;73649087;73649087;73650705;73650705;73650705;73650705;73650705;73650705;73650705;73650705;73650705;736…	+;+;+;+;+;+;+;+;+;+;+;+;+;+;+;+;+;+;+;+;+;+;+;+;+;+;+;+;+;+;+;+;+;+;+;+;+;+;+;+;+;+;+;+;+;+;+;+;+;+;+;+;+;+;+;+;+;+;+;+;+;+;+;+;+;+;+;+;+;+;+;+;+;+;+;+;+;+;+;+;+;+;+;+;+;+;+;+;+;+;+;+;+;+;+;+;+;+;+;+;+;+;+;+;+;+;+;+;+;+;+;+;+;+;+;+;+;+;+;+;+;+	4933	6.57792	5.64853	5.82134	2.38346	1.86846	2.03214	5.716e-10	9.30565e-08	1.43378
PLEKHO1	1;1;1;1;1;1;1;1;1;1;1;1;1;1;1;1;1;1;1;1;1;1;1;1;1;1;1;1;1;1;1;1	150149183;150149980;150150607;150150637;150150912;150150912;150152761;150153483;150155790;150156066;150156066;150156066;150156911;150156911;150156911;150156911;150156911;150156929;150157017;150157372;150157385;150157385;150157385;150158819;150158819;150158819;150158819;150158819;150158819;150159405;150164196;150164437	150149786;150150287;150151058;150151058;150151058;150151058;150153023;150156206;150156206;150156206;150156206;150156206;150157195;150157015;150157015;150157015;150157015;150157015;150157486;150157486;150157486;150157486;150157486;150159324;150158986;150159628;150159043;150160065;150159630;150159497;150164302;150164720	+;+;+;+;+;+;+;+;+;+;+;+;+;+;+;+;+;+;+;+;+;+;+;+;+;+;+;+;+;+;+;+	6565	0.20038	0.158034	0.27057	1.00006	0.786844	0.781241	3.01088e-08	1.62962e-06	-2.09758
PNKD	2;2;2;2;2;2;2;2;2;2;2;2;2;2;2;2;2;2;2;2;2;2;2;2;2;2;2;2;2;2;2;2;2;2;2;2;2;2;2	218270392;218270485;218270520;218271380;218271381;218271381;218272570;218272570;218316728;218317917;218317955;218323173;218334703;218339783;218339783;218339783;218340029;218340029;218340029;218340095;218340728;218340728;218340728;218340728;218341534;218341534;218341534;218341981;218341981;218341981;218343500;218343500;218343500;218344455;218344455;218344455;218344808;218344808;218344808	218270602;218270602;218271549;218271549;218271549;218271549;218272911;218272947;218316883;218318008;218318256;218323431;218334758;218339898;218339898;218339898;218340141;218340141;218340141;218340141;218340889;218340786;218340786;218340786;218341626;218341626;218341626;218342144;218342144;218342144;218343586;218343586;218343586;218344570;218344570;218344570;218344981;218346791;218346793	+;+;+;+;+;+;+;+;+;+;+;+;+;+;+;+;+;+;+;+;+;+;+;+;+;+;+;+;+;+;+;+;+;+;+;+;+;+;+	5184	5.09401	5.64188	5.14788	10.5456	10.1795	10.865	5.77067e-10	9.30565e-08	-1.07479
POLR2A	17;17;17;17;17;17;17;17;17;17;17;17;17;17;17;17;17;17;17;17;17;17;17;17;17;17;17;17;17;17;17;17;17;17;17;17;17;17;17;17;17;17;17;17;17;17;17;17;17;17;17;17;17;17;17;17;17	7484366;7484620;7495941;7495941;7496210;7496210;7496440;7496440;7496764;7496764;7497356;7497356;7497650;7497650;7497781;7498078;7498078;7498078;7498826;7499039;7499039;7499281;7499281;7499281;7500639;7500639;7500940;7501289;7501526;7501900;7502085;7502518;7502518;7502921;7503121;7503385;7503385;7503401;7503586;7503586;7503586;7508251;7508471;7508944;7508944;7509532;7509532;7511215;7511406;7511515…	7484857;7484857;7496073;7496073;7496346;7496346;7496613;7496613;7497045;7497045;7497517;7497517;7497870;7497870;7497870;7498210;7498519;7498210;7499163;7499163;7499163;7499758;7499491;7499491;7500791;7500848;7501108;7501383;7501729;7502122;7502122;7502724;7502701;7503292;7503292;7503490;7503490;7503490;7503655;7503956;7503791;7508475;7508475;7509190;7509190;7509927;7509632;7511319;7511588;7511588…	+;+;+;+;+;+;+;+;+;+;+;+;+;+;+;+;+;+;+;+;+;+;+;+;+;+;+;+;+;+;+;+;+;+;+;+;+;+;+;+;+;+;+;+;+;+;+;+;+;+;+;+;+;+;+;+;+	8355	83.0695	85.3449	109.53	36.0904	35.1443	43.5789	1.52635e-08	9.82519e-07	1.19308
POLR2E	19;19;19;19;19;19;19;19;19;19;19;19;19;19;19;19;19;19;19;19;19;19;19;19;19;19;19;19;19;19;19;19;19;19;19;19;19;19;19;19;19;19;19;19;19;19;19;19;19;19;19;19;19;19;19;19;19;19;19;19;19;19;19;19;19;19;19;19;19;19;19;19;19;19;19;19;19;19;19;19;19;19;19;19;19;19;19;19;19;19	1086579;1086579;1086595;1087645;1088066;1088148;1088148;1088163;1088167;1088388;1088424;1088609;1088645;1089472;1089472;1089472;1089472;1089472;1089472;1089472;1089472;1089472;1089472;1089490;1089884;1089884;1089884;1089884;1089884;1089884;1089884;1089884;1089884;1089884;1089897;1090087;1090087;1090087;1090087;1090087;1090087;1090087;1090087;1090087;1090087;1090087;1090908;1090908;1090908;1090908…	1088720;1086988;1086988;1088681;1088166;1088720;1088720;1088720;1088720;1088720;1088720;1088720;1088713;1089930;1089551;1089551;1089573;1089551;1089551;1089551;1089551;1089551;1089551;1089551;1089962;1089962;1089962;1089962;1089962;1089962;1089962;1089962;1089962;1089962;1089962;1090141;1090145;1090145;1090145;1090145;1090145;1090145;1090145;1090141;1090145;1090145;1090988;1090988;1090988;1090988…	-;-;-;-;-;-;-;-;-;-;-;-;-;-;-;-;-;-;-;-;-;-;-;-;-;-;-;-;-;-;-;-;-;-;-;-;-;-;-;-;-;-;-;-;-;-;-;-;-;-;-;-;-;-;-;-;-;-;-;-;-;-;-;-;-;-;-;-;-;-;-;-;-;-;-;-;-;-;-;-;-;-;-;-;-;-;-;-;-;-	4865	1.94287	1.44202	1.76473	8.81153	8.45272	7.9355	3.82013e-13	6.63939e-10	-2.37325
PPARG	3;3;3;3;3;3;3;3;3;3;3;3;3;3;3;3;3;3;3;3;3;3;3;3;3;3;3;3;3;3;3;3;3;3;3;3;3;3;3;3;3;3;3;3;3;3;3;3;3;3;3;3;3;3;3;3;3;3;3;3;3;3;3;3;3;3;3;3;3;3;3;3;3;3;3;3;3;3;3;3;3;3;3;3;3;3;3	12287368;12287388;12287860;12287901;12288838;12288838;12289071;12289111;12305773;12312380;12312380;12312380;12312380;12312380;12312380;12312388;12351472;12351472;12351569;12371851;12371851;12379704;12379704;12379704;12379704;12379704;12379704;12379704;12379704;12379704;12379704;12379704;12379704;12379704;12379706;12381322;12381322;12381322;12381322;12381322;12381322;12381322;12381322;12381322;123…	12287675;12287675;12288020;12288020;12289134;12289134;12289134;12289134;12305959;12312453;12312453;12312453;12312453;12312453;12312453;12312453;12351674;12351674;12351674;12372111;12372111;12379931;12379931;12379931;12379931;12379931;12379931;12379931;12379931;12379834;12379931;12379931;12379931;12379931;12379931;12381491;12381491;12381491;12381491;12381491;12381392;12381491;12381491;12381491;123…	+;+;+;+;+;+;+;+;+;+;+;+;+;+;+;+;+;+;+;+;+;+;+;+;+;+;+;+;+;+;+;+;+;+;+;+;+;+;+;+;+;+;+;+;+;+;+;+;+;+;+;+;+;+;+;+;+;+;+;+;+;+;+;+;+;+;+;+;+;+;+;+;+;+;+;+;+;+;+;+;+;+;+;+;+;+;+	4046	1.68588	1.20886	1.08711	4.48625	3.67998	4.10252	5.04148e-09	4.37432e-07	-1.71422
PPFIA2	12;12;12;12;12;12;12;12;12;12;12;12;12;12;12;12;12;12;12;12;12;12;12;12;12;12;12;12;12;12;12;12;12;12;12;12;12;12;12;12;12;12;12;12;12;12;12;12;12;12;12;12;12;12;12;12;12;12;12;12;12;12;12;12;12;12;12;12;12;12;12;12;12;12;12;12;12;12;12;12;12;12;12;12;12;12;12;12;12;12;12;12;12;12;12;12;12;12;12;12;12;12;12;12;12;12;12;12;12;12;12;12;12;12;12;12;12;12;12;12;12;12;12;12;12;12;12;12;12;12;12;12;12;…	81257975;81257975;81258266;81258267;81258877;81259101;81259166;81259268;81259436;81259601;81261949;81261949;81261949;81261949;81261949;81261949;81261961;81261967;81261967;81263231;81263231;81263231;81263231;81263231;81263231;81263231;81263231;81263231;81263231;81263231;81263231;81266952;81266952;81266952;81266952;81266952;81266952;81266952;81266952;81266952;81266952;81266952;81266952;81267912;812…	81259660;81259660;81259660;81259660;81259660;81259396;81259660;81259660;81259660;81259660;81262040;81262040;81262040;81262040;81262040;81262040;81262040;81262040;81262040;81263390;81263390;81263390;81263390;81263390;81263390;81263390;81263390;81263390;81263390;81263390;81263390;81267020;81267020;81267020;81267020;81267020;81267020;81267020;81267020;81267020;81267020;81267020;81267020;81268087;812…	-;-;-;-;-;-;-;-;-;-;-;-;-;-;-;-;-;-;-;-;-;-;-;-;-;-;-;-;-;-;-;-;-;-;-;-;-;-;-;-;-;-;-;-;-;-;-;-;-;-;-;-;-;-;-;-;-;-;-;-;-;-;-;-;-;-;-;-;-;-;-;-;-;-;-;-;-;-;-;-;-;-;-;-;-;-;-;-;-;-;-;-;-;-;-;-;-;-;-;-;-;-;-;-;-;-;-;-;-;-;-;-;-;-;-;-;-;-;-;-;-;-;-;-;-;-;-;-;-;-;-;-;-;-;-;-;-;-;-;-;-;-;-;-;-;-;-;-;-;-;-;-;-;-;-;-;-;-;-;-;-;-;-;-;-;-;-;-;-;-;-;-;-;-;-;-;-;-;-;-;-;-;-;-;-;-;-;-;-;-;-;-;-;-;-;-;-;-;-;-…	8573	0.306893	0.293903	0.226929	0.0350376	0.0708879	0.0435095	1.34069e-06	2.42235e-05	2.38928
PPFIBP1	12;12;12;12;12;12;12;12;12;12;12;12;12;12;12;12;12;12;12;12;12;12;12;12;12;12;12;12;12;12;12;12;12;12;12;12;12;12;12;12;12;12;12;12;12;12;12;12;12;12;12;12;12;12;12;12;12;12;12;12;12;12;12;12;12;12;12;12;12;12;12;12;12;12;12;12;12;12;12;12;12;12;12;12;12;12;12;12;12;12;12;12;12;12;12;12;12;12;12;12;12;12;12;12;12;12;12;12;12;12;12;12;12;12;12;12;12;12;12;12;12;12;12;12;12;12;12;12;12;12;12;12;12;…	27523431;27524142;27524158;27524173;27524174;27524182;27524206;27524220;27524224;27524256;27538123;27578152;27578152;27578152;27578152;27578152;27578152;27578152;27578152;27578152;27578152;27578152;27584125;27599348;27633362;27633362;27633362;27633362;27633362;27633362;27633362;27633362;27634910;27634910;27634910;27634910;27634910;27634910;27634910;27634910;27646062;27646062;27646062;27646062;276…	27523707;27524365;27524365;27524365;27524365;27524365;27524365;27524365;27524365;27524365;27538299;27578239;27578239;27578239;27578239;27578239;27578239;27578239;27578239;27578239;27578239;27578239;27584418;27599479;27633460;27633460;27633460;27633460;27633460;27633460;27633460;27633460;27635104;27635115;27635115;27635115;27635115;27635115;27637319;27635115;27646148;27646148;27646148;27646148;276…	+;+;+;+;+;+;+;+;+;+;+;+;+;+;+;+;+;+;+;+;+;+;+;+;+;+;+;+;+;+;+;+;+;+;+;+;+;+;+;+;+;+;+;+;+;+;+;+;+;+;+;+;+;+;+;+;+;+;+;+;+;+;+;+;+;+;+;+;+;+;+;+;+;+;+;+;+;+;+;+;+;+;+;+;+;+;+;+;+;+;+;+;+;+;+;+;+;+;+;+;+;+;+;+;+;+;+;+;+;+;+;+;+;+;+;+;+;+;+;+;+;+;+;+;+;+;+;+;+;+;+;+;+;+;+;+;+;+;+;+;+;+;+;+;+;+;+;+;+;+;+;+;+;+;+;+;+;+;+;+;+;+;+;+;+;+;+;+;+;+;+;+;+;+;+;+;+;+;+;+;+;+;+;+;+;+;+;+;+;+;+;+;+;+;+;+;+	11690	2.40901	2.33288	2.71338	6.39811	6.41599	6.53719	5.55562e-12	3.76208e-09	-1.45813
PPP2R2B	5;5;5;5;5;5;5;5;5;5;5;5;5;5;5;5;5;5;5;5;5;5;5;5;5;5;5;5;5;5;5;5;5;5;5;5;5;5;5;5;5;5;5;5;5;5;5;5;5;5;5;5;5;5;5;5;5;5;5;5;5;5;5;5;5;5;5;5;5;5;5;5;5;5;5;5;5;5;5;5;5;5;5;5;5;5;5;5;5;5;5;5;5;5;5;5;5;5;5;5;5;5;5;5;5;5;5;5;5;5;5;5;5;5;5;5;5;5;5;5;5;5;5;5;5;5;5;5;5;5;5;5;5;5;5;5;5;5;5;5;5;5;5;5;5	146581146;146589504;146589504;146589504;146589507;146589509;146589511;146589511;146589672;146589947;146590038;146592049;146592971;146592971;146592971;146592971;146592971;146592971;146592971;146592971;146592971;146592971;146592971;146600291;146600291;146600291;146600291;146600291;146600291;146600291;146600291;146600291;146600291;146600291;146638251;146638251;146638251;146638251;146638251;146638251…	146590226;146590226;146590226;146590226;146590226;146590226;146590226;146590226;146590226;146590226;146590226;146592193;146593062;146593062;146593062;146593062;146593062;146593062;146593062;146593062;146593062;146593062;146593062;146600376;146600460;146600460;146600460;146600460;146600460;146600460;146600460;146600460;146600460;146600460;146638415;146638415;146638415;146638415;146638415;146638415…	-;-;-;-;-;-;-;-;-;-;-;-;-;-;-;-;-;-;-;-;-;-;-;-;-;-;-;-;-;-;-;-;-;-;-;-;-;-;-;-;-;-;-;-;-;-;-;-;-;-;-;-;-;-;-;-;-;-;-;-;-;-;-;-;-;-;-;-;-;-;-;-;-;-;-;-;-;-;-;-;-;-;-;-;-;-;-;-;-;-;-;-;-;-;-;-;-;-;-;-;-;-;-;-;-;-;-;-;-;-;-;-;-;-;-;-;-;-;-;-;-;-;-;-;-;-;-;-;-;-;-;-;-;-;-;-;-;-;-;-;-;-;-;-;-	13206	0.0996134	0.119714	0.115291	0.298941	0.31446	0.293045	5.71176e-07	1.3312e-05	-1.51522
PRKAB2	1;1;1;1;1;1;1;1;1;1;1;1;1;1;1;1;1	147155106;147159219;147160797;147161712;147161712;147162440;147162440;147162512;147166498;147166498;147166846;147166846;147167767;147171989;147171989;147172429;147172429	147159642;147159642;147160833;147161780;147161780;147162510;147162573;147162573;147166618;147166618;147166939;147166939;147167933;147172167;147172167;147172550;147172544	-;-;-;-;-;-;-;-;-;-;-;-;-;-;-;-;-	5460	7.81694	7.97169	7.9318	3.63093	3.2	3.80009	1.22522e-09	1.72657e-07	1.07405
PRORSD1P	2;2;2;2;2	55282319;55282329;55282329;55284003;55284003	55284472;55282434;55282434;55284522;55284437	+;+;+;+;+	2204	0.862141	1.14321	0.709994	0.623027	0.367648	0.253861	0.00636393	0.0183831	1.01091
PRPS2	X;X;X;X;X;X;X;X;X;X;X;X;X;X;X;X;X;X;X;X;X;X;X;X;X;X;X	12791355;12791370;12791406;12791488;12799207;12799207;12799207;12799207;12799355;12809234;12809234;12809234;12809234;12809234;12810022;12810022;12810022;12810022;12810084;12819507;12819507;12820644;12820644;12820644;12822704;12822704;12822704	12791619;12791619;12791619;12791619;12799390;12799399;12799390;12799390;12799399;12809332;12809332;12809332;12809332;12809332;12810146;12810369;12810146;12810146;12810119;12819680;12819680;12820803;12820803;12820803;12823165;12823086;12824222	+;+;+;+;+;+;+;+;+;+;+;+;+;+;+;+;+;+;+;+;+;+;+;+;+;+;+	2758	2.87951	2.90194	2.77555	5.44556	6.02286	6.08605	1.15476e-08	7.9644e-07	-1.11871
PRRT2	16;16;16;16;16;16;16;16;16;16;16;16;16;16;16;16;16;16;16;16;16;16;16;16;16;16;16;16;16;16;16;16;16;16;16;16;16;16;16;16;16;16;16;16;16;16;16;16;16;16;16;16;16;16;16;16;16;16;16;16	29811382;29811547;29811856;29811926;29811969;29812059;29812088;29812179;29812181;29812184;29812191;29812193;29812197;29812237;29812241;29812262;29812283;29812291;29812345;29812375;29812990;29812990;29812990;29812990;29812990;29812990;29812990;29812990;29812990;29812990;29812990;29812990;29812990;29812990;29812990;29812990;29813686;29813686;29814333;29814333;29814333;29814333;29814333;29814333;298…	29811555;29811616;29812036;29811976;29812328;29812087;29812323;29812323;29812323;29812323;29812323;29812323;29812323;29812323;29812351;29812323;29812323;29812351;29812404;29812472;29813408;29813933;29813933;29813775;29815880;29813778;29813933;29813393;29813393;29813393;29813933;29814009;29813372;29813019;29813038;29813439;29813729;29813933;29814465;29814465;29814465;29814465;29814725;29814429;298…	+;+;+;+;+;+;+;+;+;+;+;+;+;+;+;+;+;+;+;+;+;+;+;+;+;+;+;+;+;+;+;+;+;+;+;+;+;+;+;+;+;+;+;+;+;+;+;+;+;+;+;+;+;+;+;+;+;+;+;+	3755	1.50513	1.44727	1.89219	0.605668	0.849677	0.819523	2.53136e-05	0.000230705	1.01874
PRX	19;19;19;19;19;19;19;19;19;19;19;19;19;19;19;19	40393768;40393768;40398620;40403706;40403706;40407457;40407906;40407906;40407906;40408158;40408158;40408158;40408340;40408340;40413338;40413338	40397970;40398816;40398816;40403862;40403862;40407719;40408031;40408031;40408031;40408243;40408256;40408256;40408383;40408383;40413366;40413364	-;-;-;-;-;-;-;-;-;-;-;-;-;-;-;-	5767	0.844842	1.07085	1.04136	0.57294	0.351264	0.436587	5.10089e-05	0.000396868	1.02456
PSMC1P7	3	161328924	161330238	-	1315	0.77807	0.60112	0.77188	0.16316	0.192561	0.46094	0.00586633	0.0172313	1.31005
PSORS1C1	6;6;6;6;6;6;6;6;6;6;6;6;6;6;6;6;6;6;6;6;6;6;6;6;6;6;6	31114750;31114773;31114825;31114831;31114831;31114834;31114839;31115136;31117090;31125676;31125679;31125739;31129569;31129569;31133553;31137649;31138357;31138359;31138359;31138359;31138430;31138656;31138656;31139641;31139641;31139641;31139641	31114891;31114891;31114891;31114891;31114891;31114891;31114891;31118820;31117299;31125839;31125839;31125839;31129645;31129645;31133694;31137681;31138459;31138459;31138731;31139442;31138459;31138779;31138779;31140038;31140037;31140092;31140038	+;+;+;+;+;+;+;+;+;+;+;+;+;+;+;+;+;+;+;+;+;+;+;+;+;+;+	5781	4.56795	4.15337	5.66242	0.972382	1.07752	1.16141	2.81501e-11	1.00073e-08	2.08351
PTCH1	9;9;9;9;9;9;9;9;9;9;9;9;9;9;9;9;9;9;9;9;9;9;9;9;9;9;9;9;9;9;9;9;9;9;9;9;9;9;9;9;9;9;9;9;9;9;9;9;9;9;9;9;9;9;9;9;9;9;9;9;9;9;9;9;9;9;9;9;9;9;9;9;9;9;9;9;9;9;9;9;9;9;9;9;9;9;9;9;9;9;9;9;9;9;9;9;9;9;9;9;9;9;9;9;9;9;9;9;9;9;9;9;9;9;9;9;9;9;9;9;9;9;9;9;9;9;9;9;9;9;9;9;9;9;9;9;9;9;9;9;9;9;9;9;9;9;9;9;9;9;9;9;9;9;9;9;9;9;9;9;9;9;9;9;9;9;9;9;9;9;9;9;9;9;9;9;9;9;9;9;9;9;9;9;9;9;9;9;9;9;9;9;9;9;9;9;9;9;9;9…	95442980;95442984;95442984;95442984;95443412;95443412;95443412;95444162;95446159;95446911;95446911;95446911;95446911;95446911;95446911;95446911;95446911;95449069;95449069;95449069;95449069;95449069;95449069;95449069;95449069;95449069;95449841;95449841;95449841;95449841;95449841;95449841;95449841;95449841;95453478;95453478;95453478;95453478;95453478;95453478;95453478;95456276;95456276;95456276;954…	95446391;95446391;95446391;95446391;95447451;95446391;95446391;95446391;95446391;95447451;95447451;95447451;95447451;95447451;95447451;95447451;95447451;95449323;95449323;95449323;95449936;95449323;95449323;95449323;95449323;95449323;95449940;95449940;95449940;95453620;95449940;95449940;95449940;95449940;95453620;95453620;95453620;95453620;95453620;95453620;95453620;95456413;95456413;95456413;954…	-;-;-;-;-;-;-;-;-;-;-;-;-;-;-;-;-;-;-;-;-;-;-;-;-;-;-;-;-;-;-;-;-;-;-;-;-;-;-;-;-;-;-;-;-;-;-;-;-;-;-;-;-;-;-;-;-;-;-;-;-;-;-;-;-;-;-;-;-;-;-;-;-;-;-;-;-;-;-;-;-;-;-;-;-;-;-;-;-;-;-;-;-;-;-;-;-;-;-;-;-;-;-;-;-;-;-;-;-;-;-;-;-;-;-;-;-;-;-;-;-;-;-;-;-;-;-;-;-;-;-;-;-;-;-;-;-;-;-;-;-;-;-;-;-;-;-;-;-;-;-;-;-;-;-;-;-;-;-;-;-;-;-;-;-;-;-;-;-;-;-;-;-;-;-;-;-;-;-;-;-;-;-;-;-;-;-;-;-;-;-;-;-;-;-;-;-;-;-;-…	16591	0.0234932	0.0446669	0.0127456	0.0879377	0.0641018	0.0562062	0.00238215	0.00821644	-1.47726
PTGES	9;9;9;9;9;9;9	129738331;129738331;129748655;129748655;129749521;129752887;129752887	129739860;129739860;129748737;129748737;129749642;129753019;129753047	-;-;-;-;-;-;-	1896	2.51833	3.33533	1.8068	7.265	7.95979	7.91853	5.44623e-08	2.40649e-06	-1.68735
[truncated: 316 more rows]
